# Supplementary material
Source: publisher figshare collection journal article supplement (https://gsajournals.figshare.com/ndownloader/files/26000414)
Supplement: Supplementary file 1 [file 26000414]

>chr01
TAACCCTAACCCTAAACCCTAACCCTAACCCTAACCCCTAACCCCTAACCCTCAACCCTA
ACCCTAACCCTAACCCTAACCCTAACCCCTAACCCTAACCCTAACCCTAACCTAACCCTA
ACCCTAACCCTAACCCTAACCCTAACCCCTAACCCTAACCCTAACCCTAACCCTAACCCT
AACCCTAACCCTAACCCTAACCCTAACCCTAACCCTAACCCTAACCCTAACCCTAACCCT
AACCCTAACCCTAACCCTAACCCCAACCCTAACCCTAACCCTAACCCTAACCCTAACCCT
AACCCTAACCCTAACCCTAACCCTAACCCTAACCCTAACCCTAACCCTAACCCTAACCCT
AACCCTAACCCTAACCCTAACCCTAACCCTAACCCTAACCCTAACCCTAACCCTAACCCT
AACCCTAACCCTAACCCTAACCCTAACCCTAACCCTAACCCTAACCCTAACCCTAACCCT
AACCCTAACCCTAACCCTAACCCTAACCCTAACCCTAACCCTAACCCTAACCCTAACCCT
AACCCTAACCCTAACCCTAACCCTAACCCTAACCCTAACCCTAACCCTAACCCTAACCCT
AACCCTAACCCTAACCCTAACCCTAACCCTAACCCTAACCCTAACCCTAACCCTAACCCT
AACCCTAACCCTAACCCTAACCCTAACCCTAACCCTAACCCTAACCCTAACCCTAACCCT
AACCCTAACCCTAACCCTAACCCTAACCCTAACCCTAACCCTAACCCTAACCCTAACCCT
AACCCTAACCCTAACCCTAACCCTAACCCTAACCCTAACCCTAACCCTAACCCTAACCCT
AACCCTAACCCTAACCCTAACCCTAACCCTAACCCTAACCCTAACCCTAACCCTAACCCT
AACCCTAACCCTAACCCTAACCCTAACCCTAACCCTAACCCTAACCCTAACCCTAACCCT
AACCCTAACCCTAACCCTAACCCTAACCCTAACCCTAACCCTAACCCTAACCCTAACCCT
AACCCTAACCCTAACCCTAACCCTAACCCTAACCCTAACCCTAACCCTAACCCTAACCCT
AACCCTAACCCTAACCCTAACCCTAACCCTAACCCTAACCCTAACCCTAACCCTAACCCT
AACCCTAACCCTAACCCTAACCCTAACCCTAACCCTAACCCTAACCCTAACCCTAACCCT
AACCCTAACCCTAACCCTAACCCTAACCCTAACCCTAACCCTAACCCTAACCCTAACCCT
AACCCTAACCCTAACCCTAACCCTAACCCTAACCCTAACCCTAACCCTAACCCTAACCCT
AACCCTAACCCTAACCCTAACCCCAACCCTAACCCTAACCCTAACCCTAACCCTAACCCT
AACCCTAACCCTAACCCTAACCCTAACCCTAACCCTAACCCTAACCCTAACCCTAACCCT
AACCCTAACCCTAACCCTAACCCTAACCCTAACCCTAACCCTAACCCTAACCCTAACCCT
AACCCTAACCCTAACCCTAACCCTAACCCTAACCCTAACCCTAACCCTAACCCTAACCCT
AACCCTAACCCTAACCCTAACCCTAACCCTAACCCTAACCCTAACCCTAACCCTAACCCT
AACCCTAACCCTAACCCTAACCCTAACCCTAACCCTAACCCTAACCCTAACCCTAACCCT
AACCCTAACCCTAACCCTAACCCTAACCCTAACCCTAACCCTAACCCTAACCCTAACCCT
AACCCTAACCCTAACCCTAACCCTAACCCTAACCCTAACCCTAACCCTAACCCTAACCCT
AACCCTAACCCTAACCCTAACCCTAACCCTAACCCTAACCCTAACCCTAACCCTAACCCT
AACCCTAACCCTAACCCTAACCCTAACCCTAACCCTAACCCTAACCCTAACCCTAACCCT
AACCCTAACCCTAACCCTAACCCTAACCCTAACCCTAACCCTAACCCTAACCCTAACCCT
AACCCTAACCCTAACCCTAACCCTAACCCTAACCCTAACCCTAACCCTAACCCTAACCCT
AACCCTAACCCTAACCCTAACCCTAACCCTAACCCTAACCCTAACCCTAACCCTAACCCT
AACCCTAACCCTAACCCTAACCCTAACCCTAACCCTAATGACGGAGGGCTACGGAGACTG
GAAAGATAGCGTATGGTCACACGTTTTCAAGACACACACACCTTATTCGCATCGGGATAT
CTTTCTTGTGAGTCGAGAAAAACAGAGAGAGACCAGACAGCGTAGCAGAGAAAGAGAATG
TATTCACCGTTTTCGGGCAGCAGGCTGCCGGTCAAACACATACATTAGAAGGCAAGAAGA
ACTGGGCACTCAGTCCTCGCAGGGAGGAACACACACAAAACAAACAAAAGCATTGTATAT
TCGAATAAGGTTTACAATTTATAATTTGACCAAACAAAACATGTAAATCGCACAGGAATA
AGCTATTGGATGTTCTTTGGAATATTGACTAATAAACCACAATTAGCAATACTGGGTGGT
CCTCGAGGCTGAAATATAATTAAACTGAATCATTGAACAACTGTTGTTACCTTATCCTAC
GTACTACATTCAAGAAATGTACCTTTGTCACCAATAAACAAAAACATGAAAACGGTATTG
GTGATTGACACAACAGAATGTAAACTAAACAAATTAACAAAACTACGTAGGCACAGCGTT
CATCAAAAAACAATAATTTAAAACTTACAGGTGAGGGTGGGAGGGAATCTTAAAAATAAT
TTTATTAAAAGACTTTTACTATAAATAAAAAGAGAAAACGAAAATAAAAAATGAACAATT
TTTCTTTTCCCTCCTCCCAAAATACAATTTTGATGTTGGAGTGACTTATCGCAATGCACG
GCATAAATCTACAAGTCACTCGATAAAAAAGAAAAGAAAACATTTATTTTTTCCAAAATA
TTTTTCGGCGTCGCGGATCGTTCCGATCCCGCGCCACCGTCATGCCGCTTCCAAACTCCG
TTTGGAACGGCTAATGACGGAGGGCTACGGAGACTGGGAAGATAGCGTATGGTCACACGT
TTTCAAGACACACACACCTTATTCGCATCGGGATATCTTTCTTGTGAGTCGAGAAAAACA
GAGAGAGACCAGACAGCGTAGCAGAGAAAGAGAATGTATTCACCGTTTTTGGGCAGCGTG
CTGCCGGTCAAACACATACATTAGAAGGCAAGAAGAACTGGGCACTCAGTCCTCTTCTAC
ACCCCCTCTCTCCGCAGGTCACGCCGTGGCTAACGTCTTATCCCCATAGTTGTTATTATT
ATTATGAATGATTGTTAATGGTGGATGATACCATTATTATTATTACTAATACTACTAAGT
CACTCAACGAAACCTAATCCTCTGCCAGCGGGCAAAATGTTTCCTTGAGACTGGGCAAAC
GCAGACCAGAAGCATCCGACGTTCGTATTTCCCCAAAGCTATTATGGTGATGAAACACTC
GGGAGAGGGTATCTGCCGGATTCTGTGGACCGGCAATGTAGAAATAGGCCACCAGAATCC
CTTCCGTGTACAACATGTTGTAGGTCAGCTCAAACAAACGGTTCAGCGTATAGCCTCGTC
CGATGCCTCCAAAACCGTTGAGTTTCCGCTGTGCCGCCACAATCGCCTCGTGATCCGTCA
CGACCGCTACGCGTTTACCTGCGGTCAATACTCGAGTCTCTATTAGGTATTGCAGGACCT
CCACAATGCACCTTGGTTCTGCATGGGCACTGTGCTTCCGATTAAACCAAGTCGTGCGCT
CTTCGCCTCTAGGTCCGTAGTAGCGATTCACTACCAACTCGTCGACCCACTCCTTCTGCA
GCCCCGTCGTTTCACCGGTCTGCGTATCGTGTACAATGGCACCCCATCCGGCATCGGAAG
CATCCGTGTAAACGATAAAGTCATACGCATTCTCATCGTACGTGACTTGCATCTTATCCG
ACACCCTTGCGTACTCGTTGCGGGAAAGCAAGTCTATTACCCGCCGTAACTCCTCCTGCA
CCGATGGGGCCACGTGGTTTAGTGCCACGTCCCACTCGCCGCCAGTTCGGCTCACCTCTG
TATAAACGGCACGATACACCTTCAATAAGAAGAATAAGCCTGCTGGATTCTTATTGGTCG
TGTGGAACGCAAACAACACTAAGCTGATCATGCTGACAAAGCTTCGACACGTGTAGTAGG
GGCACTTCCTCATGCATAGGTTTAGCTTGGCTACTGTCTTTGTGGAGTTTCGTACCACTC
GCTCCTTCAGCCTAGTGTCCCACGCATACTCTTCTCCGAGAAAAGTGTTGTTCGCCAACG
CCATGCTCAGGAGATCATCACTTGAGGTACAAAGTAGTACATCCCGGTCCGGTGAAGTCT
CCAGATTCACACATCGTATGCGTTCCAAAATGCGTCTCACCGTCACCACAAACACTTCTT
CCTGTCCTTCACGACCACCTATAATAATGTTGTCTATCATGGTTAAAATGGTCAACGGTG
TGTCTATATCAACAATGGTGGAAGTAATAGTTTGTCCAACCATCACACTCCACCGGGCCC
CAGTGGGAAGCGTCCTCAACCGGTAGTACTGTCGGTCCTTACCCAAGAAAACAAACTTGT
TCCGTACATGGACGTCGTGTAGCGGAATCGCATCATAAAAGCTATTAAAGTCTATCTGCA
ACAGCCACTTGCAGTGTTTCAACGCTTGTCTCTTCTCTAGACGACCGAGGCTTTCAACGC
TTGGGATAGTTTCCACGTCGACAATGCTATTCAAAATAGGTTCTGTAATGAGACGTCGAC
GTCCCTTCAGCTCCGTCACATAAAACGCGTTGACACTGTGATACTCGCTTGGTAATCTTC
CAAACCGCGTTCTCGGTCCACCATCGCTGCTGCGCGCATACTGATCCAAAGCTCGGTTCA
ACTCGTCACACAGCTCAAACTTTCCTCGCTCGACCGCCAACCGGACGTCCTCCATAGAAA
GGGAGGTGGTCTTTATCGTTCGTGATGTGCGCATGCCACGGTAGTAGTCCGTTTGTAGAA
ACTTCTGAACTTCAATCAACATATCCATCGTTTTACTGTGTGCCACAGAAAGGCGTAACA
GACTCTGTATATCCAGTAAGGACGGGCACTTCAAGTGTAGTGGCCACTGTGGACTGGGAT
GCCGCTGCATCGTCTCCAGTCTGGTACGCCAACTATACGCTTCTTCAAAGTTGCCTTCTC
GTTCAAACAAGACAATCATCTCCTCTACGATCGAACACTCTTTTAGCCCTAGATCCCGTG
TCTTCGGTGCCTTGGCGCCTAGTTCAAAGGACGTCGGAGGCGGCGGAGGGCGACCGCGGC
GTGTTCCTGTAGGTCGACGTCCCCCCTCGTTGGTTGGCGGCCAACGCCCAGGTATCGATG
CAGGGTTTCCAACCTCGTATGGCCGCTGATCGCCACCAACTCTCCTTCGGTCAGACCCTG
TTCCGCCAGAAAACACAAGGCGCTCTTTCGTATCGACGGTACAATGGCTCTTTCCTTCAC
CTGCTTCAAGGCCCACAAAGCCTCCTCGCGCCGGTCCTTGGTCTTTGGAAACAGTAACTG
GTTCGTTCGTCGGTGCGTCATCAACTGGTGCAATTGATCCGCATCCTCGCGGGGGATCGC
CGTATGGATTATGTACGTACCGCGAAAATAAGCGCCCTTTCCCCTCTTCATCGTCACGGA
GATGGGTATCATATCCGACCCTAGTTGTGGCGAGAGGAGGGTGGTGGTCTGGGCGTCCCG
GGTAGCACCGGTTTGAAACCAAACATCCCGGATCTTGAGCTTGTCCAAGTCTCCTGCCCG
AGCCGCTGTACACCACATTAACCTTAGGTACAAAGCAGTCAGTGGCATCGTGTGGCGAAT
CTTTCGATGTAAGTCCTGGAATTGACGCACACGGATGACTGCCGTCTCCTTCGAGTCGGA
CCGCTGCTGCATCCACTTGGAAAACTTGACCGTCTCCACCCATCTTGGGTACGTCTTGAG
ATCGATGCCGCACTCCTGATTCGAGTACAGAGGAAGATGGATCAACGCCGACTGAATCAA
CATCAACTTGCGGACAAACGTCGCCCAGGTGTAACTTCGCGCCACTGCATCTTTCGCTAG
CATGTCGATCACCACCTCGTCGACCGGGGAACACAGGTATGCGGAAGGTAGCTTTTGGAA
CCGTTGAAGCCATTTGAGGCGTAGCGCATGTTCCCCGCTCTCCTTCTTGTTGAAGTACAA
CGGGTGCTCGTGGGGGTTTAGTATCCACAATCTCGGGCAGACAGACCCCCACATGGTTCG
TCCTTGTCCGCCTAACTGCCTGCCCGACCGGTTTTTGGGAGCGGTATCTGTACGCGCAAG
GTAAGTCCCTGCATTGTCGGATGGGTCTAACTCCATGGAGTCGTCCTGTATCATTTCTTC
CGCTTCTAGCGGTATAGTTTCGTATCGTGCGGCAGATGTCGCCGTCGTCTGATGAATGCC
TGATTCTGGTGGTGGGACAGAATATGGAACGTCATCGGGACTATTCACGTACAATCCCAC
CAGAGCGCACTCACTTCTTGTGCACAACTCGTAATGGTCGTTCACAAAACACGCTCCAAC
CACAAACTTCCGATGACCAACGCTCTCTGGAAGCTGAATAGTCGGTTCGTTGCCTTTCTG
AAGAAACAGGGGTCCTGGGCGAGCGGTGCCTACCACCTCTGGTTCACCTTCTCTGTTGGC
TTTGCCGAACGGGTGTGGTTGATACCCATACAAGTACAAAAGGTCCGCCACATCGTTGGT
AGAACCAGAGGCAAGCTTCTTTTTGCCGGCCTGGGACGTTAAGTTGGTCCACTCCACCAA
GCGTTTCTTACCCTCTGCTATGGCGATCATGGCAATGGCAATGAACAGACTTCTCATTTT
TGGGTTGTTTTTGAATCGTCGGAGGTGAAAAGAGTACTTTTCGAGGTAATATTGAAGGAG
CGAATGTCGCTCATTTGTGTTTTGGCCACCCTCTACAATAGGAGAGTACAAGATGTCTTG
TACGGCCGCCAAGAATGTCGGCTTTTGGGAGGGATTTGCAACATACTCGGAGAGGAAGTC
TCTCAAACGTCTTATTTTGCTCTTAAGATCCTTAATGGGAAATCTAAAAAATATGCCCGC
GTAGACGGCGAACATATAGAGTCCGCAGTCCATGCTGTCCCTTTCTTGACGCTGTATGCT
CTGTTCTTTCACCTCAATATTTAATTTCTTGAGGAAGACTCGGTCAATGTCTCGCCTCAC
CTGATGGGAGGGAGCCGAGTCGTAATACACCAGTGTCGGTGTACCGTCGGAACGGATGCG
AAGGAAAGACGCGACCCAGTGGCTTCTCGTGTAGATTGGAATGAATACCATCTTCCCGTA
GTCCGCCAGATGGACAATCTTCTGCAGATACTCGGGGGTCTCCTCTAGAATAGACACACA
CGCCACGGTCACAATGTTTTTGTTGTTGAACAGATTTAGGAGAGTGTTTAGCTCCTTTTA
TCCGCATCCTCGAATCTTAAACAAAAATTATAAAAAGACTTTACTATATAATAAAAACGA
AAATGAAATAAACTATCTTTTCCATCCTCCAAAAATACAATTTTGATGTTGGAGTGACTT
ATCGCAATGCACAGCATAAATCTACAACGTCAATCGATAAAACATAAAAAGAAAAAGTTA
TTTTTTACCAAAACAATTTCGGCCTTGCTGATCGTTCCGATCCCGCGCCACCGTCATGCC
GCTTCCAAACTCCGTTTGGAACGGCTAATCTTAACAAAAATACGGACGCTCGCCCCAACA
GAAAACTACAAAGAAGGACGAATGTTCCAGCACCAATGATTCGATAATCATTAACCAGAT
AAGCGAAAGTAAAATCATATGCGAAACGATTGAAGGAGTTACCTTCACAAATGAAAACCT
CGTCAATGGAGTCACCGCTTACTGTAGAAAAATAGATCTTGTGAGCAGGGACAACAAGAA
TTCACGACGTCCCAACCATACAGTCCTTATACAGTAACAGTACAACAAAACGTGCTCAGA
AACGGTACCAGGGACTTGAGGATCGAATGAAAGATAAACAAACGTATTAAATCACTGAGT
CACATATCAATCACCAAACCTTGTACACGAAGTAACATCAAAAGATGCGCAACACTGTAA
CATGAAACGGCACGGTTGCACGCGTGTTTAGTGTCTTGAAAACACTCTTTCACAAGCTGG
TCAGTGCCATATTTCACATTCTCTGAGTGGCCATATTCATGACCTCATGACTGACAAAAG
GTCTTACAAAAAATTGGTGGATGTATAAAAAACACAGAAAAAGAAGGAAGACTAAAATAA
CACGATTCAATCACAGGTAGAAGAAAGAAGGAAGAATAAATAATAGTAGAAATAAAATAT
AACACTTTAAACCTTAGATTTAATCCGTTCAACAACAAAAATCAAAAATGTAATGAGTGA
TACTTAAATTTAAAACGAATTAGTTTTCACGCACTATGCGAAAAACCCGAAAAAGAATAA
AGAGCATCACCACTTCCCTTCAGGAGTGGGGTGCACGACTTTATTGCCTACTGATTCTAC
GAAAATTACCACCGCTATCGCACGGAAATCTCTGGGTACCATGACGAATCTTCGTTACAA
AGAGACTTTAAGCGGTCTGGGATTTCGCTGGACTGAATAGAAGTGCCTCTGATGAATATC
GTCTTGAGTTCTGGCAAACCTGACAATACCTTAAGACTCTTTAGCCTTCCGCACTGTGTA
ACATCTAGGTTCTTTAGTGCCACGCACCCAGCGAGCCCGTCAACGTTAGTAATTCCAGAG
TCGTCGGCCCTCACTGACTTTAGACTCGGTAGACCAGATAAGCCATCTAGGCTAATCAAA
TGCTCGCACTTAGACACGCTTAGTTCCTCCAGCGCCACACATTGTGCTAAAGCAGGGAGA
CTCGTAATCATACATCCATTTGCATGGAGGATTTTCAGCTTTTTCAGTGTAGTCAATCCT
TCTAAACAAGACAAACGGTAGCAGTAACTCACGACCAATACCTCCAGCGCAAAACAACTG
GATAGAGCGGTCACGCTTGTTATGGCAGTAGAGCTGAAAATAGCCTTTTTTAGCTGCGGC
AGGCCGGAAACCCCATACACCGAGTTTAGGTTTCTGCACTTGCCCATGTCCAGCGTTGTC
AAAGCGATGCACCCAGTGAGACCACGAATGCTTTTCATACACGAGTTTTTAGCGTACACG
GATTTCAGGCTCTGTAGCCCCGAGAGGCCATCCAGCGTTTCCAGCGCTTCACACTCACTT
ACATCCACTTCCTCGAGAGACAAGCACCCTGCTAGACCCCGAATGTTAGTGATCCCAGAC
TTTTCGGCCTTCACCGTTTTCAGATTCTTTAACCCTGATAGGCCATCCAACGATTCGAGA
CTTTTACAGCTATCCGCGTAAATCGCCTTGAGAGCCACACACCCAGAAAGCGCCCGAATG
TCCGTTACCCCACTGTACGCCGCACGCACCACCACGAGACTCTCCAGATCCGAAAGCCCA
TCTAAGGAGTTCAGGCCCTTGCAGAAACTCACATTCACTTCCCTGAGTGAAACGCACCCG
GACAAAGCACGAACGTCCGTAATACTCGTACTTGATGCGTCCACAACCTCCAACTGTTTC
AACCCCGACAGGCCATCTAAGGAACTGAGACGTTCGCATCCGCTTACTTCTACTTTTTTC
AGCGCCACGCAACCACTTAAAGCAGAAATGTCTGTAATACGACTAGAGCTGGCATCCAGG
GTCTTCAAGTTTTGCAAGCCGGACAAGCCGTTGATGCAGGATAGCTCTTTGCAGGCAAAT
ACATTCACATCCTCCAATGCCACGCACCCCGTTAGGCCCCCAACGCTCTCAATTCCACTC
TCACTGGCATCGACACTCACCAGACGCCTCAAACCAGAGAGGCCGTCAAGACTCATTAAG
CTTTTGCAGTTACTGACATCAACATGTAGCCACCCATCCCCATCGGGTAGAGAATCAATA
TCGCAAATCCCACTGTGATTAGCGTCCACTGATTGAAGATTCCGGGAGTCTGACAACCCG
CACAAATTGTACAAGTTTTCACAGTAACTTACGTCTACCCCCTCTAGGGACACACATCCA
CACAGTCCTCTCATACAACCTATACTGGAAAATGAGGCATCTACTCCCATTAAGTTCGGT
AATCCAGACAGTCCGTCGAGCGAACCCAAACGTTTACAATTGGAGACGTACACCCTCTCC
AACGCCACACATCCGGCTAGTCCGCTAATATCATCAATGTTACTGTAGGAAGCCAAAACT
TCCCTAAGATTTTGTAATCCAGACAGTCCGTCGAGCGAACCCAAACGTTTACAGTCGGAG
ACATCCAAAAGCTGCAGTGACAAGCACCCAGTTAGGCATTCAATACTCTCAATTCCGCTG
TAGCTGGCATACACCATCTGGAGCTTCTTGAGCCCGGAAAGTCCGACAAGAGAGTTTAAA
TTTCTGCTGAAACCTACGTTTACCGACTCCAGCGAGGTACAACCAGCAAGAAAAGCAACA
CTTGTGATACCGCAGCCCTTCAATACAACATGTTTCAGGTTTTGAAGCTTCCATAACGCT
TCCGGTGAAGTCATATCATGGGAATACTCCACGGATACACTAGTGAGGTTAGAACAGGTC
GAAAGCGGGTCCAGACTGAATGCCCCACTGCATTTGCACAATTCCACCTTCTCCAATCGT
TCAAGTCCTTCCAATGCCTGTAGGGATGCTATTTGACATTTATTAAGACAAACCCCATCC
GATCGCATCAAGAGAAAGCAAAATGGAAGCAGAGTGTCCACCTCACTGATGTTCAAGTCG
AACGTGTGCTCAACTCCTCCCTTATCGAGCTTTTGTGAGAACGCTTCCAATTTGGGAACG
TCTTTCAATGATTCCCTGCCGTTGAACGAAACGGTAATGTGTGGTGGAAATTCACGTTGT
TCCTCTCGCCAAAGCTTCGCCTCTTCCAGCTGCGCCACATCGGAAGATTTTACGTCAAAG
AAACGAGTCGCTGTAGAGGTATTATTGGTATCGCCGCTTGGACCCCCCATATGGTACTCA
CTGATCATCCTGGTCTGAAAACAGAGACCCGGGAGGGTAAGTCGCGGCAACTTATTCAGG
AAGCCGGCGTAGCGCGAAATACTTCGAAGTGGAAACATTGGTGGCCAATCTACTGAAAAC
CAACCAGACGTATCAACCGCAACCTACAAAACAGAAACCTAATTAACAACAATTAGAAAT
AGAGAGAGAGAGAGAGAGAGAGAGAGAGAGAGAGAGAGAAAACAATACCCCTAGGTCGAA
GCTTGTCTAAACAAACCAGTCCAGTCATTTGAAAAGAGAGAAGAACTCAGACAGAATTCC
ATTTAGTGTTAATATCGTTCGCACGAGTGATTCATACGACAAATTAATGTTGGGTCTCTG
CAGCTCAATACACTACAATTATCAGAAGGCATCGTGTCTTATGTGGGCGAACGCCGCCCA
CCTCGCTCATGGCAAAAACAAAACGAAAACCCCTAAAATATAAGTTTTTCAAGAACCGGG
CATCCTTCTAGACGCGCACAACGGGGAGCGACGGCGCCAGTCGCGTCCACGGTCCTCAGG
TTTGTCAGACCCCATAGGCCTTTCAGAGAAGTCAACTGCACACACTGTCGCAAGTGCACT
GACTGAAGCGCCGCGCACTCAGAGAGTGGGGTAGCTTCAGTGACGTTAGTACCAGAAGCA
TCCACCGTCGTTACGCTATTCAATCCGGACAAACCGGCAAGCGACACCAAAGTTCTAGAG
GACCGAGACCGAGGTTACCGCGACAAGACGACAGTTCCAATGTTCCCAACCTCCCGAGTC
TTCCCAGAGACTGCAAAGAGGTCAAGGCACACTTACGAAGAATAATATCCGCCGCCTGCT
GCAACACTGGAGAAAACGGCAGAAGAGAATCAACACCAATAATATTCAAGCCGATCGTAT
GGCAGACATTGTTGTTAGTGAGTTGTAGAGAGAACTTTTCTAGTGCGGGAATATCAACCA
GACATTTCCGGCCACTGAACTCGACAACAATATGCAGTGGATATTGCACCTGTTTGATGA
TCCACCAACATGCGCACTTCAGCCCAACCGCATCCGGTGACCTCAATCTATGCACTTGGC
GCATTCCATAACTGTCATGGACAACTGTACATCCAAGTACGCCTCGTTCGTAACGCTCTC
CACACTCCCTGGCATGAATACTGGCTCCTGTGAGGGCAAGTGGGGGCGACCCCCCAAAGT
AGCCAGTGTAGTCACAAATGCTTTGAAATGGAAGCACGGGTAACCAAAAATTACAAAAAA
AAAAATAGAAAGCCAACTGTAACGAAAACAGTGGAGTCTTAACCCATAATAAAAAGAAGC
AACGGGGCTGAGCATGAAAATGGGGCGAAACAGCACTCACCCAAGAAATAGTTGTAAGTG
AGCTACCAACACGCGGAGGGTTCATGGCAATCACCACAATCACACATTAAGACAGCACCA
GACAATCAATGTCAATGAACGCGACATCTGCAAGAGCAAACCTCTCAACGGTTTCACGCA
CCAAGACGGGAGAACCTCTGATCTGTCTCGTCGCCTTTCATGGAGTAAGCTCATCAAGGA
CTGTACTATAAACACATTAGATATTTGCTACTTGATTTGACTTCCTCGTTTTATTCTGGT
GATTGGGAAAAGAGACAACAAGAGAAAAGGCATAAAATTAAATAGCGCTGGCAGCACTAT
ACACACAACAGAATAGAGCAACACGGAAGTCATTATGCTTTCGAAGCGCTCAGTGATTAA
TCTCTATCACTTAAAGAAATTAATATAGTCGCAGACGCGGATTATAATGAGTAAAATAAA
TATAAACGCTGTTATTGTTATTCGTACAGTAGAGAAAAAAAACGGTAACAAAATAATATA
TATTCGACAGCAATGAAAAAAATTCTACGGGAAGGGGGTACCGGTTTCGGTACCTGAAAG
AGAATAATATAGGAACGGAAACGACGTGTTTCGAACAACGAAAAAGAAGGCTGTCAATAT
ATTACGTAAAAGAAAAAAAAAATGTACGTACAAAAAAAAAAAAAAAAACGTCGCATAATC
TCGACAACAATGAAAACAATTCTACGGGAAGGGGGTGCCGGTTTCGGTACCCGAAAGAGA
ATAATATAGGAACGGAAACGACGTGTTTCGAACAACGAAAAAGAAGGCTGTCAATATATT
ACGTAAAAGAAAAAAAACAAATGTACGTACAAAAAAAAAAAAAAAACTCGTCGCATAATC
TCAACAACAATGAAAAAATCTACGGGAAGGAGGTACTGGAGAATTCACCCCAATAAAAAA
CGCTGCGTAGTTTTCCCGGAGTGATCCGGAGAAACAGAAACCCCAGCCCCAAAAAGGCAA
GAGTGCATCTCGCATTGCGCTTGACTCCTACAATGTTCTCATCATTGTCAAAAAAGAAAA
TGATTAAAAAAAAAAATGTCGCCGTTCTTTTTTAGCGACTCTTTGTCTCTTATGTCACGC
CCAAAACACATGAAAAAAGATGAACCACTGCCATAGCCCAGCGGCGCAGCGCCACCAACA
GCCAGCCCATGGCTCCTAGAGGACGATACTTGTTCTACATTCCACTGACGGTTTTCCTCC
TTTGCGATCTCTTGACTGGCACCGTCGGCAAAACTCTGCGTACTAACTCTACTTATCAAA
CTCTGGCCACCCATTTATATCTTCGTCCTTCAAACGCTGCTGGGAGCAAGACTCGGTTGC
CCTTCTTTTCTGTATTGGTGCATCAGCACTTTTCTTCCTCCGGCTATCCGAAGTTCACTA
GGGTAATCTTTGCCTTACTACTCCATAACAGCCTCGGGTCCGGTCGAGTGCAACCCACCA
CAATCGGTGACACGCGACTTCCGCTCACTGTCATGACAACTTTTAATATGGGAGGTTCTC
TGAGCCATACTGACTGTTAATCATACGCCTCCGGCGACACAACAAGTAGATCACTAGCAA
CACAATCGCCAAAAAAACAACGACAGAGGCAACAATAATACCAACCATACCACCGTATGA
CAAGCCTCCCTTTCCTGAATTCTGTGAAGTCCTATCATCAGCGCAACTCGGACCAGACCC
TACTGTACAAACCTCACAGACGTCCTCCTTGTTATCCACACATTTGGCACAATTCTCAAC
TGAGCACCGCATCGGGATGCAACCTCCATTGCCATCGCGCTTCAGGTTCCTAGCGCAGGT
CTCGCACTGGTCTTCCGTGTCGTACACGCAGGTGGCACAGTGGGCCACGGAGCACGTCTT
GGAAACACACTGCTTGTTCTCGTCCAGCTTGTACGTCGCGGTGCAGGTCTCGCACTGGTC
TTCGGTGTCGTACACGCAGGTGGCACAGTGGGCCACGGAGCACGTCTTGGAAACACACTG
CTTGTTCTCGTCCAGCTTGTACGTCGCGGTGCAGGTCTCGCACTGGTTCTCGGTGTCGTA
CACGCAGGTGGCACAGTGGGCCACGGAGCACGTCTTGGAGACGCACTGCTTGTTCTCGTC
CAGCTTGTACGTCGCGGTGCAGGTCTCGCACTGGTTCTCGGTGTCGTACACGCAGGTGGC
ACAGTGGGCCACGGAGCACGTCTTGGAAACACACTGCTTGTTCTCGTCCAGCTTGTACGT
CGCGGTGCAGGTTTCGCATTGGTCTTCGGTGTCGTACTCGCAGGTGGCACAGTGGGCCAC
GGTGCACGTCTTGGAAACACACTGCTTGTTCTCGTCCAGCTTGTACGTCGCGGTGCAGGT
CTCGCACTGGTTCTCGGTGTCGTACACGCAGGTGGCACAGTGGGCCACGGAGCACGTCTT
GGAGACGCACTGCTTGTTCTCGTCCAGCTTGTACGTCGCGGTGCAGGTCTCGCATTGGTT
CTCGGTGTCGTACACGCAGGTGGCACAGTGGGCCACGGAGCACGTCTTGGAGACACACTG
CTTGTTCTCGTCCAGCTTGTACGTCGCGGTGCAGGTCTCGCATTGGTCCTCGGTGTCGTA
CTCGCAGGTGGCACAGTGGGCCACGGAGCACGTCTTGGAAACACACTGCTTGTTCTCGTC
CAGCTTGTACGTCGCGGTGCAGGTCTCGCACTGGTCCTCGGTGTCGTACACGCAGGTGGC
ACAGTGGGCCACGGAGCACGTCTTGGAAACACACTGCTTGTTCTCGTCCAGCTTGTACGT
CGCGGTGCAGGTCTCGCACTGGTCCTCGGTGTCGTACGCGCAAGTGGCACAGTGGGCCAC
GGTGCACGTCTTGGAGACACACTGCTTGTTCTCGTCCAGCTTGTACGTCGCGGTGCAGGT
CTCGCACTGGTTCTCGGTGTCGTACTCGCAAGTGGCACAGTGGGCCACGGAGCACGTCTT
GGAAACACACTGCTTGTTCTCGTCCAGCTTGTACGTCGCGGTGCAGGTCTCGCACTGGTC
TTCGGTGTCGTACACGCAGGTGGCACAGTGGGCCACGGAGCACGTCTTGGAGACGCACTG
CTTGTTCTCGTCCAGCTTGTACGTCGCGGTGCAGGTCTCGCACTGGTCTTCCGTGTCGTA
CACGCAGGTGGCACAGTGGGCCACGGAGACGTCTTGGAACACACGTTGTTTCGTCAGTTG
TCGTCGGGCGGTCTGACTGGTTTCGGTGTCGTACACGCAGGTGGCACAGTGGGCCACGGA
GCACGTCTTGGAAACACACTGCTTGTTCTCGTCCAGCTTGTACGTCGCGGTGCAGGTCTC
GCACTGGTCCTCGGTGTCGTACTCGCAGGTGGCACAGTGGGCCACGGAGCACGTCTTGGA
AACACACTGCTTGTTCTCGTCCAGCTTGTACGTCGCGGTGCAGGTTTCGCATTGGTCTTC
GGTGTCGTACTCGCAGGTGGCACAGTGGGCCACGGTGCACGTCTTGGAAACACACTGCTT
GTTCTCGTCCAGCTTGTACGTCGCGGTGCAGGTCTCGCACTGGTCTTCGGTGTCGTACAC
GCAGGTGGCACAGTGGGCCACGGAGCACGTCTTGGAAACACACTGCTTGTTCTCGTCCAG
CTTGTACGTCGCGGTGCAGGTCTCGCACTGGTTCTCCGTGTCGTACTCGCAGGTGGCACA
GTGGGCCACGGAGCACGTCTTGGAGACACACTGCTTGTTCTCGTCCAGCTTGTACGTCGC
GGTGCAGGTCTCGCACTGGTTCTCGGTGTCGTACACGCAGGTGGCACAGTGGGCCACGGA
GCACGTCTTGGAGACACACTGCTTGTTCTCGTCCAGCTTGTACGTCGCGGTGCAGGTCTC
GCACTGGTCTTCGGTGTCGTACACGCAGGTGGCACAGTGGGCCACGGAGCACGTCTTGGA
GACGCACTGCTTGTTCTCGTCCAGCTTGTACGTCGCGGTGCAGGTCTCGCACTGGTCTTC
CGTGTCGTACACGCAGGTGGCACAGTGGGCCACGGAGCACGTCTTGGAAACACACTGCTT
GTTCTCGTCCAGCTTGTACGTCGCGGTGCAGGTCTCGCACTGGTTCTCGGTGTCGTACAC
GCAGGTGGCACAGTGGGCCACGGAGCACGTCTTGGAAACACACTGCTTGTTCTCGTCCAG
CTTGTACGTCGCGGTGCAGGTCTCGCACTGGTCCTCGGTGTCGTACTCGCAGGTGGCACA
GTGGGCCACGGAGCACGTCTTGGAGACGCACTGCTTGTTCTCGTCCAGCTTGTACGTCGC
GGTGCAGGTCTCGCACTGGTTCTCGGTGTCGTACACGCAGGTGGCACAGTGGGCCACGGA
GCACGTCTTGGAGACACACTGCTTGTTCTCGTCCAGCTTGTACGTCGCGGTGCAGGTCTC
GCACTGGTCTTCGGTGTCGTACACGCAGGTGGCACAGTGGGCCACGGAGCACGTCTTGGA
GACACACTGCTTGTTCTCGTCCAGCTTGTACGTCGGGATGCAGGTTTCACACTGGTCTTC
CGTGTCGTACACGCAGGTGGCACAGTGGGCCACGGAGCACGTCTTGGAGACACACTGCTT
GTTCTCGTCCAGCTTGTACGTCGCGGTGCAGGTCTCGCACTGGTTCTCGGTGTCGTACAC
GCAGGTGGCACAGTGGGCCACGGAGCACGTCTTGGAGACGCACTGCTTGTTCTCGTCCAG
CTTGTACGTCGCGGTGCAGGTCTCGCACTGGTTCTCGGTGTCGTACTCGCAGGTGGCACA
GTGGGCCACGGAGCACGTCTTGGAAACACACTGCTTGTTCTCGTCCAGCTTGTACGTCGC
GGTGCAGGTTTCGCATTGGTCTTCGGTGTCGTACTCGCAGGTGGCACAGTGGGCCACGGT
GCACGTCTTGGAAACACACTGCTTGTTCTCGTCCAGCTTGTACGTCGCGGTGCAGGTCTC
GCATTGGTTCTCGGTGTCGTACACGCAGGTGGCACAGTGGGCCACGGAGCACGTCTTGGA
GACACACTGCTTGTTCTCGTCCAGCTTGTACGTCGCGGTGCAGGTCTCGCATTGGTCCTC
GGTGTCGTACTCGCAGGTGGCACAGTGGGCCACGGAGCACGTCTTGGAAACACACTGCTT
GTTCTCGTCCAGCTTGTACGTCGCGGTGCAGGTTTCGCATTGGTCTTCGGTGTCGTACAC
GCAGGTGGCACAGTGGGCCACGGAGCACGTCTTGGAGACACACTGCTTGTTCTCGTCCAG
CTTGTACGTCGCGGTGCAGGTCTCGCATTGGTCCTCTTTATCAAACAAGCACTTGGTACA
ATGGGTCACTGTGCAACCTTTTTCGATACACTGACGGCTTGTTTCATTTATCTTGAGGCC
AGGGATACAAGCGGTACAACCGTATCCGTCGTTGGAAAGGCAATTGGGGTCCTCGCAGGT
GAGTGTGGAGTTATTGTCTCGGAGTACCGTGTAGGACGAATAGAGAGCGTTTTGCGGATC
TTTCCAGCTGGGCGGCACGCAACCCTTCAGTTCTGGATTCCCCGGTAGCAATATAGCATT
TACGAAACGGTAGTTTGTGGTAATGTAGGACTGTGGAATGTAGCCGGTGATGCGATTGTT
AAACAGCAGCAACTGTTGAATATTAGGAGGAAGTGATTCGGGAAGCGCCCCGTTGAGCTG
ATTGTCGTTGAGAAACAAATACTGTAAGGAAGTCACAGTGTTCCACTGCAGCGGCAAGGT
GCCGGTAAGGCGGTTGTTGAAAATCTGCGCATTTTGAAGTGACGTCATTGTGCTCCACTG
CGGCGGTAATGAGCCAGCGAGCTGGTTGTTGAAGAGATACAAAAATGTAAGTTTACTCAT
TGCGCCCCACTGTGGTGGCAGAGTACCGCCAATCTGGTTGTCATTAAGAAACAAAAACGT
AAGGTTAACCATTGTACTCCACTCTGGTGGTAACGTGCCGGTGAACTGGTTGCCATAGAG
AGACAGGAAAAGAAGATTCGTCATGGAACTCCAGCTACTCGGAAAAGCACCAATGAGCTG
GTTTCCATAAAGCTGTAAATTGGTGAGTGCCCGCATAGTACTCCACTCTGGCGGCAGTGT
ACCGCCAACTTGGCCGTTGAAAAGCGCAAAAGTCGTCAGCATCGTCATATTGCTCCACTG
CGGCGGAAGTAAACCGGTAAACTGGTTCGTGTCAAGCTGAAAGTCCACGAGCGCAGACAT
CTTTCCCCACTCCGGCGGGAGTGTACCGTCAAGTTCGTTGCTCCGCAAGGAAAAATACTG
GAGTTTGGTCATGGAGCTCCAGACAGCTGAAAGTGTGCCAGTAAACGCATTTTGGAAGAG
AAATAAAACCTGAAGCGCTGTCATAGCACTCCACTGGGGCGGCAGCGTTCCCGAAAACTG
GTTGTTGGAAAGTCGTAAATCTTGCATTGCAGTCAAGGCACTCCACTCTGGCGGCAGTGC
GCCGCTGAGCTGGTTGTCATGAAGAAACAAACGCTGGAGAGCTATCATGCCGCTCCACGC
AGCGGGGAGAGTGCTGGTCAATCCGCAGCCGTTAAACACCAGAGACGACATCGTCTTTAT
TCGTCCCCAATCTACTGGGAGAGTTCCTGATAGTGTCTGACATCCGCCACAGGCGATGCT
GACAATGGTCATTTCTTCATACTTGTACGAACTGAACGGCGACAAGGCATGGTCTGGTAA
TGTTCTGGTGGTACTATTAAACGATGGAACTAAGGCGAGGTTGATTACTTTCACAAAACC
ACCTTGGCACGTGATACCGGCAGTCGTACAAACTTTAGCAGTAGTGATACCAGAAATGCC
CATCTTGGTTAGCAAATTCAAGGTGTAGGCGTTCGCTTGGTTTGCAGCGCTTGCCATGGC
GAGGAGCAACAGGCCGATAAAAAGGATCCGAAGGACGCAGCGGCGGGGAGCAGGAACCAT
TCGGCTTATAGAAAAAAAAAAAAAAGGGCTCGATGGAAAGAGAAAAGAAAAAGATGGGGA
GAGGGGCGGACGTTTTCACTATAACCGGATCCCTCGGGCATTATTTTTGCCATTGTTTTG
CAGAGGAGGAGGTGGATGGGGCGGGGCGTCCCCTTCACGTGTTGACTTGTTTTCCTGGGA
CCCGTCGGCGCCCTCGTGCGAAGACACGGCGGCACTGGCGCTTCCACCCCACAAGGACCG
GGAGGCGCCGCTGCCACTCGGAAGGCGCCTTGGCCCCGCGTCGACGCATCAGCACGCACT
TAGCGAGAACAACGTTGTCCTGCGGGAAGAGTCCGCAAAACCAAAGCAGTTCACGACGCT
TTGTCCGGGGGAACGAGCAGAACACAAAAGCGGCTTGTTCGCTGGCGGCGCATGCCGCGT
TTTCGAAAGGCTGTTTTCCGACGCCCCTTTCCGCCGGTGCCGAGAGGCCCTCCCTTTCCC
GACAAGGGGGGAAAGGGGCCGGGGGGCGCCCCTTTGCGACGCGTGCCAAGGTTGCGCGCC
GCCGCAGCGTCGTCCCGCACGGGCCCTTCTGTTGTTTTAATATCATTATTATTTGTTGCC
GTAGTGTCCTGCGTCGTACCGCATGAATGGGAAACTATTTTTTTTTTTTTGGTATATACA
GGATTAACCGGTAATGAAAAGTATTAAGCGTACCGGGTCCACGTTTCTCCGTTCCACCTC
TCCTCGCCAAAAAATAAATTGCCGCCATTTTTCTTTTGGAAAGCATTCGCTCGGAAAATA
CAAGATGACATATATTTTAAGCTCCTTTTTCTTTTTCACACTTTTCCCACCGTCCGAACG
GAAATTTTTTAATCAGGTTCCCGGTACGTCGTTAATGTAAGTGATAACGTTGTGATGTTA
GGGAAAGAAAATATATTAAGGATCATTTATTTTTTTTTTTTAGAAAAAAAAAACAGTTGG
TGACGGATTATCAGCAACATAATGATCTCCGGTTTACTTCTTATCTCTCTTTCAATTTAC
ATATAAAACCAAGTTTTTTTTTCCTACTTCTATCAAGAACAAAAAAAGAAATGAGCGCCC
CTTACACAGATTTGGATAATAAACCCGGAGCGGCAAGCAATCCAGTGGAGCCAAGCTTCA
CTTCTCTTGCTGCACTGAACAACAACAACGACAACAACAACACCAGAGAGGATCGTTTCC
AGCCGGTTGATATTACCGTCAATGACGACGCGACGAACATTGAAAATACCGTTGTCTCCA
GCAAGACCAAGCGCCTACTTCACCGCGAAGAAGATTTTTATACAATCGACAGGCTGGAGG
ACCAGTGTGAGGCCGTTCCCCTAAAACTATACGCTCCATGGTACTTACCCGCCTTTGCGC
TGTCGCTCTTTGGTATAATCCTGGTCATTATCAGCTTTTTCCTCTATACGTACGATACCA
CCGTCTCGAACCGCACGACCGTGTATATCGATACGCAGGTGGCAGAGGCGGTCTGTAACG
GTGGCTGTGACAACGCCAACGCCACTTTCATCTCAAAGCTCATTGACGGGCTGACGTTTT
ACGGCTTGTACACCACTGTATTCGACACAAAGGTTCTCGAGGCGTGGAAAGACGTCACAG
CGTCTTCAGCGGCACGTGACGTGAAGTGCACATACACTTCTTCGGACGCCACCTACGTGG
TCAATGTGACGTATCCCTCCAAAGATAATATCCGACTCACCTCTTCCATTTCTTGCGACG
CAAGCAGCGCTTCCGGCGATGTCCCCTCCGTAAGGTACTCCGGCGGTTTTATTGAATGGA
CGGGAACGTACAAGCAGGGCTCTCTTTACTATATATTTCCGTCTCTGGACAACAAGAAGG
AAAGCTTCAGCGAGGGGCCCGACGACTTTTTTTACTTTCCGTTCAGAGAGTTTTCCAGTA
TTATAACGGCGACCCAAGCGATGCTGTTCATCCTGTTTATACTCACCGCGCTGTTTCTCG
TCTTTGCCTTGATTGTGCGAAATTGCTGTTTGGTGAACAAGAAGCGAAAAAATCTGGTGT
GCTGCGTCGGCTTTTGCGGCCGAGATACTCCGCTCTGCACGTTGTCGTTTCCCCAAAACT
TCCTCGGTGCTTGCATCGGCTTTCTCGTTCTCTCCGTGATTATCAACATTTTTCTCAACC
TCGCCGGCCTCTCCGGCACAGGTAACCAGGAATACTACCGCTCGGACCTTTCGTTGACGT
CGAAGCTGACGGGGAGTTGGATTGCCCTCTTTGTGGTTCTTCTCTTTATTACCCAGATCG
CACCGCTGGCCCTTCTGTGCATCGGCTACGCGAAACGGATAGGGTTCTAACGAAAGACAA
TGATAGATTTAAGAATAATAATAATAAAAAAAAATGAGAGTAATAATAGAAAAAAAAAAA
AAAAACGCGCGTGTGATATTTTCTTTTTTGGTACGGAGGTTAAAACCATCTTTACCATTC
GGGTATTCAAAAATACTTTTTTTTTTAGTTGCTTCTTTCGTTGATATAATTTTCCCTTTC
CATTTAGCGTTCCATGAAATTTTAAGCCCCGGGTTAATTATATTAGAGTGTGTACTTTCT
GGAAGTGGGGCGTGGCGAGAAATAATGAAATCCACCCTATCGACTTTCCTCTCTCTCTCT
CTCTCTCTCATTGTTTTATATTTAATTATCAGCACGCGGCCGCTTGGTTTGGCGTGGGGG
AAAACTCCTCTGTTCCGGCGGGGCGCCGCCGCCTGTGACGGAAACGCGCGCCGCTTCCCG
TGCGGCTGTGCTTTTCCCGGTTTGTGCTCTTTGGCGGCCTATTGCCATGTCCTAGCGGGA
TCCCTAGGCCGCCGCCTATGGCCCGTTCTATTGGCGTGGCCGACGACCGCCCCGCTGTGC
TGCCCGCCGAGGATAGGGGCCCTCCGCCTGACCACAGAGAGAGGGAAAGGGAGAAGCGCA
ATGGGTCGCGCCGAAAATTGCCAAACGACGCCCGTCCAAAAGTTGTCCACCCGTTCTCCA
GGAATATCCCGCCAATTAATCGTCAAAATCCGCGTCTTGTTCGTCTCCGAACGCGATCCA
CTCAAGCGCTGGGCAGCGCTCTAGCCGCTCGACGCGGGGGACCGGGGTGCCACGGGCGTC
CACAGTTTTGAGTTGTGGCAGCCCCGACAAACCCTCCAGGCTCACCAGCTCTTTGCAGCC
GTACACATTCACGGTTTTCAGCGCCATGCACCCTGCCAGGCCACGGATGTTTTCAATTCC
ACTGCCGCGGGCATTCACGGATTTCAAGTTGCGGAGGCCGCCCAGGCCGTCGAGCGAGGT
GAGACTCTCACAATAACTCACGTTCACCGACTCGAGCGCCGCACATCCAGCCAGATCTTT
AATATTCTCAATTCTGCTCTGCCGAGCATCCACAGACCTCAGCTTCTCCAGTCCCGACAG
ACCTGCGAGCGAGGTGAGATTCTCACAGTAGCTTACGTCTACATGCTCCAGCTTGTGGCA
GTTTTCTAAAAGATCAAGACAAACGACAACACTGCTCTGCAACAGCACCTCCCTGAGGTT
TCGGAGTTTCCTCAACGGCTCCAATGAAAACAAATCCTCGCAATAGCAGACGGATAGAAT
CGTCAGGTTAGGAAAGTTCGAAAGGTGTTCCAGACCAGAGGCACCGACACATTGTAACAC
TTCCACGTTTGTCAACCGCTCAAGTCCCTCCAATGCCTGTAAGAGCGATAAATAGCTTTC
ATATAAGGTAATCTCCTCCGGTAGTGGTAGGAGCGCGGCGAAGGGCCGAAGAGACTCAAT
ATGCTGAAAACTCAAACCGAGCGTGTGTCTGACGTCGTTCTCGAAAAGGCGGTGTAAAAG
CTCCTCCACCTCAGGGATATCCTGCGATGATCCCCAATCGTAGAACTCGACGATAATGTG
CAGTGGATAGTCACGCTGTCTCATTGGCCACCACAGCAGGAGCCTCCACCGCACCGCGTC
GAACGAATCTATTCTCACCACGCGGCATATCCCGGAATCGTCAGCGCGGAGGGTCCATCC
GAGCATGCCCCGCTTGTGGCGCTCACAACACTCCCTGGTATGGGCATTGACACTCGCCAG
CGCAAGCGGCGGCGCCCCCTTAAAGTAGTCCGTGTAGTCCGAAATGATTTGGAATGGAAA
CATGGCTGGACAGCGATTTTGTAAAAAGAGTAGAAAAAACAACCACTAAACAGATAAGAG
AGAGAGAGGGACGTTGGTCAAATGCGTTTTGCCTTTTTCACTTTTAGCCGCCGCCCCGCC
AGTTTGTCCCGCGGTTTCACCCCCCTTTTGCCCTTTTTCATTGGAAATCAGCACAGTAAT
GGATGCGAAGCCATCCAGTGTAGCAGTTCAACTGTTATCGCAACCATCCCAGACAGCGAA
AAAGCTCAACCTGCGTCGGCGCAAGTATTTACCCGTATTTCTGACGGCGATCGAGTAGAG
GTCCTCACATGAACTAACACTTCTAATCGATGCTGAAAAAGAAGACACAAAAGGGGGGAA
AAATAATAATAATAAAAAATTAGAAGACTTTTTGAAACAATCCACTCAAAATAGAGAGAT
ACACTTTTGTTTTGTTTTGTCTAGTTTCATGTGCATGAAATCACTCTCCGCTTTTTTACA
TGGAGGGAGGGGAGGGAACATTACGAAAAAAAAAAAAAAAAAATCGCAAAAATAAAGGAA
AAAAACATAAAATAAGAATGCCTTTAAAGGAAAAGACTTGCAAATAATGACACTGTCACA
ACAAGGGAAACATATACCGTGCGTTTCACCGAACTGTCGGTCCCTGAACCCGCATATGGG
CACATTTCGTAGTACTCCGGGCAAACGTAACGTTTACCGCCGCTGCTGAAAGTTCCGCCC
GATGTGCAACGGATGGTAGACGAGGATAGCGCAATTTGAAAGGTCTTTGCGGAGTAGTCA
CAAACAATGTTGAAGCACTCCGCACCGGTGGAGGAATCTTGATTGATACAGCGACCAACT
GTGTCACCCGTGTTACGGCATATTGTGTTGGTGTAGGGCTGAATAGGGGGACAGTAGTCA
TATGGTGAAGAGTCATAGCAACGGCCATCGCCAAAGTAGTCGTATATAGTCCCAGCACAA
TTGAGATTTCTGTTTTCAGCCGAAGCCAAGTAACCCCCACCGACCGCCAGACGGTCTGAT
GAACAGCGAATTCTGTCGGTGTTACGGTCTGCCCAGGTGTCAGGAAAGAGGGAAACCCCG
TTTTGGATACACGGTTCGCGCAAAAAGTCACAGCCAGCCTTGTAACCAAACGGCATTGTC
TCTGCCGAGTCGTAATTGGGGGCATAAAATGTCGAATCTTCCATGTAGGCCAGCGTCATT
GGCGTAAGGTACATGATATTACTTGCATACCCCGCCATGAGATCATCCTTAGCCGCGCGG
GCTTTCCAGTGTGAACCCATCGTGCCCGCCCCACCGTCGTCGTCCACCTCCATACCTTCC
AGATCAGAGCAGCCGTAGTGCTCCCGGGCTTTGATTTTCGTCTGACCACTCGACACGACC
TTCACCGTCTTGCCTCTCATGGTTGCTTCGGTCGACTTCAGGCTTGAAAAGCCGAGGGCG
TGGAAGATCTCGTGGACGACCGTGCGAACGGTACTCATTTCACCGTTGATGTACTTCGGC
GATACATTGATCACGCCTACCATGGGCTTATTGGATTTCGAAGAAACGAGACACGTCGTC
GCCCAAGCGATGGTGTTACCGGAGGTGGGTGCAGCCGCGACCAGGATAATAAAATCTTGA
TCAGCCGCATTTTCAAGCTCTCGTGACACGATGAAATTGGAGCAAATGTTGCCTTCCAGG
TCACTTTGCTGCAAAGAAAAGGACCCGCTGGGAGTGTTTTTGAGGGCGTTGGAAATCAAC
GACGTGGCGGACGGCAGTAAATGGTCAATGAGGTATCGCTTCTTTTCGCTTGTGAATACT
TGTTCCGCTGTACACGTCAACGTTGAGCCTTCAAGGCTAGGTCTCTTCTGCCCCGCCGCC
GTACAATACTTGCTGCTGTCGTCCAACGTAGCGGTTCCGACGCGAAAGACAATGCCCCTG
GGAGACGCGCGCGACTCCCTTAACAAGGAGGTCTCTTCCACGATATGGTTTGCCTCCAGT
ACGCCGCTTTGTATCTGCTTTAATTGAATTTGGTCGTGGATGCAGTGGTGCTCTCCGAGC
ACGAGGGAGCTGAGAAGAAGCACGACGGCCGTACCTCCTACCCGGAGTAGGTGAGTGGAT
TTAGGTTGCATTGCTGAGCGATTGGTGTGTTAAACAAAGAATAGTAAAAATATATTCTAC
TATTGTCATCGAAAAGAAAATAAGAATATGGGGTCAAGGGAGAAAGTGGATGGGGGACGT
TGGGAGGGGGGTAGCACACGTTGGTTTCAAAATACCCCCCCCCAAAAAAAAAAAAAGGTC
CACCGAATGACTAATGTGTTGTAACTAAAAAAAATAGTATTAATAATATCACTATCCACT
CACAAGCGGGGAAGGAAAAAAAAAAAAAAAAGGCGCGTGGAACTTCTGTAAATGAGAGTT
GTGGCAGAATGTGGGTGTACTGTCGCATTAGTGACCCGTAGAACAAAAATACTACAATAG
TGTGTGTAAACGTAAAAATAGATTTTTTTTTGTTTTTAAAGAATTTGCACATTCATTATA
ACAGTGGTCTGTTTATATACATTGCCTCTCCGGCTTCAATTTATTGTTGCGACATTGTTG
AGCAATCATCTTCGATTTTCATTTCTCCTCTGTCGAAGTTGGGCGTTTCTCTGTCGGATT
TCACGGCAACGGTACGATGAGTTGACGACGATATCGTCCTCGTCATCTGAACCAGAACTA
GAATCATCGCTATACTCGTCTCCCGTTGAAGCTGAACCGCCCGACCCCGAGCCAGAGCTA
CCACTACGGTCTTCGCCTGTTGAGGCTGACCCGCTGCTATCCGTTTCCGAATCCCAATCG
TTTTCACCGTTAGAGTCGGCGTCACCAACAAAGAAACCCATACCACCGTCGACTCCCGTA
GGATTGGGGTTAAATCCGCCTGGCATCATCCCGCCGTAGCTCATCAACTCTCCCTGATTC
GTCCATCCATTGGAAATGAACCCGCCCTGATTCATCCCATCGTACATTTGCTGCATCGAC
ACTACTTACTCCCAGAAGAAGAACTAAAAAAAAAAAAAATAGAACTAGGATGACTTTTCC
GTTCTCCTGGTTGGGGGAAAAAGAGAAAAATGGTGAAGCAGTTTTATCAACACACACTTT
TAGAAGTAACGCAATAAATACAATCTGGTTTGTACTGGAGCAAATTAAATACATAAAGCA
AAAAGAACTAAAGAAATGAAAGCGAAACGACAGCTTTGGAAAATCATGAAAGGTATAAAG
AAAGGAATGCACCTTTTTGTACAAAAGAGTATAAAAAGAAGAGGAAAAAAAAAAAGGTAT
ACATACGAACAACAACAAAAAAATATACCCTTTGTTCCCGTCATTTTGGGAAGGGCGAGA
TGGCAGTTTAATACGCTGCCCGCTCTTGATTGCGCCTTCTACGAGTTTCGGCGTTTCTTT
GGCGAATCTCTCTGCAACGGAACGTGGTGTTGACTTGTATGGAGTTATCATCTGATATGT
CGTCGGAGTCCGAACCTGACTTTTCATATTCTTCGCTATCCTCGTTGCTATACTGACTTT
GAGAAGCGCCACACCCCATTTTCGCTTTTTGTTCCAGTACCGCCTTTAAAATAAATAGAT
TCAAAAAAAAAAAAAAAAAGAATAAATACAGTTGTATATGGTCGATAAAGCAAACCTAAA
GAAGTTATACAAGAGAGAAAGGGAACCGTATCACCTCGTACAAAAAGTAAAGATGGCGAC
GACAGCCGTCTACCAAATTGGAGCGCGTAGTCTCACGTCACAACCAAAGAAATTACTAAA
AAAATTTAACGAAAACACTCACACTAAGTGACGAATTACGGGAAAAAAATGGATTAAATG
GGGTCGCAAGCCCTCTATTTCGAATTGTTGCAGTAAGATAAAGCTATGCGGGGGAAAAAA
AAAGAAGAAAAAACGCGTATTACTTGTGGTGTTTCGGATGCTTCTATAGGAGGTTCAACC
TAGATCAAACGACTAATGTTCAGATTTATATATATGTGGGTTCATCCAAAAACAAAGATA
TATAAAAACAATAACAACTAAAAAAAAAAAAAAAAAGGGTAAGCGAAGGTAAAAGGGAAG
GGAAAAGATCCTTTTGAAGATGTTCACCCAGTGACTTCCAGGTATAGAACGGCACCACAA
CCGAAAACGAGGGACGCAACGCCGGCGATGAGCGTCAAATAGGTTGTCACGTAGTTAAAC
CACCCAACTTGCTTTCTATTCCAGTCTCCAGCGTACATGATGAACAGGGCCGGAAAAATG
AATCCAATGAAACCGGTACAGAAGCATCCGACGAGACTGAACCAAACATTGTCCTTGGGA
ATAAAAATACCCATTATCATGGACACGAGTGACATGACAGCGCAGATGATCAGATGAATC
CACATGGGCACGGTTTTTATGTTTCGGAAGGAATCAAAGTGGAATGACAGACAGTAATAG
AGTGAGTCACGTGCTGGCTGGAGCACTAGGGGGAAAATGAAGCACATTGCCAAACCAACG
AGGGCGTATCCTACGGAAATAAGCGGACTTTCTCTGATATTGTACGTGAGCAAAATATAC
GAAGGCATGTTCTCTCCAAACTCCAGGTAGGCAAATACACCGCAGAGGATGTACATAATC
TCCGTGATGGCCATCGCGACGGCTGTATCACGAGACATGCGGGCTGGGCTAGGAATTGTC
ATTTCGGTGTACAAGCCAAAGGTATCAATGTGACAAAGGTACGAAAACAACACCATGGAA
AACCCGACGATAGGGTCGTTTCCGGACTTGAACATGTCAATTTTGTGTTCAGGTTTGTTA
GGTCCCAGGGCGTTCATACAGCAGTGAATAATGACCATGACCACAAGATACCCAATGAAG
AGACAGGACAGGAGGGAGGCGTACCGCAGGGAGTTTATTTCTTTCGGCAGGGACAAGGGA
AACATAATGACAGCCCAAACCATAATGACCATAACCCGGTTACCCCATTCCGTTTTCAGG
AAACTGTTGACGCCGGGATCATCTGTCGCCGTGAGAAGCAAGGAACCCACAGAGATCACG
AAAAAGACACACGACCCGAATCCAAAGATGAACATGTTAAAGGCGGCAAGGTAGTCCCAT
CCGGGTCCCAACAAGGCGCGGGCAAGGGTTTCGAACGATAGGTAACAGCTCTTCGTTTTA
TCAACAGTACACATGAGAATGTACACGGAGTAAACAGTGAAGAAAGCTATAGCCGTGTTG
ATCAGAAGCGAAGTGATAACACCAGTTTGCTGGAAAGAAAGGGGAATGGCCATCACTCCG
GAGCCGAGGGAAACGGCAGTTAGCGTCACGACATTGGAGAAGGCCCCTCCAGCGGGAAGG
AGCTTATCCAAACAGCTGGTAATTTTTCCAGGTTGCTTGGAGTGAATTTCGGGAACGGCC
TCCGAGTCCATCTCGACGCGGTTACCAGTAGGCTCTTGGTGCGCGCCGAATGGCCCATCA
AGCAGTTTCACCGGTGAGGTGTACTGCGAGCTGGTGAACTCCTCCTCTGCGTGGGGAAAC
GGCTCAAATTGCATTCTCGATAAGTTGAATTATTATTATTGGTTTCGGAGTGGCGATGCC
TGCGCACACCGTAGAGTAAGAGAGAAAGAGAGGGAGAGAAGAAGAAAAGGTTAGGACAGC
AGTACCCGGCAGAGGGGGTTGCGGGGGAAATCCACCATAACCAGCGTAAGATTTGCTGTT
GGAGATTATATACAAGAACACAAAGGGGAAACACCCCGTCATTCCAGTTTCACTCTCTTC
TCCTCGGGCTCCGCAGAGGACGCGCTCTTTTCGTCCCCTTCACTCGCCACGGGGCTTGTC
TTCTCCCCTTCCTCAGGCGTATCCCAGCGGATGGACGTAAACTTACTATGGTAGCGGCCG
ATGGTGCGTGTGAGAAGCTCGGCGGAGGTAAACACCTCAGGAATCTCCCCAGTGCACGTG
ACCACCACATTAAACCCAATGTGCAAAAACTCTTCCCCGTGATACGTGAAAGATACTAAG
AGTGCCGTCGGTCCAGTTGGGTCTGGTATTTTAGAAACATCCGGCGGGTCGCTTTGAAGA
ACAAACTCGTGCTTTCCCGTCGTAAGAAAGGGACCCACTTCTAACTCATCCAGCACTTGA
TCGATGGAGAAATCCCAAATCGGGGACCAAACAAACTTGACATCAATTGCATCGTTTGGA
ACTTTTTCGAAAATTTCAATGACCACTTTCAGCGTCAAAGCTTCGCTGAACCCGGCGGGG
TTCGGTTCTACCACCGTCACCTTGCTCAACCCTACTCTTGTGGACATCAGTATTGCTCTC
TTTTTTTTTTTTTTCTAACTGTAAAAAGGAGACCCTTGAGAGACTTAAAAAAAAAAAAAA
ATCAGAGGAATCAAGGGGGGCCTTTGGTAAATTGACTACAAAGAAAAGGAGAGTGGCCGT
TGAACGCCGCTTTTTTTTTTTACACTGTACAGTTAGCGTGTGTAAACCGACAACACTTCT
GTTTTTTATTATTGTATTTTACCGATTACCTACTGTAAATATGGACTACCGAATTAACCA
CCACCCTCCCGAGACTACAAGACACCTGAGGTACTTCGGAGAACATCTGTAGTTCCATAC
GAATGCCATGGCAACACTGTTCCCGTACCGGGTTGGTTTAGATGCCACTTTTGGTGGTGT
TTCACAATGTCATACTCCTCTACCGTGGCAGGGAAATCCCGCGCGGTGGGTGGACGAATA
TAATGGGACAGTCGCCTGCCCGCGTCCGGGTGGGCGTATTTCCCCTCATCCTCGTACCAC
TGTGAGAGCCATCCCCGCTTTCTAGGGTTTGTGGCAAATGATTCCAGCCCTTTTCGTTCG
GGGAGGTCTTGTTCTACAAAAAGCGGGTACTGCTCTGGGTGCAGCTCCTGGTGGAGCCCT
TCGTGAGTCATGTACACGCAGGTGAAGGAGCCGCCAGATTCCTCGATCAGTTTAATAGCC
CTCGCTGATGCGTTTTGCAGTTCAATGTTGATGGGATAGGGAACCCGTTCCACCCCACCC
GCCAAGAGCACGAATCCGGGCCACAGAATTTCACCGTCCCCAATCACATTTGCCTTGCGC
AGGTGGAAAAGGGTGATGACCTCGTTCGGGTTGAGTCGGCCAGTGTCGATGGCCCACAGT
ATTTTGGAAAGAGGGATGCGAGAGAAGGTTGCCTTACCTTCATACCGGTTTCTCGGCCCA
CCGGCAGAAACGCGCGGCGCCAACATAAAACGGGGCGTCATTTTTCGTTCTTGCCACTGA
CCTTTCGCGTACCCCTTCCGTGCGTCATTGTAACTGCGTGCGTACTTCCAGCTTCCGCCT
ATTTTCATCCAACCCATTTTGATCATATTGTGACCGGAGCGAGGCCCGACATACTCTTCC
GTTGGTGTAATGTTCTTCCAGTGCTGCGTCAGTTGGGGGTTAATAAATTGATCCCAATGG
GAAAATTTATGCGTGGTCGTCCTTTCACTAAGTCTCGTACCAAAAACAGGCAGCTCGTGG
TCGGTGTCAAACGCTTTTCGTCCTTGGTAGTCCTGCCAGTTGTTCCGTGGTTTGGCTAAC
AGGTTGTTTTCGTAAATGAGGGGAAAGATGGACTTGATGGAGTTTAACTGAATACCCTGT
CGCACCGGGTAAAACAGTCTGTGCCGCTGTAGCGGTGTAGAGGACTTCATCATACCTTAA
TGAACTTGATCCAGACGTATTCAAAATAATAATAATAGAAGAAGGTGAGAGCAGAGAAAT
ACGAAATTTGAACAAACAGACAAAACAAAACAACAACAAAAAAAAAGAACAATACCACAC
AGACCCACCAAGATTCGTAATGATGGGTCAATGCAGACGACTGCTGTCTGTGCTAGGAGA
GGAATACTAGACATCGAAAAAAACAACAACTTTACATAAGTTTCACAATTTCAAGTGAGT
CAATCTGCTCCTTGATTTCCTGAAAAACGCCATTCGTGTCTAGTGTACCATCTATTCTCA
CATAAAACGGAGAATAGCACTCTATCAACTCATCCTTACGAGCGGCGAAATACTTTAGCC
GCATTCCGACGGCTTCCGGGGAGTCGTCAATTTTTTTGACCGTCTGGACCCCATCGGGTG
GTGGCGCGGACGCGGTGTTGTACGTTTTTCTGGTGTTTGGGTCAAAAACACGGGACAGCG
CCCGTTCCGTAGCGACGCTATCCGGAAGATCAATGTACAGGAATTTTTGTGGAGAAATAC
CCGCCCGCTGCAGATAGATGGACTGCGCCCGAGAGCGGGGGAACCCATCCAACACCCATC
CCTGATGGAGGGACTCGATTTCCTTAATGCGCTTTATGACTAGGTCCACAAAAAGGTCGT
CAGGGACCAACTTGCCCTCCTTCACGAATGGCGCTATCTTCTGGCCCACCTCCGACCCGG
AATCCACTTCTTGTCGGAGGAGGTCCCCGACGCTCAAGTGCTTTATTCCGTAGTGGGACT
CCAAAAGCTCGCACTGCGTGCCTTTACCACATCCGGGAGGCCCCGCAATGATTAGGCGCA
GTGGAGTGCGCTTTTCAAAATGGGCCAATAAGAAGGACAGCGGATCCTCCGGTTTTTGCA
TAATGACATCATGCATGGCTTCCTCCAAAAGTACTTTAATTTTGTTATCCTGAAAATACT
TTAACGAAGCATCGGAAATGTTTCCTGTAGACATCTGAGCTGGAAAATGATAAAACAACA
ACTACTACTACTACTGGTAACGGTTGTTTTCGGTGGCAAGGGAGAGAGAAAGAAAAGGAA
TCCATCACAATAACCAGCGACAAGAACAACCTGGCACTCCAAAACAGCGTTTACGGCACA
CCTCAATCGCCCTATTTAGACTTCTTAAAAAAACAAAATTCTTATTAGCATATAAAAAAA
GTAAAAAAAAAAAAAAGGAAGAGATCCCGTTAACTATCCTGCGGAGGAGCCACCTCGTGA
GAGTCCTGCTGCGCCTCCTGCTCCTCGTTCAGCTGCTGCTCCCTTTCGTACGCTTCCCAC
TCCTTTTCCTTCTGTAATCTTCTTTCCCTAAAGAAGCGGGCTTCTTCGATCTCCCGCTCC
TCCACAAGGTGCAACTGCTCGAGGAGTTCCTTTGCTTCAGAGAAACGTTGCTTTGCGAAC
AGTTTGGCGCATTTGGACAACCTTTTCTCCGTCAACGACTCACTCGACGACTCCCGCGCC
ATGTCGAGCCAAAATGTTCCTGTTTTATCCCAAAATGAGGCAAAGTCGTCATCGCGTTTC
GGTGTTGGGACAATAGAGGAGTCACTAAGTTGGGCAAGGAGCTGCTCCTTGTGCACCTGC
AGTCCCTTTTTCCCCTTTATCCTGGTGATCGCGTCCGCCACATCGCCATGGGAGAGCGTC
GCCCCTGTCTCATCCATGTTCGCCGGAATCGCCTGGGGCGCCTCCTCCCCGTCGTCTCCC
TCGTCGAGTTGGATTTCATCTGGGATTTCACCAAAGTCGACTTCATCGCGCTCTTCATCA
TCGTCCTCCTCGTCGTCGTCGTCGTCGTCAAGGTAGTCCATGTCAAACGCCGCGCTCACA
ACCGTGCTACCACTCTCCCAAGAGTTGTTATCGCTTTCCTCCTCTTTACCCACCCACATG
TTCGTGGACAAGTCGTACGAAAGGAGAACTTCGTATGTGTCGTTTCGGTTCAAGTTCAGT
CGAAACAGGTCCGACATGGTTATTTCCCTTCAGTCCACTTTCGAATTGGCCACCGTAAAT
GTATAGCGAGTTTCCCAAAATCGTCATGGCAGCGTCCATGCGGCGGTGCGGGTAGATGGC
CCCATTCTTCCGTGTTTCGAAACTCTCTTTCATTTCACAGTCCTTCTTCTCAACGCCATC
CTCGTCGTCAGAGTCTGTGTTGGAGTCCGAGCCACTGTCAGAGGAACTACCCTTGCCGGC
TAGCAGCTGAAGCTCTTCGAGCTCCGCCTCCAAGTCATGCACCACTTTCCTCGGGCCACT
TTGATCGTTTCGCTTTTTCCCAGAGAGGATGATCGGGAAAAACCGTTCAATATCCATATG
AAAAACGGAGAGGTCATTGCAGAACGTGGACATCACTTTCCCACCTGGCGACTCCACATC
CACCACTCCACCAAAGAGGTACATTTTCTTGTCCTTAAAGCAAGAGGACACACCCGCGCG
AATTGGAGGAGGAATGCCCCCAAGTTTTATTTTTCTCCACCGCACCGGGGAATCGACAGA
CGCGCTACCCACCTGGGACAAATCGATCATCCACAGGTCGTGGTGTACAGTGGCCTCCGA
CTTTTTGAAGCGGTTGAACTTTTCTGTAGAGTATCCACCATAAACGAACAGTGTGTTTTC
GTGCAGCGACAAACTATGACCACTTCGTGGACAGGGCCTCGAAAAAGAGGGCACTTCCAC
TTTCTGCCACTTGCCCACATCATCTAACTGCGAGAGGATCCACAGGTCGTCGAAATAGCG
ACACTCCTGGGCATTATCGTAGAAGCCACCGAAAACGACCGCGTTTCTTTTCCATAATAC
CATGCGGTGACCACTTCTCGCCGACGGGCCCCCTTTCAGCGCTTTTAACTCCTCCCACTC
GCTCTTTTGCGAGTCAAATCGCCAGACGTCCCTGAAGTGGTGATACTGTGACTGCGATTG
AGAAACAAACTCGCCACCAAACAGAATAATGAAGTGCTTGTACACCACCCCTTGCGAGCT
GCTCCTCGGCATGGGGTTCACTGGTGTGTTTATTCTGCTCCACGAGTTTTTTTTTGTGTT
GAAAATATACGTGTCATTGTATACTTCGGTGACCTCGCCGTTCCACAGCTCACCCCCGAA
CACAACAAGATCCGTGGGGCGCTCTGGGTGGGGCAGGAGAACTACGTTGACGCGTGCGGT
TGGTGGAGCCACATTGGGCACCTCTTCCGTTCTCTTCAACTTTTTCTGCTGCTTCTCAAT
TTTCTTCAACGTAACTTCGGGAGCCTCCTCATTGTTGAACCCGGCGGGGGCATCGGACTC
CTGCTTCCCTTTATTGAGCTTGTGAAGCTGCCGAGCCGCCCGCTTCACCGCCTTCTCAGG
GTCCTCCTTCTTCTTTCGTTTATCTCTTCCTTTTCCCATCTGCGAAGATGTATCGTTTCA
ACGCAATCTCTAAACTAAAATGTTCCTATTCGAATAATCAAAGAGCGACAGAAGGACACA
CATGTAGGATAGCGACGGTACAGTAGCTTTTGTAAAGGCAAAAAACAATAGGAGACAAGA
AAAATACAACGCCGAAAAAAAAAAAAAAGTATGCATTCATACATACAGAGCAGCGTTACT
GTTTGTCTGAGGGCCCCCCCTCGTTCTCAAAGTTGCGGTCTAAAATGATCTCGTTAGAGG
AAATTTCCTTCTCAAAAGCACTCTCTATGCTGGACAGCCTGTCTTCGAGAAAAAACCGTT
TCTCTCTCGGTATGATGTGACTGGAGTCATTCAGACTAAAGGAGTCCCAATAATGGTAAG
AAACGATATTCTTCCGTGTCTCTAACGTGACGAATAAGGACGGCGGCAAAAGACGGGCCA
CGGCAGTCCGGTGCATCTTATTTCTTTTCGTTCTCCTTTTCTTTTTTGTATTATTGTGAC
TTGTAGAGAACTTCTTTATGACTGAAAAGGAAGAAGAAAAAAAAAAAGAGTTTGAAGGAG
AATACTTTGTACTTTCAGACGTTTATGTGCGCGGTAAACATGGAATAATAAAGTTTTTTA
TTTTATTATTATTTGCGATTGCTCTTGTTCAATCAAGCAGAGAGATAACCACAACTTTCC
TACGCAGGAAGAGTGAATATCACTAGAAAAAAATAAGAATAAGAAGACACTTTTTTTTCT
TTTTTTTTTTAAAAAATAATGTGAACAGCTTACCTTGCCTTCGTCGCAAAAAGCTAGATA
TCCGGGGAGTCGCTGTGAGGATTCATCCCATTTACTAGAATATCATCCTCGAACGACTCC
TCGGCGTCTGGACTGCTTCCTAGTTTTGACGCAAGTAGTTCCGGTGAGTTGGTTAAGTTT
ATGTTTTGTAGGGCAACATCGAAGTCACCTAATACCAGCAGCAACGGTGGTTTGGAAGTC
GTGAAGCCCATTGTAGAAATTAACTGCAAAGACGCCCATTGTTTCTGGTCCAGAACGTTA
TTTGCGATCGCAAACCGTTTCATCATGAGAGCTGTCACCGGGTGATAGTATTTTCCGCGA
TAGTTGAACGGATCATAGCGTACACACGTGCTTGGGTTAAAAACCGACGGGTCCGCCGTC
CCACAAACGTTGTAGTATACTAACTTTGAAGTATTCGAGTCTACTCTCACACGGTGCTCG
GGGGTCAGATAACTTGGGTGAAAGGCAACATTATAGAGGTAGTACGCTTCATCCACGGTC
GCCCAGTACCTGCTGTTAGATATGGAGTTATGGTGGGACACAATTTCATTCTCGATCGTC
AGGGGAAACCTCTCCCCATTTGTATTGAGCGGAAAGTCGTTTGTGCCCAATGATTCCGCC
AAACACACCTCCTCCGCCGCGGAGTGGGCCGCCTTGTAGGCCGCCCACCGCTCTCGCATC
TCGCTCTCGGAGTGGTTCAACTGCAACCGATGATAATAAAAAGTGGTCTGACGGCAGCTA
TCAAGGCGGACCGGGGAGCCTGCCTCGCCCTTCAACTCGAGCTTCAAGAGGTGCACTACG
GAGATGGAGACCCACGTGTGTGGTGGTGTGTAGTGACGCGCCCTTGCAACCGAATTGAGA
ATCAGTGAGCTATGAGAGGAAAATGTGAACCCACACAATGTCGCACATTTGTTTGGCCGA
AGGGAATGCATAACCTGTAGCGTGTGGTGTGTCCTTTATTATTATTATTATTCAAGGGGG
GAGAAAGCACGGGGATTGGTGTCCACACGAAACCATTGCACACAATCTATATAATAAATA
ATAATAATAATAAAAGATTTGTATCAAGGCCGGATGATTTGCCATTAAAAAAAAAAAAGT
CGACTTTCCTTTCGCCTAGTAGTATATCACTTCTCCCAACTGAAATGCAATCGCCGCCAG
CGATGCAATGATGAAAAACAATATTGCTACAAGTACAAGAGGGTAGTACCTCAAACCGAA
GAGACTCGGCTCTGCGTCGTGTGTCGCCGCCATTAAGCGACATTTGGTGATGGTGCTACC
CGCTTTTTCGTCATGAAGGGTAATTTCGTGATAGAGGCCGACGACATCCATAATGTACAA
TTGTCGCTTGAACTCAAGCTTGGTCAGAACACAGGACGACATGTACCGAACCAGAAGTAT
CCCCCAAAAGAAAAGCACAAATAGTGCGTAGGAGTGGGCCGTCGAGTAATACTGATTGGA
TTCGTCGTAGTGATTTGCCAACATGTAAAACACATCGGCGAGGGAGACGATACAAACGGC
TATCATGGAAACCGTAAACACCCCCATGGCCCCACTCCTGGCGGCGTGGTTAGCGCACGT
CGACGCGTACAGTACGATGGATCGTGTCACAAACCATCCACAAAACCCCTTGAATATATC
CGACACGCAAAACGCCTCGTCCACATTGAACGGTTGCTTCGCGCGGATATTTGGATTGAT
GATGCTCTTCTGTTCAATAAATGCGATTTCGGTCAGCACTTTTAACTTGGCTCGTATTTC
CCGCTCCATATCCGTGAGTTTCAAGATAAAGTACGTGATGATGGAGCAAAACAAAAATGT
GGAGAAAAAGGCACACAGGGCAGCGGCCTTCTCAAACCCACCGGAGCCAAACATTCCGTG
ACCGAACCCACCCCTCGTGGACGGCGCGGAGAGACTCATCATGGCCCCATAGAGGACCGC
GAAAAAAAGCCAACGAAAGCGGTAGTGGTTGTTGCGCACTTTACTTCGTCCCTCTTCATC
CCACGTGTTGATGCACACACTGGCACGCGAGTCAACTACACTGGCCGCGAAAGCGGAAAG
TTTTGGGGTAAGGTTGCGGTCTAGCCGCTCTAAACTGTGAGGTGTTTGGATGAAACTGTT
GTAGGACCCACAGAACAAGGAGAGAAACAACCAAAGCACACATGGAATTACCATTTCTGG
CAACGTTAATTGACCCTCCTGGGCCGTCCCTAGCTTTACTTTGCATGCCACCAATACAAT
AGAAGCAATCTGGCACAGAAAGGCGAGTAAGATGAAATAAAAACTCCATTTCGGAGAATC
AAAGTCCTGTCGCAACGTCGCCCCACTCACAACGTAGTCCCGCTCTTGAGAGAGGGATGT
AACTTTACAGGGAGAAATGGGACACACCGGTAGAGCAAGAAAGGGGAAGAGAAACGCAAA
CGTCCTTTTTATGAATAGCGGATACGAAAAGGTTTCCCTGCTACTGGGACCAGCGCAGGC
GAAGACCGTTTCCACGGGGGCACTGCGGGTCAGCTCTTCGCGCAAATTCTTCTCTCGTGG
TGGCGGCTTATCCGCCGCGGTGCTAAGTCGGGGTCTGACACGCTGGCCCGTATAACGCCC
GTCGAGGTCGCTATCCTCGTATTGGTTTCGGTCTGCGGAAACCGGTGGTGCATTTATTTG
GGGCACAATAGGCGGCACACTACTCACACTGTTCGAATGAAACGGGTTATCCTTGTAATT
GCGAAAATGAAGGTGTACCTGCTTTATAACGGTCGAGAAGAGGTGAAAATGGGCCGCTTG
GGCCGCCGGTGAACTCGCGACACTCTCTTCACTAAGTTGCACGCCATTTTCCCAACGCCC
TTTAAGTTCCCTCCCATCTGTGTACAAGACGCCTTCGTGAATACCCGAGTTTTTAAATGT
ACCTACAAAATAATCACCAGACGCGAAGAAGACCGTTCCCGGACCCTCCATCTCGCCGGC
ATCAAACTCTCCTACGAATATGTTTCCGTTCGGGTAATACACCACCCCCAACCCGTCGCG
TTTTCCGTTGACGAAACGACCCTCATACACGGTCCCGTTGTCATACACATTAATACCTGC
GTCTTGTTCCATCGCGGTTTCTAGATAAATAAATAATCAAACCGAAAAGAGAGAGAGAGA
GAGACGCATTTATCCGGGTGGGCTTGCACTAAATCTGACATTTAAGACTGGAAGAGGATT
GAAAGCGAATAGGCCTCCCGTCAACACAATTTAGTCATGATTTAGGTAACATGTGTAGAC
AGATGAATATACATCTTCTTGTTGGTTTGACAGATTATGTGTGAGACTCACAACAAAAGA
AGTACGAGGAAAAAAGAAAAAAAAAACTACTAATCGTTTTGAGGAAACAAAGTAATGCTG
TATTTGAATACGTTTTTATGGTCCCGTAAACACTCTAAAATTATCTGATCTACACCTTTG
CCTTTTGTCTGGACAACAGGAGCTCCAAACCTCTTGAGGCAATTTGGTCAACAGACGCGA
ACACACGGCTGTCGGTGCTAGACACCTCCCTTGTTTTCAGCGCCTTATTCACGAGGTCCA
AAATAGTCAACACCGCTCGCTCTAAACAGAGTGTTGCGAGATAGACACTAAATATGTCTT
CTCTGCGGTTGCGGTCAAAGTGACGCATGTAGCCGCGCGTGTTGCAGTAGTAGTCCAGGA
TTTCGTTCGGCGACGGAAACATGAGGTGCACGCTCTTTGGAAACTCAAAGATGCCCTCGG
GCGACGGTAGGTAGGCGAAGAGTGCGAGGGCCGCCACGTCCATGAGTGGGTCCCCCAGCG
TGGTAAACTTAAAGTTCACCGTGGAGAGGAGTAGAGGAGGGTACTTGGGCCGTCCTTCCA
GAGATCGGTTCGAGAAGACAAACGCGCTCATATCGAAATGTCCGTGTACAATGACGAGTC
GCTCGGGAAATGGAACAATTTGGTGCACAAGCTGTGTTTGGTCGAAGCACTGCGTTAACA
TGGCAGCCAGCTCCTCCAGCTTCGACGAACGGATAAACTCAAAGCCTGGGAGCTTCGTGG
TGGAGATGGTTCGCTTGTAGCGCTCCATGGCGTGATGGATTCTGTTGAGGGCTGGATGGA
CGTGCGTGGTGGCAGTCTGCTTCATAAACCGCGGAGCAGGGGCATTGTGAAGCGCCGTCA
GTGCATTCAAAGCACCCCAGAAAAACAGCTTCGGCTTTAACTCCACGTTGACGATTCGTC
GCCGCTCCGAGTAGGGCCGTTGTATACGAGGCTGAAGGAGGGTTTGAATGTTGCTGATCA
CCTCCCCATCCACGTAGCGGCGAATGTAAAAGCGTCGACCACAGACCGCGTAGGAATCGC
AATAGAGCAACATGCCCGGGACCTTCACCGCCGGCGCGACAGCAGAGAGGTGCGACATGG
TTTCGAATTCTCTCCGAATATCGACGGAGCCGTAAGGGTTGGGGCCCTGCGGCTGTATCC
TCAGCACAAAACTGCCTGTTCGGAGTGTAATTCGGTACGACTCGAAGTATTTACTCCCCT
TGAAGTACTCAAAAAGGATCGGCCCAGCCGACGTTGCAAGTCCTGGTTGGGTTTTGAGGC
CCATGTTGGGAGAAGGCTGGTCGGGGATGTTCAAAGGAAAGAGGTGGGGGAGGTGCTGAG
CACAGTAGTAGAGAATGGCCTCCTGATCGTCCTCTCCCATTTGGTACTCCTTCCTTTCAA
GCGGGCTGACGGGCACGCAACTGTCGTTGTGCGGAGGAGGAATAAAGAGAAGGTTGTCCT
GATAGTTGTTCAACTCCCCCTCCACCCAAGACACGGGTCTCCCCTTCGCGTCGGTAGGCG
GCCGGAAAAGCGGCGTCATGTCTCGCTCCACGCTCTCCACCACGGACTTCCAAAACACGT
CTTTCGCTGCGACGATTTTGAGGGCAGCAATGACGTCCTTGAACACGTCAGCGGCGCCGT
CTTCAATGAGGTAGGCTTCTGTAAAGGGATTCCCGGGCAAATCCCTCGCCGCCTCGCAGT
GGTCACCAACGTCGTCAAAGTAGAACACGAACGGTTTCAGGTCGAACCGCAGGGCGTCAG
CCGTTGGCTTCCGACACTCTTTCACTTGCTCCAGCGCTTTCATAAAAATGTCAGGATACG
GTTTGCGCTTGTGGCACGTATAGCTGCGCACATACCCGTCGAAGAGCCCATTCACATTAA
ATGTAGCCTTCCGGGAGGGTCCGTCACCGTAAAGAACGGGGCAGGTGACGGGAAAGACGG
AGGAAACAGAGTCCACAACCGAGGTGGTCGCCTCGTGTAACATTCTCTTGTACTGCCCTT
CCGTCTCCCAGCTGTTCCCCATTGCAAACAGCCGAATCTCCTGTTGACTTTTAACGTGTA
AATAGTGAAGCAGATTCAGCACGTTCTTGCGGGGCGACACCTTTTCAATCGTACACAGAA
ACGCCTCCACATCCATAATTTCATACACCAGAGACTGTACAATGGGGTCCACGAGAAGGG
GGAAGCGCTTCTTGAGCGACGCCACCCGTTTGGGGTGCGATATGCTCATCCCTTCCAATT
CTTCCATATTTTGCTTTCCAAGAGCGTCCAGCATAAATTTCATCTCCAGACGGTACTCGG
TCACAAACTCCACACGGTTGATTTCCCCCAGCTCCAGCCGCTCAAATGCACTTTTAATAC
CGCGGATGCGTTCCGTGAAATCCGTTACGGTAAAGAAAAAATTGCAGTACTGTCGGGCCA
AAAAGCGGACGGACCTGTTTTTCATTTTGGCCGCCAAGTGAGAACCAGCCCTTGTGAAAA
TGCACGACATCATTCTCTCGGCGAGTCTTCGGGCCGCCGGAAAAGGGGACGAGGAAAGGA
CCCCAGACAAGTCCATCATTAAGACTACTTCCGCAGGCATCGGCTCTCCGTCGTTATTAT
AATGTAATTAAAAAAAAAAAAAGAAAAAATATTAATATATATATACTTTTGTAAGGGGTT
TCTAGTTTGAAAAGCGAGGAACGGTGGAGGTGGAAAAAGTAAAAACAGCAACAATAACAA
ACAGGCTTAAAAAACACCAAAGCGGCCGCGGGCCAATGATTTTTTTTTTTTTTTTGCGTT
TGTTGTTTAACAGCATAAGCCTGTCGTCTCGGAACACTTTACAACCGGAGTGTTGTTATC
ATTAAAAGGTGACCACCTCAGGATGAACAGTGCCTTGGATAGAAAGACAGATTTCATTAA
TTAACGGAACGACATCTCCCGGGGGACTATCCAGATAATGAACCGTCTGCAACCATGGCT
CGACGCGGGCGGACATTTGGTCACGGCTCAGTTGACCGGAAGACATTATCTCTGCACACC
GGGACAGAATACCGAGACACTGTCTCGAGACGGGGCGGTAGTGCCGCCTGGAGGACGTGG
TAGAGTAGTTGGCTCGATAGACAAAAAGAGCCCTAGCCACCGCGGCACTACAGGATCTGC
TGTTCAAGTACCACTCGGCCGTTTCGCACCAAAAGGAAAAGGGCAGCAAAAAGCAACTGG
CCTGCCCGACAGCAAGTTGTATGCACTTTTCACTGCACTCCGATTCGTGCACACACACAT
CTGAAGCTGGCAGGGCCTCTACTATGTGCTGCACAATAAGACCACTCAAGCGCTTCCACT
CGTTCCTGTAAGAAGTATCCTCCGTGGTTAAAGGCTTGCGGGAACAGAGGATGCGCAACA
GACTGCAAAGAGAGGCTTTTTCCCGCAAGTTCGAAAACCGAAGGCGGGATAACACCACCA
ACAGCTGCATTTCTAAACTTCTTGCAAGTTCCTCCTCTACGACTGTACTTAAATGGGTGG
TATACACCGTTACGGCCATCTCCACCAGAAGGTCTGGGTCAATATCATAGTTGGGGGTAT
AGCTGAGGACGTCGAGAAACTTCCGCAGCGCCTTGCTGTGCAGGTGAGACTGCGTGGCGT
TTTGAGAACAAGCGGCCAAAGTGACAAAACACCGCTGCAAAAACAGGGTATCATCGCACT
CCGTGAGTGGTCTGCGAATTCCAAAGGCGTAATGACCCTCTCCACCGTCACCGACCCGAA
ACACGTTTTCCTTCTCCCGTATCCCTAAAGAGCTTTTTAGCAATGCGGTGATGAAGTCGC
AGGACTTGGTTACCAACTGGATCGCCGTGGTGTCAAACGGGACAGAATTGCGCTTGTACA
CACAAAGCAAAAAGTAAAGGTGCTTCGAGCTGATTACTTCCCCGTTCTGGGGCGCCGAAT
AAAGACACGACCGAAGGTCATTGGGCAGGCCCTCTTGGACGCGTGCCGCCACTTGATCTG
TCGCTTCCCGCATGGCCGACAACCGCACCAGGGGGGCGGTAAGCACGTAGAGGAGCTCCA
GCTTCTCTTCTAGCGAGAATACCTCTTGCACTTCCTTCAATAACGCCGAGGCCGGTACTT
CATTTAATGGGCTCAGTAGTGCATTCACCGTTTTTTCCATGGTAGATACTTCATCCTCGC
CAGAAAATTGACCGTCGCCGAACTGTACCGCCCCGTTTACAAGCTCTTCGGCGGACAGCA
TTAAGACAGACGCACAGTACACGTAAGAACCTAATGTCACCGTCTCTCCCAGCTTGGCCT
CGGATAGACGGCGGAAGAGCTGCCACACGGCGTATCGGTGCTCCTTTTCCTTCTTTTCCA
TCCCAACAATGGAAAATTTCCCGCTGCGCCGGGGCGTTTTCGTCTCCTGAAAGAGGAAGA
CCGCTTCGTGGAGCAGTTGCTGCAGCGTGTCACCCGTTTCCTGCGGCGCAGATGAGCCAC
GGTCGGTGGATTGCCCTACTTCCCCATTGCGTTCATCCAAAAACTTGATACGATCCAGTA
TGCTGAGCTTATTTTGTTGCTTCACCTTTTCGTCTAGCTCCCGACTCCAACTGGTGGGAT
CGTATGTGAAGTGACGGTGAGGACGGAATCGGTGCACTTTATGCCACTGAAACGCATTTT
GTCGGTCTTGAATCACCTCGTTCATTGTCCTATCAATATTTTTAGTACTCGAATGCCGAG
CGCCACAAGCGAGCGGGACCAACGCACCGATTGTACATTTGCGCATCCGGAAATATCTTC
CGTTGACACTGTGTGTGTATGTGTGTGTGTGTGTGCTAAACCCGTTGAGACAGACCGAGA
AAGAGAATGAGAAGGGGTATAACAAAAAAGCCATTTCTTCTTTCGGACTCTAGTGAGAAC
CCAGGACAAATCTCTCCAGCGGGTGCCTTTTATGTTTAAGGAGAACAGAGTGTATGCTCA
TTTATATATTAAATAATAATTAAACGGCCTAAAACAGTGTTACGAAAGAAAAAAAATTAA
AAACCTGGTTTAGGGTGAACAAGGCAGAAGACGTCTACAAGTCTTCCAACTCCGCGAGAG
GGTCGATGAGGGCAATTTCATCGCGGTTGAAGTTCTTCTGGTCGTCCTCTTCTTCCCCGC
TTTCGTCTTCGTCGTTCACGAACTCGTAGTCGGCGTGCTCTGCCTTTTCAGCCTGGCTGA
AGTCACGGGGAATGACGTTCGTCTTCACCAACGTGCGGACTTCCGCCGGCGTAAAGCGGT
AGATAATGTCTACGGGATCGTTCGCATTAAACTCTCGCTTGGAAATAAGAACAACGTCTC
CTGGTGTCACGTACACCTTTCGGACCATAGCCCCTCGAATGTGTCCAATGACGGTCGTAC
CCCCGGCTAACTGGAGCTCCATGTTAAGGTTGCCCAGAGCCTTTTTGACGTGCGCGTACT
CTTCACCTTCCTCCGCGGTTAAAAGTTCACGTTTTTGATTGTGCTGATTGGACTTGGAGT
TACCAGCTTTAAAGGACTTACCGCCCTTACCCATATTCTTAGGCATTTTTAAAATAAAAA
ATAAAAAGAGATTTACTTTGACGAATCCTACTTGTAAAGATGAAATAGTGATGTGAATGA
GACAGGGAGAGGTTTGGATGAAATGAGAAGGTTCTGCTGGAGACAACAGCGACAACAACA
GCATCATCATGGAGACGGAAGGGCGGACTCATGAATATACATATCAGCGAGCTACATGTA
AGAACGGTGCGCCTCCATGTAATTAAAGTTTGTAATGCGCTTAAGATCGTCGTGGGTCCA
GTGCACTGGCAAAACGTTTTCGGGACTATTGTTGCCAGCGAAAGGGTTCTGCATGTCTAG
CGCACGGGATTGGTAGCTGAGTTCATTCGCACCGGGCTGATCGCCATTACCGTATGGTGC
GTCGTAATACGCTTGGGGCAGTTCTATACCCCTACCGTTGCCGTAGTTTTCCACAGGAAA
CGGATCTCTATCATTTGACATATTGTTGAAAGGCTCCTGCGCGTATGGTGCATCAAGATA
AGGGGCGCCAGGGAGACTAACTTGCCTTGACTGCTCTGGCTCATTTTGAGGGGGGTTTTG
ATTCTGTTTGTTCGCATTGTCAAAGACTCTGTGAGAATTGGGAAGCTGCTTCCAGTCGTA
CTCTAGCGTTTGAAGGTTGTACTGAGTTGGCTTCCCAGTAACCTCTTGGTTTTTCTTTCT
CATTTAAACAAATAGGCAACCTGTCTGTACTGTTGTCCGAGACAGAGAGAGAGAGAGAGA
GAGAGAGAGAGAGAGAGAGAGAGAGATAAAGCGAAAAAAAGGACATCGACCACCACATCA
AAGTGTGCCAGCCCAACCAGAACAACATCAAAAAAGTAAAAAAGAAACTAAATACTGGAC
TATTTGTGTTATTTCAAGTGTAGTTAGAAAGTATGTGGTGACTAGTATCAACGACACGGG
TATGTGTTCCTATTAGTTTTTCGGAGGGGTACCTGCGGAGCCGTCCTCGCCGGTTGCCGA
GTACCCTTCGTCGTCGAGGTCGAACTCCTCAAAGTCCCCGGTGTTGGACATCATCTCATT
GTGCCACTCTTCCTCCTCCTTTTCGGACCAAAGAGGGTCGACGTCACTGGGGTGTGGAAC
ATTACGCACACCCCAGTAGCGCAGCTTGGCGTGGCGGAGTCTCCACCAATGGTGAAACTC
CTCCGTCTTAAATTTACTAGCCCAACGGTCGAACGCCATTTGCATATGTGGTGGTCTCTG
GATACCCTTTTCTGTTTCAATAATCCTCGGTGGTAAGAAGAACCGCTCCGGAGAAGAAGA
ATAGTCCTCACCCTTGTGGTTGTCACTCATCTCTCTGTTTTTGTACTCTACAAAGAACAT
GGAAACGTTGTCTGCGCGTCGCTTCCCTTTTAACGGGGTCATCATCGCGTATTTACCAGA
CATATCCTTAAAGCGGCGCGGGTACTCGTCGAACGCCTTATCGACCATCAGTGGGTCGTG
CAGAAAATAGGCTAAGTGCTGTCGAGAATCTGTATCTCCCGCTTTGGCGAGCTCTACGAC
GTGGTCGGCGAGGATTCGCAAAGCGGGGGCACGAGCCCCACCAACAATCACATAATCCTT
ACGAATGAGCTCCGTTACCATTCGTCTCGCTATTTGCTGTCTGTGAAACGGACTTCGGGC
GCGGAACTTGGGAAGTTTCCCTCTCACCCACCCGTAGTCGGCCATCAGCGGCTCCTTGGT
ATTCCACGGCTCATAGGAAACACCAGGGTTGTCGTCCACGCCGGCAAAACGAGCCTTTTT
CGTCATCCCTATAACCGGCGGAGGCCTACCGAAAGAAAAGCGTGTTACCTTTAACATTTA
TAGAGAAGTACCCACGTCTACTTTGTATCTGGTATAGTTCTATTCAACTTCAGACGAAAA
AAAAAAAAAAAAAAAGACGTGGGGGATAAGTGACATTTGTGGGAAGAGCGGGGAAAATAA
AATCACAAAACAGTGCATTCTCCGACAAAAAAAAAAAAAAAGAACAAATTTTGTACAGTT
CAACAGGTGAAACACTTTTTTTTTATTTTTTATTTTGTACATTGAAATATATATCCGCAT
GGGAACGTGCTTGACGGTGGCTAAATCTGCTCTTTCGTCCGTTCACTCGTAATTTCCGCA
AACTTGTCCAAAAGTCCTTCGAGACCATCGCATAGTTTACTGTTTAACACAGTTGGAAGC
ATTTTTTCGGTAATGCCAATCCAGTTAAGAATAACCTCCGTGTTCACTGAAACGTCACCT
CCGAAGCGGAGCTGGGGGGAGAAGTTGACCCCACGCAGCGCCTTCAAAACCCTAGGATCC
GTGGCGTCCACGTGTATGGGTATCGGTTCCTCCTCATCCACGGCCGGCGCTTCGGACGCC
GCTTTTGAGGGTGGTACCTGCGCCGAATTCGCATTGAAATTCGCATCCACGCTGCCAAAC
TTCTGAAACACATCCGCGTTCTTCTTGTCGGCAAAGGACTTGATCAGTGAGATCATCTCC
TCAAAATCACGAAAACGAGGGTTCCCCGTCCAAGGGTGGGTTTGCTTGAGCAACAGCGTG
AAAAACACATCTGCGCTTCCCATTTCTTGCTTGGTGAAAAACTCAAAGTAGTTATCACCT
CGGAAACCCATAATGACAATCTTGTAGGAACCAGGTCTGTAAAGCTCCACGTTTCGCGTT
TCAATAATGAGCATCTTTTTCGCCGCCGTGTAGTCGTCAGAAGGGCATTCGGCGAAGGAT
AAGCGCGTTTTCGGAAAGCTGGCCACCACGCAACCGGTGGTAGCTTCAGCGGATGAAATT
GCGCCCAGCAATAGAGTGGTCTCATCCACGGTAAACCGCAACTGTCCACACGGAACATGC
GTCAGACGATTTCCAAAGAATGGGATGACGGGCACGTCCTTGGGGAGGGAGTCGCGAGCC
GTTGCCGTGTCGGCCTCATTGAACGGCTTTTCGGACTCCGGAAAGCCGTCTCAAGACGCT
GTTGTCAGCCGAGGAGCGACGGCTCTCCCAGCTGTACAACACTTCTTTGATTTGCGTAGA
GATGGAGGCCAGACGCCCAACGGGTACCTTGTCTTCTTTTAGCTTCTCGTTGGCGATCCG
TTTCTGGTCGGCCACCATAAAACTGACACTCTTGATAAAGGTGAGAAATGCCGGGACGGT
ACTCGGGGTGACGCCCAGGGTCGCTCGGGAGAGCAAAACATCCAAGTCTGACGTGGTGTA
GCCATCCACCCCGACCCCATCCATTGAATTTAAATCAAATAGCGTGCTCTTGCATTCGAA
AACGTCCTTTACCTGCCGCTCCTTAAAGGCGACATGCACATTCTTGACGATAACCCGGCT
TCGGAAGGTCCTGCTTTCGGGGGAGCGCAGAAAGGTTTCTGAGCTTTCCATGTTTTCAAT
GACAAAGCCTTGGGCAATAATATCACCAATACTGACGACGCCGGCCAGGACTCCCTCGCT
TTTGGTAGAAAAGTTGGAAATGTGACATCTGAGAAGATTCACACCGGAGTGACCTCCACA
CACTCTCTTTTCCGCCGCCAGTCGTCCCGTTCCAAACAACAGCTGGTGACTGTTACCTGT
GCCGAGGTCAAAGTGGCACAGCCCGTAGGAGACGTAGATGACAACAAGCGTCCGCTCATT
GCCGTTGGTCTGTACAGGGGCAGAGATGGGCTGCGGAACTGAGGGGAGCGGACTGCTCGC
CGACAGAAACACACCCTTCATTTGCTCTAACGCCTCACCAATGACACTGGTCCACAGCTG
CTGTATTGTGAACACCTGTGCAATGTGGGGAACGCGTAGAATAAGATTCGGGTCAGTTCC
CTCTACATTGAATGGTAAGTTCACCGCGATGGAGTTCACCACGTCGTCGTGTCGTACACG
CTTGCTGATAACCACCTCGCCCTCCGGTAAAAACACCTCTACCGACTTTACCTCCAGCTT
TGTTTGACACTCCGCGCGGAGGCGCCTCACATTCATTATGATGGTATTATCCGGGACGCG
ACTTAAGACGGCGTGGCTACCACCACGGTACACTTTGACCAGTAGATCGACACTTCCGCG
GTCACCCAAGAAGACGGTAAGGTTTGTTGACGCCACCGGCTCCGACGTGAGAATCAGGGA
GAACTCTAGCAGACTTAAATGGATGCTCAGATACGACGGTTTGACGACGACAGAACGTTG
CTCCCCCTGACAAGGTTGTCGCGGGGGATCGGCTCGCGTCTTTCGCTTCGAGGTGTACTG
TCGTATCTTGCTGTTGAAGAGCTCCGTCGCGTAGGCGCGCGGGACAGGAACTAACAGGTC
CGTCACAGTGCAGTGCAAGGCAATCTTCTTCGAAGTGACACCATTCTCTATTTCCTTGAC
CTTTTGAAGAATATTCTTCTCACACTCTTGCTTGTGAAACCCATAATCGCTGGCCGCCTG
CTCAATGTCTTTGAAGAATCCGATGATCGACGGGCCAATTTCAATGCTACCAGACCGTAT
CTCACAGCGCACCATCGATACGTCCTCTTCATTCATGTCGGTCGACCGCTTCGCTGCGAT
TTGTGTCACAACCGATGGGAGAGGGACGGTCAACATAAGATTCATGTTACCCTCCGGCAT
TCGGGACTTCCCCCCGAACGCAATGTTCTGCTCTTCCGCGGGGGTGACCACTCTCGCCGT
TTTGTTACCCTTCTGAGACTTTCTGCTGCTGTGCGTAAACTTTCTTGTAAAGATATTCTC
ATTGTCATTTACCGGCTGACTTTCCTTTTTACCAAAAGAGAAGAACCGGACGGACCCAAT
CCCTAGACGCGCGCTCACGTCCAACACAAAGTAGTTGTTTTGGGCGCTGCTGCTGCTGCT
CCTCCTCCTCGACTTCCCTGGTTGGACCGGTACGTTTTCACTTGTCGCGCCTTCGTCCAG
GTTGGCCGACATTTGAGAGGAATCGCCCCTCGCGTGGGGCAGTGATGTGGTAGGGAATTC
GTTTTGCAACTGACTGACAAAAATGGGAAACCGCGACGACAGACAAATCTTTGGCCCGGA
TATATCCATGATCGCCCCAATGGAAAATACGCCATCCTTTTTTTCAATGTGGAAAGGCGA
CTCAATGATTTCTATCAAAATAGTGTTGCGAGTTTTCTGTATTTCTTCCCTGTTGTCCAG
CGTCAAAATGCCTACACCACCAAGCACAACGGTATCTTCGAGTAGTCTCTGCAAATGGGA
GGTCGATGGGATCGGACTGCCCGTCGTGAAATAGGCCACGAGCTTGCTGGAAAAAAGGCG
GCCCGTTACCTTTAACTCGGACGTTAGGAAACTCTTATCTACATCACTTAACAAAATGGG
GGCAAAATGCCGCACACTTTCCACACCACAAGTAAATGTGATCTCGTCTATGCCAACACG
AAGGGCAAGGGTCGGGAGTGTTTTCTTCCGCAGGATGCACGTGGCGTTGTGGATGTGCTT
TGTGTTCTTCCCGCAAGAGAACATTTTCGGATCCTCCTCCAGAAGGCTCTTAAATGTGGC
ATCCCCGAACGGAACCACAATCAAAAAGTTGGATATGGTCGTAACAAACCGGTGCTTGGA
CGTTATGCGCAGCAGTTCAAGAATGTCACTTTCCTCATTCCCAATGGCGTTTCGCCGTCG
CAGTGATACGTCGCGAGCCACTCTTTCAGCTACCCGGCGAACATTCTCGGCGTGTTCCGA
CTCATTCTTACGGATTAGCGCGTCGTACCGCCTCTTTTGAGCCTGTAGTTTCTTGAACGT
CTTCTCGTTGCTCAGCATCATCCTAAAGCGTTCTCCCTCTTTCGTGGCGGCGTTCTTCAA
CTCCCAAATATCCGCCTGTGTTTCGTCAAGGCACTGCTTCAGAAGGGATTCCAGCCCGAC
GCGCAAAATGACGAGGGGGGAGTACACCGACAGCACCCACCTGTAGGTAGAGTGCCCCAC
CGTGTCCAGCAGCGCCTTCTGAAGTTCGGGCGAACAGGCCTGAAAGGAGGCCTCTTTCCG
CAGCGTTTCCTGCACCTCATTGTTGTAGTTGGTCATATCGCTCGAAAGGGTCAATGAAAA
CTCCAAAGACCCCCAAATAAAGCCACCCAGAGGCGTGTGGGGTTTAGATGCTCCACCAGA
CTTTGGAGCATGCTTATGCAGAGGTGGTACCAGCTTGGAGCGAGTTGTCATTTGGTCGTG
GTCGTCGCGGTCCACCAGCGCCACCTGAAGGGTCGACACGTGGACCGTCCAATCCAGCAC
ACTGAAACCGGTCAAAACGGAGGTTTCCGCCGTTGCGTTCAGTGATTTTAGAGAAAAGCG
CAGGTTCGTCATGGATGTGAGATACGAAAAGCTCAAGCCTCGTAACAAAAATAGAAAGGT
CTGTCGTTTCCCCGGCCGCGGCGCCGGCTCTCCTCCGGTATTCGTGGCGGCCCCCTGACT
GTTCGTATGGGGGATAGTTTGCTGAGTTGCGACGATGAGTTCCTTCATTTTTTCAATCGT
CAGTAGCGTGTGATTGATAAACAACGGTGTGACCGTTATGGCGACAGTTTCGACCATAAC
GGAGCAGGTCAACTTGATTTGATCGTGGGCGTAGATGAGGTACATGTGGGGGAGCGTCAC
CTGGTAGTTGTCCAGCGTGTTCGACTTGGAAGTAATGGAAAAAGGGTGTGCATGCACCTG
TGCCCCAACCCGCCCGTTAGAGGACGTCTGCACAATAAGACTTAACTGCGGAAGGAAGAA
CTTTTGCGAGATGTTTTGCGGAAGTCCTACAATACCTTCAATGTTCTTTGCCTGTATGCT
CACGAAGAGGCCCGAATTGCTGTTTTGGTTCCCTTTTCCGGTACTCTTTTTCGGCGATTG
TGCAATGACGGTGGTTAGCCCGTCTGTGTTTTGACTACTGAGAGCGTGGGCGGCCAATTT
CCACGCCGTAACGATTTGCTGTATTTGGGGGTGCACCGTGGACGACGATTCTGGGCGAAA
AGGCGACACACAGTACACTCGGTGGATCGAGACTTCAAGGTTGATCTGCTTACCGACAAT
GTCGAATTGGTCCGTGAACTGTGCGGCGATGGCCACTTGGTCAATTGCCGCAATAATCAC
CTGCGGGTCCACTCTCGACGGCGTGTCGCCGGTGGTCAGCTCCTTTGGCAGAATGACCTC
CGCAACGTACCGGAGTAACAGCTGCTCCGCAAAAAAAGATGCAGTGGACCTCAACTGTAG
CTGACCCGTCACCGAAGAGGGAGACGCATACCGACTTTGGCTTGCCCTCTCCCGCGCCGC
GCGCGCCTTCGCCCGCAACCGCGCCTTTAGCCTCTCCGATATCGCCTCCGTCAGCACGTC
AACCTGTACACACTCCCGTGAACTTAGTCTATCATTTCTTGCTTCGGCACAACCTGTCAA
ATTTTTACCCCGCAGTTGCAAGTAGTTCATCGCCGAATGCATGACACTGATATCGAGGGT
ATGAAGTGTAAATGTACCAGTGTAGAGCAGAAGAAGCCCAGATTCCGTACTTGGGAACTC
GCTAGACTCCTTTGTCCCGCCGTCCATGTCGTCATTTTTTTGTAGAAAGCGCGTTCCCCC
CTCTAGCGATGGAGTATTAATGCAGTGAAGCAAGCTAGGGTACAGTTTGATTCGGAGTGC
ATCCACGTCCCCAATAAACTGCAGGTGCAGGCAATTGTCTCGCGTGGCGCGCGGGGTCAC
GATGACAAAGTTTGCCATTGTATTCGACACCTCGAAAACAGAGCTGGATGGAATGTCCAG
TTTGATGTAGCGTCCGTGCTTGAAAGAATTGATCATCACCACACGAAATAGTCGAATGTT
CCCTTTCCCCTGAACCGTCCGTCCCCGCTCCGTCGTCACCGTTCCCTTATGAAACGAGGA
CGAGGAGATCATCTGCGAAGACCGTTGCGCTTCCAGCGGCGATGACACCCCGCTCCACGT
CTCCGAGTAGACCCGCTGCATAAAGTCGGTCCTCATCTCATCCGCCATGGCAAACAGGGA
AAGCAAGTAGGAGATATAATCCTTTGTGACGTGAATCCCCACCGTGTCCACCAGCACACT
GCACGCGCCTCCTTCCGCACTCCGTACCACATCTCGCTTGCCCCGACCCCGAATCTTGGC
AATGTAAATCACGCCAATGTTGTCCTTACTCTCATCATACACAATAAGCGGGGCATCCAC
CGTCAACTTTCCTTCTCGGGCGATTGGTTCGTCCTCGATCTGCGTGACCAGCGACAGACA
CTTTAGCGAGACGGACGCTGACATTTTCCGGGACGACGAGGAAGCGCTTTCGACCCCCGA
TGGGGGGCGGTTGTAGCGTAGTACGCCATTGATGCCGCGGATACCCAGCGTGGTGCTGTA
CATACCGTTCTCCGCCTTCTCAGTGGGCAAGTTGTACGAAGGAACCGGCAAACAGGTCAT
TAGTTTTAGCTCCACACAGGGAATGATGGCGCTCGCCAGAATATCCTCCCACTGCCACCG
CTTCTGCTGTTTCCTCACCGTGCTCTTCTTTCCTTTTTTGGTTTCTCGAATAAAACTAGT
GGGTTTGACCGACATTTGACCGTGCACTTTTTCGTCAAAGTCCGCCGTGCGTGTCTGCAT
TGTGGCCAACGGGGCACCCCTCGCGCCGTACTTTGCCATGACCACCCGAAGTGCCGCCGT
CACCAACGGTGAGAATTCTTTGGAGACCAACACCGTGAGGGGCTCCGCGAGCTCCAGGTG
TAGGTGCTTCGTTGTAGAACCCTGTAGGGATCGTTTCCGGTTGTCGGCGCACCCGGTGGC
CCACGAAAGTTCTTCACTGTCGTCGCAATTCTCATAGAACTCTCTGGCGATGGTGTACTC
GGGAAACTCTTCGGGGTACTCTACCAAAATAAACGGTACATTCGGTAGAGGCGCGTGATA
GCGCACGCTGCTTGTTCGATCCTTCCGGTTGTTCGTCGTGAACCCCAGGACGGTCCCATT
CTCGTCGCAGTCGGTCGAGAAGAACACCCGATAGAAACGGTGGAGCGGAATGCGCTCCCG
GAGAATGAACTCGGCTCCCTTGTTGACAGCAGGCGGCTCTGCGGGTCGCAGATTCGGCAC
GCTTTCATCCATGAGAGACTCGTCGTCAAATGGGTAGTCGTAGTGGTTGGAGTCGCCCAG
AAAGTTGCTTACGGACGCATCTGACGCGGACAGGCACGTTTCAAAATCTTTACCAGAGGC
ACAGGTGGGTACCCGCTGTAGAAAGTCGACCGAGGGTGAAGTGGTCGTTTCATCGTCCTG
TGAGAGTTCGTGCGAGAGCGTTCCTGGCTCCGACAATTCCTTCGACTTTTGCGACGCGCT
TTCCTGCCCCGATGGTTCACTCGACGACTCCTCTGACTCACTCGCGGATTGATCAATCAA
GGCCTGTAGACTCTTCGCTGTAGCGTCAATCACCCGTTGCTGGCGCGCCTGCGTCGGGGG
GTCTCGGACCGGATACGTTTCATTATTCGGCCCGCCGTGCGGAGACTGCGGCGGGGACAC
CACATCGAAGAAACGAAAGTTGATGAGCTCCTCATAGTCGTTGTTCTTGATGAACTGACG
CTGCTTGTACATGTGGTTCTCCAAGGAGCCGTCGAAAGGATAGGCCGTGTACTGCCGGAC
GCACACCGTCGTTTGAAGGTGGAATATTTCAGTATACTTTTTCGAGGTGTGGTCTGTGGG
GTAGTCGCGCATATCCCTTAGTTTGTCAATCGGAACAAACGCGTGCACCGCGAAATCCTT
GGCCGCCAAACTCAACCTCTTGTTGGAATTTCCGTCATTGAGCGTGGACTCGGCCAGACT
TAGTCCTGAGGGGACGTCGACGGACAACCAGCCCTCATCCGCAATCTTGAGTCTCCCGCT
GATGGACACGACAGTGACAAAAGTAAAAAACAAACCATAGTCCTTCGACTCGTCATTGGC
CTTGTTGCAAGCGTCCATGGTTTTGGCAAACTCTGACGCGACATCGAATGACACCTCGTT
CGCAAACGAAGTGTACGCCTTCCCTTTCCCAGTGTCCTCGTCCGAGTCGGAGGAGGAAGA
CGATGCGAGGAAGAACACTTTCTTTTTCTTTTTCGGCTTAAGATTCTCCATATCGGCAAA
ATCCTTGGCGGACATTTCCGTGTGAAACTGGACGCTGGTGGATTGCTCCTCGCTCGAGAG
GGACAGCGGGCTAGACGACAGGACCGGTTTCTTTTTCGCCACGGGCACATTGGCGTGAGT
CGACCGTTTCAACGTCGTTTCCGCGGCGAGCTCCGCGACGGCCCTCGCCTTGTCCACCTG
CATGTTCATGTTCGCATCATCCAGTTTGAGGTGCCCAACAACCGCCTTGGCGACCTCCGC
AATCGTCAAAACATCCTCCAGCGAAAGGTTAAACGTTACACCACCGACTTTAATGTCCAT
GGAATCGTGAATTTTGGGCTTCAGCGGCATTCGCCCAAAGTGCTTAATGAGGCCGACAGA
GATGTCCCCGACACAGAGAAATCGGGGCGCCGTCCCACTTGGCTGTCGGGACGGGTCGAC
GCGCAGCGTGATGGGTGAGAGATTAACCGCGGTATTGGTCACCGCGAACTGCTTGGAGTA
AGTAAACGCCACCACACCAGCGCGGACGTTTAGTTTTGGGGACTTTCGGATCATGCTGGT
AGTCAGATTCGCCTCCGTGTTGATCAACTTGACGTTCACGCAAATTTCCAGGTCATTTCC
CTGCCGGCTGCGACGACTCCAAAAACTGCTTAAACTCCTTTCGCTTATTCTGCCCGGTGG
TCGCGTTCGACTGAAGTTTGGCCAACAGCCAGAAGAGCTCATCGGGGTGAATGGTCATCA
TGTGGTCAAGGAAAATGTTATGAAAGGTGTTGAGTAGACACAAAATGTGGGCGGCCATCA
AGGTACCCCTCGTGTTGTGAAACTCCAGCTCGAGGTTGAAGTAGTTGTGCAGGCGGGTTC
GGCCGGTGGAGGGGTTTAGGTTGTATCGATCCTGCGGGATGGCCTGATTGCCGACAATCA
GAGAAAATAAACCTTTCACGTCGCACTTGTCCGCGACCGCCCACGGCAGCTCCGCGCTGA
TATCGTTGTAAAGGGGGTGCCCCGGGGGGAGCGAAAGATACGCCTTAATGTCACGCGCCG
TCACCCGGATTGGGCGGACAATCTCATTTTCGTAGCTCAACTGGTATTGGTCGGCAGGGA
GGACCATGCTGAAGGTGGCCGTCCTGACCTTCAGTTTCGCAAAGGTGTTGTACTTTGGAT
CGTTGGGGTCCTCCGAAAACACAACATTGTCCTTGTTGACATTGACCAGCAGCGTCGCGT
TGCCTTCCACGAACACCTCAAAACGTTTCACGTTGGGAATGCAAAACTTTACCACTCTGT
CATACGTGTTAAACAGCTCCGTTGTCAGAGGGACGTTGTGGTACATTTGTGCCGTAAACT
GCCAGTCGTTCAACAGGTCTAGAAAAAAATCAACATAGCAAAAATAAAAGTGGACCATTG
CACCGGACAGCTTTGGAAGAATATTCCACAGCTTCCTGCCGTTCCACAAAATGTCGTCCT
GCCGGTCTAGGAAAAACTGCAGCGAATCCACCTCGGCGAAGAGCGAGTCCTTCCCGAGAA
CGCAGTTGGTGCGCACGCTGATGTTGTTGCTGATGAACAGCGACTGAAAGTTCTGTCGTG
TTTCGTTTGGAAGGAGGTAAAACCCGGGCTGAATGTACTGCGAACCTGCCCCGATTGTCG
CATTGAGATACCCTCTTTCGTGCGAGTCCTTGATACCAAAGGGAGGGGAGGGCACCACGC
TCCGCCGCTTGAAAGGAACGACAATTTTTGTTTCCCGAATGAACTCTACAAAAAACTCAA
AGCTGGCATTGGGCCGTGGTTGGCCAATTTCAAACTGTAGTCGCTCCAGCGGTCTATAGT
TGGGCGGGAGAAAAAACTGAAACAACTGAAAGCGGCAGTACTCCAGCCACGGTCCGTAGC
AAATCTCGGGGGAATCAATCAACAGCTCAAACCCCGTGGTGGGCAGTTTACCACGCACCA
CCTCTTCCCCACCGTAAATGTTCGGTGTATCCTTGTAAAACACAATGTGCGCCTTGCTCC
GATGCTTTCCATCCACCACAATACCAAAGTTTCGAATGAGATCTGAGGACTGGGTAGTGT
CGAAGTCGTGTCCGAGTGTGCTATCCCGACCCCGAAACAACAGCTGAGCCCGATCTCGCA
ACGATGTGTTACGCATAAACTGGGTTTCGGTGAGTTTACTGTCCATTTGGGCCATCCGGA
TATCGACGTTATCCAACGTCAGCTCCGTCACCGTGCGGTAGAGGTCTAGCGTCGGGCAGC
CGTCGCGGGTTAAGAAGACGCGTCCCTCCCCTCGCTGGAACGACGTATGCAGAAAGTATG
GGTGGCTCGCACCCGCACCACCAATATCGATAATGGACGTGAACAATTCAATTTCCACGG
AAGAAATAAAACTAAACAATTTCTGATGGAGGGTCTTATTCTTCAACTTATTTACCTGTA
TTTTTCGGGCCGCCACGACTTTGGGATCGATTTCCGCGGGGAGACCGTTTCCGTTTTCTC
CGTCAAGGTCCGTTTCCTTCTTGACCAGCTTTTTTTAAATGTCTTCACCAGTTTCTCTTT
CAGGGTCAACTTTTCGAACGTGTCGACCTCACTGGGTTTTTTCTTCTGCGCATTGTTGCC
GCCGGGGTTCACCAGGTCTCTATACTTCCCAGTGGCGTTAAACACCGAAAAGCGCATTCC
GTTTATATGGAGCTGAATCCTTCCCGGCTTACTGCGAATTTTCACGTCGCTGGCGTCAAA
CGTTCGTATCACCTCATCCCCTGGACGGCTCATCTGCGGTAGCGGGTCCGCCTTTGTGCT
ACTGCCGATTGGGACGCGGACGTCAGCCATTTTGTCCGTCTTTGTACCCGTGTAAAACGC
TTCCTTGAGCTCTTGCTGAATGTTTGTATCGAAGGGACGGTTGAGCTCATCCTCGGTGGT
GCCGTCCGACAGATTATCGTCCTCCTCCTCGTCCTCTTCGTCGCCGTCAAAATCCTCCTC
CTCCCGGGCCGTGCTGTTGTTCTCAATCTGCACGTGGATCTTTCGCTTCTGTTCGTCAAT
CCCGACAATCACGCCTTTCGTCGACTTCAAGTTGATATTAATTCTACACCGTGTACCAAT
TAAGCTTTCGCTGACCATATACTCGTGCACCCGAGTCCAGTTGGGGCTTTTAAACCAAAA
AGCCCAAAACGCAAACGTGACGTAGCCATCCACGATCCTAAGCGAAAAGTTCTCGTTTTG
GTAGAACACATTTTGAAAAAATATTCTCGCCTGTAGAGGGGCAATGTGAAACGATCTAAT
ATAAAACTTGGTGTTCTTTCCGAGCAGAAAGTACTTGCACACAACCGTTATCAAAAATCC
ACAAACGGTGCTCACGTAGTGCAATAATGTAAAACTAGCAACAAAAAAAAAGATAGACGT
AAACAGAAAAGACAAGAAGTCCGCCGTATTAAATTGCGCCTTTGTTTTAGCCATCTTCTT
TTTTCTTTTCCTTTTCTATAGTACCGTTATTATTAGTTTTCCTAAAAGTGTTTGTTTAAT
CTATTGTAAGAAGGAGAGGAAAAGTAGAATAGCAGACGAAAATGCTGGATAGATACGTGA
CCGTTGAAATGACGAATGTACCAGTAGTAATGCATTTTTTTTTTTTTTTCGAGAAAGAAC
TAGATACATGGCTTACAGGGGAACAGTATATACAATGGAAGTCCCTGTGCCGTCGTCAAG
GGCCAAGACAAAGAGGGAGGATTGATCATCACTCAGACAAACGCCTAGCAAGTTACACTG
AGGTAGAACCACTTCCCCTTTCAGCTCCCCAGCGGCACTAATCACCAAGACTTTCCCATC
GACGTGAATCTCGCCCCTATTTCGCTCCTGCAGGGAGACAAACTGTGTCCCGTCATCGCG
CACACAGACACCGGAGGGACCCATTGAACCATTGAAGCGGTAAAAGACAGACCCAACAAA
GTGATTTCCCTCCGGCACATAGCGCAGCAGCTGGTTCGCACCCTGTTCACACACATACAC
GTAGCCCCACTTGTCCACCGCCACCGCTACTGGGAGCACCAGCCCCTGACCACAGAGCGC
TACCACTTGCTTTCGGTCGCGAATAGTGCGATAGACAGCGCCACACGGATTATCAAACGA
GCTCGCACCAGCCACACCCGCGTCTGTGAAGAACACCTCATTGTCTTTGGGGGACACGGC
GACAGCAGACGGCGCAATGAACGGGCGCCCTTCCACTGAAGTAAAGAGAGGAACCGTGCC
AGTTTCACCATCCTGCACCTCTACAACTTCTGCATCAAAAGGGTTTGTCACAAAAAACGT
CTTTCCCTCTTCATCGGCCTGACACAACCCACGGGCCGTGATATCCGTCTCCAGTATCAC
TTCACTTGATTTTGACTCCACGTTGATGAGCACAATTTGTCCGTTTGCCGTGATGCCCAC
AATGTCATTGTTCGGCGTGCAGGTGATGCTCGTCAGGAAAAGGTCTGCAGACTCAAAAAC
GGTCTCCATGTGTTCGGTCGGCGATCTACTATTTTGCGATTCACGCTGTGTCAGAAAGAG
AGTATTCCAGAAAAAAAAAAAAAATGTGAAGTAAAGGACACAGACATACACATGCACACA
AGAAGAAGCAAGAACAAACGTAACGGCACATCGTCACAGAAATTCGCAATGAGAATGTAC
ACTAGAAAAAAAAGAGTTATTTAAGTGTCGCGGGGCCCATGTTTCCCCGTCGTTTTCCCT
CCCGCTGTCAAGAGGTCAATCCATTCAGGTACAAGGACACCTTGTCAAAGACAAGAAAGA
TGACAGCGTTGGATGGAAAGGAGCGCAACGCTGTCATGGTCCACCCACGGTACAGGCCCC
TCATTCCAGACTCCTTGTACTGCTCCATGAGGGCCTTTGTAATACCGTAATTGGAGTACA
CTGGGTCCACCTGTATTCTGGTTTTTATCACATCGGAAGGAAACATGACGGTCCAAAACG
CTATCCCAGCCAAACCACCAGCCCACATCCTTTTCCACACAGGGAGGTCACTGCTGCTTT
CGCCCCTTGGGGTCATGTACACCTTCAGCCGGTCGTACGTCCCGCACCACGCGATCGTGC
CGGGCACTTCGCGCAGCAGCGTGGCGGCACCACCCTTGTAGAGTCCCTTCACGCCGCCTT
CTGTGGAAAAAATCTGACGAGCACACTGAAACGAATTCGCATACTTTCGGTGCCCCTTCA
CGTCATCTGCCTGCATTCTGCATTTGACGAGCTCGAAGGGGAGTGAGACAAATGGTAGAC
GCCACGCCACTCCCTGTGCCGCCAATGACTACCTCCGTGAGGGTGGGATTATCGGTATTG
GCCTCGATGAGTCTTAGCGTGTATTTATAGAAAACGAACACACACGCGTGGTCGATGCCA
GATGCGAACAGACGAGCCCCTATCCCCCTGTAAAACCCTAAAAATCCGTCCTGTTTATAA
AGAGACGTCACACAGTTCACGTACCCGGAGTATTTTGAGTTTCCGTGCGCCTGCAGCAAG
ACTTTTACAGTGTCGAACGGGTACTCAATGAGCATCCCCGCCACTCCACTAGCAGTACCA
GCAATGAAGTCATTCACAAAACTCATAACGGCGTCTTGTACTGTCGTGCAGAATAGTCAA
TAGAGAGAGGGGGAGAGTATTCGTCCATATTCCTCACCTCAGTGAAGCGACAAAACACAG
ATTCACCATAATAACATGCATATTCAATATGTCTAGCGGCTGCTCTAAAGCGACCGTTAC
TGACCAGAAGCAACGCCCTTGTCAACAAGTCACTACAGTTTGCGACGCTTCTCTTGTGCA
GTGTCGTCTGCACCAGCTTCTAATTCGGTCCATCCGCCCGTGGAGCTTGCCCTGCTACCG
CCGCTGCTTTCCACGACGCCGGTATCCTTAGTACCCAGGTTCATGAACCCACCAAACCAA
TTATAACTATCTCGCTTCACGTCGTCTAGGTAATTCAGCAAGGCATTGTACTGCTCCACT
AGCGGTGAATCCAGGCAGGACTCCTCGTCCGCACTACGACTGGTATTTTTTACGTAACTG
GTGGAAAACAGCACGGTTTGATCATTTTTGACAAAAAAGGAGTTTTGCTCCATTCTATCG
GCCCATACACTTCATTGCGGTGGGGAAAAAAAAAAACAAGAGAGAGAGAATGAGGAGTGA
ACCAGCAACGCAAAGGCGTCATAATTCACTTGGAAACCACAATTCAGCCCACAGAGGTGT
ACAAAGAAGGTTACTTTGTGTTGTAAAATGCACACTGCACTGCCGCGCAATGTAAACTGT
GAAAGACCATTTTACACTAGGAAATGGTCCAACCCGTTTGTGCCGTCGTTGCCGGCTGCT
GTTCTTCGGCAACCGTGTCTTCCAACGTTTCCTGCGCCGCTTTCAGTAAACTCTGAATGT
CGTCAATGGAGTGGGTGGGCCCGCTGTCTTGTTTGACTTCCACCTCCTCTCTCTTGCGTT
TGACCACTTGGCGCTTTTTGAGCGCCATCAATTCTTTCCGCTGCAGCTGCCAATAATTCT
TGTAGAGAAACTGCAGGGTGAGGGCGGCCACCCAGCGCATTTCGGAAAGTGAAGGCAACG
CACCGTGCGCAACACGCTGACGGACTTCGACCGCCTCCTCGGGAAATCCAATCTTCTGCG
CCCGCTGCCGGTACGTCGTGGCAGATCCCATGCTGAAAGAACCAGTCATCACATGCACCA
CACGCGAGATGGCCGCCCCGTACAGTTGATGCACATCGCCGGAAGACACTTCGTCCTCCT
CATCCAACAGCATCGCACCGAACAATATTTCGGTCGACACAATATAATCGGGCAGGTGAC
AATCACTACGCTCGCGAAAAGTCCAGGAGTGTAGAATGGTTAGTGCGTTTCGCTTTGCCG
GTGGGCTCTCCTTGACACTAAAGAGAACTCTCATCACCTCTTCCCAGTCGTCGAGATCTG
GGCCGAACACTAGTCCTGCTAGCTGATAGTGCGGCTCGTCATCCTCGGAGGGAGGACGGG
GTGGCGGAAGACACTACTGGAGGTGGTTTGGTCTCGTAATCCAGATCCCCTAGCTCTCCT
AATCCATGCTTGATTCTGTATCCGCTAAGACGTTTTCTCTTGCGAACTTCACTCATATCA
GTAGAAAACACGTTCAATGTGGCGTAAACTCGCGGGGAGGGAAAAACAAAAAAAGGGAGT
GAAGCCACGTAGTGACGAGACGTCTTCTCCACATTCGGCTTTGAACAAAAGGGAGACATA
TCATTTTTTTTTTTTGTTTTGTTTTATTATATTATCAACAACAAAGAGCTGTTTTTTTTT
TTTTAATTTTATTCTACGTTCGTCTTGGAACAAACAAACCAAAAAACAATAATCGTTAAA
CCATCCAATTACATCACGGAGCAATCGCTACCCTGACCTCTTCTCTTATACTTTACTAAC
CAGTGCATTTGAATTTGATTGATCGCCCCTCTACGCCGCTCGCGAATAAGTGTAATAGCG
TCCAACGCAGGGACATGACCGTACTCCACTAGAGCCAGTGCCACCAGGATAGGTGCCCTC
CCCAGCCCAGCCACGCAGTGAACCGCCACCGTAGCGGGCTCGGTAATCGTACCCTTCTCC
AAATTCGACTTTTCCAAGTCCAGCAACGCAAACCAGTTTTCAATCACCGCCCTCGTCGGG
GGCGCGCCGTCGTCAAAGGGCCAGCTGTGCACGTTAATACCACTATTCTGAACTAGACCC
GCGTCGTAGGTCGGCCCGCAGACTCGTACAAGGTGCCGCACGTTACGCCGCTGTAGCTCT
TTGATATACGTGGGCAGATTACTGGGAGTGGGGGCATCCAAAATGAGAAAATTGAATAGC
GTTTTGGTCTTGTCCTTGTCTGAAAGACACTCAATCACGGTACAATTGATTTCCATTGCG
TATAATAGTAATACTGGTCAACCGTTCCGTAAGGGATCTAACCGTAAATATACGCTAACG
ATTGGGTGAACAATCGGTATTAGTACTCTTTTTTTTTTTTTTTTGGTTGTTCCTTAGAGT
AAAAAAAGGAGAAAAACACGATAGAATTTGCTCGCATTTTTTTTTTTTTTGTCTTGTGTT
TTATGCTCCCCCCTCGACCACAGAAATAATTACTTATCGTTTATCGGTTTTTAAATATAA
AATATGGTATACGTATACTTTACACGAGAGACACCTTATATATCTCCCTCCCCTTCTTCC
TCCCTGCCGCGCTTGCCTAGAAAGTTGGCAATTCGTTGAAAGATCCCGGTCGACATCCCA
CCAGATGATGTGGCGGAGGGTTCCCTGTAGAGAGGCGGAGGGGCCACTGACTCGGCCAAG
TGTTTGATCAGGTACGCTCCTCTGTGAGCGGCACGAAGGACGTAACCCTTTTTCCGGTAG
TACTCCCGCACACCAACCCCACTTATCACCGCAATATCCGTGTACCCATGCTGTTTGGCA
ATACTCTCCGCCCTAGCCAGCAGTTGTTTGCCGATTCCCGTGTGTTGCACTTTTTTTCGC
CGTCCCGTCTCGCTTGTCATAGGTGGGAATTAAGTTTCCATACACATGCAATTCGCGAAT
TAGTGCACACGTCCGCAGCTCTGCGAATGGCGTCTCCCAGTTGCGAATATTGAAGCGAAG
TCGGAGAAACCCAAAAACAATCTTTTCATCTTCCGTCTCGACCGAAATGAACAGTTCCGT
CCCCTCGCTGCCGTCGTACCGCCGCTCCTTCACCACCGCGCTTTGAAGGAGGGTGGCCGC
CTCTTTGGATCCTTTCACCTCCCGGCACCGGATGCACCGACAGCAGGAGCCCCTCTCTTT
CAGTTTTAGGGCTAACAGCTGTCTCAGGTTCGCCACGTCTACGCCGCCCAAAATGTAGTC
CGCCGGAATGTCGCGAATGACGCGGTTGAGCCGTATCCAAGGGTGGACCCTTTCCTTGGC
GTACAGGAGCACCTCAATCAGCTTCTCCACCCCGTACGGTTTGTAAGTTCCGTCCTTGTA
CCATTGCTCAATCACCGAAAACGGTGTGGTTTGACAAGGGTAGATTTTCCACTGGTCAGC
TTGCAGATAGGGCGAATTCAGCATGTCATCGAACATGAGTCGGTCCGCTTCGGGGGAGGA
GCCCGGAAGGTCCGGCATCAGGTGTACGTCCACCTTGAAGCCACTGTCTTTGAGCAGTTT
GATCGCCTGCACCGCGTCGTCCCGCGTACTTTGCCGATTTACATAGGACAGAATGGAGTT
GTCGGTGTGTTGTATACCCAACTGAACGCGTGTGCACCCATACCGTCGTAACTCCACTAG
CATATCCAAGTTCAACGTGTCGGGCCGCGTTTCCAGCGTCACCCCGATAATCTTGCACTT
TGCCGACTCGTTCAGCAGCTGCTCCTGCAAGAGGTCCAGTGGCGGCCTGCGCGGCAAGTC
CGGGGTGTCAAAGATGGTGTTTGCGGCATAAAACAAATCCCGGATGAACCTCTCCCTATA
GGAGGTGGGATAGCTTTCCCACGTCCCACCCAACACCAAAAGCTCCACCTTGTCCGCTGG
ATGACCAATGGCCACGAGGGACAAGACCCTATCCTCGAACTGACGGTAGGGGTCAAACTC
GAGACGGTTAGCGCGACGCACACCTGGTTCATTCAACAAGTAACTGCGGGGCTGTCCGGG
TTCGTTTGGACAGTAGTAGCAGTTCCACTGACAGCTAAACTTCTGCCCGTCCGGATAGGC
GGACGTGAATACGGTCACGACCAGTACACCGGATTGGCTCCTAGGGGCCTTTGAGACAAG
AAAGCTTTCTAGCACCGGGGAGTAGAGTGGCCCCGAATTTGGGGATGGGCCTCCTACGCA
GTCTTCGACATCGGGGAGGGTAGTACCGCCCACCGCACCCTGCACCGAGAGCATGTGCTT
GTAGCCAGCGAGCAGCAACGACTTTTTAAACACCTTCTTGTACTTTTTGTGCAATTGTCG
CTGTATTTTTGGAACCTCCTCCACTGACTTTGGATCTTTCAGCGCAATCTCTTTCACGAA
CTGCGCCGCCTCCGCAATTTGCTCATCTGAAAAGGCGTTTGGATCCTCCTCCTTCAGCAG
TCCCTCTAGCGTTGGCAAGTTTCTAATTTTTGTATTAATCCTTTCCATCTCTAGAGCGGA
CAAGGGTGTTGGCTCATCGTCCTCCGAAGACATTAAAAAAAAAAAGATAAGTAATTAATA
TTAGCAAAAATATTTTACAGTTTTATGCTTGGTGCAAAATAGAAGACGGGGAAGAGGAAC
AGTAACAGAAGACAGAGAGTAGAATAGACACACACCCACATCGAAAAAATTCAAGAGAGA
GAGAGAGTATACCATACCAATACTTACAAGGTAAGTGCAATCATTTAGCTACTTTCAGCA
CGCAACAGCCTTTTATGTTTATTATTTCGTTTGTTCCGTACCACGTCGTTATAAAATACA
ACCTCAATGAAAAAAAAAAAAAAAGTTCGATACCAGATACTGAAACAGATAAAAAATATC
AGCAACACTACATGACATTACAGTTGGTACACGCCAGTGATCGCTCCGTACCTTGGGCAT
GACGAGGTTTATAGCGCATCAGCCAATTCAGCTGCACTTGATTGATGGCTCCCTTGCGCC
GCTCCCTCACATATCCTACGGCGTCCAGTGGCGCCATTTGCCCATACTCTACTAACGCCA
GCGCCACGAGGATGGGTGCCCGACCAAGTCCAGCCACACAGTGTACCGCGATGGTGGAGG
GGGGAGTTTTGTTCGCCTCCGACTCCAGCAACTGCAACCAGTTGTCCAGCACCACCTGCG
TGGGGGGCGCACCGTCGTCAAAGGTCCACCCATACACCTTAATGCCGCTCTTCTCCACTA
CATCAGAGTTGTACGTGGGGCCACAGGCACGAACTAGGTTTTTCACCTTGTACTTTTGGA
GCAGCTTCACGTAGGTCGGTAAACTACTGGGACTGGGGGCGTCTAGGATCAGAAATCGGA
AAACCACATCCTCCGAGTCGGGCTTTTTGCACTCTACAAGCGTTCCATTGGCATCCATCG
TACTATCGCTGGCAGTCAATGTATATTTCTTTCAATCAGAAGGAGAATAAAAGGGAAGGA
GGGGACAGTAAGAGAGGGTACAACCCATCAACAACATTCGCGCTTCGCGGAAGCACAAAG
GAACGCGGGAGGGTCAGTTTCTCTTTCTTCGCTTTGCAACCATTTGGATAATATATAACA
TTCAGAAACAAACCGTTCCGGAAAAACAAAAAAAACACCCCAGCGAACCTGTTGAACCAC
AAAACACATGCGCAAGTGTATATGGGTAAAACAGGAGGTCAGTAGCTGTTGGTACCGTTA
AGGGTGTCCATGGCCTATGTTCGTTTACTTGTCCTTCTTGCTCTCCTCCTCCTGGAGAGG
ACTGTACTTGTCGAGAAAGGTCAACACCTTCTCCTCGTACTCTTCAGGGCTGGTATTGTA
CAGACCGCAGTGAAAGGCATTTTCACAGAGGTACAACTCCTTCGGCTCTTGCGCGGCCTC
GAAGAGTAGTTGGGAGTGCTTCACGGGGACAATAGTGTCTGCCGTGCCGTGCATGATGAG
AATCGGCCGTGGGGCCACGTTTTGAATACAGTGCAGTGCTTGACAGTGCTTCGAGGGTTT
GTTGCCAATACGAACATTGAGCCAAAACGTGGCACACTTCCGGAATAACTTGAACAGGAA
GAGACTGTACGGCTTTTGCGAGAAATAACCACCAAGGAACATCACAATTTGCTGATCCAG
CAGGGTGGCGGAGGTTGTGATGGCGTTTTCTGCAATCACAATATCAATCGACTTGTCGAT
CGCGGCTGCCATAATGACCGATGCCCCACCGACACTCGTTCCCATCGCGCAGATTTTACT
GTAACCGAAGCGCGTCTCCATCACCTGGACAGCGGAGATGACATCAAAGCGCTCCTTAAT
ACCAAAGGTAAACCCACGCATATTGCCATCACTGAGACCGTGCTCGCGGAAGTCAAACAA
AAGACAACCGTAGCCAGCCTTGTGTAGAAAGGGAATGTGTCGTTCCCACGTTCGCCTGTC
CCGCCCGCCGCCGTGCACCAAGACGATGCCCACTTCGCGCTTGTTGGTCTCCTTCGCGGG
AACGTACCAGCCCCGGAGCGTGTAGTTGTCTGTGGACTCAAACGAAACCTCCTCGTAGTC
AATGTTGAAGTCCGTCTTTGGGTCGTTTACCCACCCCTGCCAGTAATCGGGGTTACCTTT
CATGACCAGCTGCTTGGCGCCTGGCTGGTGGTGGTACCAAGGAGGACGAATGGCAATCTC
GGACACAAAGTACGCCAGGGAGACGTAATAAAAAGACATTGAAATCACGATAAATTTTGC
CGCAAAAAAGAACCCATTGCAAAAGATGAGAAACAGAAACGGAAGAACGAGGCACAGAAC
GGTTTTCCGCATTGTGTCAGGACTCACAACGTCGGAGGCGGTTTCCTCTATCATTTCTTC
GTTTTCCTTCTCCGCGTTCTTGTTGGACGGCCGCTGCTTCTTCTCTTCCTCTTTGGAAAA
CAGAATGGCCAGTTTTTGCCGCTCTGCTTGCGGGGCGCATTGGAGGGCAGTTTTCCCATC
CTTGTCGCGAATGGAAGAGTCGATTGAGGTGAGCTTTAGTAGATACTGCACCAACGACGT
TGAGTTGTTTTCGCAGGCGTAATGCAACGCCGTTCTGCCTTTACTGTCTACTTCGTTTAC
ATTTACTCCACCCTTCATGAAGGCCTTGACCACGCCGGGACCGTCCGCGTGTTTTACGGC
TTCAATAAAATCCGCCATCCGGATAGTGTGGCAAAAAAAAAAAAAAGGCGGTAGATAATA
CGATAGAACACAAATAGATGCTATTTGAGTTTCTTTTCAGAAGGGAAACAGCCGGAGAAA
GAGAGATGAGATGAATTAAAGGAGCGAACAGGGTATCGACGGATCTTCGTTCTTTTTTTG
AAACCAAATGCTATCCGAAGCCAACTGTGATGTCGCCAGACTGGAAGGCGAAAAAAAAAA
AAAAATCATACTGTAAAGTCAATGTGATTAAATAAACGCGGCTGAAAAGTACTCGGGGCC
AACTCCTGCCCTCGTGCACGACTCTCCCATCGCCATGGCGATGCCCTCCTCGAGTGCGGT
GCCTCCAGTAAGGGAGGTGGAAGTGAGTCTTCCAAACAACTTAGCGGCGACCACCTCCTT
CTCTTTCACGTGGCTCGCCGGAATGTACAACCGCTTCCGAGTGCCCTTCTTCAGACCAGA
GACGACCTGGTCAAGGCAACTAAACTCAAGGACGTCGTACACCAGTAGGATGGGCTCATG
GAGGTGCTCCATACCGGTGAGGGACAGGAGCACGAGGGCAGTGTCAAATACTCCGGTGAG
CGATCGTTTCACTTCAGCGGAGGGCTCACTCGTACTCACGTGTGCGTGGAGGGCGGCAAG
GGCGCCTTCGTTATCTTCCTGGAGCAGTTTTGAGAGTACCGACGCGGACACTAGGAGGTT
TATCGAGTCCGCGGAACGTCTTTTGGAGTTTTGGGCGTCTTTTAGAAACTGGTCCAGTTC
ACTGTAATTATGGACGTCCAAATAGCCTACCACCGTCACCGCAACTGCCAAAGCAAATGA
CGTGCCCTGGTGACAATGCAAAAATCCCCCCCAAAAGGTGCGCAGCAGTGAATAGTCGTT
TGAACTGGTACACATGTAAATAGCGTAAAGAAAAGTCAACGGGTCCATTTCAGGAAAGTT
CTTTGATTGAAGAAGAGTGTCCAGCACTTTTCGTTTGACCTCGACCCCCGCGGTAGACGT
CGCGATGGCCTGAACAATTTTGTTCACCTTGCTCGTTCTTCCCAGTTTGGGCATCGCCAG
CTGCAAGGACTTTTCCCAACCGATCCGACGGTGGTACTGTAGCAAACGCCCCACTGAATT
TTCGTCGGGGTCGACCCGGTAGACCTTTTTAAAAACGCTCAAGCAGCGCAACGCGACCTC
CCACGTTTCCACCGCCGGTATACTCTGCATACCGCTAAGCAGGCAACGAAAGTGCAGGGG
CGTCACCCTAACCGCTTTGCTCGCCTCCGCTTCGTGGATAAGCACGAGAGCGGCTTTCCA
CCTGTCAGTAGGGCGAGAATTGACAAACCCCAACAGCGTATCGTCGTTTCCCTCGACCGG
TGCGGTAGACGACTGACCCATGCACAGAAACAAGCACGCCACCAAAGCGTTGGGAAGGTG
GATGGAGGCTCTTCGAAGGCAGCAGGCGAGCTTTGCAAAAACAGACAGCCCAATATGTCT
CACCGTCGCCTCGTTGTGGAGAAGAGACGAGCAAATAGATTCCGTTGAGTTCCTCAGGGC
GGCTTTCATCTTGTCCGTTTGCTGTTGGGATTGTGTAGAGTGCTCCAGTGCCGTCATAAA
CAGGTCCAGCAGGCGCTGGCGGCTCTGCACCTTCTCACTTTGTAAGTGTGTTCGTATCAG
CCGCAGCAGCGGGGAGACTGCCCGCCAGTACACTTCAATGTCGGATGTTTTTTCACCCTT
CCGATTCGGTGTCTCCGCTGGGCAAAAGGTTACTTCTTCAAGAAAACGCTTCACCACGGC
GAGCACGGCGGCATGATTGGTTAAACGACTCACTACCTTTTCATCCCGCACGCAGCGCGC
CAGCAGCAGTGGGGAGGATTCCAAGACATCCATATACAAGTTTGGGGTGGATTGCGAGAG
AAAAAGGGCCCCTCTCACATACGTGATTCCGTCGAAGAGCCACGCTTCGCTTTCCTCTAG
TTTCTCTCCACGGAGGGCTTCCTTGCTGGGATGCTCAAAAAGAAGTCCTCTGTTGAGCCA
ATTGGTCGCGCAGGAGGCCGCTGAGGCCGCGTCCCCTCTCGCGAACAGTTCGCTCAGAAT
ACCCTCTTGCTGCGCCGACAGTGCTGTAAATGTGCTTCTTGGAGAGCCCACGGGAGGGCG
CTTTAGACGAAAGGCCAGTGCAACAATGTCTGGACTAGAAAGTCCCAAGAGATTCGCCCC
TTGGTCGGCGTCTCCTTTCCCTCTCTGGCCCATGACCAACTGGTTTTACTATATCCCACG
CCGTGTCGGGCACCCCTTTCCACCTTTTCAACAACACTTGCTCCTGAACTTCTTTTGGGA
GACCCACGAACACGGCGATAGACCTCTGCCAGTCCCCACTGTTCGCCATCAAGTTTCCAA
CCTGCGCGAACTGCTGCGTGCTATTGCTGGTGCTGAGCGGGGAGGAGGTGCAACTCTGTC
GAACTTCCTTCTCAATCCGCTGAAGAGGAAACCCGGATAACTTGTTAAACAACGCAACCA
CGTCGTGGACTCCCTTGCTCTTCATGTTTCGTCTTCCCTTTTATGGTTATTCTAGGAAAA
TTAATGGGGAGCTGCAGACGAGAATAAAACGAAAAGGCAACAGCATTGACCAACAGCATC
ACGATAAAAATATATTCAACAAGAAGACACAAACAAACGTTATTTCCAATAAACTTCTTC
TGTTGTGAATAGAGTAAGTGGTAAATGCTATCATAGCGCCTCAAACGAGCACCCTAAAAG
GCCATTTCCTTCCCACTGTCTTGGGACAAGAAAGAAATCCGCCACAGCCCCGTTGGAGGG
TTCTCGCCCAAACGGTCACTGGCGCGTTTTCCGCCGTAACCGACTGCAACGCAGATCGCC
AGTTCTCCGCGGCACTTTCGGAGTCAATATCGCCATATTGTACCACTTCAAAGCCATCTC
GGAGTCCACCGTCCCACGCAGGGCTATTCATCTTCACGTCAACGATGCGTAAAAACGGTC
GCTTCGATAACATTGCCTCACGTTCTGCATTGACCGGCCGTGAATCATCCCTCGTCGCGA
TAGACGGTTTCGCCGGCGCGGCTGTCATCTGTTGCGCCGCCACATCTCTCGTCAAATCCT
GGAGACGCATCATTTCGGTATACATGGTTTCTTCAATATCTTTCAGGTCATTCGACCGAC
AGTTGTGCTTGTTTCTAGCAGAACGAACCGCGTACAAGTCGCAATCTGCCCTTGGAAATC
CCTCTTCGTCGATTAGTCTGCCCCGAAGTCCTACAGGAGTACCCGCCAGATATTCCTCCG
CTTCTCGGATGTCTTTTAAGCAGCTTTCCCGCTCCGCCTGCAGTTCGAAAAGCTTCTTTT
TCAGACGTTCGACCTCCTCGTCCATAACAATTCGTAGGTTGGCAAACACTGAACACGAAA
AGAAGAAGAGAGGAGAAACGAAATACATAAAAAGTAGTACGATGTGAAACCCAAGTTCAT
ATTATGGTTCCACACCACCCCTCCTCGGCTCGATACAAACGCGTCAAATTATGTGAGCGG
TTCAACTACAACAACAACAACAACAACCAAAAAAGGGAGAACATCTCATATCTTGTAAAT
CTGTCTCAGAAAAATCCCATACTTTTGTCTGGATCGCACCGTCTCTTGTCCTTCCTTCGA
GGTGAGGCCCATTTCTATCGGGCGAACCCGGTTGAATGCGTAAACATTTTGTAGTGTTTC
CGTGGTTTTGAGCGTGGCGGCCGGTTCCTGACTGCATACTCCCTCGTGCGCCGGGCCGTA
GAGCATTGCCACGACCTCTCCCGCGCTCATTTTGCCGCGTTCCTCTCCGGCGACTAGTTC
GTCGAAGGACAGGTCGGAGCACGTCAGCAGTGGCAGTTGGGGGACCGTACCGTCACTGAA
GAAGCCGGGTTCCATTTCCTGATGCGTCTCGGCCGTAAAGGGGGAAGCGTTACTGTTGCT
CGACGACAAGTTCTTCCCACCCGCCGTTCCTCGTTCCACAAACGTGGCGGTGGTGGCGTC
GGAGGAATACTCGCCTCGCCGCACCCTGGCCGAACTCATATTCTCCCTCACCTCCAACAC
CTCCTCTACGACGGACTGTAGCTCTTCTCTGGTACCAACACCATCCGTCGCCACAAACGG
GTCGTCTAGCATTTCCGTGGCGGACGGCCGCGCGTTTTTTTCTTTTGTCAAAAGACGTTT
GATAAAAAGACTCATTTGCGGGGACCACTGCTCCTTGTGTTGGAGTGTGGGTGGGTCTGA
CTTGGGGATCAAGGTGAGGAGACGCGGTATGGTGGCGTTAGGGTAGGGCGGCCCGTTTTC
TGCCATTTCAATCACCGTAATCCCTAAACTCCAAATGTCCGCCTTGTAACTGTACTCGTC
CTCGACGATTGCCTCCGGCGCCATCCACAGCACCGTTCCGATAAAGGTGTTACGTCTGGA
CCAAGTATTCTCCAGCTGCGTGCTGACACCAAAGTCGGCCAGCTTTACCTGACCGTCCCT
GGTCAACAGCACGTTGCTACCCTTGATGTCACGGTGTATGAGCCGATGCTTGTGGAGGTA
CTGCAGCCCAAGGAGGACTTCTCTACACACGTAAGCGATCAGCTTTTCTGGAAGTGGCTT
CTTTAGAAACTTGTGTACCAAGTCTACCGAACCCCCTTCACAGTACTCCATGACCAACCA
CAGTTTTCCCAGCGACCGGTATGTACCGTAGTACTTGACAATGTTGGGGTGGTCACACTT
TTCCAGAATCACCACCTCTTTTTCTATTGTGGACAGCTCCTCCTTTGCGGTGAGCAATAT
TTGTTTAATCGCGACAATATCCCCCGTGCGTTTGTCGCGCGCCTTGATCACCACACCATA
ATTGCCCGTCCCGGCACTTTCTATACCCTCAAAGACGTCCTCCGGGTTTTCGGGGTGTAT
TTTAATCTTGAGAAAATCTTCGCTGGCCATAGCGATGGCTGTCCTATTCCTGGAGCTGGG
TTGTTAGAGGAAAATGAAATAGAGAATTTGTGTGTGAAATCAGATACTCCTAGGGAGCAG
CAGGGGGAACAAAACAAAAGACCTACCCATACACAAAACAGTTAGATCACAATGGGAAAG
TAAGTATAGATAACAATGCGTACGTTCTGCATTTTATTTGATCGCTATTATGCCATAAAC
GTTTTTTTTTTTTTTCCTCCACTCGTCAAGGAAAGAATTAATCTATAGGTTGCTCGCTAA
ATCCTTTTTTGAACCGATAAGGGCTGTTCCTGCTGCTGTTGCAGTCGCAGTTGGGCGCGA
AGGGTCTTGTTCAAGTCGTTCATATGGCCACGGAGACTGTCCACCGCCTCCTTGTTGTCG
TCCAGCTGTTTTTTCAATGGCTCAAAATTGCGTCGGATGAGGGCATCCACAATTTCAGAG
GTGGACGCATTTCGTTCCGCCTCCTTTCGAATCTCCTCCTGCTTCTTTTCTTCTTGCACT
TTCTTTGCCGCCTTCTCCGCCGCCTTCATGCTACTGAAGGAAGCCGAGGACAGCACGATA
GACTGCCCGATGGGGAAAAAGGTGACGTCACGTGAGTTTATCATCCGCATCACGTAGTGC
TCCTGACCGGTTAGTTTGCTCTTTTTTCGGTTGAATAAATAGTGAATAAAGTAGACATAC
TGCCACATGTTATGCTCTTCCCCGATATGAATGTCGTAGGTACCCGGTTTGACGAGGTCG
AACACGTTCCGCTCGACGCCACAAATGAAGCACTTCTTTTCCTGGTCCACCAGGATGTAC
TCTCGTATCGATCGCGATGTGGACAAACTGTCAACAATGATACCAAAGAACAAGTTGGAC
ACGACTAGCATAACAATAACATAGTAGGCGAGACGGAAGAAGGAAAACCAATAGCCATAC
CCGTCCTTTGAGTAGTAGGTGGGCCAATCCGCCGTGTCGCCAATACCACCCGTGTTACGC
AGCGTGTCCAGGTGCACCAGTAAGCACTGGGACAAGGAGTAACAGTTAAAACCGTTCCCG
CGAGACCCCAGGGGGTCGTACAAGTCGGTAAACTTGTAAAAAGATATGGTGGTGAAGATA
AAAATCACAAATATCATCAGCAAGAAGGTCAGAATGAGGGGCACAACGTTTGCCGTCAGC
GCACGGAACAATGTGCTTAGTACAGGACTACTGATCGACACTTGCAGAAGCAGAATGGTA
TACCAAATGCGGTGGTGCACGTATCCCATAATGGAGACAAACAAGAAGAAGGCGTACCGA
ACCACTTTTCCATTCGTGCACAGGTAGTAGGCGGAGCGGAAGATTTTCTTGTAGAGTGGC
ACTTTCTTGAGTTGCGGGTCACTCATCAGCATTTCTTCTCGGCTCGCTGCAATGTTCTTT
CGAGCCTTTTTGCTGATCTCTTCCTCCCTCGAGATCCTCCAGTCGGACCAGGAAATGCCC
ACGTCCACCACACCAGGCCCGAGAACAGCCTGCAGCAGTAGCATTCCATGAAAGCAAATC
ACAATAATACCCAGAATGTTAATCCCCAGCTCAATTTCGTCGCTCGTTCCATCACGATAA
GGGGACGTGGAGTGGCGCAGTCCGATCAGCATGAGCAGATTGATCACGAGCATAATAATC
ACCGCAATATAGAGGATTTCATTCGCGCAGTAGTTGAGTAGGTACGGAATAATGTACTTT
CGCATGGATGAGAAGGTGTTGATTTCAATGATGAGACCGAAAATGCGACTGAAGAAGTAC
TGCACCCGCTCGTTGTCGCTGGTTCGCACCGCGTTATTGATAATCTTGTCCTTTGTCTCG
CGTGTGAGGTCCTTCGCGACTGCTGCTCAGGAGACGGAAGTAGACACGCTCCAGGAAGCC
GTTACGGACAATCTCCACTTTGCCAATTTTGGTTTCCAACTCTGTGTAGTACGGTGACTT
GCGGAGGACTCCCTTAATTGTCTTTCCCCGCCTATCCACAAACTCTTCCTGCTCCTTCGT
CCCGTTGCTCTCGGCATTCCTGCTCGCCGCGAGGAGTTCCATGTCGTGACACATGCGGAA
AAACGTATACAGGTCGACCGCCAGCGACAGCTCATCCTCCAGTTCCTCTGACCCTGTAGG
GAGGTCTCTCTTGAAAAAATCGCGAAAGTACTGCGCTACCGTTCGGAATGGCCCCACAAA
GTCCCCGCTCGACAACCCCTTGGAGGTTGGACGAACAATCCGCCCGTGACGGTGAACGTA
GATTCGAGAGCTCCTGTCCATGGTGTGCACCAGTACACTCAAGTCCGTCGTCGACACGAC
CTGGGCCACGTAGGACGGTTCCTGACGCCCTTCCAACAGAGCCAAGAGGGTGGAAACGGC
GCCTTCCTTCATCATATCCTGACACTCCTGCTTCGACGGCTGAGCGGAGTCCGTTTTTGG
TTTCCGTTTAGGTGGTATCGTCTCTTCCACACTGAAATACACAGCCCTGGGGTTAGGGAC
GTCACCGTCGGCCAAAATTTGAGACAGGTAATCCGCCACGTTGTACGCCACAAACGTGTC
CTGATTGATTTGACACGGTCCTTGAAGGGTCTCTTTTATGGTCGAAAAGAGCTGAATAAA
AAAAGGAGTGGTCTTTTCACTGGCCGCTTTGGTAGCAAAAGAGACCAGTTCCACCATGGA
CTCCACGAGGTTGACAGATATGTTGTTGTCGGGCTGCGCGACCAGATAGGTTTGTACCGG
CGTAAACTGTCCATAACACAGGAGCTGAAGAAACCGCAACTCTTGGGTGATTTCTTCCAT
GTCACTGAACATATACGACACATCGGCCGCACCTCTTCCTGTGTGGGAACCCTTCCCTAT
CTGCTTCAAATCGTCTTGGAACGCAATCATGTGGTTACGGAGGTTGTAGAAAATTTGCTC
ATTCGCACAGGCGCGGCAGTAGTTCATAAAGCTTTCCTGCATCCCTCGATGTCCATTCAT
GGCTAACGTAATAGCCGCGGAGAGCGCGGCCATTCGGACTGCCTTGAATTCGGACCCTAA
CAGTTCTCCCACGAGGGCGATGAGTGGTATGGGAATGTCCAGTCGCGCGTCGCCTTTCCA
CCTGGAAAGGACCGTCTGACGGACGGAGTCGGGTGTGTCTGCCGTCAGAAAGACATGCTC
GCTCGCTTTGCAAGTGATGGGTGTGTCCTCGGAGTAGTCGTGCGGGCTGTTGGGCGGAAG
AAGAACGAGCTGCCGCACCAAGTGGAGCGTCTTGGTCGTGAATTCAACGTTCATGACCGG
TAGAGCACACAAGAGGGTTTGTACAAAGTAGTACCCATTGTCCGCGTTACGAAAAAGGAG
ACCCACCGCAGAGGAAAACAAATGTTCGTCCATATTGGCTGGGGCTTCGCCGAGGTTAGT
TTTGATGAAGCGCTCCCACTCGCTTGAGGCACTCGCGTCGGTTAGAATGACCTTTTCATC
GTCCGTGTATTCCCGAACTTCCGACGCTACTTCGCCTAGTGCCTCCTTCTGTGGATAACC
AGTTTTGCTGTTTTGCTGCGCAGACCGTCTCTCTTCCACATTCAAGACTGACTCTCGGAG
GGCACCCGTGGCCCGGTCGTTGCTCCAACGGCCCAGCCCCAGAAAGCGGGTGTCGATACA
CAGCTGCACATACTGTTGTACCACCTGAATGTCGCTTCGTTCCCAATGGTCTGCTCTGCA
CGATCCACTGCCGTCCGCCGTAAAGTAGAACGAGACGAGGTCAAACGACACGTCCACGAA
TTCATTCAGCGCCACTTGGTCTAGGCTGTAGACGCGCTTGTTAATTTGAGAAGAAATGAG
CTTGAAGTTTTTAAGAATGCACCCCACCGACGCCAAACAGTACATTGCCATGGTGGTGTG
CGCCTTCAACCCGAACCGTTCGGCATCCATCTTTTTCTCCGCCTCCGTCGACGGCGGACA
CGAGTAGACAAACTCCTCTCGCCTTCCCAACTCCTCCTCGAGCGACGCACTGTACAGCTG
CCCACCATCCAGTTGAATCAACCGCGCCACATCTAGGGTGCACATCCTCACGAAGCTCGT
GAAGTAGCGGTGACTGCACACGGACGGTAAGACGGTGACATCCTGCGCAAAGAGGGTCGT
TAGCAAGGATACGTACGGACTACGGAAAAAGACGGGGAGTACCGCCTCGGAGCAGATCTG
CAGAATGGCGTCGACAGGGCTCACCCCAAACACTTCTCGGCGAATTTCCTCCGGCTTCAA
CAGCTGGCAGTCGTTCGAAATCAAGTGCAGTAACCGCATCAGCTGGAGGTGAAGGTCTAG
GGCGCCATTTGCCTTGTAGCATTCCGGACCGGATAACACAAGTTCCCGTAGCGTGGACCC
ATTTTCCCCACACCACGTCAGTCGAAACTGAATGAGACGCGCGGAGGAAAGGTTAGACAC
CAACGCGCGCCACACCGCCTGCTGTCGTACCCCAATCGTACCCACGCTCGAGTCCGGCTT
GGTGAGTAAGTCGAATAAAAAGGCGAACGTATTCTCTCGTCTACTCTCGAGCAGCAAGCA
CTTGACCAGTTCACTGTAAATAACAGTTGGTATTGTCGCCGTTCCCTCCGAGAGGGTGGG
CTCTAGATAGACTGTACGGAGAATGTCAAGCACCTCGGGGTGAACAGAAATCAGTGGTGA
GAAGGTGACACTTTTTTCCCTAAAGATTTGGAGTGTGTCTGCGTCTTTGCACAGCAGTGT
GATCAATTGCAAGCAAGCACCTACCAATTCCGAAGAAGCTGGTTTGAGCGGGACATAGAT
CTTGGACAAGACTGCCACCAGCGAGTTTGGTATACCAGCACGGCGCACCACCTCTAGCAT
CTCCTCTGGCGACTCGCCGCCATCTCGTTTGATATACTCGTGAAGTTTTTTCACCGTGCT
GTTCACCAGCGATATCGTGTTTCCCCGCTTAAACGATCGGGACAACAAACCCGTTAGTGT
CGTGGCAAAGTGATTTATTTCTTTAAAGTAGGACAGACTCCGGGCCGAAGACAGCACCTG
CACATTTTGCGAAAGGGCAATCACTTCTTTTACAAAGTCCGTTAGCCTAAAAAAGAGAAA
AATGCTGGCGTTGCGCACGGTCGAGCTTTGCGTCCTAGACGATACCTTGATCAGCACCTC
GAGGAGCTGACAAGTTAAGCCGTAGACACCCGTGGGCGAGTTGGAGGTTCCCGCGGCCTG
ACGCACCTCCGCGGTACCTTTTCGACAGCACGGGATACACGAACAACACCGACGCTTTTT
TCTCTCCTCTCCTTCTCCGACAGACGTGCCTTCCTCCGGGTCGCACAAGGACATGAGCTG
TGCGATGTGACGAACCCCCTGTTCGGACCGAAAACAAGAAACAAGTTGCATCACGAATTG
CGCCAGGTTCACGTCCACCACAAAGTTGACCAAAATCATGATGCGAAGAATAGAGTTGTA
CACCGAGCGACTCTCCACCACGTCTGTGGGAGTATTCTCCGCACAACGGTTCAGTGGCGT
GATCAACGCATTTAGGAGGACCACGGAGTCGGACGCGTTGAACACGCCCGCATTCAATAA
CTCCATGATCAGGTGCAACACCGCCATGTTGCGGTGGATGCACTCCTCTGAAACCGACAG
ACTGGTCGCCGCAAAGTATTCAACACAAAAGCTTTTGGCGCTTTGGAGCGTGACTGGGAC
GTTTTCTGGCGAAAAGGTCACCGAACGGTGCGAATCGGAGGGAACAAAGTACAGTGTTCG
GATGTCTTCGCTCAACCGAAGGCTACCCGGAAAGGCGACGCACGTGTAGGCGAGAAGGTC
AATGAGGGCGCCGTGAAGCTGGGGTGGTAGTCGATCAGAAGACAACAACAGCTGGAGCGC
TCCGCTGGACACAAAGGACCCGACAACCCTTTCCATCGCCTGCGTGTTGCGGTTGGAGCA
CAGGGCGCTAAAGAGTCGAATCTGCTCGGTTAAATATGGAATGAGATAGTCACGAATTTC
TAGAAAATCATCGGACAGGGTTTGGAGACTTTCGATGGGGATGTTGGTGGTCTTTTTGGC
TGCGCTGGTGTTCAGTGCGCTCATCATCAGCTGGTGAAGCAGATTGTCGTGCCGTACGTA
CTGCGCCGAGACAACAGAGCCGACATCCGAACTGGGTGTAAATATGTCGTTCCGCACGGC
CACCATCATAAGAGGCTCATTCTTTTGAAACTTCTCCTCCCAGTATAGCGTGTCCTCGTC
TTTCGCTGCGTTTGTACTGGCATCGCCGTATGGAGAAAACTCACTGCGCTCGAGGAACAG
GTCGGGCTTTGTCAGCAGAATGGGAAGGAAAATCTCTTTGGTAAACCGCATATCTTGGGC
GAAAAAGTCCAAGAGCTGCCGCTGGCCTTCGACAAGGGTTTCATCACCGCACCGGGCGAA
CAAACGTAGGATGCCGAGAATGGGGGGACTGCACTTGCCGTTCTGGATGAGCTTAAGGAA
GAACGTCAGACGGTGTTGGGCACTGGGGAGCTCCACAAAGCTGGGATTATTATTAAAAAA
GACGTACAAACAACTAAACGCGCTCGAGACGTAGGCGGAGCACTCCATGATAAAATCAAC
GTGCTCGCTGAAGCTCTGTACGTAAAAGGGACGGTTCTCCAGCAGCTCGCACAAGAATTC
AAAGCAAAAGTCCACCAGCTCGCCCAGCTCCACATGACGCAGCTGTGCTTTCTTGACGGC
CGTCGTGGGGGTGGTGGGACTCTTAGGAGAGGCCTCTGTCGCACCTACCAAATCAACCGT
GAACAGACGGTCCTGTTTGACTTGCGGGCATTTCATCACGGACTTGATGACTCGGAACAC
GGCGGCTGGGACGCCCTGGTTAAACAACTTGCGCTGCCACAACGGATCGACCATTGCCGC
GGATGCGGTGTGAAAGGCGCGACGGCCAGTCTGCTCATCGGGTGTCTCCACTCGAAGCAA
ACTTCGAAGGTGCAGCAGACTTTCATTGACCTCTCTCAGATTAAATGAGTCAAACACACC
GCTGGACGCGTTGGTCGTGAATCGCTCTAAAGGGGGCAAAAAACTACGAACTCTGCTCAC
CTCCTCCAAAGCCTTCGAGTTCAATCGTCTGACCTCTATCGCGTCTCGGAGCGATTTCGT
GACGCTTCCCAGCAGGGACGTGGTACCGCGAGTGCGCTTCCCGTTTACTAAAGATCCGAC
GGTGTTCAAACTGTCCGCGCCGCCGTCCACCGGTTTACCACCCACAATCCAGAGTCGTCC
GCAGTCGCTGAGGGGGCACTCGAGGAAGATGTGGTGGCCACTGCACAGACTCTCTGAGCC
TACAGAGGTGGAGGCGGTGACAAACCGGAACAGCGTCCCATTGTTGTACCTATCGTCTGT
CAATGCTACCGTGTAGGAGATGACCGCGTGCTCATTCTGTGTGGCACCACTCTGAGGCGT
GTTCCCCGACAGTATACTATTCACGACCGCAGCGTTGTCCATTTCAGTATCGGGCTTCTC
TCCCTCATCGACTGCAGGCGCTCCAGCACTCTTTTTATTGGCCACCTTCTCCGATCCGGT
AACGAGGTAGAGACCGGAGGAGAATGATTTCAGCCGGTAAAGGTCCCGTGGGTTACGGGA
GATGGCACCACCCCGACGGGCATCCGCCGCTTCGACGATAAACAGGGACAAGTGGGTCAC
CTCATTGTTGGGGCACAGCCGCCGTGACAAGTCCCGATCCGTTTCACCCTCCGTGACGTT
TAGGACGTCCGCGTCGGCACTGGAGTTGCCAATTTCAGCCGAGGCGTCCTTCAGCACACA
GGCGCCAGACGCGGGGTCTAACTGCAAAAACTTCAACTCCTCCGTGTGGTACAAAGTAAT
GCAGTCGCCACACCGAAGGGTGGACGGCTTGTACAGTGGGCCGACGTCCCCGTCATAAAG
GGACAGTTGAAACCCTTGGAGCTGCGTGCCACAACTAACCTCATACGTCATCTGCTCACT
CCCACCGGCCTCCTCGTCGTAGTGCTCCGCCACATTTAGAAAGTGTTCCCCGTCGATCGA
TTGAAGCAGGACGGCGTCACCGTCTACCACAGGCTCACCTTCTACTCGAAGTTTGTATCG
GGGCATAATGCGCCACCGATCCGTCAGTTTCGTGTTCCCTCCTGCCGCGTCCAGTTGCAC
CTTCAAGTTTCCCTTCAACACAACGGCGTGGTTTTCTTGGTGGCACGACAAGGGTAGTTG
ATGAATTTGATGCTGCAGCGTGACGACTTGTCCGTATTTGACCAGCATGCCCTCCTCCGA
GTTGGTAGAGACCTCCACGGCATCCGCTGGGCGAAGGACGAACACACAGTACTCGAACGG
GACGGAGGGATGCAGAGGGTCGTACGTTTGCAATCCGACCGGGGACTCGGCAGAGGAAGT
GGAGATCACATAGCCGTTCGTCGACTGACGGAATAGAATAATACGGCTCCCATAGTGCAA
ATTAGACGCACTGGACATTTTCCTTTTTTTTTTTTTCTTCTTTAGCTTTTGTTTCCTACT
ATAAACAAGCGAGAAAGACGGGGGTTGAAACAAAATTCCAAATATGGCGCGAAGAACACA
TCTAAAACCAAAACCCGAACCTTTAATTTTTTTGTTTTTAATTTGCACGTATATAAATGA
GTTTTCACTTTCTCGAGGTGCACCGACAGTACTTTTTTTGTTCTACGATGAAGCACTGTG
GAAGGACACAGATACACCTGAAAAGAATTTATTTACGAACATCACTGAAATAAATAGCCC
GTTAGCATTTTGAGTAAACAGAAAAGAAAAACACAACGTAAAAATACACACACGGAATCA
GAATAGAACAGCACGCGCGAACAGATTGTACCAAGTTAGAGTCAATGTCGTGCAGTGCAG
CACTGTAGCCTTAGTGGTGTGCGACGGTTCGCGGAACGGCGTCATCTTGCAAACTGGTGT
CCTCCAGCCGAGCTTCCGGTGGCTCCCCCGCTGGTTCAATCCCGTGATCCAACCCCTGCG
GTGGAGTGGTCTGGACGCTTTCGTTGTCAGAGGGAACGGCCACCTTTGATTCACTTTCTG
GCTGAAATACAACCTCCCGTTTGCTGGCGGATTCCACACGTTGGTCGTACAGGGCGGTGC
CGTACGGGGCTATTCCACTCGCCGGCTCTTTACCTTTCTGAGTCTTTGAAAAGACAGCCG
TGCTTGTCTGGTGGTCACGATCGTAGGAATCCATCTCCTCTCGGTGCACCTTCGTGCGAA
CTTCCCCATTCGTAGACTCCGTGCGTCTTTCTTTCTGTGGTTGTTTCTCTGGAAAAGTAA
ACGACGTGTCCTCCCGGGTGTGGTAACGCTCGACCGCCATCTTTTGGGGGGTGTTGTAGA
GAGAGGTAAAGTTACTCATCGGGATACCGAATTGCTCGGAGCGCTGCTCCGACGCTGTCA
TGGAATTATTTTCCATCTCTTCGTAACGTCTAAAGGCCATGTTAAGGCCAGTAAGGTCCT
TGGAGTACGCTAGCGCAGAGGCGATAACGCCCAGAATGACATTGACGCCTAACAAAACAT
ACCCTGTCGAAAAGTAGGTACGCTCACCCCAGTCGGGGGTGAACAGTTTTTGCATAATGT
ACGCCGGAAAGACCAACAGCGCTACCAGCAGGAAAATGCACTGCAGAACCAGAAAGCAGA
ACAATCCAAGTCCGACCAGTCGGTCCATCACAAAGAGCAAAGAGGCCCTTCCTCCCCTGT
TATTACCGTTGCCCATATTGTTTGAGCCGCTTTGGTGGTTTTCACCGCGACGACTATTCA
AGTGTTCCTTCGTAACGGAGGGTAGATTAAACTCTTCAAATTCGGACTCGGCGGCGCTTG
CGGCGAGAAGAGCTTTTTGTTTACGATTCACCAAAACACGCAACACAACGTAAACGGCGG
ACACCACCAGAGAGGAGATAGCCAGTATCAAAGCGATGACGAGGAACGCCTTCACCGCGG
CACCGGAGTAATGAACGACAGAATTCTCGTCCAGGAGGGAGGAGTCCAACACCTTGTGTT
GTAGAACGTAGTAGTACTCCGTCGCCTCTACTACGGGAGGGAGACCGGAAGACCACCTAG
TTGTCTTTGCGAGCGGTACAGCCAACACGACACACTCGAGAATGAGCAGGATCAGACAGA
GTAGCGCAACGCCACTCCTGCCGAACAGTTGCCTCTTGTAGAGGAAGACTGGTGTGTAGT
TTACTCTCGAATTCATTTGAAGTATTAGTGTTTAGTTCTGTTGGGAATAGGAAAAAAGAA
CGGAGAGGAAACAAAGGCAAGTGATGATCAAAGTGGAAGTGGTACCTCTATAGAAGCATG
CGATCTCAAAGACACAAAAAAAAAAAAAAAAAAAAAACAATTGAGGGTGTACGTCTTTTT
TATTGTTATTTTTAAGCGAGTTATGATAATTGTAAAAGAAACCAACAAACACACACACAC
ACACACAGCAAGCCAATGTTCCTACTCCATTTCCTCACGACTTCGCTTCGCGGCGGACGT
TTTGCCTGCAGTCGCCACATCTTCCCAGAATGATGACGGGAGCGTAAAATCTACCCTTAC
CATCCTCTTTTGCGGCGCTACATCACGGACGAGCACGACATGTTCGACATTTTCCTTTTC
CAGTTGGTACCCCATGTGGTGCTCCACCTGCTTTACCGCGTCCCCCAGCACGTCTTGCAG
CTCCGACGAGAAGCAATACACGTGGAAGAGAACCGTCTTGTCAATTCCTCTCTTGCACAG
GCATGTGCCTCCATGGCGTGTCTTTGGAGGGGTGAAACACATCCAGAAATTCTACCGCAA
TCGCCGGAAGATTCATCACCACATGTCGCCTTCCGGTGGCCTCCGGCATCTTTAATTTCT
TTCCGTTTCCCACCACACTATCGAACACGGTTGTATTGAGAAAGTCCCGTCCATCCATAT
TGTAAACAAACATGCGCTTCGGGTCCACCTTGTTCAGCTTCATGTTGATGGGCATGTACT
CTGCCGCGACCGGGTTGAGGTCATTGGCAAACGTAAGCACCCCTTTTTGAGCCGCCGGTA
CCGAAAACGGCCCAACACCCGCCATCACATCAAACAAGGTGTCGTCTCGTTTTAACCCAT
CGACCAGCGCCGTGTGTTCGTGGGACAGCTTACTGTTCCAGTAGACTCGGTTGTACGGCA
CCTGGAAGGTGCACTTGTGTTGTTTAACCGTGGCAGTCAGCATCTCGTTCAGCACACGGT
CTGGAATGGTGTCGAGTGCCGTCACGCCGTACTTGGCCCGCAGATCATCCCTTAAAGCAA
TGATTTCCAACGGGAATTCACGGAACACGCTACTAATGGAGGCCACCTTGTTCACCACCA
CCTTGACGGTAGGATTGCAGTCTAAAATGATATCCCCAATGGTCAGCTTAAAAGGCAAAT
GCTCTTTCGACAGGTTCACATGAGCAATATGACCCACCTCCTCAAACCCACTAAGGGCCA
CAAGGTCCTTTTCCTGTGGATTGTTGTCGTTCAATACGATTTGAAGCAGCTCCGGCATTG
TATAATTCTTATACGACAGTTCCACCTCGACGGTGGAGCACGCGATGGTTACGGCTGGAT
TCGTGATCGCTTGAAGCGCGGCCACGATTTTTTCAGGAAGATCCGGATGGGTCTCAAGGA
AACGGGGCACCGGACTAAAAGACTCTAGCGGTTCTGAGACACTACCCATGCTTGGTGCAG
ACCAGACGGAAGGGTCCATAAGAATTCGCTTCGTCTCTGTCGCCCCTTCAGGTGGTTTTC
CATCACCTTTAAGCACTGTATATCCATTGTTATCAGCCGATGTTATATAGGCGCACTGCA
CATTGCGCACCGCTCTTTTAGCGTATAATAACCCTCTAAAAGCCTTGATCACGTCCCCGG
CACTCCCTACCGGCAGGAAATACAGAGCGCGCAAAACCACCTTTGAGTGAATCGCCTTTC
GGTAAGACGGTTCTGTCATTTCTTTTTCTTTTTCTGTTGTAATTCTAAAACGGAGTGTGA
TGTACACTACCGAACTTGCAAACAGATTGGAAAGAAATCGGGTGTTTGCATTCATCAAAA
AAATCTCGTTACAGAGGAGTGCCGCTCTTCTAACAGTAGAGACACCATAAACGACAATAA
TATTTTTTTTTTTTTTAAAAAAAAAAAAACCGTACACAACAACAATAGTGTCACAACTTA
ACATTTAATATCTAGTAAAGGAGTAAATAAAACTATAATAATGGTAACAAAAACTTGAAG
AAAGAAGGAGTGCCGGCAAAACGGCTGATTATGTTTTCCCCCTTCCATCTCGTTTGGTTC
TCTTGTTTCTTGCTTTTATTTTGTGACTTGAGGTTGTCTCTATTATAACCAATATAATAT
ATATATATATATATATATATATATAGATAAGAATTGTGGTAACAACAACAACAACAAAAA
TACGATGATGGTCTCACAAAAACGATGATAATAAAGAACGGTAAACGTTTCGCCACTTTT
CTTTCTATTGTTATTTGGCTTCGGAGGAGCTCTCCTTATTGCCGCCGCTCCGCCGTGCGG
ACTCACTGGATAGAGACGCGTACCGGTTGTTCTTCTTGGGGGATGTGGGTCGTGCACTTA
ACGCATCCCGCGCCTTTAAAAGAGACGGGGGTGGCTTCGTCTTGACGGAGTCGTACGTGC
CTTTGATTTTTCTAAGAATGTAGGTCGCCTTTTGTCTTACGTCATAACAGTTACGTCTCG
TTTCCTCCGACGAGTACAGGGGCGGAATCTCCTGCTCCGTTTGGGTCATTTGCTGCAGAA
ACTGATGCAAGTCCTGTATCCCTTCCTCTAAAAACCGTTGACTGGAGGAGTCCACGAAGG
TTTGTCGTACAATCATGCGTGTCTTCTTTTCGACGTCCGTCATAAAGTTGTCTAAAAAGC
TACGCGTAAACTCCACACACTTTTGGCCAAGGGCGGCGTCCGCGGCGGCACCTTCCGCCG
TCGAGAGGCTATTCGCCCGCAGTCCGGGAATCTGACCAGGGTTGGTCATGGAGGTACTCG
GGGAGGCCGAGGTAGAGCTGCTGCGGCGCCGTCTCGCACTCGTGTGCGGCTTTTCGTCGT
CCTTGTTGGGGCTAAACGGGCGGGCCTTGGGAGAGCGGTTGCGGGTGCTGGTCGGCGCGG
CGGGGTGGCCCCCGGTGCCGGGACGGTTCCTGGGAACACTGTTGCTCACTCTCGGGGTGG
TCGTGCGGAGCGGCGTCTCCTTGCTGCGGAGGCTGTCTTGTCTCTGATAGGAAACACTGG
CGGAAGCGCGACGGGTGACAGAGGCAGACCCTCGCACACTAACGGACTCTCGCCGAATGA
TCTGTCGTTTGGCACGCTTCTGGGATCCTTGCTTTTCGGGGTCCACGTGGTGCTGGATCT
CCGGCTCCTTTGACACGGAGGCACGGCGGTTGTTTCGGGCTTCCGAGCTCACCTTCACCG
CATCGACGCGCTGCCGTGGGGAGCCTTTCACCTGCTCCGCCGCGTGAACGACTACCGGAC
GCTTTTCGTCCACATGATCGCGACTGCCGCGAGGTGCCTCTACCTCGTCGTCGGAGACAG
AGGGGGACTTTTCGTCCAGGTTGTTGTAATAGTCATTCAAGTTATTGGGCGTCTCAAGTG
GTTCCTGACCCGCGGGGATTCTCGGTGCAAGACGGCTCTTGGCAGGCAACCGGCTCTTTG
GTGGCTCCGCCTTACCGCTATCCTCCTTGGCTGCGGCCGGCGTCACCTTCACCTCATGGG
AGGAGGACCGGCGAGGTTCGACCGCGCTGGTCTCCTTCGGGGCGGCGTTGACCGGCTCGG
GGGTCGGAGCATCCGCCGGTTCTGTCCGCTCGTGCTTCCTCACCTCGGTGCTTTTCCGCT
CCGGTAAGTTGCTCTTCTTTTCCGGGGATGGCTTAGGGGCCTCCTTTTCCTCCACAACCG
TTTCGGAGCTCTGAAGGTAACACGCGTTGGTTTTCTCGTAAATCTCCTTGGGGTCGTCGC
GGTAAAGGGCGAGATGCACATTCTCTTCGGGAATCAGGCAGTACTGCTTCTTGTAGAGCG
ATATATAACTCTGGACAATGTCGCTTGCCTTGTGTGCATCCGCCATGTTGCACAGCACAA
TATCCGACACGGTATTGAAGTCTGATTCGCTGAGGAGCACCACGGTATGCTTATCGCCAC
TGGTCTTGACTTCACTCGCATTTTTCACGACTTCCACTGTTCCCTTGAAAGACTGAATGA
TCCCCTCGTAGATGGACGCAATGGCGGGGTCTAGCATCAGAAAACGAAAGCCAGTAAAAA
CAGACGAAGAGGCGGGACTGCCGACGGAGAGGAACTCCGATGCCGAGTAGAAGGTCTGGA
CCGGACGGCGGTAGTGCGTGTTCCGCAGCGCCAAGGAAGCCGGCGTGGGGGGCAGTGGGG
ACGGGAACTCGGTGGGCATTAGGGTGTCATTCGACTTGAGGTCCTTCACAAGTGACGTGA
GGTATGTGGTGGTGACGAGCGTGTAGCCGTACCCAAGGGCCTCCATCATGGACTGGTCCA
TGGCAAACTTGTCGGGGGCCACGTAAAGGAAGCCGAGACAGTTGGTGTGCTTGTCGTAGT
ACTCCTCCGGCGGTGGAACACGCTCCTCCGTGACAAAGGCGCCCAATTGAACGGCACACT
CAATGACTTCCTCCAAGGCCTCCACTGGCATGTCAGGGGAAACCGCGAGCACTAACGTGA
CGGGTACTAATCTAGCGGTGACCTTGATCCCAAACCGTATGCGATCCTCCGGGTACACAA
ACCTGGAGTTGTCCTTCCCAATCCGTTCCTTGTCTACAAACGTGCCGTGCTTGGAGAAAT
CTTGAATGCACACTTCCAGGTGCGATTTGGGATCGAAGACGGCGAACTTTTGCAGCGCAC
TAACGACTATGGTGGCGTGGTGCCTCGAAATGGACGGTTCACCCCCCGGAAGAAGGAGAC
GGCACTCCTTTCTCCCGACTTCATAGCTTTCCCCTGGAAGGAGAAAGTAGTGGTGGATCT
CACCTCCGCCGTGATTGACTTCCAGCAGATACATTCAAACGAAACAAACAAACAAAAAAA
AAAAAAATCAACTAACTATACTGTTTACAGAAGAAGTAAAGGAATGAGGGGGAGAAGTTG
GATAATATCGGGGGAAGAGAAAGATATCCACAAACACACAAAATTCCCACTTGACCTGAT
CGGTAATGCAGTCTTGTAAAGATTCGCTTGTAATATACAGATAAGAAGAAGGCAGTGATT
CTTTGGCCTATAGTAGATTCATCGCCTCCAACTCACTCACGGTCGGACTGCCCAGGCGAT
AATACACGCTCTGCACCCGGTTCATGAACTCCATGGACTGGAGGAATACCATTTCGAATG
CCATCCGCTTTAGGGCGATGGCGGCCATGTGCTTCGTGTACTCTGACAGGCCGTCTCGCT
CCTCGGCACACATGAGCTCCCACAGCAGTTGACGGATGAAGAAGGCCTTCTTTTCCTTAC
TCTCGTAAGGTTTCCACCCAAAGTGGGCCTTTATTCGCTGAATGCGCAACGCGTCGTACA
TTCGGTCTCCATTGGTTCGGCCCCAACACTTTTGCGTAAAGTTCGTCAGAATACCAGCGG
AAGCTGGGGGAAATATCTGACAGATGAGTCTGCTCATGTGGTACTTCCACATGCGCTCCC
CGCTATACCAGAAGGAGAGAGGGCTCTCCCCTTGCAGGACGTGGGACAGCGCCTGGTGCG
GCGGCTCGCAGAGGTGGAGCAGCAGCGCCTCCAGTTCCGCACGTCTGACGGCGTCGTCCA
CGACGTGCAGGTGGTCCATCCCTAAATGATAGGTAGCGTAACGGTACAGCGGCGGGCAGA
GATCGTACAACTCGTTTAGTGTTTCCCGCGGCTCCCAGTCCCTTGTAGACGCGTTTGCCT
TTCGGTGAGACGCATTAGGGATGGATTTACGAAACGGAAGGCTGCTCCGCGCGTAGCTCG
CGTACAGATAGAGAAAGTACTGCCGCGAGGTGTGGTCCCTATCCCCAATGTGGACCCCTA
ATGTGGCGCCTATCGGCTCCTCACACAAGTGACAGTACCCTCTTTTGATATCGAGCCACG
CCTGCTTGTTATTTCCTTCGTATATTTGGTGCGGGTGGTTGGCGTAGGGAGAGGAGTCGC
ACACACCCAACTCCGTACTACTAATCTTTCCATAGGCATTGTCCACAAACGTCATGTTTT
TCCGATTCAACGACAACAGAGAGTTGGTGGCCAGGATTTTCTGCAAGTCCACATTGACTG
CTCGGATGGGTATGGAACTTGTCCATGGCTTCATATCTGGGCTTCGTTGAAGAAAAAAAA
AAAAAAGAGGGGGAGTGAAACGGTGGTGAAAGTGTACGGTGTATAGCGGTCGACAGACGT
CTCTCAGGTCCTTTTCCAAACCATAACGTACGTGTGAGTGTGACCGTGGTCACACTTTAC
ATTAAACCCCTCTTTTATGCTTTCGCGTTGGCTGCATAGAACTGTGTGCTCTTGACCAGC
CGGAGGTAACTCTTCCACCCCAGGATGCTGGGTACAATCAGGTAGAGTACGCACCCAAAG
AAAATGGCAAACCAAAAGTACAGCAAGTGGTAGGGGGAGAAGGAAAGCTGGTAGTCCACC
TCCAAGTTAATCGCCCCACTGATGGCCTCTTGGCCGAGGTACACCACCGTCCCGTACGCC
TGCGTGACACAGGTGAAGAATTCCAGTGCATCGCGGCTGGGGTGGCGGGTGACGTAGGCC
CAATAGAGCAACACACAGATGGGCCCTTTCACAAATAGTTCCATCAGTGACACCACATGC
ACCGCGGACCCGTTAAACGTACCCAACACGTCCCCGTACCGCTTGTCCAGTTTGGCATAG
TTTTGCGCGAACAAGCGGTTTGTTTTGAACACGCCAACACAACCATCCATCAAGATGTGA
ATGATGAGCCCGTTCAGCAAATACCACCTCGCCCGCGTTCGCTCGCCGTATGTGAGGGGC
TGGAAAGTGGTGCGTTGCGCTCCTTTTTTTCCTTTTGGGTTTCGTTTTTTCTGTCGTTGC
AGAAGGTGCCCAATAAGCCAGCACACGGGCAACGCAGCGAGGGAGAAGAACATGCTCGGC
TCCGAAAAGTACGCCATCACGTCGTCGGTGGTCAGTGTTTTCCACTCCACCGCCAGCGGT
GTCAGCACGCACGAGACACAAAACAGGACCATCGGGTCCACGAGCACTTCCAAAAACATT
GAGAATGACAATTTTTTTTTTTTTTTTGTTACTAATCAAAGGGAGTAGTACAGCATTCTT
TTCGGAGTATGCCATAGATACAAGAAGAGATGAACACAAACGTTTCGCTGAACAGCGTCA
AAAAAAGGTCTTTTTATTTTACTGTCGGTTTAAAACAGAAAGGCACATTCTTTTTCGAAT
ACCTGTCGTGCATTAATATTTACTCGCATATGTTTCATGCAGAGCCTCCAATATCGCTCC
CGCTCCTCCTCCGACAAGAGAGCCTTGTTCACTGGGACGATGCTCCCGTCAGGACTAGCG
TTCTTGTAATACGTGTGATTATCATACGACTGTCGTTCAGTCTCGGTCAAGTCCTCATCG
GCGACCGTGAGGTACGGGGGGCAGTCGTCTAATATTCGCGGGACAGAGTGAAAGGCCGTT
CGCGACGGACCGGCAAACGCCACCACATCCCCACTCCTCAACTTGAAGGCGTAAGGGGTG
TCCTCCCTACTATTGGTGCCCATCAAAAAGATGCAAGAGCAGCCCAGTGAGATACTCATG
AGTGGACGGGTTAAAACCTGCTCGCTAATATCCTGGTGACACATCATCATCGACCCGACG
GGGTAGTAATTCACGATAGCAGTTTGCGGTTCGTAGTGTTGAGTTTCCACGGCATCCCCG
GGAGCGGCGGGAAAGAGCGCAAAGGAGTCTTGCTTCACATGCTCTACCAAGCTCATGAGG
CCCTTCATCTTGTCCTTTATCAGGGCCGGAAAAGGTGAATACACCCCTTCGTTGTACGTT
TTGCTGGTCCACTCGTAGCTAAAGCCAAGCGTAGACCAGCGCATTGGTGGTTGATAACAC
GTCGTCGCCATTGGGTTCTTTGCGTGTGTACTAAGTATATTGGGGTGCTGGGAGGAATCC
CCGTAGCTAAGAACCGCCTCCCGGCACAAGTGCACTTGCTCCTCCGGTGTCAAGACTTGT
GGGAAAACAAGCAGGCCCGGTACACCGGCGAAGGTAAAGCACGTAAAGCGATCGGTGCCT
CCATTCTTATCCACTACTTTATGAATGAGGTTGCGATTAGCCTCTGTGTTAGACTCCACG
TTGGAAAAGTCCACCACATCTACAAAGTCCGTCGGAGGGGTTTCACGTCTTTTTGCCTCC
CTTTTGGAAAACTGGTACAACTTGTACTTTTTTTCTACCTGACGAAACGGCGTATACGAC
AGCTCATTCTTTTCCCCGTTTCTGCACTCGTTTGGGCAAGTTTCTTCGCGGTTCATGTAC
CAGAAGCAAAGTCTTTTCTAGAGAAAGGGGGAAAAGAAATAAATACGCAGAAAGTATAGG
GTGCGCTGGTCACGTGGCACAGAAACGTGCGCTCGAATATAACTGAAATCGACACACACT
CACACACTACCACAAACTGAAAAGTAATAAAAAAGACAAAGTAAAGGACGATTTCGCTAA
CAGATATCATAAAAAAAAAAAAAAATCGTGTGCTTCTTAGCAATATAGTTTTGTTGTTGT
TTTTTGATTGGTCTTAGTAGACGGGATCCGTCAGACCAGTGTTTCTCTCGGACTCGGCGA
GGGTGATGGGTTGGCCGTCCTTGAAAAAACAATCATAGCTGTCCGAAATCGGGTCGTGCT
CGAGGGCGATATCGGCGCGACTCTCTCGAAGCGGCAGAGGTGGCTCACACTGGTACCCTT
TCGGGTATATCAACTCTTCACTAGCGGTTCGCTCAAAGGTGGACCCGTTGGAGGTGAGAA
ACTCATACCGCTTCTCCTTCCCCACGCCTAGGAACACCCCGTGAAAGATGTTTCCAGAAA
ACTTGGTGTTCTCCACCCTTGCACTACATCCGACCCCCTCATAAATCCCTCTCACACAAT
TACTAATAGAAGAGAAGCGAATGTTGGCGGTCGATTTCAGTCCCAGATAAACACCATCCC
GTGCGCTAGACAGGTGGCAGTGGCGCAGGTATATTTCACTATTTCTTGTCACATCAAAGA
GGGGCTGGCTCGTTTTGTCCACTAGTGTCCTCCCCGCGGACGACTGCCGGGTGAAGGCGT
GACCCCCTGCATGATAAAAGGAGGTGTCTGACGCGGAAAAGGTGGACTTGTCTTGCACTA
TAAACCGCCCAATAATAGACGCCCCGTTTCCGTTGATGGAGATGTTGGTTTGCTTGATGA
CAATCGGGGTAGAAAGAAAGTAGACCCTGTCCTTTTCGAGGGTGACACGTGCACCGGGTG
TCTGAAGGGCACGCATGAGCTCGTTACTGTCGTGTGGGACAAAGAATCCACCGCCGCCAT
CAATGTTGAGGTTCATTTTGCGAAGTTCCTCCGCGTGCTTCACCTTGTCGACAAGCTTTA
CCAAGTCGCTCACCAGCTGCTTGTGCGTCGCCAGCTCGCTCGTCAAAAACTTGATGTGCT
TCTTTAAGTCCTCAATACCGGCATCTGAGGATATGCCTCTTAGGCCTACCCTGATAGGGA
GCGCACCCAGAAGACGGGCACTTGGACCTCGGAGGCCGCGGTAGAACATTTTCATAGACT
TGAAGGCTGAGGAACAAAATGCGATAGAGGGTGAGAGATTGGTAGTGCGTGCTGTTTGTC
GGCCATAGGTCCATGAAAAGCGCATCAAAAAAAAAAAAAAAAAAAAAACGAAACAACAAC
AGCAAACACTTGTTGCCTGTATACAATTACAAGTTCAAAACTGAAGAAGCTTGAAGCCAG
TTTTCTGTCTCGTCGCCCAATCGGTTTTTAGTCTATGCTCCCAATACGGGGTCGTCTTGT
TATTGGGGAATCCGGGCGGGAAGACGATTTTCACCGTGTCACTAAGGACCTCCTCCTTCA
TCAAACGATCCGACGTCGTGGTCACGGAGAGCGACGGGGACGCATTGACCTCGATCAAGT
GCGGCTTCACATCCTCGTCGATGAGAATATCATACCCGTACAACTCAAAGGAGTGCTTGT
CATTAAACATCACCGTGTCCATCGCCTTCAGGGAGTGGTAAATGAGGAATTCTATACTAG
TGGCGAGACCCTCCGCCACATAGGCGCCGTACCGTCCTTGGATGTAGAGGAGCACGTTGC
GGAACGACCACTTCCCTCCGTGGGTGGAGTTGTAGTGTTCGTCGCCTTTCTGTAGGGCAA
CGTTTGTGAGATGGGACCCCAACGAGTCGTCCGAGAAGTTGTCCCCTTCATAGCGTGTCG
CACAGAACCGGGCAAACCCCTCGCGGTGCAGGTAGGCTACCAGCGGCTTAAAGGAGGTCA
CCAGGACATAGAGGCGCAGGTCAAACTTGCGCTGTCCAATCAGTAGCGGTTTCGCAATGT
ACTTGCTCACAATAAAGGAGCCGAGCATGTTTTGAATCTCCTTCGAGGTGCTCGCCGAGG
GTAGAGGGGAAGAGCTCCCGGTGAGCCCTGGGTGGGAGAGGATCGTGTTCTGCGTGTTTT
CGCGCTCGGCGTCCTTCTTGTCCTTCATCCAGCGTGTCAATTGTTGAATGCGGTTGATGA
TAAAGATACCCTTCCCCTGAGACCTAGACGTTGGCTTTACAATCCATGACGTCCCGGGGC
GGCGCTTGAACTCCTCAATGAACATGCTCATGTCGTTTGGGAGGTTGTACGTGATCGGCA
CGCCGTCGGCAAAGGCGTACGTGGAGGTACACCGGTCGAGGGAGGCGCGGCTGCCGGGGT
TGGCGGACCAGTTTTTGGCCAACACCAGCTCCACCTCCTTATTCTTTCCGGAGAGCTGGT
ACTCCCTAAGATACCGCTTGATATTCTTGTACATGAGGTCCTTGCGGGTCAACTCGTAGT
GGTTGGGAAAGTGGTTCACAATTTGGTTGTCTTGCAGACGAAATTCCGCGGCGGAAAAGA
CAGCCCGTATACGCACCACACTCATCCAGAAAAAGTTCCACTGTCCCAAGTGCGTGTCCA
GGTAGCGGTCATCGGGGTTACTATACTGCACGACAATCTCTTCGCACTTGGGCATGTTGC
GCTCGAACATGAAGTGAATCACCGCCTTGTCCAAATCGGTTCTGTATCGAAACACAGTAG
GCACATTTTTGGACGCCGTCGTCGACGCAGCCGGGACTTTCACATGTCGGCGACCGGACG
CAAATGTCGCGGCGGCCGCCTTTTCGGCCATGAAAGTCCTGTTTTCCTGTGCGTCGTCAT
TAAACTCGACACGATCGTCATCTGAGGAGTCGAAGGTTTTTAACATTGTGCACCTACAAA
AAACAAAAAGAAAATTGTACCTTTCTGAAGAATAGAGCGATAGAAAGTAAACGTTTGAGT
CCAATCAAAAACCAATACTGCAAAAGAGGCGGCGCCGATCGTAAGAACAGCCCTTTCACA
TCCTCACACAGGTAAAAAAAAAAAAAAAAAAGCAATTAAAACTGGTAATTAATTAATCGT
TGTTATCTGCATCGGATAATAGTTTTGTCACAACAGCGGGGTCTCCAACGAACTGCTGCA
ACATGCTAATAAATGCGTCATCGACTGGAGAGTCGTCGCCGCCAGCTTCCACCTCACTTT
GAAGTAAGCCTTTGGTTTCCTTCTGTTGTAACCGGTTTATTCTCCGCTTAATTCGTTTGA
TCTCCCTATCCGTCTGATCCGCATCCCGTTTTCGCTTTTCGCGAACTTCGCTATCCCCAA
GAGTTTTGGCTAACTCCAAGAGTTGGTTTATTTTCTTAGATTTGGAGTGGTTCTTTGTTT
GGGATGGCAAGCCCACTACCCTCGCACCGCCGTCTTTGGGGGGTGTCCCACCGTCGAGGA
GGGCCGTGTAACTGTCCACAAATTTAAGTTTCGTAAGGGAATACCCAAAGTGAACATAAT
CGAAATACGGAGGAATCGTGATGCGCAAAACGACCGGCGCCACCGATTCTGGTTTTGTGA
GCCCTTTCTTTGCCTGTCGGTGCTGCTCGTAGCGCGATTGACGCTTCGCCGGCGGGTTGT
AGTTGAGGTAGACGGGGGAGGTGAACTCCCGTAGGAAGGATTCACTCGGGGTCAGGTGCG
CGGCGCTAACACTCACCGCGTCCGTGGCGGCGTCGGCGATCTGCAAAATGTCATTGCTCT
CTAGCAGCTTGCTCGACAGTAGTCTGTGTTTGGCGGCGCTCCGAAGCGTGGTGCTGATGG
ACCTCGGCAGGGCCGACTCGGAAGGCATGAGGGCGACATACGTCTCCAAGGGGCTAAGAG
GGACGGAATTCTCCACAAAATTCAGCCGAATCGGCTTCCCCTTCCGTTTGCAGTGGAGGG
CTGCCGCTTTCAAGTGGCTGAGGGTCGGCGAACCGGACGGGGGAATGTACCGGTAATCCG
GGCACACACCGGTGACGACAGAATAGAGGGACCACAGAGCGGACTGCAGGAGGTCCATCC
CAACCTTGTGAGACGCCTCCCCGGTGTATTCCTGCGCCCCCAAGATATCCACAAGGTAGT
GCACATCAATGGAGCACAAGTCGGCGGACACTAGCGATCGGGTGGGATGAGAAGGAGCGC
AGCGTGCGATAACGACGCCACAGCTGCGGCGCTACCTCACCCACTCCAACATAAAAGTCG
CCTCCGTTCAGCAGAAAGAGGAACGCAAAGTCTACGCGAACGGACGGCAACTGAGGGATC
GTGATGGCCGTCCCATCACCACCTACGGTGGAGGAAGAAATAAGCCATCGGTAGAGGATA
TCCCCCACGTTGATCAGTTGCAGCGAGGACGGGCTGATGACACTAATGTTATGATAAAAG
GTGGCTCCGATGCAGGTCAGAACGAGATCAATATCGTTACCCAAGACCGCTACCTCGTCA
TCTGGGTTGTAGACGGTGAGACGACGTAAAGAAGGATTGGCGGCGTCTTCCTCGGATATG
TTGCCGGCTAAGAAGGAAAGCGCGCGCGACACTTTAGCCTCCCCTTCACCGGGGACGGTA
GACCCATGGAGAAACACGGCGCAATCGTGTGTGAGAAATCCACGCCCATCGTTGCACCGG
AAGGTCTCCGCCAGTAGGTTCTCCAGCTCCACGAGAAAGAGGGACCCGGCGGTAATATCG
AGAGACGACAAATTCTGTGACACGTCGCGCCGCTCCGCTTCGCTAATGAGAGACACCTTC
CGCCGGCGGAGTCGCTGCGTCTGCAGCTTGGCTATAGGGGCAGGCCCATCAATACAAATC
GTGAGAGACTTGCGTGGCTCAATGACCTGGGTGACTAACAATTTGACTCTTTCAATCACG
GCGAGCATAATTTCCCTTCTAGATTTGGTCGCCAAATTCTCCTTATCGCAGCAGCTGTGA
ATAATACAGTTCATGTCAATGAGGACGTGGTCGACGGTGGCAGGGGTCCGTCCAGCAGGG
TCTGCCGTGCCGTCGTCGTGGGCGCGTCTACGGGTAGTCTGCTCCTCCATCTCGTCCTTG
CTCAGTGGCACAGGCAGCAGTCGGGTGCACCCACAGGAGTCTATAAACTTTCGTAACCCT
AGGAGACCCATTCTAAAGTCTTATAAAAACTGTGAAACAGTAGAACAGAGGAAAAGAAAC
GTGGGAGAAAGAAAAAAATATATATAGAGTGCGGACAATAAAAATACACACCAAAAAGAA
ACATTCCAAAATCAGCGAATGAGGATAACACGCGTAGAATCGTCGCGAGCCATATTCCGC
ATTTTACACACTCATCCTCCCCGTACTACAATGACACCTCGTAGCTATCCTCTTCCTCGT
CCTCCTCTGCTGCCTTTTTTTGCCCCTTCTTCTTCTTCCCTGTTGGCTTTTCTTTTACTT
TTCGCTTTTTGAATTGGGCAGGTTCGGCCTCATTGACCTTTCGGACTGATTCGTCAATAT
TCTCGTTTAGTGCCTCGCTCCTCAGAAAATCGTCATTGTCTTTCCCAGAAAAGTAGTCGG
CCACGTCGTCGACAGTGGTTTCTTTTTTATGCTTGGAGGAGTGGTGGCTCTCCACCTGCT
TTCGCTCCATTGCCTTTTTATTGTCCAGCCGAACCTTCTTGTAGTACTCCATCCACTTAT
GGAGACACTCCGTCAGCTGACCTGTAGACCGCATTTGCCAGTCGTTCTCGATCCGCGCGG
AGGCGGAGAAAACATTGGCCAACTTTTTTTGTAACACAAACGGTGGCGTAATGCCGTTCG
CGCGGAGTATTTGAATGCCCAAGTAGGCCAGAACGGAATTCCCGGTCTCCTCCCCGATCG
CGAGGAACAGCTCCGACACCACGCGGCTGCGGTCGGACTGGGAGCTGGGTAGTCCCAGGC
TGGCGTTGCCTCTGCCGTTGGCTAGACTCAGAATGAGTCCCGGAAGCGACACTATGGTCT
CCTTTTTTTTGGCGGGATGAAGTAAATCGAGACTAAGCTGCCGAAAAAAGGGAAGATACA
CGTCGCGGTTAAGACTATACTTATCGCACACGCTCGCCAGCGGCATTACTTCCTCTAGCC
CGCTGTTAAACTGAACCAATTTCTCCGAGAAAAGGTCCCACTTCTCTTTCCCCATCGCCT
CTGACATGGTAGTGTGGTTCGACAGCAAGGCGGTGGTGTCGCCAAAGTACTTGGTAAACT
GTGAAGCCAATCCGTGATCGGGGGTCGCGGGGACGGCGGTGAATAAGGAGAACTCCACCT
CCAGCATGAGAAACACTAAATCCACCAAAGGGGTGAACAAAATGTGATAGACGACGGTGT
CGTATACTGCCGTCTTCTCCCGAATACACGTGTCTAGTTCAGCGGTTGACATTTCTTCCG
CGGAGTCGCTCGTCAGTCCGCCGGTCGGGTCCTCGAAGAGGTTTGCGTCGAGGGAGCCAG
TGCCCTGCTGCTGGAAGCTTTCACTCCCCATTTGGTTCACGAAATCACTTGGAGAGGCGC
GCTTACGCAGCAGGCTCCGACTCACGGTCATTAATCCAACTGTGTGCACCGTCCGTTGAG
GTGTGGGAAATACTCTGGGGTGCTTGACATATTGGAACAGTCTTCTTTTCATATCTGCAT
TCACCACGACGCCGTGTGTGCTACCTGCGTACTGGGGTTGAATCCGTATGCGCTAAAGCA
ATAGAGAGAAAGAGAGGGATTTGCACAAAACATTACGGTCATATAAACCAGTCGTTCTGT
AAATTAAAGTTTACTTCATCATTTTTCATTTTTGTGGTGTGTGTCACGCCGATGGGCAGG
CGCCGTCTGCCACACACTTCAAGCTGTCGTACACACTTTTTGCGTCCTGGACGGGATTGT
CGCTCGTAACACCGGTGCTAAGAGCAATCCACACGCGCCTCTGAAGCACGATAACCCGCA
CGTAAACATCTAACGACATCAGTGCGTCGCCCTCAGACAGAACACGAATCCATTCATCTG
CTAGCTGCTCGGTTTGCTCATCCGACAGAAAGCTAAACTTGAACAGTATAAACCCAAAAG
AGGACGAGCTAATCGAGCAGTCGAACCGACCGTCCGCGTGCAATAGCTGCTGTAAGGTTG
CCAAGCATTGTTGGGTGTGTTGCATTTCCTTTTCGCGGTCCGAGCACAACAGGTCGACAG
AGAGTTGCAGAAGGCCGTTGGGACTGGCCGTTGGTAGGGCGAACCCGAAGGCGTCGTCCC
TTGCGGTGTCCCTCACGTGATTATAGGAGGTACTAGTTCTAGCTTCCAACAAGTCTCGTT
GACAGTACGCCACTTTCCTCGTGTCGGCAACGAACAGACACACGGACGACAAACTACCGG
GGGAACGCGCGAGGCCACCGGGGAGAGCGGGGTTGGACAACGCAACACACACAGAGTCCG
CCTGGGAGAAGGAGTGCCCCAGTGCTTCCCCTTCTTGTTGCAGTAGTCCAAAGATACCGT
AACTAGCGTCAATATGAAACCAAACGCCTGTCGCGGCGCAGAATTGAGACATCTCTTCCA
GTGGGTCTACTCCACCACTACACTGGCTGCCGAACACCCCCACCACCAGCGCAGGGAAAA
GACCGTTTCCGAGGTCCTCCCCAATCTTCTCCTTCAGCTCTTCCACAGAAAGACTGTAGT
TGCGGGCCGTCTTGTTCACGACAGTCAGAAGAGTCCGCACGTGCACAAAACCCAAAAGAC
GCGCGACCGCGGTCAGATGCGGGTCCACTTGGTCGCTGCAGTAAATGACCAACTTGTCTA
GCAAGTCTGATCCACCGGACAGTCTGGTGCGACTACCACCGCAACGGTAGAGCCCTTGCG
ACTTGACGGTGTGAAGAAGTGCGACGTAAGACAAGGTGATACTATCAAACAGGAGTCCCC
CTCCCTGTTGTGGCACGGCACGGTTCCCCTTTTCGAAACTATAGACGGCGGTGGAACTTG
TGATGCCAGCCAAAGAAACCGAATGGGTCGCGTGCGTGCCGCCTTTGGGGGACCACAACA
GCTGATTTATATTGTCTCCCGACTTTCTTCCACCCGACGAGGTGGGCCACAGAAACTTTT
TGGGTAGGGCAAGTCTGCCCGCAATTGTATTGGTGAGTGTCCGCTGCAATTCGGCACTGT
GCTGACCAAAGACAGGGGTGTTGCAGAAGGACAGCTTTTCCGCCGCCAAACTGGCAAACG
TACCAAGGTGGCGGCTATCACACGCGCCAAACATCAACCCTAAACGAGGGAACCTATCAT
TCAGCAGCCGTACCACGCACTTGTGCAGCGGTGACTCTTGTGGGGCTGGGCGGCTCGGAA
ACGCGGAGAGACAAAACGCCGCTCTCGTGTTCGAAACAGACTCGGTGCACTTTTTTAGCA
ACTCAAAGCATTTCATTCACGCAGGAAACTGAAACGTGTAGCCTCACAAGCGAAGGGGGT
CAAAACAACAACTAAATGTGTGAGCTGGAGGAGAAAAAAAAAATAGGTAATTACACTGTA
CAGGTACATAAACCAAAAAAACAACCGGGCAACTACTCTTCATCAAACCTCTTTTTTTAA
AAAGTATTACCATTAAAAATTAAACGGGAGATTATACTGGTTATAGAGCACCAAACAGAG
ATGTTGTCAATCGTCGTCGCTGCTATCAAACGTTTTACGCTCATTCTGTGGGGGCTTTCC
TCTCGGGTGATTCAACACACCCTTCACTATCTTTACACGCTCCTTCTTGGCATTACTCTC
GTCCTCTCGCCTATCGTACGAGTCGAAGCCGTCATTCTCCGCTACAATACCCGTCGTTTG
ATGCAGCTCCTGCAAGGAGGGCGGCGGCCAGTACTTTGAGTTTTCAACAACATAGAACAT
GGGGTCGTTAGGGATGGGGTCGAACTCCTGCGGCTTGCTGGCCGCATCGGAGTTGTCGTA
CATGGCACTGACATTCACCTTTGGGTTAGGAATCTCAGATTTCAGTGGCATCTTCACGGA
AGAAAACTTTTTCGCCTCCTGTGCCTTGTTGGTTAAACGAACCCTCTGTTTCTTTTTCTC
CGCACCCATACAGAAGGAAAAACTAGTCGACTACACTTGAGAAAGTGAGAATAAGAAAAG
GGGAGGGGAGAGTAACAGTTCAAAAAGCGGTTACAATCAGAGGAGAGGATGCGTTAATAG
AAGAATGAACAAGTAGCACTTTACCATAGGGCATTGCTGTTAGATGTTTAAAAGACGGAA
ACATGTGAAAAGTGGATTAAGAAGTCAGGTATAAAATGACCAGTAAAAAAATGATGGCGC
CCATGAAATCTGTGGGCAGATACATTTGCTTCTCATGAAAGTCGCGTTGCTCACGGCAAC
AGGGGACGTTGGTGGAGACAAAGGGAGGTGACGCTTCGCTAATACACTCGTACTTGGTGT
ACAGAATGTGGTTCGTTTGGTTGAGCGTGGCGTGCACCAACTGTGGCGCCGCAGAGGAGA
CAATAAGCCAGAGCGGAAATAACACAATTTGGGAGGAGAGTAAACCCACACTCCACAACA
GTCCATCCACCGGGGAGTCCTTCTTGAGGATGCCAATCCACTCCTTCTGCATCACCGTCT
TCCGTCCCAATTCCAGACAGACGAGCGGCATGAGGGCTGCCCGCTCGGGGTGTTGGCAAA
ACACGGAGAAGTAGTGCACCATCGACAGTGTGAATAGAGGGGTAATGGTGAGGGTTTCTA
CCAGTGAAAAGTGACGGGCGTGCTTCTTGTCAAATCGTTTGGGGGTGTCTGCTATGAAAA
GATTATGGCCAGCCAACAAATTCCCCAGGAATACGCCTCCCTCATTGGGGTACCAGCTCG
CGAATCCTTTCAACTTTTTGGAGAAATCTCCCTTTTTGGCTAGTGATACACTGTTCCGCC
GCAACATTTCTGTAAAGGAGGAAACAAAAACCGATTGCTACTATCCTGTAGAAAGTAAAG
GAGAAGGAGGGAATGAAGCAAGTGCACAACCTATCGGGAAACAGCACGACATCCAGCACG
AGGAAAACACAGAAACGACGCGTTTTTTTTTTTTTGCAAAATGAAAGAAAACAAACAAAA
TTGGAAATCTGACCTCTTTAGTAGGGAATCATAGCCTCGTAGTCCTCAGCGCGGCGGGCA
AGGATCTCCACGTTCTTGGGGCGGACCATACCACCGTTGCGGGTGCTCTTCTTGAGGGCG
GGGAGGGTCTTACCGGCCTTCTTGTCCGCGAGGTACTGCTGGAACTGGTGCTCCTTGGCC
TTGAAGGCCTCCTGGCAGCGGGACTTGCGCACGTGCTCGAAGCGAACACAGATGCGCTTG
CGGATGGTGCGGTTGCGGACGGGCTTGTTGATCATGACGCCGACGCCACGGGGGGTGACG
TTCCAGACGATACCAGTACGACCGTGGTAGTACTTGTGGGGCATACCCTCGCGCACAGCG
GCATCGGCCACCACGTCCACGTAGTCACCGACCTTGATGTTGGTGAGGATGGTGGACACG
GACGGGACACCGTGCTTGCGGAACTTCTTGGCGAAGAGGTGGCGAGTGCCGCTCTTGTAA
CCGTACGAGTGGACCATTGGTTCCTTGGTAGTATTCCTTGTGGTGGTGTAAGAGAAAAAA
AGGTAACAGTATGGGCACTACGGTAGGAAAAGAAAAATACAACAAAAAAAAAAAAATAAA
GTAAAACACCAGGGAATAATCAAATCAGGAGGACCACATCTGCCGGTGCCCCATCGCAGT
GAGGGTTAGAAAGAGTTTAGGCGGAGTTTTTGGAGTGTGTATTCGTTTAATTGCTTGGTG
AATCCCTCGTTAGGGCAAACAAAGCAACGCGCCTCACCGACAAACTTGACACAGAAGGTC
ACCATTTGCTTAGCGGTAGACGGATCAGCGCAGGACTCTTCATTGGTTGAAAAGAGCAGG
CCTGGATGTGCCTCCTGCAAGTATTCCCTCATCTTTTCGCTCCGCACTGCTTCGAAAAAC
ACGTCTAATAAAAACGCCACGAGAATGCTAGTCGACCTAGAAACACCTGCCATGCAATGC
ACCGCGACGGTCGCCTGTTCCTTTTCGGAATCAAGCGGACTACAGAGCAGGGCGGCAGCA
ATGCACTTGCTGGAAAAGGGGAAAAATTGGACAATGTCCTCCGTAATGTAATCTAGCAAT
GGTATACATAATCGAAAGTACACATAACCGTTTCCACCCTTCACCTTGCTCTTCTGGCCA
TCCCACTTCTCCTTCAGGAAGGAGGCTAGCTTCTGTGTGGAGCACCCCAGCAGTTCATCC
CCTTTGCCTTTAGAGAGATCAAACGTCTCCACCAGCTTATCGGATTCACCCACCGTTGTA
GAGCAGTACCGCAGCTCCAGTGAGAAGGGTGAGCCCTTGGGAAAGCACGCACTCACCACT
AAAAACAGGCAATGCGACTTGTGGTCTTCTCCCCCGTTGGCGCGCCGAATAGACTCCTTC
TTTAACGCGTTTCCCAGCGCGAAGGCGTCGGACACATCATTGACGGCGCCCAGGTAGAGG
CTGGGGACGATTTCGTTGGGTCGGAACGGTTTAGAAATGCGCACCGGTAACGCTCCGGGG
AGGTGCAAGCCCTCTGTCACCTCTTCAAAGAGGGTACGAAAGGTAGGAGAGGCGTTTCTC
CACTCCACCAGAAAGGCCTTTAGGAGATTCACAGCGTCCATCGGAACTGTTAAAAAAAGA
AAAAAAGGAGAAATGGAATGTAAAGGTAATTCCACATATCCTCGCCTTGGTGTGAACCGG
TGGTTGCCGATCACTGGGAGAGCGCGCAAAAACACACTTTTTTTTTTTTTTAATTCAACT
CGCGTTTAAAAACAACAACAAAAAAGTAAATTTTTACCAGATTGTTTTTTTCAATATATT
TTTTTTTTTTTTCTACGTGGTTTACCAATATTTTTTTTAGTTTTCCTTTTTCTTTGGACA
ATATGTTAAAAATTAAAAAAAAAAAAAATGAAAAGTTTAAAGAGGTACATTCGTTTACAT
TCGGGTACAAGTATTTTTACTATCTACGAAATATTCTATCTAGTCGTGTTGATATTAAAT
GTAAAGATGCCACCACTAACACGTGTTTAACAGGTGTTCGTCAATATAAAATGGTAAACT
AAATTAGGAACAACATACACAAAAACACGGGGAAAAAAAGACAGGGTAAGTGAAACAAAA
AAAAAAAAAAATGCAAGCAACAAAAACAGAGTTTTTTCTTTCGGAGTTCACTATAAAGAT
CTGTCTTATGGGACTTAGGCGCAGAAGGACAGGACGAAGATGATCAAGTACCCTCCGGCG
GCGGCGCACATAAGGCCGAATGCCTCTACAATGTCCAAATCCTGATCCTTAAGCTTGTTG
TACATCGGCATATCCTTGCAGGCATCCTGGGTGTAGCTGGAGGCGATCATACCAACGTCG
GCGGTGAAGCAGGCGAAGGAGAGGAAGGTCAGGATAACCAGCATGAGGGCCATGCAGCAG
CTGCGGCGCACAAACAGGTAGCCAAAGGAGACGAAGGTGGCGAGCCCACCGAGGCCGGTA
CCGGCCACCGCGAGGGCAGCAGAGGCGGTGTAGAAGTCCTTCGCCTTTTTGCACTCAATC
TGTTTATTGTTAATGCGTTCCACACTGTCAAGGGTCTTCGTGTGCGTAATCACCTCCCGG
TACCAGAAGAAGACCTGATACTTTACGTCGTTTTCCTCCTTGCGGAACAAGGGAAACAAC
AGGGAGCACGTCCCAGCTGCCGTGAAGATCACAAGCAGGAGGAAGACAATAACGCGTACG
CAGTAAGCCATCTTGAAGATATGGGAGCAAAGAAAAAACGATTGCTGAAACCTACAGACA
AAAAAAAAAAAAAAAAAAGAGAGAGGAGACACACGCAGTTAAAAGCAACAGTACGAATCA
CAGAGCAGGGGAAATATTCATCTACACTATAATCGAGTTTCCACCTCTTGGCGGTCCAGC
TTCTACAATGAAAATAAGGAATACAACAAAAACATCAAAATAACTTTTAACGCTTTTTTT
CTTTTGGCAAATTGGGCGTATATAGACTTTGAAAAATAAAATTATACCAAAAACCATAAA
AATAGAAAAACTGGTATGCAAGTCCTTTATTTATATGTTTTTTTTTTTTTTTTAAACTTT
AGTAGTCCTTTTTCACAAAAAAAAAAAAAAGAAGGATGTCATCATTATTTAATCCTTCTA
CATTAGCGTCATCTACTGTTAAATGAAAACAGGCCTCCGGTACGGATTTCTGTCAAAAAT
ATCTACGGGGAAGTGGAAAAGGGATATATAAAAAAACAAATCAAAACAAAAAAAAAAAAA
AGGTATACTTTACGCGCAGAAGGACAGGACGAAGATGATCAAGTACCCTCCGGCGGCGGC
GCACATAAGGCCGAATGCCTCTACAATGTCCAAATCCTGATCCTTAAGCTTGTTGTACAT
CGGCATATCCTTGCAGGCATCCTGGGTGTAGCTGGAGGCGATCATACCAACGTCGGCGGT
GAAGCAGGCGAAGGAGAGGAAGGTCAGGATAACCAGCATGAGGGCCATGCAGCAGCTGCG
GCGCACAAACAGGTAGCCAAAGGAGACGAAGGTGGCGAGCCCACCGAGGCCGGTACCGGC
CACCGCGAGGGCAGCAGAGGCGGTGTAGAAGTCCTTCGCCTTCTTGCACTCAATCTGATT
ATTGTTAATGCGTTCCACAGAGTCAAGGGTCTTCGTGTGCGTAATCATTTCCCGGTGCCA
GAAGAAGACCTGATACTTCACTTCGTTTTCCTCCTTTCGGAACAAGGGAAACAACAGGGA
GCACGTACCAGCTGCCGTGAAGATCACAAGCAGGAGGAAGACAATAACGCGTACGCAGTA
AGCCATCTTGAGAATACGGGGGAAAGTTTTTTTCTTTGTAGGGCAAAAACCTTAGGGAAA
ACAGGACAAAGCGGGAGGGAGCGTAGTGTATGGAAGGAAATGAACTTAGAAGTAGACACA
CATCAAGAGCGACTTCAAAAGTAAGAACAAAGAAAAAAAAAAAAAAAATACAGTAGGGTC
AAGTAGTTCGTGTCAAACAGACGCCCTCTCAATTAAGAAAACAGTTTTCTCACTTTTCGC
GTATTGCTAACGGTCGGAGGTGCTTTCTTCACCACGGGTTTGGTGGAAGCCTCACCAGTC
GTCTCCTCGTCTTCCGCTTCACGGACGCGTTTACCTCCCGAGGACGGCGTCTCGGCAGGC
TGTGGTGTCGATTGAAAGTCTGCGGAAATAAAATCATTCGCCTCGCCGTTGACGAAACGG
ATCAGATTTTGCTCGAAGGAGGCGAAACACCGCAGGGGCTGTGGTAGGGATACGGTGCGC
AGCAGGTTCGCCGCCACACTGCGCTGACTTTGAAGCCAACCACTATGTGTGGTGGCGGAA
GCGCTAATGTTTTCTTTGTAGCTTTGAGAAAGGTGTTCCGCCACACTTTCTGGTGTTTTG
CCCGACTCCTGGCACACGTGCAGAAATGCCTCTGCCAGCGCCAACCGCTGCGCACAGAGT
GGTTTGACGACGGCCTGACTGAACAATGTTCTCCACTCCTTCGCGTTGCTTTCCAGTAGC
TTGCAGACCGCCGGGATTTCCAACCCAATACTGTAGTCGCGCAGCACCTCTAGAGGAAGC
CGGAGGGTCACCTCCAGTTTGTCCACCGGCGCCACCCACTCCTCTTCTTCGCGGAAGGAC
CCTAAGCTGGATGCGTCCTGCACCTGAAGAGAAATAAAACTATTCTTGTCCTCCCCCGGA
GAACGGTGAAGGCATTCCTCAATGCCAAGTAGCACGGCGGTGAGCTGCAGATCCACGGAT
GGAAAGTGTTTCACTAAAAACGCCGATAACTCCTCTGTGGAAAGCACACAGAGCCAAAGC
GTGTCCATCCCATTGTACACCAGTACTCCTATCCCGCCCTCGAGGTGGGTCACCACCTTC
ACAAACACACAGTGCGCCTGCTCCGCGGAGCCTGCCGTCATCTGCTCGTTTCCCACCACA
ATATCCTGCCAAGGGGCGTATTGGAACAATCGGTGGATCACCTTCGAGCTCATTCGCTTT
AAATGTTGAATGTATTGCTGCAAAAAAGGAAGCACTTGATGAAGACGACAAACAGGGAAG
CAGGTAGTGTAAATTACTGGCGTAAAAGAGCCGTTGTGGGCACATCGATTGGTCTATTTA
GTGGTTATAAAAGAAGTATTCCATCGTCGCTTTAGCCTCCAATGGCCCGTCGCAGTCTAT
CCCCCATCTTTCCTTTTTGTTGATACTCCGTTAGTGGAAACTGATTCTCTACTAGGCGGT
TGGCGTGTGAGATATCCCGTACGAGCTGTCCGTTCTGCAAGATGGCACGCAGACGGTCGG
CAAGACCATACCGTAGCTGTGTGATGTCGTCCTCGTCTGTCGTAGTATCGTGATGGGGCT
TCCTGGGAAGGGAGAAGTGAATAATCGACGAGATGGAGCGAAGCTCACGAAAATAGCCGG
ACTCGCGACCACCGTGTAGCTGAAAGTCCGTGACGACCAGCACATTTGTTTCGTCGTTGA
TGAACTCCCCCGCCGACGCGCACACCCGCACAGTAGTTTCCTCCAGAGAGCTGGCTAGGT
TTTGCAGCACTGCTTCCTGCTCTTTTTTAGAGGACACCACTACGACGACTTTTAACGGAG
AAGCGGTACCGTCGGTCGCACTAGACGCGTGGGCAGCTTTATTCAAAATCATCGAAGCCA
CCTGCACCGTCTTCTCCGCAGCGATACGCTCGTAGTCGGAGGGCGCCGCTTGCGTATGTT
CCACAGGGAACGGCACAATTTTACTCTCACACAGGGACCAAACGGTTTGGTCTTCCTGTA
CCCAGAACGCCACACGCTTGCTGTCGTGGCGGAACAGGTCGGCGCTCACCAGTCGATAGG
TTTCCATAAAGAGCCGGTCGCATGTAAAGATAAACTGACAATTAACGTCCACCACCCCAA
TGAGGGACTGCCACAGCAGACTATTAAAGGCCTCGTTTAACGGGGGCAGGGTGAACCGTT
CCATGTTGAAAAATACACAAGCCTGAATGTGCTCCAATGGGAGGGATGAAACATGCTCCG
TATTCTGCAGCAACTGCTGTAGGGCCTGCCCGGTCGCACAAAGGATAGGGTACCCGGCCG
CTGGCTCCTCCCTTTGGCGCTTCCGGGGCTCCCTGGCCCTGTCGTCCTCATACGGCACAA
ACTCTCCACCATCCACGTAGTGGAAAGAAAAGGTGGTAAACCCAAACATGTAACCCATCG
AGCGCACCGTCTGCTTGATGTCCCTAAAGTCCGACACCACAAGTAGGGCTTTAAACTCAT
CGCTACTATTTTCAGTTCGTCGACATTGTTCCAGAACCCGTATCCCCGCTGTGATCTGCG
CAGCGGTCTTCTTTCCGCATCCCGACGGACCGCACAGGAGACCGTGAAATCCGCTGAGAA
GGTAACTGAACGATGTCTGTTGAAGGGACTTGAGCAACGTACCCGCTACCCGCTGCGTCG
GAAACACTAATGCCTTCAACTCGTCGAGGTTGGGAAGGTTTCCCTGGTCCCGCCCCCGGT
TGCCACTAGTCTCGAAGGAGCGGCGCACACCACGCTCGACGTCTGGCGGCAGTCCCAAGT
CTTCTACGGTTAACACGACGGGATGACTAGCGGAGCACTTTCCCCGTATCCCACACAGTT
GATAAAACGCATCCCTGAAGTCGTTCGACCCACAAAACTCGCTCACAAACTGGCATGGGA
CCCAGGAGGAAAATTTCACCAACGTGTCCCCCACGTCGGATGTGTCGTCGTTCACCGTCT
CCTCACGGCTGACCACTTGACGCTGAGGAACCAGCCCTAGCTTCCCACCAGCCTCCACCA
CCAGCTGCAGAAGTGATTTTTCCTCCTTCTTTGGTGGGTTGGTACTAATATTATCCTGTG
AGGAGTGCACAAACGTTGGAAAGATGACTTCCATTTCTAAAACTAAAGGAGGTGCATAAC
GTAGAGAGAGTGTGTGTGTTCTGTGAGAAGATATGCAAGTGCAGAAAGATAGCCATACTG
GGGCATAAACACTTTCTTTTATTGTTTTGTTTTGTTTTCGGTTATTTTGTCTCCAACGAG
AATAAGTATTTAAGAACATAGCTAATAAAATAAATAAATAATTGACCTACACTACTACGT
TTTTTTTTTTTTTTTTAATATGGTTACTTTCTAATATATGTGTAATAATGAATGAGGGGT
GACCCACCACACATTGCTTTTATTTCGATGGCACCTCAAAAAAGAAGGGAAAAGGAAGCC
TTACTCCGGGGAGCGCTGGAGGTTGGGGTGCGTCTCGTAAGAGTGAAGAAGGACGCCATC
GTCCAGAGGCGTCTGATGGCGGGTGCTAATAAGTTTAAGGGTTTCGGCACTCACGTCCTC
CAGAGACCCCTTATTCAGGCTTACCTCACCACGCTCGGGGTACTCGATCACTTCAAATAA
GAGCGCCGAGTCGTCGAACGGGCCATCGTTGAAGAGGATGCAGCGCATGATTTTCATCGT
GGTGTCGTTGTACTTGACACCAACGGTGTTCATGTCCTCGAGTATCTTCACACCCATCGC
ATGCGCGGAAGGGTTCTTCTCCCCGGCGATGCGGAGAATGTTGACCATATCGTTGCAGAC
CTCCGTCGAGAGGGTATCCTTCACGGCTGCCGCAATGAAGTCGGTGCACTTCTTCATCGC
CGCCTCCACCTTCACCTTCTCGGCCTTCTGCTCATCTAGAAAGTCCTGCTTGAACGCGGA
GAGGCCTCGCTTTAGCACATCCTTAATGTGAAAGTTGGACAGCTCGTGTTGCTTGTACTC
GCGGTGCATCTTGCGGATGGGGTACATGGCCTCCTCGTAAAATGTGACGAGCTCCTTAAT
CGACTTCCACTCCGTCTCCGACAGCTTCTTCAGCGCACCGGCCACGGGAGCGCTCTTTGA
CGCATCACCCTCGAACCGCTTCTCTACTTCCAACTCAATACGGCGAAGGTTGGCAGTCTC
CTTCACGGCGTCGCTGATAAGAGGAGCAAAACGCGCGCGCGCCAAGTCCACCTGCGTGAA
GCCAATCGTCTGCGCGTTCTCGGCCTTATCAAGGATCGCCACCGGTACTCCGTGTGCCTT
GGCGACGTCCTCGCGTGTGGCGGGAACGCCCAGCTTGGTGGGGGTCTTTGCCGGTGCCAC
GTTTTGCACCACCGCGACACTGGAAACTAGACGGACCAGAGCGGGAACGCTACGGTTGGA
AACACGGCGCATGGTATGACTTTTTTTAGTAAACGATATATATATAAAAAAAAGTGGGAA
AAAACTGAGAAGAAGAAAAAAAAGGGAAGAGAATACGGGTAATGAATCAGTGAAACGACC
CCATGATAACGTCTCCAAGCAGGGGAAAACAAAAAGTACGGAACACTATCATTGCTTCAT
TAACGCGTTTTCGTATATTGTTATTAGTTATCAATGACTTTCAGTTTGCCGCGGAACTCA
TCGAGGGTGGTGTACCCTTTACGGCTCATCACCTCCTTCAGCTCCCCAATCAGACGGGCG
AAAATACCCTCTCCCTCCGAGTGGAGGGCAGTGCCCACCTGCACCATGGACGCACCAGCG
AGAATATGAGCGAACGCATCCTCCCCCTTGGAAACACCGCCGCAGCCAAAGACTAATTTT
GATGGACAGCGGGTAAAGAACGCATTCACGTTGGCCAGTGCCGTTGGCAAGACGTACTCT
CCACCGAGACCGCCAAACCCATTCTTTGGCTTGATCACCACCGATTCCGTCTCAACGTCG
ACGACGAGTGCGTTACCAACGCTGTTGATGCAGGTAATAAAGTGCACCAGCTCAAAATCA
TTAAGGACAGCCGCGGCGCTATCAAAGTGCGCCATGTCAAAATACGGCGGCATCTTCACA
CCGAAAGGACGCTGGTAGGCGTCCGAGACGGCCTGGAGGTACTTGCGCATGTCGTCAAAG
TCATACGCGATTTGCGGTTTGCCGGGCACGTTGGGGCAGGAAAGGTTCAACTCCAGTATC
ACACTCTTTTCCGCCGCAATCTCCTTCAGTTTGGAGCACATTTCCACATTTTGCTCCACC
GAGAGACCGGACATGGAGAAGAAGAGGGGCTTTTTCGAGTAGTCGTGGGTCGAGGTCACG
TAGTCGAGGTAAAAGTCAAACCCAAGATTCGGCAGTCCCATCGAGTTGATGCTGCCCAGC
GGGAGCATCTTGTACCGCGGCTCCGGGTTACCCTCCCGTAGAGCGGGAGTGCAACTCTTG
GTGATGAGGGAACCACTGGCGGATGCCGTCAACTTTTGCAAATCCTCCGTCGAGGTGCAC
ATGACGCCGGCGGCGTTCATGAAAGGGTTCTCGAACCGCTGGTTCAGAATGTTCACCTCG
AGGCTCATTAGGAGAGAAAGGCGTGACAGGTGCTTTAAAAAATTCGTTTGTTACGTAGGT
GTGCGGGAGCGCTGTGACACAGAAAGAAAGGAACGCATCAAAACAGAACAGAGGGAGAGT
GGTGTAGAATGGGCCGTGGACTTCCCCTATCACACACGAGACACAGTATGCCAAAACGGT
GGCAAAAAAATAATGCACGACACAAATTAGAGAAACCTTTTGAGTGGCCAAGCGTTACGA
TAGGTCATTGTAATTTAAAAACAAAAAAACACATTATTTATGATTGTATTTCTATCTTTT
TTTTTTTTTTTAGTTAGGAGAGAACGCTCAACAGAATGGCCATTCGCATAAAGAGGCCGT
AACGCATCTGACGAAAGTAAGCAGCGCGCGGGTCGTTATCCACATCGCTGGAGAGCTCGT
CCACCCTTGGGAGGGGGTGCATCACAATCATCTTCTCCTTCGCATCCTTTAACCGTTCCT
TGTTGATGACAATATCCTTCAGCGCCTTGTTGAACGTTGCGATCGGGTCAGAACCGTCGG
TGGTGGTGAAGCGCTCCTTTTGCAGCCGTGTGGCATAGAGGACATCGCTGTCTGACACAA
TTTCCGCCGACAACGCCGAGACGCAGACGAGTTCCGTATTTTTGGACTTCAAGTCTTCCG
CAATGTAGTCTAGCACCTCCTGTGGCATGTGCAGTTCACCCGGGGCAACGAGGTACACCT
TGCGCAGGCTGAAATTGTGCACTAGTAACTTGAGCAGCGAGTGAACCGTCCGTCCCATTT
TGAGGTCCCCAATCAGGGCGATCGTTTTCCCGTCAATACCACCCAACTCCGCGTGGATGG
TCAGCGCATCGAGCAGCGCCTGCGTGGGGTGTTCCCCGGACCCGTTACCCGCATTCATGA
TGGGCGCCTCCGATACCGCGGTGGCCTGGCCCAGCGCCTCCACCTTTGGGTGACGGAGCA
CCAGCACATCGCTGTAGGACGCCAATGTCCGTACGGTGTCCTCCAGCGTCTCTCCCTTGT
TGATAGAGGACGTTTCAGTTTTGAAATTGACGACTTGGCCACCAAGACGCAACATGGCGG
CGCAGAAGCTCGATAGGGTTCGGGAAGAGTCTTCAAAGAAGAGTGGAGTCATGACACGGC
CGTGTAGCGCGTCAATGGTGCCTCCACTCTCAATGTGAGACTTGATGGAAAGCGCCAGTT
GAATCAACTGGTCGATATCCTGACGCGAAAACTGTGACGCGCTGGTCACCGACTTCCCCT
TGAGGGTACCAACGGGTGAAAGAGACATTACACAGAGATAGGCGGAACTGGGGAACGGCA
GAAAAAAAAGAAAGAAGGAAGGGAAAAGGGGGGATGCGGAACAAGGCAACATCAATATAT
AGCTTATCGTGACCACACAATAATCACTAAAATGCGCACACTACTATTTTCCCAGTTCCC
CTCCCTTTTTTTTTTTTTTTCACTATTATGTCTTATTCGAATTATTTACCGTATCTCTTT
TGTTATTTTTATTTTTGGCTTATTTTATTTTTATGTATCGTTCAAAAAAATTTAAACACT
TAAAGTTCATCACTCGAGCGACTTGTTTCTATTCGTGTGAGACTGGGCAAGTGAAATTAG
AAAAACAACGCTACCAACTGCTGTCGCTGGTGGACTTACAACTTGCTGTTGGTGCTGGGG
TTCCACTGAGAAAGGAATCCACGAATCTCCTTCTCCTGTTCTTCGCTAATCGTATTCGAC
CGTCTCCATAGAGGGAGGAGCTGGTAGAGCCCCACCACCGCCTCGAAGGGGTATCCCATA
TTGTTGAAGAACTTCTTGGCGCCCATTTCACGGTCGACCAACACCACAATGGCGACCACC
TCCAGACCGGCCGCCTTCATCTTTTCGATCGCCTCCACCTTGGTCTCGCCAGTGGACACC
AAGTCGTCAATAATGACGACGCGCTCCCCCTTCTTGTACTCGCCCTCAATGGCGGCCTTC
GTGCCGTACAGCTTGGTTTCACGGCGAGGATAGATGAGAGGGATGTTCATCTCGAGGGAG
ATGGCGGACGCGATGGGAAGCGCGGCGTACGGTAGGCCCACCAGACGGTCAAAGGAGTAG
TGGCGCAATATCTGCGCGTACTCCCGCGCCACCAGTCGCATGATGGTGGGGTAGGTGACG
AGTCGGCGAAGGTCAATGTAAATGGGGGAGGTCTTGCCAGACTTTAGGGTGAACTTACCC
AAGCGAACACAGTGCGAGGCGACGAGGGCGGAGGCCAAGTCCGCAGAGGGGCCACGGGCA
CGGCGAATGAGGTTGATATCTTCGCACAACTTCTGGGCGGCCGCGCGGGGGTCCGACGCC
GCGGCGATGCTTCGAGACACGTTAATCAAAAGTCCGCTACCGTCGGCGCGCAGACCAGCG
CGTAGGGCGTCCTTCAGGCTGCCTCCCTGAGCCCCAATGCCCGGGACCAGGAACCACAGC
GTCGGGGCACGAGCACGGACGCGAGCCAGCGCAACTGGGTCGGTGGCACCCACTACAAGG
CCCACATTCTGGTTTCCGTTCCAGCTGGATTCCGCGCGCTCAGCAATCTCCTCGTACAGG
TACTTTCCCTTGACACGGAGGCACTGCAGGTCGTTGCTGCCCTTGTTGGACGTCTTGCAA
AGGATAAAAACACCACGGTCGGCAAACTTTAGAAAGGACGAGAGGGAGTCGCCACCCATG
TACGGGGAGGCGGTGATGGCGTGCGCCTTCAGGTGCTCAAAGGCGGAGGTCGCATAGGCG
TCCGCGGTCGCGGCAATATCGCCACGCTTGGCGTCCAAAATAACGGGGATTTCCTTGGGA
ATGTACTCGATCACCTCGGTCAGGACAGCCCAGCCCTTGTCGCCGAACAGCTCAAAGAAC
GCCGCGTTGGGCTTGTAGGCGGCGGCGTAGTCCTTTGTTTCGTCAATGAGCTTTTTGCAC
TCTACCAGAGCGCTCTCCGCAGACTTGGCGCGGGGGTCCAAACCGACGCACAGCAACGTG
TGAGCTGCTCTCTTGTTCAGCAGCTGGAAGAAGTTTTCCGCCATTCTTCTTTTTATTTTG
TGGTATGATAATAGAAAAGACTTTTCATAAAAATGAGAGGGGAAAAGAGGGACATGTAAG
GAGTACACTGTGCTGTTCGTGTTACAACCTATACCGATAAAGTAGTCATGCGCCACGTCA
CTCTATAATTTTTTTGTGTATTGCTACTTAAGTGATTCGTTAACCGCATCCATTAAACCG
CTTTGCCGAGTAACTTCCAGCCATTGTAGGGGGACCACTTGCACTTGGAGTGGAGTTCCT
GTTCTACCACTTCCCACTCCCGCGAAAGGTCAAACTGACGACTCTTGAGGCCGTCTACCC
GTAGCCCGAAGATTTTCACTGGGTTGGTGTGCATCAGCTCTGCTATACGGTTTAACGTCA
GTTTCTTCGCCGCGTCCTTTAGCGCCGCAGGGCACGGGGCGGTGGGGTGCGGCCAACGGC
CCGCCACCACGGACAGCAGAAGCGGCACCACCACCTCAATCGCGGGCATACCGCTCGGTG
GGTTCTCCTTGTTGTCCTTCTCGGACAGCAAGTGAGGGTGCGTGGTCGGTTCCGATGCAG
TCGACCGTGCCGTCCAGCACACCGGCCCAAAGTGCCTCGTGGTGCTTCTTGGGGCGGACA
GGGGGGTTCACCTTCACCCTCGCCCCACAGCAGGTGTAGTCCTCGGTGGTGAGGAACAAG
TGGTGTGGGGCCACCTCACACGTGAGGTGAAAGTTCGGGTGCTGGCGACGCGTCTCACGG
ACAATGTTCAACCCTCCCTCCGTGGAAAGATGCGCAATGTGCAGCGGGGTGTTGTACTTG
AGGCCCATTTCCACCGCCTCCGCAATGGAGGACACCTCCGACTCCGCCGGTCGGCGCACG
GAGTGGGTGGAAACATCCGTGTATGGGGTTTCCTCGGACGCCTTGTTGTTGATGTCCGAC
TGCTCACAATGGGCCACCAGTGGAATACGGAGGCGGCCGCACAGTTCAAAGGCAGACTCC
GTGACACTTTTGCTGGACTTGAGGTCGCCGGTAGAGTTGTCCAGGTACAACTTTAGCCCG
GAGCAGTGCGACTTGAGTGCGGCGTGTTGTGGGTCGCACCACAACTGCTCCAGTTCCTTC
AGATGCTCGTCCTTGGTGGCACCAAAGAAAAAGTACAAGAGACACTTATCGCTGCATCTT
TTGGACCGTTCCACTTTATCGGCAAAGGTGGCGACGGTTTGTGTGGGGGGATTCGTATTG
GGCATGTCACAGACCGCCCCAATGCCACCAAAGAAGGCTGCCTCGCTTTCAGACACCATA
TCCGCCTTCGCCTCGAGCCCGGGCTCCCTAAAGTGTACGTGACAGTCCACTAGAGGGGGG
AAGGTGGTAATATTGCCTGCTTGGGATACCGTAGAAGTCGACATGTAAGATTGGTAGTTG
TTCTCTTTTTCAAAAAAAAAAAAAAAAAGAAGGGGTGAAAAAGATGGGGATGAGCACAGT
CGTCACAAAAGCACCACTGTCACCGTTATTCTCGTAAGCAGGGAAACACCAAAAGCAACA
CCATACAGAATTTGAATGTTTAAGTTTGAGTGCTATTAGTTAATTAGTATTAGTTAAAAA
AAAAAAAAAAGGATTAGAAGGCATGTCCTACTTCTTTATTTGAAATTATTTCAATTTTAT
CGGTATTTTTTTTTTTTTTTTATGTCCACTATGTTTTATCCTTGTGTGAACAAAGGCGTC
AGCGACTGCTGTTTTGCCTGAAGTCTCGAAGTAATTCTATAGTCACTTCTATGCAACAAA
ATGTTTTGTCTGTTATTTAACAAAAATATCCCTTTTTATTTTCCAAGTTTGTTTGCTTTT
TCGCCCATGTACTGCGCCGTTACCACTGGAAGTCGCTGAAGGAACCGTTACCAGGCTGGA
ACACCTCCTCCAATTCGTCTTCGCTGACCAGTCCATTATTGCGGGTGACGAGTGGGTTGA
CCACCTGGGACAGTTTCAGGTAAATGATATCTCCCTGGTGCAACTCTAGCTCCACCACAC
CGGATACCTCCGAGCAGAGGTAGCGAATCGCCTCCACCGCGGACTGCGTGTGCTTCTCGG
AGAACTCATTGTTCACCAAGTGCTGCGAGACGTGGCGGGAGTAGGTGCGGAACAAGTCTC
CCATCGGGCGGTCGAAGCACACGTCCATGAGGAACTTGAGACCGGTGGCGAGGAGCGCCA
TACCGGGTGCTTCGTACATGGCACCGTCGCGGGTTCTCGAAATGCCAACGCCGTTGCGGC
CGGCAATCTCGTTCGCCATCTGTAACGCCAGAAGAGGGGTCACGTCGGTTCCGTTAATGT
TCACGCAGCGGGCGGCGCGGAAGGTGAGGGAGACAAACTCCGGCTTGTCGGAGCAATCCC
GCAGGGGCTTCACGAGCGTCGGGGCGGGCAAGTTTCGCACGTCGTCGGTGTAGTAGGTGT
TACCGCAGACGGAGCTGTGGACGAGCCCGCCGGACTTCACGGTGGCCTTGATGCCACGCT
CTCTCAAAAAGGTGATTTGGTCCGCCTCGCTGGTAAAGTCCTCCATCAGACGAGAGTCCC
TCCATGCATTGTACACGCCCATCTTGGGTTCGTACATTTGGACGTACTTTTCAAACCCGG
CTTCCTTCTTGTTACGCTTGGAACTCTGTGCCACAACGGTCATCTGGCGCTCCCGCATGA
CGTGGAGAAGGTGCTTGCCAAAAATGTGCCAGCTCAGGTAGGACAAGTGCCAGTTCTTGT
TTTCGTCCATCGACTGGCACATAATGAGGTCAAACGCCGCCTCCGCAATCTCGGAACGGA
GGTCCACCACCTCTGTCGGGACATTAATGTCTCTGAAGGCCGCCTCAAAGTGATCAATGT
TCATGCCTCCGAGATAGGCGTGGAAGCACGTGACATTGAGACCCTCCTCGTGCAGACGGA
GCGCCAGCACCTTACTGTCGTTGTTGTTGGTAATCATGAGGCCAACATTGTGGCGACGCA
GCATGGCACAGTTATTGTTCTCAATCTTGTGGTAAATCTTGGGGACATAGTGGCGGAAAG
GTTCAATTTCCATCTCAATCGGCATTTCGAGGCACTCGCAGAACATCTTGACAATGTTGG
GCTCTGTCAAGAGGGGAATGTTGTAGTCCACCGCCAGTCGTCTCACCCAGTAGTCGGGGG
TGGCGGTTTCCTGCGTGCAGCGCTTCAGTAAAAAGTCCTTCTTCTTGTCGCGAAGTTGAA
TCACGAGGTCAAACTTCACCTTGCTGCACACCTCCTTTTCGTACTCGGACAATTCGGTGC
CCTCCACTTCCCCCTTAATCGACAGCACGGTGCTGTCAATGCCGAACTCCTTCAAGCAGC
CCGCCGTGTGCTTGTCCGCAAACAGAGGCAGCTTCTTGGCGAGCCGTGCCACGAACGGGG
ACAGCTTCTCGTAGTACGTATCCATGTCGCAGGAGATGAAGACACCCTGGGTGGGGAACT
TGAAGTTTTGGCAAATCATTGCCTTCTTGAACACCTCATGCTTGTCGCGGCCAAAGACAC
CAATTTCACCGGTGGAGGCCATTTCCACACCGAGAATGGGGTCGGCGCCGGCGAGTCGGT
TGAAACTAAACATGGAGGCCTTGCAGCCAATGTGGGTCATCTTGGCGCGCTTGATCGGGA
CGAGATTGTGCTCGCGGCGCGACAGGAAGGCGGATACCATCACGGCTGGGAAGGAAATGC
CGAGCGTCTTGGACACGAACGGCACGGAGCGGGAGCTTCTCACGTTAGCTTCAATGACAC
GCAGCTGACCAGAGGCGGTCAAAAGGAACTGAATGTTCATGGGGCCCACGACCTCCAACT
TCTCCGCAATGAGGGAGACGGATTCGTAAATCTTCTTCATCACCTCCTTGCTGGTGTTCT
GAGGGGGGAGGAACATGGTCGCGTCACCAGAGTGCACACCGGCGTTCTCCACGTGCTCGC
AAATAGCGTAGCACAGCACTCGGCCGTAGTGGGCGACGATATCCACGTCGTACTCCATGG
CCCCTTCAAAGTACTTGCTGACCACGACCGGATGTTCACCAGACACCAAGGAGGCCTCTT
CCAGGTAGCGCTTCACGTCCTGCTCGTTGGCAATCACCGCCATAGCAGACCCACTCAGCA
CGTAGCTCGGTCGGACGAGCGTCGGATAGCCAACCTTACCGCAGAATTCGAGCACTTGCT
CCAGCGACGTGGCCGACACCCATTCCGGCTGCGGCACATCGAGGTCGTCGCACATCTTGG
AAAACTTGTTACGGTCCTCAGCCTTATCAATGTTCGAGGGGTCGGTACCAAGAATGGGTA
AGCCAGCGTTCTTTAGCTTGAGGGCCATGTTCTGCACGATTTGACCACCGAGAGAGATAA
TCACACCACGGCAACGTTCCTTTGTGAGAATGTCAATGACAGTTTCCTCCGACACCTCGT
CAAAGTAGAGGCGATCGCATTCGTCATAGTCGGTGGAGACGGTCTCGGGGTTGTAGTTGA
TCATAATCACCTTGTTACCCAACCGGCGGAGTTCCTTGGCGACGAGAACGCCGCCATAGT
CAAACTCCACACTGTTACCGATGCGGTAGACACCACAGCCGAGCACGGCGTACATTCTTT
CCGTGAAGGGGACATCGTCACGTTGGGCATTGTACGTGGTGTAGAGGTAGCAGCACTGCG
CCGCTGGGTACTCTCCGGCGAGGGTGTCGATCTGCTTCACCAGTGGCATCACGTCGAGCT
CCACACGACGGGCGCGAACCTCCGCCGCTGTGATACCGAGGTACTTGGCGATCTGAATAT
CGCAGAAACCGTGTGCCTTCAGGGCAAGAAGGGCCGCCTTGGGAATGGTGGGGAACTTGC
TACCGCTGTAGAGCTGGCTGGCCTCCTTCTTGAGGTTGTTCAACTTTTCAAGCTTGTACA
AAAAGAAGCGGTTAATCTTTGTAATGTCGTGTAACTCTTGTACGGTGTGTCCCTTCTCGA
AGGCGCGGCACAGGGCAAAGACGCGGTAGGGGGTGGGGTTGCGAATGTGTTCCATGTAGT
CCCAATCCTCGTTGTCAAACCGCTTTGGCACGTCGAAACCAGAGTAGGACGGGTCGACCA
TGCGCATGGATTTTTGGAATGCCTCCTCGAAGGTGCGGCCAATCGCCATCACCTCGCCGA
CACTCTTCATCATGGAGCCAATCTTCTCGCTGACCATGTTGAACTTGCTGGTATCCCAGC
GAGGGGCCTTGACGACAATGTAATCCAGACTGGGCTCAAAGCACGCCATGGTGTTCTTGG
TGACACCGTTGGTGATCTCGAACAGACCCTTTCCCAGCGCAACTTTGGTAGCGACGTGGG
CCAACGGGTAACCGGTCGCCTTGGAGGCGAGCGCGGAAGAGCGGGACAGACGTGCATTCA
CCTCAATGACGACGTACTGGTGGGAGTAGGGGTTCAGACCGTACTGAATGTTACACTCGC
CGACAATACCCAAGTGACGGATAATCTTGATCGACGCACTGCGCAGCATGTGGTACTCGT
CGTTACTCAGGGTCTGGGAAGGGGCCACCACGATGGATTCGCCGGTATGAATACCCATTG
GGTCGAAGTTCTCCATGTTGCACACGGTAATGCAGTTGTCGAAAATATCACGAACCACCT
CGTACTCAATTTCCTTCCAACCAGCGATACTCTGCTCCAGCAACACCTGCGGCGCAATGG
CAAGGGCTACTTCCACCTTGTGGCGTAGTTCCTCATCATTGTTCACAATACCACTTCCTT
GGCCGCCAAGGCAAAAGGCCGCCCGCACCATCATGGGGTATCCAATGCTGGCTGCCGCCT
CCATCGCCTCCTCCACGGAAACCACCGCGGCAGACTTGGCCACGTGCTCGTTAATTTGGA
GCAGGGTGTCTCGGAACAGCTCACGGTCCTCCGTGACGGCGATCACGGACACCGGGGTGC
CCAGCACCTGTACATTGTACTTGCGCAGGATATCAAGGCGGTCCAGCTCCAAGCCGCAGT
TAAGAGCGGTCTGTCCACCCCAGCCCAGCATAATACCGTCCGGCCTCTCCTTCTCAATGA
CCTTCTCCACCGCCTCTACCGTCAGTGGCACAAAGTAAATGTGGTCCGCCATCTCGTCGT
CGGTTTGGACGGTGGCAATGTTGGGGTTGATCAAGATGGTTTCAATCCCTTCCTCGCGTA
GCGACTTGAGGCACTGGGAGCCGCTGTAGTCGAACTCACCGGCCTGCGCAATCACAATAC
CACCGGCGCCGAGCACCAAGACCTTTCGTGGCTTGAACTTCAACAACTCGTTCGTCTTGG
ACTTCTTTACCCGCTTGATGTACTCCTCAAACAGGTACTCCGTATCCTGCGGACCGCAGC
GGCCCTCAGGGTGGAACTGAACACTGCAGAACGGCTTTGTCTTGTGCCACAGGCCCTCGT
TGGTTCCGTCGTTCGAGTTCGTAAAGTACTGCGCCCACTCGTCCTTCGGCATGGAGTTAA
AGTCCACCGCGAAACCGTGGTTTTGGGTTGTGATGACCACTCGGTCGTCCAAGAGACACT
TGCAAGGCTGGTTTTGCCCTCTGTGTCCGTACTTCATCTTGAAGGTCTGCCCGCCGGCCG
CCAAGGCGAGCATTTGGTTACCCATGCAGATACCAAAGATGGGCTTCTCCTGCTGCAGAG
CCCAGCGGACGCTGCGAATGGTGGCGGTGCAGAGTTGCGGGTTACCAGGGCCGTTGGTGA
TGAATAGACCGTCGTACGTCTCCGTCGTGATATCGTAGTCGTGGGGGACCACAATCAGCG
TCACGTCGTGCTTCAGGAGACAGCGGAGGGTGTTCAGTTTGACGCCCATATCCACCACGA
GAATCTTCAGCGAGCCGTGTCCATAGGTCACGCGGGTCTTGGTGCTCACCTCCGCCACCA
GATTGCGGGTGTTGGGATCGACGAAAGGGACATCGTTACCAGCGACGACCAACTTGCCGA
GCGCGGTACCCATTTCACGAAGCTTCAACACAATACTGCGGGTGTCCACCATCATCATGC
CAGGGATCTTATTGCGGGTCAGCCACGCCCCCAGCGTCTCGTACATTTCCCAGTGATCGG
GCTGGTCGCAGTACTCCTGCACCACCACACCGCTCACGTGTATCTTACCGCCCTGACTTT
CAAAGTACTTGATCATCCCAAAGAAGTCCTCCTCCAGCTCGGGAATACCGTAGTTACCCA
CCATGGGGGTGGTGAGCACCAGAATCTGGCCTTGAAAGGAGGGGTCTGTCAGACTCTCCG
GGTAGCCTACCATACCCGTCGCGAAGACGACCTCACCGGCGACACTCTCTTCATAACCAA
AGGAGTATCCTTCAAAATGCTCTCCGCCGTGCAGAATAAGCTCTGTCTTTACTCTGTTTT
TCAAAGACATTTTATGTATTAATATTTTTTTGTTTTATTTTGTATTATTATTTTTTCAAA
CTTTAAATAAAGAAATGACAAAAACAATTATATGAACGGAAAAAAAAAAAATCTTTTAAT
TTAGTTTTTTTTTTTAAGGTGTGTTTAATTAATTTTTTTTTTACCTTTTATTGATTTTTA
TTAAATTTTCACTTTTTCTCAAAATGACGAACTTTTGTAAAAGATGAACGAAAAAAAAAA
AAACAATTATACGGTTCGTGTATGCTGAAGAGATGTCTAGTTCTCTTTTTTTTCCTCTTT
CTATATATTTTATATGCCGATCAACTTAGCTTAAAATAAAGAAAAAACGTTTTTTAACTA
GAAGATAGAGAAAGAGTAGATAGAATCATCGCGTAAAATAAGGCGGCAAACAAAGGATAA
CGCACAACGAAAATGAGAGGCAAATACAGTTTACTTTGTGTGTGTAGCAGTACGCGTATT
TAGGTAGATTGTATTTGTAGAGCGATAGACGACAAGTCCTCTTCCACTGACATATTCTCC
CGCCCATTGGAAACCGTAAACACAAAGTTATTTCGCTGTTCCCCGACGGTGGTGGCATTA
TTATCCTGCACGGGGTGATAGAGGTAGTGGAAGTAGAGCACCTCAAAGTAGTACCAATAA
CGGAACTCACCGTAGCGCCACCACACGACAGGGTCTAATTCCTCTCCTGTCGCCAGGGCT
GCTCTGACGTATTCTCGGTCCTCCTCCTTCCACGCACACCACTCTAGCGCGGTCTCGTCT
TGTTGCCACGCGGTATGGAGCAATTCCCAAAAGCGAAGAAACAAGGCGTTCGGGTTCGAC
GAGGATGGGTCCCACCAGGGGGGAGCCACTTCCCCTTGGGAGTCAGCCAGGGCAAGGGTG
TCATTCGTGGAGAGTGTTGGAGGGTAGTACAGGTTGGGTGCCAGGAGGGTGGTGTTCACC
GTCCCCTCTCCAGCGGCTAGCAGATCTTGCCGCCGCTCCTCCTGCCGGCTCTCCCACAGC
GCCCCTATCCGCTGCTTGTACCGGTTCGTAGTGTCCGTCTCTTTGCGCTTCCGTCGGGGG
ACGCGGGAGAAGCGACGGAGGCAGGCGGTCTCCGCGTCACACTCAACGAATAAGACATGC
GAAAAGTAACGACAGCACGCCAAGTCGTAGAGGACGGAAATACCTTCACACACCACAAAA
TAAGTAGCGGGAGCAGCAGCAGTGGCACTCGGGTCGGATTGCGCCCCATCACCCTCGTGC
GCCAGGATACTGGCATCCGCTTCCAAATGGGCTTGGAGGGAATCGTCACTTCCACACCCG
TCGCAAGCCGTCACGTTGCCAGGAATAAGACCGTGCAGACGGACAGGAAGACCCTTATAC
CAGTCTGTGGCACTCGGGTCTTGGAAAAACAGCAGGAGAGCTTTTTCTACAAGCTGCAGG
GCCTCTAAGAATCCTCCCCAGTCAATGCACCTGGGGTCCTCGTACGTGCCCAGTTCGGTG
CACTTTTCGCCTATAAAAAAGAGGTCAGTGCTGATAGGATTGAGAACCACATGCGCGTTC
AGTTTTTGGTTCAAGCGGTGTGCGAGGGTGGACTTCCCTGAAGCGCTGCACCCAGACAGG
GCAACGAAGCGAATGCCAACCTCCGTCATTCCCAAGTTTAAATGATCTTTAAAACCTCTT
TTTCCTTTTTGTTTTTGTTAGAAGGGTCGAGAGGGAAAATGGATCAACTGCCATGGGAAG
GTGAATCATAGGGTTCGCCATCCTCTTGTACGGGTTCACGGGAATGACAGAGAAATTGGG
AAATATTCAGAAGAACTAAAATTTAACTTGACATCTAACAGGTTTTGAAATGAGTTATAG
TTGTGCTGGAAAAAAAAAAAAAAAGTCTTTCTACTGACTTTGTTTTGTTCCCTTGCTACT
CATAAATGTATTCTTTCATTTCATCGTAAAAATTCTTAGCAACCACAAGAGAACTTCAAA
AAACAGACGGAGAAACAATCACAAGAACGAAAGGGTTCACCCCCTTCACTTCCGCAATAA
ATAGCCCCAGTTTCTCTGTTCCTTGTGGCGCAATCGTTTTACAACAGGTAAAATCTATGG
AATTTCAAAAAGTACAAAAAAAGAATTCGTAATCATTCACATTCAAAACCGAAAAAAAAA
AAAAGGAAAACAAAAATTGCCCGAAGCTAAATGAAAGGAAGAACAGTTTCTATTGGTGGT
TCTAAACGAAATTCTATTGTATTGCCGGATCCGTGTGTGTGTGTGTGTGTGCATGTAGGG
TAGCATTCTAAAGAGAAAAATTCGGAAAATAGTCGACTAAATCAAGTCTGTGGCAAAGTC
ATCTAGAGCTCTACGGCACATGAGAAGGCGGTCCAGCTTGCTGTTGAACTCCTTCCGCAT
GCGGGCGCGCTCCTCCGGCTCGCTGACGGTGCTGATCACTTCCTCTGTTAAAAAGTCCAT
CAAGACGTTTCTCAAATTCCTGCACACCTCATAAACTAAATAAAAGTTAATTAATTTATG
CACCTGGTCGCCCAGCGTCAGTTTGCTGATCTCAAAGTACTTGAGAATGGAGTCCTTCAC
GATTTCAATGTTTCGTTCGTCCATCGTGCGACCGCCACGCTGGGCATTGAGGGACACGGA
CGGTGCGGTGGGGTCCGCCGGGGTAGGCTCGGACGCTGCGGCACGTCGCTCTTGGGGTTG
GTTCTCCTGCACACTCTTGTCGCCCTGGGCGGGTTGTTTCTGCGCCTGCTCGTACTGTTG
CTGCTGGGTAAACTGCTGGAAGTGCAGCTGCGCGTAGTACTGCTGCAACGGAGACTGCTG
CAGTGCCTGACGGGCCCCGGCCGGTCTGCTCCGGCCAAAGGACTGTCGCATGCCTTGCAC
AATGAGCCGCAGCTCGGGTAAGGTGCACTCCATTAGAGGATGGGAAATGTTAATAAAGCT
CTTTTCCCTCTCAAACAGGCTGTCAATGGCGCGGAGGCAGGCCTCCGTCTGCTGGTCGTA
GAACCGGTCCACTTCCTCCATCGTGCTGTGCTGCAACAGGGGGAAACGGAGGGACTCGAG
TGCCTTCATGGCCACATCCTTCAGTACACCCTTCACCTCTCGGACACAGTTGGCGGAGGG
GCGTTCCATTTCAATGAGGCACGTCGCACAGATTGGGCGAATCGCGGCATCACCGTGCAG
GTGGGGCTGGTACACACCCGAGGTACTGTGGTACGTCTCCCGGAGGAACTGATCCTCCAC
CTTGTCGCTCACCTCGAGGTCGGCCACCTCTGTCCAGTAGCGGTGGCGCACCACGGCGCC
AATCCTCGCACCAGCCTTGAGTCCCGGCGTGGCGAGGGCCATACGACCCTCAATCTCCGA
CGTGACGCAGAGTTCAAATCTCTGCAGCAAATCACGAACGTACTTTGTCTTCTCGGGACC
ATCTTCCGGGGGCATGCGCGGACCCAACTCCTTCAGCACAACACTAGCGTCGTTCACCTT
GTCGGATATCTGCTGACGAATGAACGGCAGGCACTCCTTGATACGGGAGACCAAAACACT
GTTGAGCACGGCGGTCAAATACTTGGTGCCCATGCGGCCGGAAAGTTCGGGGTAGTATTC
ATTGATAAACTCCTCCTCAGCCGCGCGTGCATCGGACATGGTTTGACCACTGTTGATGCT
CTCCTGGGAGCGGTTCACGACGCCAATGAAGCCAAACTTCAGCTCGTACTCGTCCCCCAT
CAACGTTCTATGGGCGGTGGTGCCACGGTCCATCAGGTCCAGCTTCGTCAGCACCCCCAT
GGTTCGCTCTCCGTGCGGGTCCACCATGCGGCTCACCGACAAGGCGGCGCTGGTGGCCAC
ATCTTGGTTGGCGGGGGTGATGGCCAGGATGACGGTATTCTTGTCCGCCACGTAGCGTCG
CACCATGTCTTCAATGTCGGTGACAATCGTTTCGGGCTGCCCTCGGATCGGCGTAGTCAC
CAGACCGGGAAGGTCCACCAGCGTCAAGTTGGCAACGGCGGCGGAGGAAATTTTAAGGGT
AATGCTCTGGGACGTCACGGTGCGGTCACCGATTAGTTCCCGCGTGTACCGCAAGATTTC
CTCCCGTATCAGGTTAAAGTCGGTGAACCGCTTATTGGGGAGATGGAGAAACTCCCCCCA
CTTACGCTTGTCGTTTTTGGGCAGCTGGTGGAGCTGGAGAACGATGGGGCAGCGCGTCAC
CATGGTGGGGCCTCGTGGGAGGAACTCCTCGCCGACAATGTGCTCCAGCACACTGCTCTT
ACCCGAGCTTTGGGAGCCGACCACGGCGATCTGCGGAAGGGTAAGATCTAAGCTCACGTC
GGAGCCAGAAACAATGTCCTGAAGACGATTGACTGCCTCGATGAATGTGTTCATGTGGTA
CGTCAACAATTAAAAATAAAAGAAATCAATGTGGAATATCTATGAGGATTTTTTTTTTCG
TTTTGTGCTGTTTTTCAGGCGATTGCCGTCCTTAACTCTCTATTTGGTTTGTACTAGTTG
TCTTTACAGGAAGGTAATTTCGTAATGAAGTCTCGGCAAAGAAACGTTTGAATATATCTA
TGTCTCTCTTTTTTTATTGAAGAGTAATAAATGAAAATAATTAAAAAAAAAAAAAAGTTC
CACTAATTGACGTAAACTGGAAAAAAATAAATACTCTGTCGAAATCAAAAATAGGGCAGA
GAGAAGAGAATGTGCGTTAAATAACCATAAAAGAAATACGAAGCAGTTTCAGCTTTTTAT
ATTATTATTTCCACAACATAAACAAAATCAGTAGTGTACAACAACAGAACGAAATTTATG
AGTGAAGCATTGGTAGCCATCGCTACCAGCGGGGTCTTGTCGCATCTAACGCAAATTTAT
CTTTGCGGGTGTTGACAAAGCAGCCTTCTTCGTGAAAATACACACCCAGTTGGGTGGAGT
CCGACTGGAGGGAAAGCGGCAACTCCTCGGCCGTCGGCTCCGCTGGGGTCCGTCGGAGTA
GCACCTCACTCGAGCTTAAAACATGGATACGATTGCGGCCGTACATCCACGCACGTTCAT
CAATCAGTGTGCGCCCACTAAAGGTTTCATCCAGTATCGAAAGTACTTCACCGACCTCCT
GTAGCGCATCCGCATCAGCGCCAGATAGAGAAGAGGGGTCCAGACTATGCTGCACCACAT
CCATAAAGTTCAGCACCAACCCCGTGCCGTCTTCTTGCACGGGTAGCCACACATACTCCT
CCTCCCGTGCTGACGTGTGACTGTTAATCGCAGAAGGTAGCGGTGCGTCCGTTGGTCGAC
TTTCCTTTTGTTTTCCCGCCGCAGTGTCCAAAAGAAGGCCCAACTGTGGTACAGACGCGT
GGAGGGAGGAGAACTGCAGGGCCCCCGTCACCTCCCCTGAGGGATGATGCTCGGTAAAAT
CCCTCGCCGCCAACCGCACCACCTGTTGCGCAAAGTCACGCAGTTGCTCCTTTTTGGTGG
ACGTTAAATCGCGTGTGAAATCCTCGTCACTGTGTACGATAAAACAGTGATTGGTGTCAT
CGGTGAGTTTCACTTCGTACTCGTAAAACTCGCGCTGAAACTCTGGCTCTTGGGCCTCCA
TAGCGGTGGGCTTTCGGTGGTGCTTCTTTTTCCTCGGCCAGTGCTTGAACTTTGGTTTCC
GCCGGAGCACCTCGTCGAATACGGGAGCGGAAACACTACTCTGCGCCCTTTCCAGCGCCA
ACAAATGGGTAGCGTAATCGAGAACGGTGGAGGAAATGAGGTAGCCAAGCAAAACTTTCA
CCAAGTACTTGAACACCACCGCCATGGACTCACTCTGCGGCTCATCCGTCTGTCCGTGAG
TGGCCCAAAAGTGCTCCAATGTAGTTTCTGGGATTTGTATGAGCACCGCCACCACCGTGT
TAACGATGCCCTCCTCGTTTTCACTAGACCAGGACGACGCGACCGCCTCCCGCACCATTT
GGAACGCTTTACCGTACAGGAGAAAGGACTCCACCACGCGGCCGCCTATACTCTTCAACA
AGGTGTCATTGAATCGGATGGGCACGTGTTTCACAACACGGAGGGGGAGCATCATGGCAG
TTTCAGCAGAATCCGCCAAGACATCGGTGCAACAGTCTAATTTAGTCCTTGTCACATGTA
AACGACCCTTCACCCACTCGCTGACGGTCCGGGTCACGTAGACCTCACCAGATGATCCCA
AGGGACGCATTTTTCTCGGTGATTCACTACCTAAACGCGGGTCTGTGGAGGAAGGGGAGA
CGGGAATAGCCGAATCCTCCTTTAACAGATCGCTACTGATGGAACTGGGTGATGTCAGGA
GAAAACTACCCGCGGTCGGGGAGTGCGGTGACGAGATATACCCACTCTCCAACACGGAAG
ACGTCAATATACTTTTACCATTGCGAAGCTCCTCTAACACCGCTACAAGAAGCGGTTCAC
ACAGCGCCACTAGCACCTCTCCTAGTTTTGTTTGGCATACCGGATTGGTATAGCTCATTC
TTGTTTCCTTGCTAGGGGTGTAAAAGGAGAGATGAGAAATATAGGACTTCCGTACTCTTC
TCACGCAGAATGGAGAGCGAAACTGAACACTACTGGTGAAGCATCAAAAAGGATACTTTA
TGGTGCAAGGCATAGCAGGTTAAAAGCAGTGTGCAGTGAGTTGGAGGCACTCACTTAAAA
AAGGAAAAAAGTTGGGTGATGGATGGAAGCCTCCAATGAGACAAGCTTAAATGTAGTCAC
GGCGTAACAGGCATGAACACAGCCATTCGGACAGTGAACGAGGTGCGACTGCATTTCCTT
CCGCACGGTACACTTCTTCAATTTCGTATTTTCTGGAGGACTTTTTCATCTTTTCTATTT
CGGCGAGCCACGGCGCGTACTCTCCCTCTCTGGTCGCTTTCTGATTCAGTCTATCGGATA
GACTAGCGGTCATGGCCGTGTCGCGGCTGGTGAACGCCCTGGAGGTATCGGGTGTGGATT
CCGGGTTGTCTGAGCCACTGATGTGGTGACCCCGCAACCCCAGCCAACGGACCGCGGCCA
CCCCTTCATCCACCGTCACCCGTTCGTTCCCAAACTTGTACTGTAAAAGTATGGCCAACC
CGCTGGGGTTGTAGTCGACCAGTCCCACCACGGGAATATGAGGGGCGGCACGATGCATAT
TTAGCAAGAGCCGGCGGGCCGCCAGTGTGGGGAAGCCATGGGAGGTCAGTAGGACGCAGG
GGATCTTGTCGTAGATCCGCTCCGACATCAAACGAAAGAAAATGGCGTGCTTCTCCACCA
CAATAATAAAACGTGTTCGACTGGAGAGCACAAACTTTGCAGAGGGTGACGAGGCTACGC
CGGCTTCTGTCGTCACGCTGAGGCACTCCTCGGTGGAGGGAATCGTCACCCCTTCCGCGC
ACCCATCCACGCCACTTCGAGTGTCCTCCTCGCTACGCAAACGACGGCTGGCATCGTATA
GAGCGGTGCCGCGGAAAGAAAGGGTGCCGCCGACGGTTCCCCTCGTACCGGCAAGAACCC
CCAACGACTCACGAGGTATCCCCAGTAGGGTTGTCAGGCGCATGACGGTATGATTGACGA
CGTTCTGATGAGGTATTTTGCGTATCAGGTGGTAATAAATGTCCCGGTGTGCCGAAACGA
CGCCCTCCATCGCGTTCTTGTACAAGAGATCAATAATGACGAGTTCGTTCCTGTACTCCA
CGAGCGCTTTGGTGTTACGGACGTTCGCGGTCTGGCGCGTTTCGGTGAGCTGTTCCCGGG
CCTTGTAGGTATCATTTATGCTTTTCAAAATAACCAAAACATACGCCTCTATTCGTTTCA
ACACATCCTCCTTATCGTAGAGGGTATTCTTGCTGAAATGAAGAGGTTCACTTTCTTTGG
CGAAGGTCGCCTTGGACAGGCTAAGACTCGTATTCGGATTAAACGGGCGGCTTCTCTTCA
TGTCAAGCGGTCTACTTTCTTTTATGGAGGTGAGAAGAGAAGGGAACAGCTGGCGTAACA
AGGTGGTGTAATCGTGTATTGGGGGTCAGGGGTACGAAAGGACGCAATGAAAGAAAAGCT
GTAATGATTGGGTGTTTTTTAACTAGTGTACAATTTGGTCTGTTGATTTACTGTCGCGGC
CTCTTGTTGGAGTTTTGTTTCCGTTTCTCGAACCACAACTTGGACACCGACTGTGAGAAA
TCAACGTGAATTCTGCTGTCGTCGAGTAGTGACTTGTCCATCTTTTCGTAGGCCCGTTCA
CAGGCCTCCGTGCTCTCAAACTCCACAAACCCGTAGCAGAGCGACGCCTTCGTCTGTTTG
TCCACCACGACATCTGCCGCTAGAACCTTGCCGAATTGTGAAAAACACAGCTTCAATCCC
TCACTGTCCGTCAGCGGGTTCAACTTGCACACAAACAACACATTATCTGGCGGGTTGATT
TCATTATTCACGTCGGTGATGCCATCCAGTATATTCAGCATGAGGCGCCTCGTCTCGTTC
GTCTTCTCTTGGTTCTTCTCCCGCATCAGCCGGCGCTTTTCCTCTCGCTCGCGATTGCTG
ACGACATCGTTGAAGGACGCATCGTCGTCGGAGCTGAGGTAGCCGCTGGAGCAGTGGGCG
TTAAACGTAAAAGCACCCCCACTCATGGGAAGTACAAGAGGGGACTCCTTCGCCTCCAAA
TGAACCTTTTCCGCCGCCGAGGCAAGTGCGTGGAGGTGCTGTCGGATGGTTTCTATCAGT
CTTTGGGGAATCCAGTACTCCAACACCTTCAGGGACGTGAGGGTCTTGCGTAGAGCTCCC
TTCTCTGATATAGCGCCACTTGTCACAAAAGAGTCCGCGCCCACCGTTGGTAGGACCGTC
CCACCATGTATACGAAGAAGTCGGATGGGTTTAGGCCAGCGCGGAGAACCCGGTACAATC
ATACTGGGCATCTCCTTTCCCATCTCCTTGTGGATGTTGCTCCGCCGCTGACAAGCGTTT
AACACCTGTATTCCCTCCGTCACGACCCCAATCGCAATGAACCGATCAGAGAGGAAATCG
AGCGGCCTATCGGACAGGGTGATCCCAAAACGGAACCGTCTCGAGCAGCGTCCATCCTTC
AGCCACTCCTCCTGCATCTGGGCCTCCACGATGAGGGAGCCCCTCCGACCCAGATAGCCA
GGAGAAGCCGCCTCCGCCACATTGGTGTAGACCTTCTCTCCCGTCTCTGTGTTACCGGTA
TATATTCTCTTTTTTCCCAATGCAAACTCATTTTGGCCGGCGTTGTGACCCCGCACCACA
GCCGACTTGTGACTTTCGTAGACGCTTGTGGGTAACAGCAGTATGGCAGAGTTGGAGGCG
GGACACGACGCGTTTGCCGTTTTCCCGCAGTGCTCTTCCACGATCTTGTCCAGCACGCGA
TCCGATTCGTGGGAGAAGAAGAGCACGCTGTCTGGGATGAGCTCACTAACAGCGCTGCCG
TCAAAGAAGCCGCAACGTATCAAATTCACAAAATTTCCGGTCAGAAAGGGAAAATCGGCG
CCGTAAAGATCTAGGATAAGAGAACCACATGACAGCTCCAGCAGGACAGAGGATGTGCCA
AGAGCTTTTTTGGGTGGCATCGGAAAACTAACTAATCTAATAGGGGCAGCGAACAGAAAA
TTATGAGAGACGGTGCATCTATATCGACTTTACAACAAGAAGGTGCATTCAATTCCACAC
AAAAAACAAAACAAAGAGGAGATTAATAATAGTGACAATAGTAGCACACACTGAGCTCTG
GTGAAAGTGTGCAGCACTGCCCTTCGCACGGGGGAGGGCACCAAATGAGAGGTCGGCTTT
CGAGGTAGTGACTCACCAGACGTTATCTAATGTAGAAGGAGTCACCCATCTTACTCCATG
CAGCACCGCAATGTGGGCATTTGTTGCTTTTCGCTATCCAGCCATTCAAACACTCGGAGT
GAAAATAGTGGTGGCACTTACCCTGCACTACCTTAGACTCCTCCGTGTCGGCACCCAATA
CCTTTTCATACAGCATACCCTTGCAGATGCTGCACTCCTTCAAGTACTCGCTGTTCGCAT
TCGCCACTCTGGCGTTGATAAACAGGTGTGTGACCGTCACCCGTACCTCTGGTTGTGCAT
CTGCCATTGTCGGAGAAACTTAAACGGTGATATCACTTTTCACGAGAAACAAAGGAGGAA
GTGTGGTGGAAAACGAGCTGCTTCGAGAACTCGGCGCGAAGACAACCAAAATAAATCGTA
ATGTCAAACAAATACAGGCAGCCATTCCGTGTAGGAACTAAAACAGCGAATGCCAATAGC
CGTCACATTATGCCTGTGAGTTTAAACAGTGTCCACCGCTTCCCACACAATGGGCACGCC
TCGCGGGAGACGAGCCAGCGTGACATGCAGTGGGAGTGAAACAGGTGCCCACACGTACCC
CAGGCAATAGAGCAGTTTCCTTGCAGTTCATCTCCCTCTGTATTGAGCACAATGGAAGAC
ATGATTTGCTCCGTTTTCGTTGTACCGGCATAATCCGACTTGGTGCACGGCTCTATTCCA
CTGGCTGCACATTCTACACACAAATTGACAAGAAAGTTTTTACATATCCCACACGAATCT
AACGAGGAATCCCAACACCAGGTACCAACCGTATCCCAACTTTTGACCGTTATCTCGACC
GTACTATCCTCTTCCTCATCTTGTTTATCACTCATTCCAGTGACGCATAGTCCGTGCTAA
CTGTAGAAGAAACAGGGGTGAGAAGAAGTTGTTCAGTTGGGGTATCACAGGTCAAAAAAA
AAAAAAAAAAAAAAGTCATAAAGTCTTTCGGCAATCCTACCGTAAAACACGACGTATATA
TGGGGGCGGTAGTATTCCGTGAGTCACATAATAAACAAAAAGAATCTATGATTTTAAAGG
GTGCACTCTAGTAACAAATCAATAAAAAAAAAAAAAAAGTGGGAAGAACAGCGTTCCTAT
TTCACTTTATCACGAACGGTTATTCGCTCAGTAGCCACCAAGCAGTCTGCTCTGCGTCCT
GGCTATGCGGTTATTCTCTACTTTGAGCTGCTCCACCTGCAGCAAATGGTTGCGCTCCCG
CTGTTTGTACACCTCCAGGTCTTTCTGGAGCGCCCCCCACCTAGTTTCGTAATTCCGTAT
CTGATCCTTGTGGAGCAGTAAGGCCTTGTTGATACGCTCCAGCTGGGACTGTGCCGCACG
GGACTCCCGCTGCTCGCGCCCTAATTGATTCTCCAGCAAAATAATGCGCTGGTTGGCTTC
CTGCAGTTGTCCGTGCAGGATATCCTTCTGCCGTATCGCTAGCTGGGACTCATTGCAGGC
TCTATCCTTGGCCTCCTGTAGGCTCTTGAGCACCTCCTCCACACGTTGTTCCAACATGTC
GGCGCGCTTCCGTTCGGCGGAGAGGGAAATCTGCTCTTGCTCCTTCGCCTCAGAAAGGGA
GATCTCCGACTCACTGATCTTGCGGAGCAGCTCATCCTTCTTCTGTAAGAGGGAAGCATT
CTCGGAGCGTAACTTCTCCACCTCATTTTGGGTCGTTTGGAGACGGTCACGGAGAGGCTG
GATCTGACCTTCACTGTCGATTTTGAGTTGCTCCAGTTTGTCGCACCGTCCTCTATACTC
GTCTAGTTTGCGCTGTAGAATTTGCTTGTCGCGGCGGGACTCCTGCAGCTGCACCTCACT
GTCCCGACGTAGGTTGAGGGTGTGCTGCTCATACCGCAGGACGGCCTCGTCTCTCTGTAC
TTGAAGGGCAGAAAGTTCCGCATAGAGCCGCTTCAGTTCAATCTCCTGCGACTGTCTCGT
CTGTGCGTCGAGCAGCTCCGTCGTGCTCTGCATGTTTAGGGCGGCGTTAATGTGAATATT
AGAGGGGTTCGCCGGGTCCAACCGTGCAAGTTGCGTCCGCAGCTTCATGCCCTCCAGTTC
CAGCGTACGGTTGATGTTCTGGAGCTCCTCCACCACGGAACGGTGTCTCTCCTCGACGAT
GCGAAGGTGCGCGTTGTGGTTGTCGGTCGCCATCCGCAGTGCTTGAATCATCTTTGCCCG
AATACGCTCCACCTCCTGTACTTTGTCCTCATTTTCTGTTTTCAGTAATTGTAGTTGAAT
CCGCTGCGACTCACTTTGGGTGTTGGCTTCGTTCTCGGAAACATTCCTCGATTGCAGCCG
CTTTTGCAGGAGGGAGCACGCCTCCTCCAACTTCACGTTGGCGACACGGAGTGTTTCGAT
TTCGGTCTGCAGATCGGTCACCTCTTTGCGCCTCTTCTCCTCGTGCAGTTTCATGTCGCT
CTCCGCGTCTAGCGCCCGTGTCAGCTCGAGGCGCATTTGGTTATACTCCTGTTGGAGGTT
CTCAATCATTTTGCGCGCCGCCGTCAGTTCATCTTCAGACTTTCCTTTTACATGTTTCGC
AAGGTCTTCCGCCACCTTGATGGCACCAGACCACTCTGACTGCTCACTTTTCAGTGTTTG
AAGTTTCGCGTTGAGCTCCACCACCTCTTTTTGGTACTTTTCCAGTTGCTCATTCTTCTC
GGTAATGGAACTGTCATAACATTGCAGAAGAGGAATCGCAATGTCTGGCTCATGCATTCG
TTCCCGAAACTTGTCGACTTCATTTTTCGGCAACCGCAGCAGCTCCTGTATTTGGTTCTG
AAGCCGCACGTTCCAGTCATCACTGACCCGAAGTCGTTCCTTCAAGTTTTCAATTTCGGC
GTAAGCGGCATTCAACTGCGACGCGTTCTGTTCCATCGTTTAAGAAAAAAGATGCAAATG
AACTAAACGTAATAAATAAGAAAAAAGAGGGAGAGACAGAACATGTAGCAAACAGGAGAA
GGCAGACTGTGTGTAAGGGAGTAAAACACCAACATTTTCCTCTGGTGGGCACTCGTCAAC
ACGATTAGATATTGATAATAATAATAAAAACGAAGAAAAAAAAAGTTAATATGATTCCGG
CACGTCATCTTTCACGAAGAAGATCATCGCGCTGGAAACACTTGATTCTGACAAAGACTT
GTATCTATAAAAAACAATAAAAGAGTGTGGTGAGGAAAGTGAAAACTTAAATAATAAAAA
TAAAAAAAAGATGGATTAAGAAACTATAGCAGTTTAGTTACTAGAATCTGCCGCCTCGTC
GGTCGTCGAATGATCCTGGTACTTGGCGCGCATCACATCTTTATCCTTCTGCTTGGCCGC
GAACATGGCGTTGTAGAGGGGACCAGCAATGGTGGTCTGATCGGCGTGATAGAGGGAGAC
GACATCACCCCCGAAGAGCGTCGTGAAAGGTGGGGGAGAGTGTTCCCCAACGGTCTCCAG
GATGGAACCACCCTGCTGCTTGACACGATCGGCCGTCACAAAGATGGCATACCGCCTCGT
ATTCAACTCGTACTGGTCGCAGTATTCGCACATGAGAAAAGATGTCGCATTGAGGTAGGG
GCGTCCGTTGCAGGTCACTGGTAAAGTCTTAAACCCGGTGTAGTACTTTTTAAACCGCTC
CTCATCGTCCAGTTGAGAGAGGTTGTAGAAGACTGGGGTGCACATGGCGTTGACACCGAG
CTTCTCACTGTATTCATTCAGCTTTTCCCCCAACTCCTCCGAGTCAAAGCGGTAGGGGGC
ACTTCGCACGGCGGCGATGACGCCGTTTAGCACCTCATCCGCCTTCACGGACGCGTTGAT
ATTCACCACCTCCTCCAGAGTGAGCCAAATGCCGGAAATATCTCTGGTTCGCAAATACGT
CTCAGAGTTCATGACCAAATCCTTCGTAAAGCCAGACAAGGGCTTGGTGGAGAGGTATTT
GGGGGTGTACGCCCTATTCATCCCAGTCTTGTTCAGGCGTCCCAGCTTCTTGAGGTACTC
CAGCACCTTGTCGTCGGCGTTGTCTTCTGCGAAGCTGGACAGTGAGGTTTGGAGTACGTT
AAACATATAGGTGGGTCTGCCATGGACGTGCATCTCCACACCGTCGGCATCGGTCGCGTT
GACGGTGACGCCAAGGTTGCTGTATCCGAGACGGGTGGAAAATATATTGCTGGTGAGGCC
GCGGGACTTGACAAAGCGGTCCAACTTTTCCCCCAACTCTCCCTCAAAGTGGGAGCCGGA
GAGGTTCGTTGGTCCCTCTGATTTCTGTTGCTGCGGTTCCACCGTCTCCTCCGATGCTGC
GTCCTCCTTTGCTTTTCGGGTCTTCTTCGACTTCTTGGACTTGACCTGCGGGGTGAGGGT
GGTGGCCTCGTCAAGGGATTCAAGGTCGGTGGCAAACGAGTCGTCTCCCTCGTGCGCCTC
CAACACCTCCTCCTCCGCATGGGAGACGGTTTCGTCGGCCTCGAGATCCTCCACCTCTTT
ACTCTGTTGAAGGAGCGTCTCGAGTGTATCGGTGGGAGTGCCGGAGAGGACGTCCTCGTG
CAGAGAGTGCTCCTCCACCTCGGGTTGGGTGGACGGAATTACCACCTTGGGGGCTTGCGT
GGCGTTCGGTTTACGAGACGCCTTTGGGGCGGCGTAGAGAGGGGCTGTGGCGGCGAAGGA
GGCAAATCTAGAGTACTTCATCATCAAGGCAGAACCCTGGACGGCACTCTTCTTTCTGAA
AATGGAAAGCATGATCTGTAAAATAAGGTGAGATAGAGATGGATAAAAAAAAAGGAGAAA
AAAGTGCGCGAGAAAAACTTCTAGTAGGAAACAACAAAAAGGAAAGGGGGGAGAGAGAAA
GGGATACTACGCACCGTTCCATATCAAGCAACACGCTGCTAGAGACATACACAAAGAAAA
CACTTGGCACAAAAACTAAATCTCGTAACCATTAAATCTATGATTGGACTCTCTATGTGC
GACAGTAAACCAGTCAAAACAGTGGTGCGCTAACGCGGCATCAGCCTCTGCGCCGCAGCG
CCCGGAGTCATTTCTTCCTCAGCCACAGCTGCACAGGCGAGTGGTCACTGCTGACAATCT
CCGGCATCACAAAGCAGTCGACCACGAACGGCTTCAAGTTTTCAGAAACAACGAAATAAT
CAATGCGCCATCCCAAACCCTTATCCCGACCGTTGAGCCGGGCCGACCAAAAAGGTATAC
ACGGGTCCTGCATTGGGGTACAAGAAGCGGAAGACATCAAACGTGTCCGTCTTCTTCAAG
GTGGTCCGGAAGGACTCTCTCTCCTCGGGTGTGAAACCGGAGCAGCACTGCATGGTCTTG
AAGGTACCGGAGTAGTATCGGTCAAAGTCCCTCTCAGCCACATTTAAATCACCAGTCCAA
ATGAGGCCGTGATAGTTTTCATTTTTTACGGCCTTTGCATTGTCGGTGCAGTATTTTTTC
AGTGACATCAGGTAGTTTCGCATACTAATGTCAAACTCTTCCGTGCGATAGGCCAGACGG
TCGAGGGTCATGCCGCTGTTGGGAACGTAAGTGTTGATAAACACCAAGTTTGGGTGTGCG
CCTTGCTCCGTCTTTGGCGTTCCTGGTGCGTCCAGAAACGTGGACAGAATGCGTCCTTCC
TCATCGCCGACCTCACTTTCTTTCGCCCCCAAGAGGTTGAACCCCTTCGTATGGGTGGCC
TTCAAGGCAACCGATATGGCGTCCGTCTTAACATAGGTTCGTGTACCAGAATAACCTTTT
TTGACTCGGCACGGATGATCAACAAACGTGTAGCCCTCAACCACTCCCAGTTTGGCATTC
GCCTCTGCCTCGGTGGTATTCAGCTTGGTCTCCTGCAGCGCTAGAATATCCGGGGACTCT
TTGGACAAAAAGTCAGATATCGCCTTCGGGTTCTTTTTCAGAATGCCCCGTAATCCAGCC
ACATTCCACGTGATAAACTTGAACATATTTTCCGGATCAAAGTCGGTCTTCTTGGTGATG
CGTTCAAATGGCAGCACCTCACCCCAGATCGCCTCCTTTGACTTACTTTCCGCCATCGCC
GCCAGGGCCTCTGGTGAGCGGACCACTTTCCCTACCGTGCGATTGCCTATTGTTCTATTT
GTTGGAGGAGCCGTTGTCTCAGAGGGAGACGAGCTCCTCGAGCGCTTTTTCGGTGGCATG
GAGAACTGTTAAAAGTCGGGTGTGTAGACGTTCTTTGAAGTTGGACATGACATCAAAAAA
GTGAAGAGAGATAGAGAGAGAATGATAAAGACAGTAAAGCTGTTTCTTTCAATGTATGGC
CACTATTTGCTTTCCTGACGGCAAAAGGCTTTCCCGTTATTTTTTATTTTTACGTTTATT
CACAACCGTTACGTTTATCGTCGGCGCTTCTTCTTTTCTACCAACTTGGAGCCGGGAGGT
CCAGCCGCCTTGACCTCTGCCGCGTCCGCCTTGGGTCGGTGAAAGTTGGGGGCATTGTTG
CCAGGGGCGCGATACGCCTGCGGCTTCTCCTTCACCTCAGTGGTGGTCTTCACAGGGGAG
GCGGGTCTCGGTGCGTAGTCCTTGGTCGCCTTCATCTGTACCCAATGGGCGCCGTAGAGC
ATGGGGAACTTCTTGGTCACCACACACTCCCCGTTCGTCTTGTAGAAGGCCACCTTGTTG
TCCACCCTCAATTTGGTGAAGACATTGGTGCAGAGGAAATTATGGCTGTCCGGCGCCCAA
AAGGTAAAGCTGCACTTGTCGTTCAGGCTCCCGTTGGGGGTGGCGGAGGGTACCGCGGTG
GACGATGGTTTGATGGAGTAGAACTTGTAATCGCCCGCCAAGTTGCCGCTGCCGCCCATG
ACAATTTCTTTGCCGTCTGGTGACCAGTCCGCCATGTTACGAGGGGCCTCGCCAAAGGTG
AGGAGCGCAATGCCCTTCTTGTTGAACAGCGTCACCTTATTCCGTGGCATCCTCCCGTGC
ACCACCAGCAGCTCATCCGAGGTGGGGGACCAGGCACAGTAGTGCACGGTGTCTCCTTCT
CCTGAAAGCTTCACATCTGCCACACTCTTGTTCTTCACGTCGACAATGTGCAGACGGGCG
GTTCCGTAGTAATTCTTTCCGCTCGGGTCGCGTTCGGTGGACACCAGAAATGCCACAAAA
TCGCCCGAAGTGCTCCAAAAGAATTCGGCCGCCTCGGAACGAGCAAAGCTCAGTTTAAGG
AGGGGGTCCAGCAAGTTGGGCAGTCGGGCGATCACGAGGGAAGCGGGCTGCTGTTTGTGA
AACGGAATAAACACAGCGAGGAGTGGAAGTGCAGTGGACGGGGAAGCAGAAAACACGGCC
TCCTTATCTTGGGGGAGATTGAGGTTCATCTTGCACAACGCACCACCGTCGGCACTGCCG
TCCTCACTACCACCAGAGAGAGCACCGTCCAGGACGTGGAGGCAGTTATTCACGACCCGC
ACGCAGAACTCTTCGCTGCCGGTCCACACCAGCGCCGGCCACCGCGACTGCATGACCTGC
TTAATCACTTTGCCTGTCTCACACTCCAGGACGAGGAGATTTCCATTGGGGGCTCGCTTA
GCGTCCATGGTGGAGAAGGCAACCAAATACTTTCCACAAGGGGAAAACTGCAGTTCCTTA
ATAATCGCGCCCACTTCCATTTCAAACAGTAGCACGAAGGTGAAGCTGTCCCCGGACGCG
CGTACCTCGCTGTAGCGAAGGTGCGTTGTCGAGGCGTGGGCAAACCGGTTCTTGTGGGCG
GGATTAAACACTACTTCACATTCTCTGTAGTCACCCGTGTACACGGCACCGTCCTCCGTC
AACTCCGTGAGGCTAGCTTCCTTCTCATTGTACACCCCCACCAGCAGTTGATCGTCCTTT
CTCAGAATTAAAGGAAAGTTCAACTCCATCGCTCTACCAAAAAAAGAGGGCAAAGAATCA
AAAATACAGCTGGATTCTATAAAGCAAAATGGGGATGGGGAATAGAAGAATGTGAGGTGA
AGGCGTCATTTTCTCAACAACACACAGCACCAAAACCGCATCACAACGCAAATAATAACA
ACAAAACATTGCACGTAGAAATCTATACGGACGGTTTGGTATTCTAACTCTAGCTGTCCT
GTGGCAACGGTAGGACGATCGGTAGATCGGGTGGGAGTGGTTCATCTATTTTATACTCTT
TCAGAAAAGGATTGAAGGACAGCACGTCATCGATTTTAACACTGTACGTCTCACAGATTC
CCTGTATCGTATCGAACTCCTCCCCTTCGTCGGTCTCCTCCTCACTCTCAAAGTCCGGCT
CTGCCCGTTTAAGACTATTCTCCGACGGCGGTGACACCTCATTCACGGTTGCCTCTGAAA
CCGTATCCTCCGACGGTACCCGCTGCTCCCGCGGTGGCGACCGTGCAGCCGACGGCGGAG
AGGTGGAGGCCACGGCACCTACTGGAAGATCAATCGGGACACTCTTGGGGGAGCTGTCCT
CCCGCTCCGAAACGGGAGACACAACTTCCGGTTGGGGCGCACTCGCCAAGGGGGATCCTC
TGGGGGAACTCTTCGGCTGCATCAGGTGGCGTAACTTGATGTTGGAGTTTGGGTTTAGAT
TAGGGGTGAGGGTTCGCTCCTTGTAAGGCTGAGGGGGTGTACCCCTGCGAGAGAGGGTGG
GTGGTGGGGCGCTGGCAAACTTTCCAATAGACGGCGGCACATCCGAGCTGGGCGTCGGCT
CCTCCACCTCGAGGGAGATCTGAGACGACTTAACCTGCTCTGGTGGGGTAATCTCTCTCT
CCGTCACGCTCTTCACCGCCGAGGCGGGAGAGGACACCCCAGACGTACGGGGTAGAGAAG
GACTAGCAAGCTCCGGCGGCGGCACCAGGGCTGCGGTGGACGTGCTATTGCTCCGGGTAC
GCACCACCACCATCGCCTGAGACGCAGAGGAGGTGGAAGGAGAGCGTGGGGATAGCTCGG
ATCCTTTATCTGCCAGGGAAGACGGTTTGCTAGGAGGAGATTTCACCGCTATCGGACTAC
GAGCACTACTGACCGCCGCCGGTGGGGTTGTGTTGACGGAGATTGATTTCTCTCTTTCCT
TCGGTGCTGCACCACGTGTGGGTGTCTCACTTTTCGGCTCTGATGGTCGCCCCTTTACTT
CTTTCCCCAGCTCTGCACGAGGCTCCTCCAGTACCCTAGGAGGCACCTTCAAGTAGGTAT
TTTCCGGGAGCGGCTCCGTGTCACCAATCGACGCTAACATAGGGTTTAACTGTCGGAGGG
CAGCCACACTCACCCCCAGACGGGCGCTCACATCGGCTAAGCTGTCTGCCTGTGTATTGG
ACTGGGCATACGTCCTCCGCAATAATGCTGTGGTATAGGCTAACTGTATAAGGAGACGGT
TCGTCTCACTTAGGGTGAGTTCACAACGGGGGGAGGTAGCCTCTATTGTATTTAATGTTT
CCTTGAGAAACGCTACTTCGCTTGATACCGCGCTCATTTGCGAACTAGGACAACAAGAAA
AGGAAAGTGTAATAGTGTGTTCATTCACGTAATAGATCCATGACTGCCATCAACAACGAG
ATGAAGCCACCATTGTACTGGACAACATTAAATAAAAAGATATCAACGAAAAAAAACAAG
AAGAAACGTTTTCATTTTTAAGATCCTCAGAAAGAATGAGCAGTATACTTTTTCTGACAT
TTCTCTCCTTCTTCGCTTCATTACGGCACTTTCTTTATAGAGTGCATTCAGCTTTTCGTC
GGTGTAACGAAATACAACGAAAATGAAGTTCAAAAAAAAAAATTCGTTCTTTGTTTTTAT
TTTTCTTTTACATAAAAATAATAAATTATAAAAAAAAAATCGGTTACCCGTAAAAGCCGT
TTCGAACACCAACAATATACAACATGAAACAAACAGTGAAGTTCAAGTGACGGAACAATA
ATATATTTTTTTTCTTTTTTTTTTTTTTTTTTTGAGCAAGTGATTCACTCCTAGTGGTCT
TATTCTTTTTAAGTGCAATCACTCCTATTTTAATTTTTGAAGGGCATCTGTCGCCGATAA
ACATTTTCCTTTTTCTACTTTTATTTCATCGGACTTCACTATTCTACGGCGTCCGTTCAT
AAAGGTGTTCAATAAGTTTTCTTTTGTTTCGGTTAACAATATAATAATAAATAAAAAAAA
AAAATGTAATTATTTTGAATGTTTTTCCAAAAATAAACTGTTTTACTTTTATTACTTAAT
TATGTTCTTTCTCCTTGTTTTATTAGCGATTACTCGCTCAACAATAGAAAAATATAAAAT
ATAAAACGGTCTACATTTACAGCAACGCTTAGAAGGGGGAATATATAACAATAACCACTA
TAAATAACACAAAAAAAAAAAAACACTTATTTATTTATTTAATTAATTATTTTCCACGTT
TTTTACTGCGTTGCGTTCCGGGGGCGGTCCTCCTCGGGTTCTTCCGTGTACAGGACGCCT
ACGAGGGGTTCCTGCACCGGTTTCGTTTCATCCTCGGCCGCCGGCTCCACGCACCGCTCC
TCCAACTGTCCTTCCATGACCCTTCTGCGCTCCGCCAGGACACGTTTCGAAAACGCCTTG
TACTTGAGGTGGAGGTAGGTGGTGGAGAAGAGACTGGACACCACTAGACCCAACAGAACG
CAGAGTGGCATCATCAGGCATCGGTTACGGCCGTAGCAGTAGCCGTTGGTCAGTTCCTTC
TGCGCCTGCTTGGTGTACCACTCCGCGTAGAGGAAGCGGACCAGAATAATGTTGGAGGTC
ACGTTACCCAAATAGCAAAAGTTATAATGCTTGGCGACATCCTTGGCGTAGATGGTTCGC
ATGAGAATCACCGTCTGCGCCGCCTGAGAACCGTTCGCCAGCGCCGTGAGGACGTATGGG
AAGGGGAGGGCGGCCGTGGGGAGGCAAATGAAGAAGACCATGGCGAGGATCATCAGTATG
GTGGGGACGTAAGGAGACCACGTAATCAGCACACGCTTTTCCGGTGGACGGTGCTGCGTC
AGGTACTCGAAGGCGGCCATGCCCAGTCGTCCGACCGCACTGCCCGCGCCATTGAGCGTC
GTCAGAAGGGTACGAAGATTCTTATCGGTGGGCTTTTTCGCAATCGCACCGAAAACGTAA
CTGGAGTTACTGATGACGACGAACTCCGCCCCGGTCAGGCAGAAGAGGGTCCACAGAATA
GACCACAGACGTAGGGTGAGCAAGTTGCGCAAGAAGCTTTCCTGATATTGAGGGGCAATA
AAGTCCACCTCGGTCTCCAGCTTTCCGCCATCCGCCGCCTCCGCCGTGTCCTCCACCTCG
AACGGGTCCTCGTTCACATCATTCTTCTCCTCCTTCCATTCCTGCTCTTCTTCGGTCGGC
TCAGACTCTGCCTCACGGGACTTCAGGAGAAACTCCAACGGGGTGGGAACAAAAATCAGT
ACAAGACTTAAGGTGACCACAATCGCCGCAATCGCGAAGCCCTTCTTGTACCGCATGACA
AGGTCCTTGTAGTTCACCAAGGCACTCTGCGTGGGGAGGAAAATGACCAAAACGATCAGA
ATGACAAACGCCAAAACGACGCGCCACATCGGGGGCTTTTGCCGTAGGTACTGCGACTTG
CCGGCCTTGCGCTTCTCCGCCTCCTCGACGGACAGGTGGGACTGCTGATAGCCAGTGAGA
TGGTACTTGGGGAGATGCATCACAATCAACTGTGCCACACCGACGCAAAAGGCGTAGATG
CAGAGAAAATACATCAACCACGGCAGCGAACCGTCAAAAAAGGCAAGCTGGATAGCACCC
ACAATCGCAGAGCCGATACCAATGTACGACTTGAGAAGTGCAATAATGGGTCCTCGTAGG
GTTGGAAAGTGGGAAACGACGGTCACCACGTTGGCCAAGTCGAACAGAAGACAACCGGAC
TTCATGATGGCGTAAAAGACCGCGATACGGACGATGGAAGGCTCGATATAGTCGGAGCTG
GCAAACGCGATGAGCAGGGTCCCCAAGCAAAAGAGAAGCGTGCAAAGAATAGAGATGGGG
AGGGGCCCGGCATAGTCGTACAAGAAGGCGTACGGGAGGACGAAGCAAGAAACGCATTCG
CCAACGACGGAGATATTCACCAAGTCCTTTTGCTTTAGGTGTAGCTGCTCCTGAAAGTAA
CCCGAAATTAAGTTATAGGCGTACGAGAAGGAAGTGCACAAACAGCCAAAGCAACCAATA
CACAGGATGAAAAACCGCTTGTACTCGTTAATCTTCTTCTGTCGGGCATTGGAAAGAATA
TCCACCTTCACCTTGTTGTTGTCTTTTACTTCAAAGAAACCTCTTCTGTTCTCCTCTTCT
TGGGAAGACATGGGTGCTTGAAATAAAAAATATAAATAATAATTTTAAAAAAAAAAAAAG
GTTAATCTTAGAAGCAAGTGGGTGGGAAGAAGTGTAGTAGAAAGAAAGTGCAACGCATAT
TGGAAACCCCACTTGAATTCTGGAGAACGGGAAATAACAAAAAAGGCATGTCCACATTTA
ATCACAGTAGCAGATGGGTGAAAGGGGGGTGAGTAAAATAATGTGACTTCTGAAGAAGAA
AAAAAAAAAAAGGCAGCGATGCATCTAGGGATCCAACAACAGATTTTCCAACACCGTAGT
GAGAAGCGGAATGATGTGAATCAAAGGGGTGGAAGAGTAGTCGTCGTCGAGAAATGCCGC
CAGAGACGGGCAAGGGCCCATTTTCGCCAGCAGTCCGGTCGTCTCCAGCTGCAGCTGTCC
AATCCCATTGACCGCCTCCTCCTTGATCTGGCCCGTCTTGCGCTGCAGCTGGCTGGTGTG
GGCGACAAAGACCGAGTCGTTCAGGCCGTTTCCGTCAGTGGTCTTTTCTTTTTCCTCCAA
TGTCTGTAGCACCCGGTTGGCCTCCTTGACGATCAACTCCAAGTCGGTCGGGAGTGACTT
TCCTTGTCGTTTTTGTAAGGCACCACCAGCCGGGCCTTGTGACAGTGGGGCGACAGCAGC
GGATGCTACCGTAGACTTGGTGACCGCAGCAACCGGAGCAGGCGCTTCCCTCCTTGTTTC
TGTCTTTTCCGCCTCCTTCGGTCCGCTCCCACTCAATTTTGACACCTCGGAGGGGGGAAT
GGCCGGTGGCGGCATAGAGGTGATTCGTTCCGTAGGGATGGAGGGGGCTTTTGTCTCTTC
CTGAGGACAAGGCAGCGTTGGGTCCGTTTCAGTGACGGGTGACATCTCCCCCGAGGGCGA
GTGCTGTTCACCGGTATTGGCTGCCTCTGCTTTTTCTTCTGACAGCATATCCGCAAAATT
CATGTCCACGTCGCCAAAGTCAATTGGAGATGCATCGGGCTCGCCTTCTTGGTTCGTCGG
TGGTCCACCAGTTGTGGCGCCATCACCGAACACAAAGTTGGGGAAGTCAAATCCGTCTGC
TTCGCCCGCGGGTGGATGCGGGGCACCGTTATCCCCTGTCCCCTCTTTATCGGAAGGAAA
GAAAAAGTTAAAGTCCGTGAAATCGACGTCCTGTTGCATGTGGTGAGTCAATAGGGAAAA
GGAATGGATCAACTCCTACCAAAATAAAAGTAGTGAAAGAGAAAAGAAAAAGAGATGAAT
GGAACCCATGGAGAAAACCCCGAAGCACAGGAGAGCCCAATGACAGCAACCATAAAAAAC
AAAAAGAATGAACTCTACAAAAATGTTACAAATGTACATTCACGTGGTCTTGCGTGGGCC
GTGCATGGAGGCTGTACTCTGCAGCTTGCTGATGGCCGCCAGCAGTTGATCATTGCGGCG
GATATCCCTCTCAATCCGGTCTCTACTCTCTTGATGACGGAGAGAGTCGTAATGATGAAT
GTACGGCTGGACAAACGGGGTAGGAAAAGGTGTCACGACAGCACCGTAGTGGGAGGGACT
TCCCGTATCCACGTAGGGAGGGGGCGCCACGGCAAGATTCCCAGAGGTGTTCATAAAAAG
GTGTCCTGGTGGGGGCCCATTGAGAGACGCCGGAAATGCATCCACCGCATTTTGTGTGGT
CATCGTGGGTTGCTCCGCCTGTCCTCTGGATACGTCTGCTGGTGTGTGTACCCTTTCCTG
TTTTTTCTCCTTTCGGTTGTGCTGTTCAGTAGTTTGAGTAGATGCGTTGTGTTGCGACAA
TGCACTCCGTTCCACTGGGGTGACACTCACTTTAGAGCGCTCTACTCCCTCTTTTTCTTT
GGTGTCTAACAGCCGCATACAGCGGCGATTTCCACAGCTCCACCTCCTGCCGAAGTGCCT
CTTCATTGTCACACAATGAAATGTCATTGTACGGTGAGTCACCGCTGACATTCCCCGCCC
TCAGCTGAACGGAAGGTTGGGCCACCTCCACTCGCTTAGGGGAAACGCAAATGTCACTCA
CGGGTGGTGGAGCGCTATCAGCGGACGGAGGCACTGGCGTTGGCGTGTGGTGGGCCGTTC
GTCCTGTGGCTGTCATGGAGGAAACTTCCTTCGAGTTGTTGAGGTGGCTGACGCCGGATC
TGGACGGACACCGCTCGGTGTACTGGTTGATTACCACTGGTTCTTTCGCCTGCGTGAGGA
AAAACAGTTTGTCCTGTAGACGTGTATTTTCCCTCTCCAGCTCATGCCTGCCTTGTTCCA
AGTTCATTTGCGCAATCAAGGATTGTATCTCACCCAAGTCCTTTTCGTACAGTTGCTTCT
GCTTCTTGTACTTCCGACGGAGCGATTTGTAGTTGTGCCTCCAGAACTCCGCTTCCCCAC
AGGCTGGTTGAACACGACGGGGGGCACTGAGTGCGCTGCCATGACGGGTACCAGTCGTCG
CCCTCTTACCACGCGCGGGACGACGGTGCGAAGAAGTCTCGCTCACCGTCGAGGAAGAGG
AGGTGAGCGGCGTGTACTCCTTTCTGCTCGCTGGATGAGCCCTACTGTCTTCGTGTCCGC
TGTTAAGACTACTACGTTCTTCTAGTTTTTTGGATAGCTCCACAATCTCCGACGATTTGC
GGTCTACCTCTGATTGTAAGTGTCGCTGCTGAAACCTTGCCTCCGCTAGCTGTCGTACCA
GATCGGCCACTTTCTTCACATCAATGACGGATGAATAACTAGCAGTGGATTCCGAGAGTG
AAGCGTTGGTAATCATGCAGAGACTAAAAACTACCGAGAAACAGACGGGGATGGGAAGAA
GGAGGAGAGTCGCAATGAAACACAGAACACACCCGCGATACCAACTAACCCTATTTCTAG
CACAACGCACAATCGGGTCTCTAAAGTATATTGTCGGTCTATGAGCGGTCACCAGTGCTG
CCATTCACGCTGAGCTTCGCACTTACCCAGCGCAGGAACACATCGTCAAAGTTGTTTTCC
CGCAAATCTAACACTTCTAATCTATTATTCAGGTAAAGTGCGGCAAGGAATGGATGGGAA
AAGGGCATACCAGACCCTTCGGTACGGTAATCTATTTTGGAAAGATAATTGTCTCGAGCG
ATAATACGACGCAGCGCGCTGTGCCGGCTCCCGCTCTGCACAATCAGCTCGGATAAGGCA
GACACCACCACACTCCCCTGCAAGTAGTTGGATGACAAGTTCAACTCCCGCAGAGCCGTA
TGGCTCGACAGGGAGGACAACAGCGAGGATACGGAACTCTCGTCTAATCCGATGCGGTTG
CCCGAAAGGTCCAGTACCGAAAGAAAGGAGGCACGATGCACATAGTGCACCAACGGTGCC
ACAATGGAAAGGGAGTTGTGGCTCAGAATGAGTTCCTGTATTGGCAGAGCCGCCGAGATA
AACACCTCACCACGGGGTGTCTTCATGGACAAATCGGTGATTGGCTTTCCATTCTCCAAG
TGCTCTAATAGTAGTCGTAGGCCACTGTCCCCAATATAGCTCTCTTTTAACGAGAGGGAC
AGCAGTGGTAGCGACGCGAGAGAGGGGGCAAAGGCCGCCATCTCCACTTCATCCAACACG
ATGTTGTCTAATACGACGCACAGTCCACCGTCCGGTGTGCCGCTCGACGGCATGGCCCCG
CACACCCTGCGCACGACATTACGCTTGACCGGCGTCAGTTCCTCCTGGCTGTGGTGATTG
TAGAGCGAAAGAAAAGCGCTAGCAAGGGAGCTTTCCATTCTATAGGCTGTGGTGCTACAC
AATAGCAGAGAGAGAGAGAGAGAAAAAGAATACATTAAGCGAAGGGTGGACACCCACAGA
GAAACCCCTAAAATAAACAAGTGTATTGTCACAAAAGAATGATCTTTATATTGCAACCTT
AACTATAAATGTTATTAAAACAATAAATTGTCCGTTATGCTACGCCGTCGGTAGCGGGGC
CTCGCACATCTCGCACACCACCATTCCCGGTGCATTCAGAAAAGTGCACACACTACAGCT
AATGCCCTGCTCCTCGGCCGATGGGGCGTCCATCACCGGAAAGGCCCCGGCCGTTGTCGT
GGCGGGTGAGTTCTCCTCACTAACGCCAGTTTTCTTGGCGATCCCACCGAGGCGGGTCTG
TCCGAAGGCAACCCCAGTCTCCCCAACAGGAACCTTGGGGGTCGCATTTAAGATCTCCGG
AGGGATGTACTGCCACTCCCCTTCGTCGCTGGGGGCGCAGCTCTCCGCAATACAGTCCGT
GTAGTTGACCGACAAGTTGTCCCCATCCAGTATGCCCACTTGCTGCAGCGTGGCGTCGTC
TATTTCATCGGCATCCCCGTCCCGCAAAGGTTCGTCGTCCTCGGTGGGCAAAGTGGGTTT
ATTATTCGGCAGCAAAACACGAAGCTCTTGCTTGCCCTTCATGATCGTGGTCTTCTCCCA
CAGTAGCACATAGTAATGCTCTTTTGTAATCTTATCGATAATGTACCGCTTCAAGTCCCC
AAATTTCGTGTTGTAATGTATACCATTGGGCACATCCGCGCTGGAAAGGGTTACCACTGT
GTCGTAGAACTGTTTCTTGCTCTTTTTAATGTGGAGTGTTAACTTGAAACTACCGTCGTG
AAAGTTTGTAATTTTCTCCTGAAAATTACGCAGCAGCAGTGGCGTGCATTCTTCGCATGG
GCGGGGATAAATGGAGCGGACGCCATCTTCTTCCACTAGGTACACAGTGTTTTCGGCTGG
TAACACATTCTCGGGAGTGAAATCAGCACTCGTGTGGGATTCACCCTTTTCTTTCATGGC
GGCCTCGTTTGGTACGAGCATTTGGTCGAACGCTAAAATGTCCACCAATGTCACGTACTC
CTCCCAAGGAAGGATCACCATGGGTGGGAACCACTTGCAGAAGGAATCTTTCCCCGTCTT
GTACAGCTTCGCTAGTCGAAGTTCCTCCGGAGAGAGCCAAATGTGCCCTGCACGCTTCTT
GTGCGCCCCATCCCACCAAGAGTCCACGGGGTTTAGCCACTCGTGGGATACCAGGCTGGA
GTGGTGGTCGCACACAAAGGAGGAATAGTTAATCACCGGAAGGGAGGACAGTAGGGAGTT
CAGGGGCAGATCATCCGCGGCATCGGTATCACTTCCCCCTTCGCCGTATTCGACCTCGGC
GTAGATCGTCTTGTAGTACCTCGCCACCCACCACGTCGGTACGCAGCCGTAGTACGTGCG
CTGGACAGGCGGCTGCTCCATCATGAGTCGCTGGAGTTCCTCTCTGGCTTCTTCGAGGTT
CTTCTTTGCCTCCAAGTCCGGTCGATACGTGTCGTTCAGTCGCTCAAGAGCGGATTTCCC
ACGCGCCAGACCGCTAAACATCTGCTGTTCCCTCCTCACCTTTTCATACTCCTTTTCCAG
TGAGGTGATCTTCTTTTTTTGAGCCTCAATCCGCACCGCCTGCTCTACCCGCCACGCCTC
TGCCTTCGCCTTGCGTTCCTTTTCGTTACTGCCACGCTTCAACGTTTGACGGTTGGGGTG
GTTGGCGGAGATGTACTGTTCGGGGGTCTTTATTTCGGTGGTCCGCAGGAGTCGCTCGAC
CAAGGGAACCGACGTGAGCCTTCCAGCCGCGTACAAGGTGGGCAGTTTAGATTTTAGCTC
AAAGCGGCGCAGTTTCTCCGTCTGCTGTAGGGCCGCGTCGGAGGCGTACAGCTGCACACA
GTCCGCGCAGATTTTGGTCTCCGTCGTGGGAAGAAACGGAAGCGCTGCCGTTAACGTTTC
CTTGCTCACTGTGAGATACCGACCAGAAAGACGGGTGTCTTCCTCGAGAATTTGGAGAAT
GCGCTCGATCCAGTACTTGCGAACGCTGTTGGGGACAATGCGAGGACTGCCCTCTGGCTT
CAGCATGCCGTGCGGGCAAACCAACCGGTGGGAGATGACGTTTCCCTCATTGTCAATGAA
CACCATGTTGTTAATAAAGCCGAAAATGGTGGTGGATCCTAACAAGAAGGAGGATTTGAT
CTCCAGGTGGGCAGAGGACGGTTCGTGACGGGTGCGCCACATGGCAAACGTGCCGGTAAA
CCCTTCCATTTGAATCGTGTGCCGCCACCGCATCTTTGCCTGGTAGTACTCCTCCCATGC
ACGGCAGAAGTGTTCGTCGACAAAGACTGGGACGTCCTCATCCGTTGCGTCCTCCCCTTC
CTCCGTGAGAAGTGCTGGTGGCCTGACAGGGGAACCTGTGGCGACGGAGGAGTGGTTTTC
CATCACCACATTGAGGACATACTTGTCCTTTTCCACGTGGTTGGTCATGTGGTCAATAAA
GGCGGCGTTCGAGGCGACGCACACGCTGCACATGTTGCTGGGCGTGAGCAGCAAAGACTC
CATCAGCGCTTCGCCGGACGAAAAATCATCCGGGGTGGTATCCAGCTGTTCGCCGCTAAT
CTCGTACACACGCTTGATAAACGCGACCATGAGCTCCAGGGTCTCTGCCGGCACCAACTT
GAACGACCCCCAAGGGGCTATTTTGCGGTGGTGGCATTTAATGCCCTGGCACGAGGAAGA
GACGTTGAACTCCTGCACCCCTTTCAACAACATGTTCGTGGGGACCTGCTCCATACCGGC
GTAGTGCACCACACCCATGGTTTCCGTCATACTGTAGTCATTGTACGAGGGTGTCAGCCG
GGGGCTCTCTGGATTTTGTTTGCCGAAGCCCCGTACATCCACAAAGGGCGGCAGGAAGCA
TCGACCAAATGCGAAGAGCCAGTTCACCGGCACACAGTAGTACTGCGTGTTCAGATTGAA
GTGACGAGGTTTCTCGGTAAAGAGAGACGCGGAGGCCTTTGCCCACAGCTGCAGCAGCTC
CTCCGTGCGCGAGCAGCCGTGGTCCCATCGTTGCATCTCGGCCAAGAGCTGTGTATTGAT
ATGGGTGACATAGTTCATCAAGTACGGCGGAAACTCCTCGGGCTCGGGGGAATCACTCAC
AGACTCGTTTACTTCCGCCGACGTTAAAGTTTCCGCGGAAGGCATCCGGTAGTAGACGAG
CAGGTACGCATCTTTCGAGGAAATGCTCCCGTCCTTCTCCCCTAATTCCGTCACCACTTC
GTCATTCATGTCGAGCCACAGGTTGGCGGTGGTGTGATCCTCCCGCGTCACCGTTACATT
GCTGTGGTACGTGTAGTGGCCACTTAGCGCGGTAGAACTGATGTGATTCACCACGCCCTT
TAACTCGTACACATGTCCTTTGGCATCTTTTTTCGCGCCAGCCTCCACTTCTGCTGCTCC
GTTATCCTTCCCTTTCGTCTCGTGCCAGTGTTTTAGATGCGGCTCCAAGTCGAGTACGGT
GTCAAACGTGACGGGGGTGTGGATTTTCTTACGTTCCAGCGTGTGTAAGTCAAAGTCAAA
GCGATTCAAGTGGATGATCAGCACCTCCGGGAGATTTCTCAAAAACTGTTGGGAGGTGGC
GGTGGAGGACTGGCCGCATTTCTCACACATGAACCCCTGAATTTCTTCAGGCGTACGGAA
AGACGAGAGGGAGTCCTCCAGGCGGCTGTGGATGGGCAGAGAGAGATACAGAAAGGGTTC
CGCTCTAAAGGCGGACGCCCCGCAACTCGCGCACCGTCGATCGTACAGTAAAGTACCGCC
GAATGTTTTCTCCACGGTTGTCTTAACGTTAGCACCACAGTGGGTGCCCAACCAGTCAAT
CAGCAAGGCGAAAAACTCCTGTGCGTCCTGCTGCACCAACGGGTCGAGAGAGAGAAACTT
GACAAAAGAGCTAGGGTCCACGCCGCGACGTCCGTCTTTGCTAAACGCCATCTCGGCAAA
TATCTCCTTTAACCCACACGCCATCAGTTCACTATCCCCTTCGTCGGGTTGGGTGCCGTC
CGCCAGTATGGCACGCCGCACACTGGGAATTCTAAAGAGGAGTTGTATAATGGAGTTAAA
GTAACACGTACTACCCAAGTTGATTAAGCCTCGCCACAGACACGGCGATACGTTACCTGC
CTCCCTTCGCAGGTACGGAGGAGTAGCAAACTCTGGTCTTTTGCCTACCACCGCCTCCAG
GCACTCCTTCAGCGCCGCCTCGTCGGTCCCAAGGGCCGATATGCCAGACAAACAGAATGT
GGACGCAGGACAGTGCAGAGCGGCACCCTCCTCCCCCGTGTGGTCGGTGAGACAGGGCAG
ACGACAACGGTAGGCTTCCTCCATAAAGCGCACATCAATAGCTGGCGCAACGTTCTTATT
CTCCGCCACCACCGCGCCGCTTAGGGTTCCCTCTTCCGCGGGTGTGAACGAACTGTCCTC
CACAACAACACCAACCACTTCCGCGGTGCGAGTGGTCGGTACGGTGCCATTTTTATCCAC
CGCTACCCACATATCCGGTTTATAGTGCTGCATTTCACACTCCCGCAAAACTTCACTCAC
CCACGAGTCGCAGAGCAGGCTGCGGTTCCAGCCGTTCTCGGTAAATGTATCACTGGTGTG
GGTCGACATTTTCGATGGTGCTCTTTTTTTCTAAATTTAGCTACTAAGCAACTAATAAAA
ATATAAAATTGTAGTTCAAAAGGAAGATGGCTCCTTCTAGTAATTTATGGGGGGAAAGGA
GGAAAAGGGGGATTGACACTCATCAAAAGTCAGCACACAAACACTCGTTTGAACCATCAT
TCGATACGGAGAAAAGAGGGACATTTCATTATTCTTTACAAACGAGAAACTACTCCTCTT
CTTGAAGGAAAGAGTAGTTCTCTGTATCTGTGACGTGTTTCATTACAACAGCTGAACGAA
CACGGGGTACTGATCCGACAGGGAGCACGACACCGCTTTCAAGCGAAACGGACTCTTCCG
CCTCTCCGTCATTCGTCCCTTTGGCGTCGTTCGACGCCTGCCACCGTGCTTCATTTTCCC
CTAGTTCCACCTGCACAAATGGTTTTGGCACCACCGTCCGACACCGCTTGTTGTACCGCA
GGAGAAAGGGAGAATACTGATTCGAGTGTGTTCGTGAACTCTTAAAGTTGTTCCTAAAGT
AGCACCGCTGGAAGCGGCCAGCCACCTGCGGTACAGCAAGGTCGCGGTTGTACTGGTTCG
AGAGATCCGCCAGGTGATCGTATATCCACTTTTCACTTCGCTCCAAGCTGGTGGCAGCGT
TTCCACCGGCAGGGGCTTCAGGCGACAATATGGTTGCTTCCTCCTTTGTATCTACCCAAA
CACCCTCCGCCGTGCGTGTCGCGGAGAGGGGCAGCGGTGTGCCAACAGAGTTGACATCTT
TGGTATCCGCTAAAGTGACAGTCTCCTTCTGCTCTCCATTACCACTCTTGCCGTTCTTCC
GATGTTTTTTCAAACCCGGAGACGGCACAAAGTAGTAATAGTTGGTCAACTTGTCAAAGG
CGTGTCGTCGAAAGGTGTTGATGGTTCTTTCGTGCTGTGGGGGACTTCCGCAGAGCTTAA
AGGCATCCTCGTATCCCTCCAACCCGTCGTTCCTCGGCAGTAAAAAGTTGCCAAGAATCA
CATCCGCTCGCGTGACACGGGATAGGTAATCCAACGCGACAGAGCGGTGAGGGTCCATCA
TTCCTTTCACGGTGGTGTTGGCCTTATTCGTATCGCCAGTGGACAAGGAGAATGGGCTGC
CTTGCTGGCTGACCTCCACCGAGGAGAGCAGCTGGCCGCCTTTCCCTAAACTCTTCCCCC
TATAGGACAGATCCACATTCGAGAGAATGCACCGAATGGGTTCGCCCTGTCCCTCGCTGG
CGGACAGCTCCACCGTCACGCCAGTGTCGTGTGGGAGAAGGCGCGCCTTCCAGACGGAGT
CTTGCCGCAAAAAGGTGTGACAGTACCCACACTTGCCGTTCTTTGCGGACCCGATCAGAA
TGTAGTTGGGTAGTTCCTCTTCCTCCTCCACTTTGGGTGATTCCTCTGTTTGCGATTCGT
CTTTCCCGGCGGTCACTTTTGCAACTGCATTTCCCTTATAGCGACGAACCATGTCTATCT
CGTGGACGGTCAACGTAGGGTGCGGTTTCGGCGGCATGTCAAGAAATGCAGACGCGAGCT
CCTCGGAGGAGTCCTGCACCGCCACCACATCTGTCCCACATAGGCGTATCGTCTGTACAA
TGCTGCCGAGTCGCTCCTCGAATGAGAGACGGCGTCTGCACCGATGGTGCGAGTGACAGG
ACGCATCTAGCGACCAGGACAGCAGGGATAGTGGGGGCCCACGCGAACTAGCGAATCGAA
ACGCACAAAGAGCGCTGTTAAAGTGCGCGCCGCGAGCACCATACGCCATCAGACGACTGG
GTCTTTTCATCATTTTTCAAGTGCTAGTGTACGCGAAAGGAGAGAAGAAGAAACGGTTCT
GGTGAGTGAAGAAATACATTCATCCTCACGATACCCAGAAATAAGGAATCAGAATTCTTT
CCAAAATTTTAAGAAAAATAAGTAACAGAGTCCACAGGAAAGCACGAAAGAAAAAAAAAA
AAAACGTTTTGCTTATTCAATGTGACGAATGCACTGCTCCACGTGCTCGGGAGTAAACCA
ATTGGTAAAAGACCCTTCCGCGCCCTTTGACTCGCAGGAACGCAGAAATGCATCTAGAAA
TAACGCGGTTCCCTCCTCCTCCCCACCCACGTGCACCACATTACCCCGTATCTCATCCGT
AGCCGTCAGCCCGTCGTCCGCCTTGGGGGAAACCGAGACAAACTTCATTGGGGGAAACAT
GGCTAAATGACGATCCACGGTGGCAGGTACGTCACCAAAGGCGAGGGACTTTTCAAGACT
AAAATGATCACACTCCTCCGCGTTCCTCAGCATCCACGATACACAGTTGCTCTTGTCGAC
CGCCTCTCTATGAATACAAACACTGTTCGGCTGCGATTTCACCACCAGGCCAGCGTTCGT
GATATTTCTATACGCCAAACGTCGGCGGTCCTCACACTTTGGGCAGCACTTGAGGGTCGG
CGTACCGGCAGGCACCGTCCGCGGGAACACTTCATCAAAGAGTGCAAAAGGAATGCCCAG
TACCGTTATCTGCGAGACGGGATTGCTGGGGGAGGCAAAGTGGGGCGATAACAAGTCCGG
CACACGTTGTAGATCCAACACCGCGTCATTGGACTGGCTGAAATAACGACCATACTCCAT
GAGATGGTCTTTGGTGAGGGATGTCTTCAATTCACAGAAACATGGGATGGAGGGGGAGCT
GGCCTTCACTTCCGTGACGATTTCGGAGAAAATACTGGTGAAGGCGGGGGTGTACTTTTT
GCTCAGAATTTTGCTGAACAGCTGCGTCGCCTCGTCCGTGTTCCCGTTTGTCGTGTGCCA
CACATGCTCAAAAAACCGACCAATGGCGAACATTCCCTCCCGCAGGCACACGTCCGCCTG
CTCCTCGCTCATCACGGTGGAGGTGCCGCCGGGGGCACTGCTGTTCCGATACTCCATCCA
CTCCTCCAGCCCGGACTCAATAGGGACCAAACCGGTCTTCTTATCGACGGTAACTGCCTC
GCGCCGCTTGCTACGGAAGAGCACCGCACCCGTGTAGCCACACAGCAGGAGCCTTCCTGG
GGCGGTTACGGAGGAGGAAAATAAGACACGGGAAAGATCGTGGTATACCTGGTTGAAGAC
ACGCTTGCCCGCTGTGGAGACGACGCAAAGGTTGCCTCCATTCGCCACGTACTTTTGCAC
CGACGACAGACAGGAGAGGTAGGGTTGACCGGGATGGATGGCGGAGGTGGTCAGCTTTGT
GCAGCTATCTGACAAACTGTAATACAGCCCACCCGCCTTGGACGGTGTTGGCGTCAACGT
ACCATCCATGTCCGATATAATCCAGTGTCCCTTAAACATCGTTTGGTTTTTTTGTAAATA
TAGGGTTTAATATTGTACTTTACTTGCAAGAATATTGCGCTAGAAAAGACGACCTTTTCG
AGGGAAGGGGAGAAAAAGAAAAAAAATATGCTCCACAAAAATGACCCCCCAAAGGGGAGC
ACCATGTAACCTCAAGCCAACGTTACTATTGTATGACAACATTGATGCATACTGATCCAC
AACACGCATTACATTTGCAACGTTTTAAATTCGCTTGTTTTGACGTTTAAAGAACAATCA
TAATAGTAAAAAGAAAGAAAGTAAAATAGAAAAAGCCCTCGGGTGCAAAGCCACCCACCC
ATTATAGTCTCTTGCGGATGGCGTCCGCTAGCTTCAGGGTATCCTTGTTGAAGTTACGAA
TACCCTCGGCGAGTTTCTCCACCGCCATGGCGTCCTCGTTGTGCATAAAGAGAAAGTCCG
GCTGGGACAGCTCGGGCAGCTTCTCGATCTTCTCGGTGCAGTTGTTGGCATCCAGTTTGC
GGGTGATGCTGTCGGTACTCTTGCTGAGCTCCTCCAGAAGTTTGGGGGAGATGGTCAGCT
TGTCGCAACCGGTCAGTTCGATAATCTCGCCAACGTTACGGAAGGAGGCACCCATGACGA
TCGTGTTGTAGCCGTGCTGCTTGTAGTAGTTGTAAATCCTAGTGACGGAGATCACACCGG
GGTCGGCGGCGCCAGTGAAGTTGTCCGCCTTCTCGGGCTCGCTCTTCTTGTACCAGTCGA
GGATACGACCGACAAAGGGGGAGATGAGGGAGACGCCGGCCTGGGCGCACGCCACAGCCT
GGGCGAAGGAGAAGAGAAGGGTAAGGTTGCAGTTGATGTTGTCCTTCTCCAGCTGGCGGG
CGGCCTGGATACCCTCCCAGGTGGAGGCGAGCTTGACGTAGATGCGGTTGCGCTGGATGC
CGGCCTCCTCGTAGAGCTGAATCAGCAGACGCGCCTTCGCCACCATCTTCTCCGTATCGA
AAGAGAGCTTGGCATCCACCTCGGTGCTCACACGGCCGGGGATGACCTTCAGGATCTCAA
GACCAAAGCTCACGGTCAGCTTGTCGATGGCGAGTTCCAAAATATTCTCCTTTTCGTCGG
CGTGGGTGTAGAAGGCGGCGTAGTTGGACAGGTTCTTCTTGGCAAAGTCCACGGCCTCAT
CGACCAGGTGCTGGTACTGGGACAGCTGAGACCCAGCGAGCACGAGGGAGGGGTTGGTGG
TCGCGTCCTCCGGCTTGAACTGCGCGAGAAGGCCAAAGTCGGCGGTATCGGCCACCACGA
TGGTGTGCTGCTTCAGTTGATCCAGTTGGGTGGTCATCTTTAGAAGTAGTAGTAGTAAAA
CTGTGTGTTAATAGGGAACTACGACAGAAGGAAGAGAGGAAAAGGATTCATTGTTGAAAA
CACTACGAAAGATAGGCTTGAGTCTTCTCCAGCACCAATCAATCACACAAAGGACATACC
GCCTTAGAACCACAAAGCCGTACACGCAATAAATAAGGAAATAAAGGGTTTTTTTTAAAA
AAAAAGTCAGACATCCGCCACCAAAAACAATAACAACAAAAAAAATACAACATCAACACA
CACAGTCAGCGACAACCACAACTGATGTGCTCTGGTCTACATGATGCAACATCCCACAGT
ACCGTGTTCACAATACAATAAATATCAACACTAATAATACATCTACAAATTACTTTCTGG
CGGTACACATGCTTCGATCTAACGCTTTCTCTACGATTTTCGTAATTTTTCTTTGTCCGG
CTTATTTTCATGGGGCACCGCGTCCTATTTTTTAGCATTTGCCGAAAACAATATAATAAA
GCGTATAGAAATATTCAAGTACTTTACAAAAAAAAAAAAAAATTATACATACATCCAAAT
AAAGACAGTTTCAACGGTTAAAGATAGTCACGGAAGAAAAAAAAAAAAATGAACAATGAA
AAGGCAGCCCAGTCCTAATGGGCGAGCACCCCAGTGTTTTTTTGTGCTGGTTCCTTGGAC
AGTCGTCGCTGAGAAGGAAGTAGGGCGGCCGCTGCTTTCGCCGAATTGTCAGACTTGCTT
GACAAGGGGGTTTGCATAGTGGGAGACACCGAATCCGCCCCTTTCGTCCCCTTCTTGGCG
GCGTACCCTCCGTCCTGTGGGGCGGCAGGGGTCCGAATAATAGGATTCGAGTACGCTGAG
GCGTCTATCTTGGACTTGGAGGGGGACGTCGGACTTCGCGTCGTGGCTGGGGGAAGGGTC
GTGGCGTTCTTGGAGTGGGACAGGGTCGTGCCGTTGCTCCTACTGAGTTCCAGCAGCTCG
CGGGTGCTAAGTTTGCCGAACCCGGACCCCTCCTTCACAGAGGTGCTCTGAGACGGTTTG
TACTCGGAGTAGGTCATGAGCGCCTGGCGCTTCTTCTTCATCGAGTTCGCCACCACCGAC
GCGGCGGACGGGTAGTTACCGGCGATAGAGCTGCCCTCCTCTGTCGTGGACAGCACCGAC
ACCACGCCTCGGTTCGCTGAAAAGTTGGGGAGCGGGGGGGCCCTCTCCTCTAAGACCGCG
ACCGGCTTCACCGTGGGCTGGGGCTTCTCCTCCACCTCTGCGTGCAGAGGCGGCAGCTCG
CCATCCTTCTTCTCCTCTCCCTCCTCCAGCGGTGGGAGTCCTTGCAGCTGCCGGATGCGT
CGCTCCATCTTCAGTTCCTCCTCTCTCTTCTTCGCCTCCTCCGCTAGTCTCTGCTCCTCC
TCCTTTGCCTTTCGCTCCTCTTCCTCCTTTACCATGGCTGCCGTGGCGCGTCGCCTGATC
TCATCCTTGGGGATATAGCCGGCCTTTTCCAGCTTGTCGTCTAGCTCGCCAAAGTCCTCC
ATGTCCTGCACCTCCTGGTAACCGCCAATGTACGTGTAATCGACACACAGCAGGGGCATG
GTGGGCATCCTATGTTTCTTTGTGGTTTTCATATAGATTTCCTTTGCTTTTCGCTGGAGC
GCCGCGTTGTCGGCGACGTCGACCAAATGATAGGGAATTTGCTTCAGAAACAGAAGGGTC
TCCAGCTGTCTGCAATGATCCCTCACCTGCCTATCGCCCGTCATGGACGTTGTGAACAAG
ATGACCTGATCCCCTGATCCAATCACGTCACGGTCAAAGTTTTCCACCGTGTTTCCGTAA
AAATAGTGCACCATTTTGACCATATCCTTTTCAGCCTCCGTGAGCGGTGTGTCCCCCAGC
ATTTCTATCGTCGGGTCCGGCATGCCAGTGGTCCCGTTCGCTGCCTTCATGGCCTCCCTC
TGGGCCGCCTTCGCTTTTGCTGCCTCGGCCGCCTCCGCCTCTTTTCTAGCCTGCTCCTTC
TTGCGTTCCTCTTCCTGTTTCTTTAGCTTCTCCTGTAGACGCGCCTTTTCCTTTTGCTTC
TCCTCCTCTTCCTTTTTTAGCTGCTGTGCCTTTAGGTCCTTATCGTGCAAGAATTGCACT
GCATCATCTATCGTGCGACGGCGGGCGGACACCAAATAAGCAAGTTCCTCTCTCAGCTCG
GGGTCGGCGTCCGGGCAGGCCAAGGTAAGAAGACGTAAAGCCTTCTTCTCAGAAGGGTAA
TCTTCAGTCATGATGTAAATGGATAAATATATATAATAAAATAATAATAAAAAATGTAAC
AATAAAAAGAAATTACACTTTCACAAAGTAAAGGGAGAAAAGAGAGAGAGGGGGTATGCT
TTTCCAACAACAAAAGAAAACCCAATCAGCTTACGTTGCCTTAAAGGCAAATATTAATAA
TATTAAACATTGCTTCATTATGGATTACTATCGAAATTACTTTTTAATGAGTGTGCGTTT
CCATTTTCTGCGACGAATTCCCTTCTCCCCCTTTACCATTTCCCATCCGTCCGCGTCGCA
GCCATCGACGGCTACAATACTCCAGTTGCCCATCCAGCGGTACCCTGAGGGAGGCTTGAT
GGAGGTTCGGTTCTTGGCCCGTTTGCCACTCGTGAACTGGCACACCGCATAGTTGGACGG
CAAGTGTCGTTTTTCCCATGAACCATTCTTATTCATCTTTTCGTGCTCGTAAATCTCCAC
AGATTGGTCAGATGGGGGAGCGACGAAAACTGGTGAGGGTCCGCTGGATTTACTGTCCTT
CGTGTCCGCCCTAGGGGAACGGGACCCTTTACTCTTACTTTTGCTCGACTCCTCCCGCGA
CAGGACGGGGCCACTTTCTTCATACGCCTTTAGTGGCGGAAAGAACTCTGGTTTGGGACT
GTTGGACCGACTGGGCGGTTTGGACTTAGACTTGCGTTTACTTTCGTTGGTGAACTCTGT
GTCATACTCCTGTTGCTCAGCGGAAGTGCTCTGTGAGCGTCGGATGGCCTTTTCCTCCTT
CTTGCGCGACCGCGACATCTGTTCCGCCGGTGCACACGGTTTTAAAAGAGGGACGCCTTT
GGTTCCGTCACACTTTCCATCGCCGTCTTCCAACTTCACGTCGGTTCGCGCCCACTCATG
CTTGACGCCGATCCGTGCCCCTGGAGACCAACTGCTAGAGCGCTTGTGGTGATGGGTTGG
TGCATCATCGTCGGTAAAGAACTGCGAACTTGTGCGGGAGTGGTTGCGTTTGCGCTTCTG
GTTGTCCAGGTGCGTCTCGGTTGCCGTTAGAATCATCACTTCTCCCGGTTTGGTAAAGTC
CTGGAAGGAGGAGGAGGATGCCGTTCGACCAAACTGCAGTGAGGCGCTGCGGGAAATACG
ACCTTCGCCCTTGGCCATGCCGGGGCAGATCTTCAAGAAGGTCGCGATCGGGGAGTGTGG
GAGAGGTTTCACCAGTGCGGCCCAACGCTTTCGTCGAACCCGGACACTGTCCGTGTAGAT
TGGGCTGTAGCGGCCGTAGTACTTGTTACTAAAGGACCAACCGTCAAAATCGGTATCAAA
CCGGTTGACGACCCAATTCTCCTTGGGCACCTTCTTCTTTTCGTTTCCAAAGGTGACTTC
ATCCCGTGCGCTCGGGTACCACTGCGGGCCGTCGATGCCGGACATGAGATGCTCGCCATC
CCATTGATCGTGCTGCTTGCCGGTGCCGCGTTCGTATTCATAGACACTGATGAGAGATTT
CCATGGAGCCACGCCACCGTTGGCGTAAAAACTACGAATGCCTCTCAGCCGCCGTGTGTT
TGGTACGTAGGTGTCGTTCACCATATTCGCCAGGGTGCCTGTCGCGTGTGAAATGTCATT
CAGCGCCCCTGATATGGGGTTCGTCACGACACCGAGCAACCCTTGCGAAATACCCTTCAA
GAACCCGCTCGTCCCACTCTCTGCTGCCCCTTCCCTCGGCTTCTGTACAATTCCCTTGAA
CCCGCTGGCGATCGCCGTCAACGTGTTTTGACTCTTCCGCTGCTTCTCTGATGTGCCAGT
GCCCAAACTGAAAAAGCGTGCACCGGCGTCTGTAAGGTTCGAAAAGGCCCCCAGACTGCC
GCTGGCAAATCCTTGTGCAAACTTGGAAGACCCCTTGGCGAGGCCTATCGCGAAGCCATT
GTTCGTGGTGGTAAGGCCGTCCACTGGATCACGGAAGAGACGGACGGCGCCGCCGCTAAT
ACCAGAAGAAGAGTTTCACTGGCGCGCCAATCAGGGGTAGGGAAGAGGCGTACTGTAGTA
GAATACCTTTTATTTGAGCAAACAAACCATCCATGTAGCTTCTGGCCAGCCACTCGGTGA
AGATGCTCAGTCGGTTGCTGCGCTTCACGCAGGCGATACCGGGTGTCACGACCTTAATGT
CATCGCACGAGCCGATGAGCATCGAGAACACGGCTGCCTCCTTGCTCTTGATCGATTCTC
GAATGAAGTCGGCCCCACTGTCGTCCCGAAAGAACCACAGACGAAGTAGGATGGGGTTAA
TAATGAACCGCTCCACAATCAGTCGTGTGGTCATGAAGTCCATCGACTTTGGTGCTCGAA
AGAATAGGGCTTCTTCCGTCGGGCAGGTGAACTTTGTGTGCGGCCGCTTCGCCGTCACGT
CCTCCACCTCGGTATTCTCATCTTCCATCTTGTCATCCGAGAAGGCCCCAAAGAATCGGA
ACAGATCCACCAGCAGGGCATCCGAAACACGGACGGCCACCGGGCAAAAGTCCAGCCGAA
GGTCTTGCACGTGCATCAGCGACTTCACTGGTGTGAGATTCCACACCAACTTGCCCGCCA
CGGCGGCCGTCTCACTGGAGCGACGGAGTGCCAAAATACACGACTCATAGCGCGGGGAGA
TTTCCGTTTGATTGTCTACTTGGTAGTTTTGCACACTGAACATGAAGGTCTCCACCTCCT
GATCACGGTCCCAGCTAAACCGGACGTCGGTAATGGCGCCGAATATAATGTCCCGGTTGG
GCAGCACAAGCGATACCGTCATGACGGACAGGTTGGCCAAAAGGTTGATTGGGGGTGGCT
TGTTCGCCAGCCAGCGGGACTGGTACGGGATAGGGGACTCCACCTGAGTCAGCTGCACCA
CCACCTGCCCAAAAGAGGCGTACGAGAGCTCGTACTGCAACCCCAAGGGAGCAGCCGCCC
TCTCACTCTTCGTCATGGGGCGCGACACATCAAAGTAGGTGACGTCGGTGGTGTTGTACT
CTTCATCCAGCAGCGCGATGCCCACGAGGGACGTGGTCTTGGTGTCCACCATCAAGGGAC
ACTGACACCCCGGTGCGGCGAGGCCGATCGGTCGTCCCTTGTACTTGCCATCAAAGGCAC
CGATGATGTGGGACGTGCGGTTTAACAGTAGAAACGCTGGCTCCTGTGGGGTTTCAATCA
CCACATACGTATAGGGGTCGCGAGACACAAGGGACACCTCCACAAACCGATCTCGGTCGT
GCTTCGCCGATTTGAGATTCAGCGGGTTTTCATCCTCCGACAGTACATCGTCGTCTTCGT
CTTCGCCCTCTCCTTCCTTCTTTGCCCATTCCGCATACGCCTCTTCCAGCTCCACAAACG
ACACCGAGTCTACGGCATCGGCGTAAGTCGTGTTGCGGTAGCACACCACCACCTCATTGT
GGATCACCTCCAAGTTCACTGGTACACCGTAGAGCGGGGCGGTCGGATCGGGTGTAATGT
GCAGATGGTACCCATTCTCTTCCACGTGATACTGTGTTCGGTAAAACTCCACCGCGGTAT
CGGGCTCTACCAGGACCGTGTCTTTTACCGACATGCGGAAGCTGCTATTGTCCACCAGTT
GCTCCAGCCCGCGTTGTATTTTGTGTACCTCATCGTCCAGCGCGGTGGAGGAACCGCCCG
ACCGTATGCTTCTCTTCTCGGGGTCCTCTGCCTTTTTGGCCTCCAGCACGGCTTGAGCGG
CTGCCTGCACTTCTGCTGCGTTGAGTGACACATGCCGGTTGCCCGACACATACAACGGAA
AAGCAGAACGGTTCACCACCACCCAGCGGGGGGATATTTCGACCAGAAGATAGCCCATTT
CTTGGATTTTGGAAAGATACGCGAGGTGAATTACCTGCATGCCCTTTTCCTCCATCTTTC
GGGCGTCCTCAATCGATGTGATCTCACGCGCCTTGCCCTTGTTGTCCACCCCCATCATCA
ATATCAACCCTCGCTGCTGGACGTGTAGCGGAACGGCCTTGGCGGAGAACTCGGATGTGT
ATAAACTCACAAAGAAATCTTCTTTTCCCTTGGCGTAATCCTTCGGACACGCCACAAACG
GTTTGTTCATGTTGCGTGGCAATTCATAGTAGTTGGCGTTTGCCCTCGTACTCGTAATTT
CCCCTTTAGCCGTGCACTCTCGTAGCGTCAAATCCAACGGGGTGTGATTCAACAACAGAA
AAGGAGTCGTGATGACCAGTTTGTTCGATGCCGTCAATATAACACGAAGGTACATCTCCC
TCCCTTTGCTAGATTTCAAAAGCACCACAATTGGTGTGGTTTGGCTTGTTCTTTTCGCAT
CCCTACCGAGGTAAAAGTCGTCCGAGGTGTACACCTCCTCAAGGGTCTTCCCTGGCTGTT
GGATCTCCAACTGCATGGCGCACTCTTCCACCATGAAACCAGCGGCCACGTTCACGTCCT
GATTGGCAAATTCCTCCACCTTTAGTTTCTCACGGGTCGTTGCTGCCTGTATCTTCCCTT
TCGCCTTTGCGTCACTAGACAAGCTGGTGGAAGTCTCAAAGTATAAATTTACGGCATAAG
GCAGCTTATTGTGCACGCTGTACAGTGGCTCCAAGGAAATCACAAAGGTCGGGATACCCC
CGCGCATCGTTTCCTGTCGCAGTATAATGTTAATGATGGTCGACTGTCCGCTGGGGGATT
GATTCTTGCAGATCAAACGAAACAATCGGCCAGACAGCGCCTCCTTGTACGTGGTCGACG
CGCCACCCTCCTTCGCCGCCGGGTGGTACTGCTGTCCCTTCAGTGAAATCGGTCGAATCC
ACAGTTTATCCGAAAGAGAAACGTTTGGCGCCAAGTACCGTCGGTCCGAGGGGTCGAGTG
CCGGCATGTTATCATCCCCAATTTGAACCGAGTAACGCAAATTGTTTTCCAGACATACAA
TCGTCTGGGAGCAGTGGAGCGGGAATATGTTCATGTGTACCCCTCGCTTCAGCCTGCGGG
ACTCCCCTTTCGTGATGAGCAGATGGGTCTCCACAATGAAGTCGTCCGCGGTGGCGTGTA
GAGGTGGATTGCAGAGGGATAGAATGTGCGGCTTGCCAGACCCGGAGGAGAGCGGCTGCT
CCCGCATGATCTCAATGTTTTGGAACACGCTGTTGATCTTCATGGAGCCGTGGGGCGGCA
CCGTGTGATGGTCCACCACAATCGTCGCATTACAGTAGTTGTTGACATGCAGACGGGCAT
ACGTCACCTTTTGCAGCTGGTGAATCCCGACGCTGTTGATGGACTTTTGGAGGTCAAAGG
CGGAGTGGGCCAAAATGTTGCGGGTTTGGGTCATGGCCAGACTGTTGAACATGTCCTCAT
TAAACGTCCGTGAGTTACCAATGGTCAAACTGTCCGCCCGCATGGTGGAGTCGCCATACA
CACCGGACGCCGCGTACTTGATATTCTTGTTGCGCATTCGGGCGTCCTTGCGAAACTGTT
GTCGCAGCTCGTGTTGAATCGACGACAGACTATTGTAATCGTTTATCATGCGTCGCAGTA
TCTTGACACTATGCGGCGACACCACCACGTCAAACCGAGGAATGCCGACGGTGTAGTCGT
GGGTAATCAAGCTGCCTGAGGCGGCCAACTCGAATGCCTCGACAAACGGCTCCCAGACGG
CGGCGCGGGTGTTAAAGTTAAACAGCGCCCCTTTCAGGTTCACCGCCACGTCCATGTTGG
TGTCCACGGAGACGAGAATGCTACGCATGTAGTAATGCTGCAGGTCCCCTCGCGATCCGG
AAAGCACAACGTCCACGATGGGCACCTCCAAGCGAACATCCATCGCCGGCATGCTATCCT
TGCCGGTGCAGCACCGGTAGCACAGGTGACCAGAGGCACTGGTCGACTCCCCGAGGTACG
CGCCCAACTGACCACAGTGCTCGCACTTGCCAGAGGACGCCACAGGGAACAGCTTTTTAA
ACGCAGCGTCCTCAAACTCAATCGTGGGCTTCACCCGTTGCACGGTGGCTTCCTCAAAAA
AGACGGTGGAAAAACTCTTGCCCAACTCAATAATCGATCGAATGAGGGTGGCACGAATAC
AAAGTTCAAGCGAGTCGAGAAGATAGGCGATGCTAACATTGTCCACGCCTGAAATATTAA
ACGCACAATTGGTGGGTAACAGAATGTGTTCTTCGTTTTCACCGGAGCGCACTTGGAAGA
ACTGTACGCTGGTGTTCCGCATGCAAACCGTGTTGTTTTCCGTCTCCTGCGTAAACCGTC
CGCGTAACTCCGACACCAGGGAAACGGAAAAATCGACAATTTCTTCGGAGAGGACTTGCA
GCTGGATGACACTGCTGCTAAAGGTGCAAGACAGCCGCCTCGACCGTTCTCTCACGTACT
TGTCCGCGTCCTGACGTCGGTCGTCCGTGACCTCCACCCGCCTTGCCGGTCGCGAAGCGG
TCTCATCCCTGTAGGAGCTGACCTCGGACGTCCGCCCCGACTGCGACTCCTTGTTCAGTC
GGGCGACAATCTCCGGTGGGGGGCGCGAGGCAATCAGGGCGAACCCGTCGTTGGGAATAT
TCTGAAACTCCTTTTCAATCTTCACGTTCGCGGCCGTCAGTAACGCCGAACCCGGGGCGA
ACCCCACGTAGGAACTGAGGCTGTACATGCCAGGAATGAAAATGGTGCCGTTCGTGACCG
TCAGCTCACATCCCTCCTGCAATACAATACAGGCGGTTGGCATCCCGGAGAAAATCAAAC
GGTGACCGTTCAGGTCCAAATGAAAGCAACACCGCGCGGGGTTGGCCGTCACGAGCACGT
GCTTATCATCCAGGGCAATGTCCCCGACCAGAATGGTGTTCGCCTCTTGGAGCTCCAAGA
CGGGTATGGGGTCCACTGGCACTTGCAGCACTCGATAGAAGAAGGGCAAGTACAGGTGTT
CTCTGGTGTCAAACAGAATGGTGGGAGAAACGGCTATCCGGAACAAGTCGGACGATAAGT
CGATCGTCGCGTCGGAAAAAATGGACTGACGCTCGTGATTCACCTCGTCTGGTTTAGCGC
GGTACAAGAACACCACGGAGCGCGCATTAATAAAGTCCACCACATCGTCCACACGGGAGG
TACGTCGCTTGGTAAACGACCTGTAGGTAGAGTTCATACCCTTTTCCAGGTTGACATTCT
TCGCGTCACCTCCTTCCGCCTCCACGTGCGCGCCGACATGTTGAAAGCAGAGATCGTCCA
GGGTGAAACTAGCCTTCGTGTCACCCCCGGATCTGCTCTCTCCCTCGTACACGGCGCCCA
CCGCACGAATACGGAAGACGTCTGAGATATCCGCCTCAAAAAAGCTAACGGTGATCTGTG
TTTTGGAAACGAAGGGCTGAACAACAGCATCCTTTTTGGGCATTCTCTCCCCTTTTGGTT
CTTCCTCTGCCAGCACATGCGCGTAATGGTGTTTCTTCTTTTTCTTCACCGCCAGTACAC
CCTCCGTCGCCGCCGACGCAAGAGCCGTACCGCCGCGGATCGTCTGACTTGCCGAAATCG
ACGCCCCACTGCATTGAGAAGAGTTGGTAGGCAGACCAGTCACTAGTTCGGAGCTGTGCT
GATTGAATATGCCCACAAAGTCCATCAAATGTAACGTTTGCATTTCCGTCAACTTGACAC
TGACGGACGGCACATAGACCGAGAACTCCGACACGGAAACGGGATCTACAGAAAACCCCT
TGACCGTCCGTTGGAGCTGAACTTCAATCACGCACTCGTCGGGGAAAATGTTCTCGTCCA
GTACGCTCACATACACCTGGTCCACCTCCACCTTGAGCGACTCTGTCCATCCGCCGGTCA
AGCCTTCGTCCGTCTCCTCGTCCGGCTGCACCAATGCATTTCCCACGACAACGTACCCTG
GGGAAACTAGAATACCGTTGACAGAGTCCACCGAGTGCACCACATACAGTACGACTCGGC
GCATCTTGACACTCAGCTCGAGCAGCTGCTCGTCGTGTTTCTCCAGCGTCTCGGCCGCCT
TGTCGGACACGTAGTCGTAGGCTTTTGTGCGGTTTCCTTCCGTAATGTGGGTGCGGATAT
CCATCAGCGCATTGTACAATACCTGGGTAACGCCGGGGATGATGACAACATACAAATCGC
CCACAAAACCGTCCAATTTTCGCGAGAAGAAGGGTTGGTCCTCTTCCAGTAGAGTTTTGT
TGCGGTCTTCACTATAGGTCTCCATTCGAACATACACCACGTGGTCATTCACCTCCGACA
CCATCTCCGAGGGCACCTCGCTCTCCATCATTCGCGTTTTTTCCAGGGCATTCATCAAAT
TGCCGACACGGCAATCACTCTTGTCCTCCGAGTTGCTGTTCTCGCAGAAGGTTTGCACAA
TGTCCTTGTAAAGCGTATCCTTGGAGTAGTGGTCCGTCATATTCAGTCGCGACACCGTAA
AGGTGAGAATGGAGGACTTGTCGGAGTAATTCTCTTGCACGAGTTTGGCGCTTGTCATGG
TGCCCACCGCCACTTCCTGATCTCCTGCCAGAAACACAAGAGACCCGGACTCTACCGTTA
ACAAAAATTTGCCCTCCAGCTTTGCCGGCGCTAGTGTTTGGCGTCTGGCGGGTGTTTCTT
CAGGGGAGGGGAGGGGTTCCTCTGTAGCCGGCATCATGGTCTGTGAAAACTGCGGTATGA
GGTCGTTCGTGGGGGATTCTTCAGGAGCCTTATTCGTTGTGGAAGGTGGTTTCTCAGTGG
TCTCCGTTTCCGCAGCAACGGGCAGCTTGATGGACAGCAAGGTGTTCACGAGACTTCCGA
TTCCCCTGGGCAGCATATTAATGGTACAGTTCACAATGCCCACCGACATGGTATTATCTT
TTGCGCGGAACTCCTGTAACAGTGCCCCCAAAAGCACCGACGACATCTCCCCTCCTTCCT
CTGCTGGTTTGGTGGTAAAGTTTAACTCATCCGTATCGCTGTCTTCCTGTGCATCCGACA
GGATGGAGGCCGGCAGGGAACTCGCCACGCATTGTAAAATGGGCCTGTTGGTAAACCGCT
CCGTGACGCTGATCGCGGGGATGATGGTCCGCATGTCTTGGTTCGCGTACTGGCGGAAAT
CCATCTGAGAAATGACAGCCGTGTGGGTGTGCATCCCTTTGACGTCGTGCAGCTGCAGTT
GAAGACCTTTGATGAGCACGCGTGTCTCCCTCTTTATGGGTGTCAGGACGGTCGGGGCAG
GTGTCTCCGTCGCTCGGGTCGGGGAAGAGGGGTGATCTGGTGGTAACTCGGCGACGGAAC
TCAAATCACTGTAGTACATGGTGTCGCGCGGCAGCAGTAGATTCTTTTGAAGCAAGGAGA
GAAGTCTTTCGACCTCTCCTGGGTACAGAAAGACGACCGTCTTCTCCAAGTTCAGCTCCA
CACGCTCCTTACTTGCCGCGGGGAGGGCGGTGAAGGAAAACTTCCCGGTACACTTGTCCA
AAATATCGGGAATATACACGTCGTCAATTTTAACGGAAACGGTCGTTTTGGGGGTTGCAT
TGTCTAGGCTAATCCGCGCATTCATCTCGCCCAGCCGTGCCTCTATCTTTCCAGACGAGA
AGGTGGTCGTGGGGTTACTAGCGTCCACCGCGAAGAGCAGCCTCGGGTGATACCACTGCA
CGTGGATCGACACGGAGTTTTCATTGGTCATTTCCTTCGCCAAGAGCGCCATACGCGCCC
GCTGTTCCCGCATCACACCCAGTCGACTGATCTTGGCAATCGGCTGGCAAGGCGAGACGC
AGTAGTCCAGTAAACCATAAAGAATGGGAATGGACACAAACAGATCGACCGTACCCAAAG
CCACGATGAGCCGATTCTTCTTCTCCACGGGGTCCCCTTTAAAGCTAAAGTCAATGGTTT
CACGTTCCCCACTCGGCACCGTGGAGGGCGTCTCCTTCGTCGTGGGAGTTGCCTCATCGC
CCATGTCCACCTTTGCGATATTAAAGTCGATCCCCTTTCCTTTCCGCTTCCATAAAATCT
TCTTTCCGGAAACGCAATCCCGCACCTCCACCCCCTTCACCTTGACCACCACATTGGGTC
CTTCCGGGAGGGTCAGGGTGTCAATAAACACAGAGTCCACCCTCGCCTCCATGATGGTAC
GTTTGCCGGTCGTCAAGAAGGGAATGGTGACACTGGGGGTCGTGATGGTGCAGCGGAATC
CGCTGGCGGCTGGGGCAGGGCTAGGAGACGGGGCAGGGTTGCCGCCAGACGTGTTCACCA
AGCACGGCGGTGGGGGAAGACTGAAGGCATTCATCACCGACTCGTTACAGAAGAAATCGT
AGATGGACAACCACTGGTCGGAAACGGCAAAGCGCTTTAGTGTGAATTCAAGGGTGAGCA
CGGACACGGTGAGAAGTGCCGTGGACGGCTCCACGACGACAGGACTGCCTGCCGCACACT
GCAAGGCTGCAGGTTTGCCTTGGCTGAGAAATGTGGGGGGAATCCCATTGGTGTTCTCGC
TACTGGACCCAGACACAATCTCATCCGCGATCGCCGTCCTCTTCAACGCGTTACGACGGA
CCCCAAAGTCATTGAGTACAATGGGACGAGTCGTCAGCGTGTCCGCCAGTTCCAGCACAC
CCACATCGCACTGCACAAGAGAAGAGGAATCCTCCCCGCGCACGTCCAGTAGCTCGAGCG
ACTTCCAGTACACGACGAGGTGATTGGACGGATTCACCTGCTCCAGCACAAACTCATCTG
ACACAAACTTGAACGCCGGTTCTTGTGCTGCACTGGACGAGTTGCCCCCCTCTTCCTCCT
CCTCCAGCTGTGTACACGCGAGAGTGAGGTGGCCCACTTTCAAGACGGAGATAATCTCGC
CATCGACCTTCTCTTTATTGTTATCCTGTGGTGGAGACACGAGCCACGGCAGCGGAGGCG
TGAATAGCTCCGCTTCGGTAAGCCCCGTGAGGGTCACATTGCGCTTCACCATTGTGCAGA
GGTCGACCAATTGCGAAGGACGCAGCAGGAGATCGACAGACTCGATCGTGACATTCACCA
GCATCGGCTCCGCGCTGTCTTGCGCCAGAGAGTTGCACACGACAATATCCGCAGCGGTGG
TCTCGCTCAGTAAACTATCCTTTCGTGTCCCATTTTGTTCACGCCAGAACCCAATTTCGG
AAAGTGAAATATTCGTGCGCTCTTGGCACTCCAACGACCGTAAGTTGTTTTGGATCGCCA
TGTACCCGACAGACCCGCAGAACGCATCCTGCTTATTCTCCCGCGCATCGAGGGGGATGA
CGATATTCACGTCATTGGCTACGACACGCATACCGAGGAGCAGACGGGGACCAGGTCGCG
GCGCCGCTCGCTTCTTGGAGTCCCCGTTATAAAGGGTGCGATCCGTCAAGAATGTGATGC
GTGAAAAGAACCCACTGAGGAAATAGTTCTTGATGACCATGATGGTGTGCACATCGACGC
AAAGGGTGCTGGAGCCCAACTCCAGCTCCATCGATCGGGAGTAGCGTAGCTCGGCCGCGT
TCGTGATCACGTCTTTACCGTTCTCGTCCTGCCCGAATATAGGCATCACGGGACGACTCG
TCTGGTACGAGAAGCCAACGTGCGGGGCAGACTGCATCGAGCTCCAGCTGCGTGCATCGG
AGCTGTGCTTCAACGTCGAGCTAGTCCCCGTCGGATTGGACGTCGCACTCCCCGAGAAGG
CACTGGACTGATTGGTGCTGTTGGTGCTACTGCCGGACAGAATAAGTCGGTACTCCTCCA
GCAATTCGGAGCTGTCGCACACCGACGCCTCCACGGAGGCGATGCACCCCGTGAGACCCA
ACGTCACATTATTCTTTTTTAGATACAGCTCAAAGTCGTTCAAGTCCACTGAGGCAAACA
GAAAGTCCTCCGTGTCATTCGGTCCACGATTCATGAAGTGAACCGTCGCCTTTCCTTCAA
TGAGGAGCGAAATATCGACAATGCGGTAGTCCTGCGCCTCATTACTGGCTTTAATAATAC
CCAGCTGGTACTCCAGTAAATCGTCGCACACTTCCTTCTCGTTTGCGCTTTCCTTCACGT
ACGGCACATACGCCTCGTAAGCGCTGGCGTAATCCTTCGTGGCTAGAATGAGGTTCACAA
TATCCATGATGGTCTCCATCAGCTCCATGAAAGGGGTGCCGAGGCAGAAGTGAACGCCAG
GTTTCGCCACCACGCCGACCGCGACTGGCTGTCCTTTCGGATTCGTCACCTCCACCTCTA
CGGACGGGGCAGAGAGAATGGGATGCTCCTTCGCGGTGTAATCCAACACGGTTGGGTGCT
CGAAATGGAGAACAATCTTCATAATGTTCTCCCTCTTCGCCAGGATGAACTCCAAGTGAG
CAAAGGAGAGGGAAGAAGCGGGGCGGCTGGGTCACGGTGAGGGTCCCCTCCCCTTCAAAC
ACATCCAAGCCGAGCTGCTCCACCAACAGCTCCAGACGCATGACGGGGTTTCCTCCGTCC
AAGGCGGAAATGCGGGCACTGTGTTCGCTGCGCTGCACCGCTGGCGGGGATCCAGTCGTG
GGGGAGACATGCGTCGCGTAGCCGGGGGCAGAATCCCCGCCGTCGTCGGCAGAGGAGTTC
CCTGGGCAGTCAGGGTACAATGGGCTGCTGTTTGATGCAAGCGGAACGGTCGGATTGAAC
CTCGCGGCGTCCTCTTCGGAATCGCGCAGGTAAGTTACCCATGCCTCTATCATATCGGTC
AAGAGGAACACCTGGTAGACGGAAAGCTGAAGCCGTAGCTTTGGCACGCGGAGGCGAACA
ATAACGGACTCACGGGTCAAGTTGGCGTCATCTATTTTCTGCAGAATATTTGCACTGACG
GACACTTCGGGGAGAATCATAAACCCGCTTTCGGGCTTTAGGAAGGCGTTCTCAACAGTG
GTCATTTCAATAAAGAAGCGGTCAAAGCTGGCCTTGTTACTGTAGTAAAGGTTTTCTTCC
TTCTCCTCCTTACTTTGGATTCTTCTTAGCTTTTCCTTTTCCGGCAACGGCTTCGTCTTG
AACTTGACGCAGCCCAGGGAGATGTACAAGGTCGTCTCTTTCGGGGTCGAGGTGATCGAC
TTGGGTAGCACGATAATAGGGGCGGACACGTCCACCGAAATAAAAATCCCCTTCACAGCC
GACATGGACTGTTTTATCTCCTGTGCCGCAGCCGACTGAACGGCGTTCGCCGCGCGTATG
GTGGAACTGGTGATGTGCGACATATCGACCCCTTTCGGGATTCGAAAGAAGAGTGCCACT
TTTTCAATCGTCGTGGGGTCTAGTACCACCCGCAGCGGAAACACCTTCACGCGAATGGCC
ACATCCAACTGGCAGTCCTCCAGCGGCTGCTCCACGGGATGAATGGCGCCTGCGATATCG
ATCAGTGGGGTGGCGTACCGCCGTCCTTCCTCATTGACCTCCGCGTCGGGGTCCAGGCCG
ACAATCTGACGCAGGGTCGGCGCCAGATCTGGGGGGACGCCTTGCACTGCCGTCAATCCC
TCCACCTCCACCGCCCCCTTCCGGCGGGTGACGGTGACGCCTTCCACGAGGTTTTGCAAA
TAGTGGTGGGAACTACTCGTACGACCCGTCATGTCCTCCCGTCCGGTGTTCCAGGGGTTA
CTGAGTGTGGCGTTCTGAACACAAAAGTGAAACTGCGCCGAGTTGGGCTGGTTGAAGGTT
CTCACCGCTAAGCGCACCTGATACAGCTTGAGCGAGGCATAACAGCCCTTTTCAATTTCC
ATCCCGCCGTACACCAAAGGCAACTCAAAGTTGCAGCGGAACCAACAGTACTCTTTAGGA
AGCCGGGTTGCTAGACTAAACTCCTTCCCGTCTGTCTCCCCTTCCAAGTCAGACGCCGAT
ATGCCATACTCTTTCTCAATTGCCAGCAATGTTTTGGTTTCCTCGTCTACGGCCTGTTCC
TCGGTGGTGGTGGTGGTCGCGCTCTTTCCACCTCTAAACCAGCCAAACCACCCGCCTCCT
CCTTCCTTCTTGGGAGCGGGGAGTTGTCTCGCTTTCTACGACGGCGGCTGCCGCCACATC
GTCGGTGTCCTTTCGTTTCGTTTTCAGTTCCTGTGCTAACTGCGCATACACCTGCCGCCG
GCACCACACCATGTCGGGAACCGTCATGAAGCGGCACGCAAACCGATAGGCCCTTTCTTT
GTCTGCATTGAACGGTACCTTGTGCACCACATCGCTGTATAACGCTTGATACTCTGGTTT
GAGCACCTCCGAAATCTTTGCAAGTAGCTTATCGCTTCTTTCTTTTGTCACTGCCTGTCG
CACAGCACGACCGACAAACCTCCACCACACTTTTGCATTACCCTTCACGGGAACTTTGGG
TCTGATCGCCGTCAGCGAGGACACCTCGGTCCAGTTGGTGAGGGTGGAGACCGTCTTCAC
CAGCGTGGTATACTGATCCCTCGTTAGGGAGGTGTTAATGGAGGCTAATTTGGCGTGCAG
ATCCACATACGGGGTATCCACCATTTCCTTAATGAACGACTTGAACACCATCGCCATATC
CACGGAGCCCGACACTGGCCCAAAGACGGTGGACTTTTCGACGCACCCGCCCCGCACTCG
TTGTCGCATCGCGTGGTACCACTCCCCCCAGTCTGATATGGCGGTACAATAGCAACGGCC
GAGTGCCTTGTTGGCGACTCGCTGCCGCTCATCGTCGCAGTAGATTTGGATCCCTTCAAA
TTCAAATCGTTTAAACATTTCCTTCTGTCCGGTGGGGTCGGTGAACTTGACCTCGCCGGT
CTTCCCGTCTACGGTGAGAAGATGCACGCCGCCGAGGATGGCCCCAATCACGGTATCCGC
GCCACTGTCTTCGTAACGAATGTGGACGGTGTCTATTTTTATAATGATATTGTTAATCAC
AATTTCCCCTAACCGAGAAATGAGGCCAGACTTTTTGTCCAGTCGCCTTTGACGCCTCTT
CCTCCTCCTTCTCCTTCGCCTCCTTTAGCGCACGGAGTTTCTTCCGCTCTAACTCGAAAG
AATCCAACTTCTTCTCCTTCTCCGATGCCGTATGATCCCACTTTGCGCTCTTTGACATGG
TGCTAGCGGAAGACGTACCACCGCACACGGTGAGCAGTACCTCCCCAATCTCCATCACCA
CCGGTTGGGAGTACAGTTTGTTATACGGTATCGTCAGCGACACATTCTTGCACAAACCGC
GATGAACACTAATGGGAAGCTGTGGGCCGTTGTTATGGTTTTCATCTTCTGGGGGGTTTA
AAAGGTCATTCAGGACCGATGGTTTTAGTATTAAATCATGTAAACTCGCCTTTCCGTTCC
ACAACGAGATGGACAACTGCTGTTCATCAATGTCCTCCACGTACTTGCTCAGATAGGGGA
CTAGAAGAGACGCGACTAGTTTTTCTAACATTGGTATAAATCGTCAATTTTAATTTAGTG
GAAACAATGACTTCAACGTACACACTATTGATTTATAACGATAGGTACAATATAGGAAAA
TATACAAAAAAAAAAAAAAACACGTTAACGAAGCTTAAGAAAAATAACAGGTACACTATA
CGCTAGTTGTCAATTATTATAAACACCTTTAAAAAAAAAAAAAGGGAGGACAGAGACGAG
AGGAGTGTTATCTGCACAACGCAAAAGAAATAGACACTTCAAGTGTTTGGTTATTATCAA
ATTCAACGGTGTAACAAAAATAAGGGAATCGTTTTAAGGGATTTTTTTTTTTTAAGATGG
TGTTTTGCGTTACACTCAAACAAAACAAAGTGTATGTAATGAGATAGTTATGCAACTTTT
TTTAAATGCCATTCCTCTTGATATCATCCTTCATCGCAGGAGACAGCAACGACTGGGACG
CCCGCTTCAACCACTCTTGAATGCCGCCGCCGCTCTTCTTTTCCTTACTCCTCTTCCCCA
CATCTGGGTGCCCAGGAGGAAGGTAGGCGGCGAGGTCGTAGGACCGGCCGGGCTCTAGTA
CCTTAAAGTTATCTCGGTTGATTTCACCGGTCAGGTCAAACGGTACTCGATTGGGTCCGT
AGTGTTTCAAATGACTGCGGAGTAAATCGCTAAATTCATCCACGTTGGCGACGCTGCCAA
TGTTCGCCTTACCACGTTCCGCGTTATCCTGGAAGGTCATGAGCATCGTCACTGGTGACG
TCATGCAGTGCACGAGCACCACCGTTCGGCCGGTGAAGCCCATTCGCCAGTTCTGCACCA
TATTGTACACGAACTGACCCTGCTGGTTGGGTAAGGCGATGGCGACACACCCGGCATTGC
TCATGGCGTTACGAACACTGTTAATGAACTCCAACCGGCCATACCTGGAGCTCAAATTGC
CGTTGCCGTCGATGGCGTCAATCATCACCAAGTCGTACCGCTTACTCGACGCCTCCTTCG
CCGTTCTCCCATCCGTGTCCTTGGTGAGCCCCTGCACCGCGACATGACGAATGTAGTCCT
CGGGGTCCCCAATCCACAACCTTAGATTACTACTCTCACGGAAGCCCAGATAGTTTCGAC
ACACCCGGGCCAGCGAGCCATCCCGCTCCACAACATCGACGTTGAAGTTGGGGAAGGCAC
TGCTCAGCCAACGCGGCAGGCCACCGCCGTGCAGGCCGACAATCAGGGTCTCTATTTGGG
GTTGCTTCACAAATGTGAGTCTCCACGGGGCCACCAGCTTGGCGGCATCACGTAGAATGT
GCACGGGCCCGAGGGTGAGGGCAAACTTCCGTGTTATCTCCTCCTCCACCTGTCCCGCAT
AGGGGACGCAATTGTTCTCCGACGTCACCGCCTTGCACTTCACAAGTCCATGCACAAACT
CCTCCCCTTTGCCCGGCACAAACTGCAGGTAGTTGTCATTGGAGGCGTAGTCGTCCGTGG
CCTCCGCGACAGAGGACGTCGCAGCCTTATCCTGTGCCAGTGGCTCATTCAGGTTGACGT
AATGCACACTACGGTAATAAATATCGTCCCGCATGGCTGGATCGTACTCGGGGAGCTCCA
GGCAGACAATATCCACCTCCCCGCTCTTACTCCGCAGCTCGCTTGGCTCCGTGTGGATCA
AATGAGGACGGTGCTGCACTTTTTCCTCCCCGCCGGCATCGCTGGTCTGAGGAGCGTATA
TCCCCTCGCTGTGCACCTCGCCCAGCGCGACCACGGTACTGGGGTCCGGCACCTCTCCTG
CGTCACGAGAGCCTAAGCCCCAAAACGTATTGTGCGCGGGGTCTAGCGGCACACGCGGGA
CGAGTTTGCGACGAGCCAGCTGCTCTCTTCGTGGTTCCAGATAGTTTTCCGTGACCCGGT
AGGCGAGGAGGGACCCTAGTCCACCAATGAAAAGGAGAATGTACGGCGACGTAATGCCCT
TGTCTAACTCATTAAAGAAAAACTTGGTGTACTTGTTCCGAAACGTCGTACTCCGCTTCT
GTCCCATCAAAAACGGACGGGGTGGCATATCGTCTATGGAAACTAAACCGAAAAGAAGAG
AAGTGGTATATGTATAAAGGGGATGAAACGAAATCGCTCTGCACGTTCGTCAAAAGTCAA
CTCATTGTTTTACCATAGTATGGGGAAGTTATATAATGATACAGTTTAGCAGAACAGTAC
AGAGTGTTGTTGTTTTGGAGTAACAATAATGATAGTATACAGGGAAAAAAAAAGGAATTG
AATGTTACAGTTGCAAGGATGTATGTTCATCCCATCAGCAAATGATCCAACGCATGCAGA
TAGTTTGGGTGCCGGTGGGCAAACGACAACCACTCCTCGAGCCCAACCTCGCCGTCACAA
TTGGTGTCTGCCAGTCGGATAACCTCCTCCAACGATAGACCCTCCAGACAGACCCCCTCG
CGGTGCGTCTGGTCTGTGTTTAGTAGCCTCGACTGCCCGAAAAGGACCCACCTTTCCTCC
GTCGCTTCGCAGTCATGGTGGAGTTTGGTGTGGAAAGAGAGGTCGGTGCTGCCGTGTCGC
CGACCCCACACTGGGCACCCGCACGGTCGGCGAAAGGTATTTAATGTCTGACTCACCTTC
GCGGAGGAGAGACTATTGAGGGAGGAAGACATTCTTCGGTTAACGCCGCGAGGGGCCTCG
CCGGAACCTCTTCGAATCTGTTTTTTAGTACTGGGATCCGCACCCCTCACCGGGCGGAAC
GAGGCGGTCTGTGCCGCCAATTCCGTACAGCGGTAAAGATCACTCAGACGAAAACAGGAA
CGCGACCCACTCAGCTTGGCAAACGTCTGTTCGACCCGCTGGACAAATTGCACCTCCTTT
GATATCTTCAGTACATCCGTGCTTTGCAAGGAATCTCTTCGCTGCGTGTTGCCAGTGGGT
GGTTTGGCGGTGGGAATGATCAGCGTGGAGTCCAGTGGGGTGAAATGGGGTAAAGGATTA
GTGCTCGCTGATAGAGACAATCGCCGATCTCGCCCTGTCTTCTCTGCGGGTGGTGACGGC
GTATCCGTCCTTCGGCAAGGCCAGTACACCACATCCGGGTCACGCAAGGCGGTCGTTTCC
TTTCTGCTCTCCCGCGACCACGAGCGGATCTCCCACGGCGGTGGGAGTACCGTCACAATA
GCGCTGGGCGGCACACCTCTGACAGGGGGCAACACAAATAGTTGGTCCGTGTGTACTAGT
TGCGCGGCACTACCAACCGGCTCCCACGTATAGTCCGTTAGCCCACACCGGTAGAGGCGG
TATCCTTCGAACGCCTTTAGCGATGGAGAGCGGGTGAACACAAAACAACACGCCCGCTTC
ACCTCATGGAGTGGCGGTCTCCCCGCAAAGGCAATGGCGGCGTTCTCCGACAACTCCGCC
GACGGGTCATACGGATCAAACTTGGTGAAACTTGTGACATACAGCACAAACGTCATTTCT
AGGCGTTCTTTGCGAACGATTATTATTGAAAGCTTCGCAGGAGGGAGAGTGGAGGGTACT
AGTGTACGACAGAAGGTCACGAGAAACAAAAACAAGTGCTCTATAAACAAAAGAATGAGA
AAAGTTCGGTTTCATTTCGTTAACGTTTCATTGTGAATATAAGTTTAGTAATAATAAATA
TATTGCAGCATAAAAATAAAACAAAAAAGAAACACTCCTCCTTGTATAGAAATAGGTGTG
GAGTTTGTCAAATAGGGTGATGGATTACTCGTCCAGGTCGTCTTCGTCGAACGGCATAAA
GCTTTCCTCACAGCCACAGCCATACTTTTGGTTCGGGTTCTTGAAGGTGAACTTTTCTTC
CACATTGCGCACGACATAATCCATTTCCGTGCCAATGACATAAAAGAGCGCGTCGGCGTC
TACCACCACTTTTACATTTTCCTGCTCCACCACGACATCCCTTTTCAAACCAGGCAGCAT
CGCCTTCGACTTCCCTGCTGCTGGGGCTGCCTCCTTCTTCTTCTCCTGGTCGTAGTGGTA
GTTGACCGTATAGCTATACCCACTGCACCCACGACGGCGGACGCCGATACGAATGCCAGA
TGGGATCGAGGACTTACCACCCTCCTCCACCTCTTTCGCGTGGTTCTGTTCGTACTGGGA
GATGAGATACTTCACGCGGCGGAGCGCCTGAGGCGTGAGCACAAAGGCCGCCTTGTTCTG
AAATAGCAGTTGGCGCTTCTGAAGTGGTGAAAGGGCACGTTCCGGGACCGGTCCGGCGTC
CTCCGAGCACGACGACCGCGCCCCGAAGAGCTCCTCTGCCCTCTTCTCCGCGCGGGTGCG
CTTGCCGTTCAGCCCTTTTGGCTTCTCTATCTTGGGCATCGGAACCTCTCCACTACCCTT
GTGCGCCGACTTGTATAATTGTTGCAGTGGGTTAGAGGCGGTGGACGCCTCCTCTGCGGA
GGACTTGTACCTACGAGTATAAGAGCTGGCGGCAACACTGGTGAGTGTCCCGAAAGAAGA
AAACAAACGTCTCATTCAATCCTATGCGATGTAAAGAATAATAAAAGATCACTTTGAAGA
AGAGAAAACAGATGGGCAAGACGTAAACGAAGCAACCGCAGAAATAATATCTCCTCTCAA
AATGTAAACAAGAAAAAAAGAAAATAGTTATGTTACACGTACGACAAAGAATTATCGTGG
ATTATACGAAATTTTAACAGGTATTCCTCAAGCGTCATAGGTCATGTATTGCTCTTCCAT
TACACTTTCCTCAATGTGGAGGGCGATACTAAGGAGCAGTTGGGTAGCGTCCTTGGATGC
CTCCAGTGCCATCGATGCGCAAGCTGGACTGGCAGAGCCGCTGGAATCGGCTGCACCCGT
CACAGTACTGTAGTCTTCCCTAATGATATCTTGCATCATGAGGGAGTGTCCATCCGAGGC
CGAAAACTCAAAGTTATTTCGCAGCTCCATCCACGCCATCACCCGAATTAGTTGAGACGG
AGACGAGATGGCCGTTCGCACATTATTGGGGAAGAGTGAGACCACCCGGGACGTCACCCG
CTCCGCTAAATCCCTCAGGCCACTGGAGGGGCCCAGCACACCAATGCTGCAACTATCGTA
GCAGTCCTCGTCTACCAAACTCTCCTTCTCGTGCAGCACCAGACCGGTTGTTCCGTTCCG
CCACGCAATAGCAAAGGCAATGGTGATGAGATCAATATTAGCGATCCGATCCACAATAGA
AGAGGGAAGCGTGTCGCCATAGTCGCAGTAGGCGGCAGAGGACGCCGCCGTGTCATCGGC
TCTCGTGTTCTGTATGTGCCTTGTGTAAAACGTCTCCACCAAATCATCCAACCATGTGTG
GTGCACCGACTGCGGCGGGTACACGCCGTCCGTGTCGGCAAGCGGGGAAAACGTATAACT
AAAACAGCGCTGCAGACCGTCGGACCAGTCCCCGTAACTCACCTCCAACAGGTGACGATA
CTCCCTCGTAAAGACCCGTTCCTTTTTAAGTTGCTCCACGGTTTCCCCCATCTTTTTCAA
ATGTTGCACGTACAGTTCCTTATTCCGCTGTAGGGAGCCCTCTTCCTCGTCGGATGTAAA
AGGGATACCTCTCATGTTATCCTCGTCCAGCAAACCCTCTTGGTGTGACCACCACATGCC
CCACAGCACTCGCCGGTGATGATCGTCCCACAGGCACGGCAACAGCTGCCACAGCCGCTT
CGTATCGAGGGAGGCATTCACACTCTCCACCAGCTCCGCCCCCTCCACACCGTCACGCCC
ACGCTTCCCATTCGTCTCCTCCTTTCCGATGCTCTTTAACTTTTCCACGAACAGCTCGCT
CGAGGGCAGCAGAAAGGGACGAAGGATAAACCCGTACCACATGAGTAACTCCATATCAGA
GTAACTGCCGTAGTGGATTAAGAGCTGTTCGCCCGGGCGAGTCAGACCTATCGTCGTGAA
TCGGTACTCGTACTGGTGCTCCGAAAGGCGCACCAAACCTCCATTACCGCTACGGGACGA
CGCATTCAGTTTCATGGTGCTATTGGGATTCAGCGCATAGTTAAAGTAGTCCACGTATGG
AATCATCACCCACACATCCGTGTGGTAGGCAAATCCTCGACTGAGCAACGAGTTGAAGGC
CCAACAGAACATTTGGAGAGTGCACCCACTACTGACAGACGGCCCGCCGTTGCCCGCCGA
TTCCTCGTCCGTGTCCACTGACGTGAGGGGACGCGTCAGACACTTCAACTGTTCGCAGCA
GTACACAAACCGTCTTTCCATTTCCTTCTGCTCCAAGCGCACTTTTCTTTGGTGTCGCTT
AAACAGCAAGAAGGCGTCCGAAAAGGAGGACCCCTGGTTTGTGGTTTTCTCACATTGGGT
CGCCACCTCGCTGGTATTTCTCTGGTAAAACTGTGTTTCATTTAACTCGAGCAAATTGTC
ATACTGTACTGGCAAGTGACGTATCCACGTGGGCATCCACTTATTTTCGTGACAGAAACG
TATCTGCACCGGTGACTCCGACGTGGATGCAGCCGGGGGCCACCTACCATACAGTAAACC
AAGCATCAATAGATAGCACGTAATGGTGTTCGTGGGATCCAGCCGCCGCTTCAACTCGGC
CTCTTTCGCCGCCACCGCCTGTGTAAAGTTTTCCGTGTCCTCCCCCTCTTCTACGTAATC
GCCCAGTCCATTTGCGGTGAGGGTGACGCACGCCGGTCCCTTCTTTCCCTCTCCGAGAAA
GTCAATCTGTGTCTCCACGAGCGCCAAGTTACGTCGTGCCTTCTGGGCAGTAATCATGGA
CCGATACGGCAGTACAGCGAGACTAGTGCTGGGTGGTAAGTACGCTTGAGGGGCAGAGGT
GCTGCCGTCGTTCACGGGCTGGTAACACAGTCCCATACCCCCACCCATAGAGGCTAGTGC
CGCGGCTTTCATGGTAGGGAGAAACGTAGCACCCTCCGCCTCCAGCAGTTGCCGTAACGT
GTTCGCCACACCCACAGACATTCTAATATTTTTTGTTAGTTGATTGTATAAGCTATGAAA
AGAAACGAGATGAGGAAAAGCAAAATCGCACGCAGTTTCTCTTTCAAGGGCAGTAATCAA
ACTCATTTGGGAAAACACCTGTCATCAAATCAGGACAACTCCGTCTGTATACGCACAAAC
AACCATGAAAATGAGAATATAAATTGAATGTTACACAAACGCCCCAATCTTTCAACATTT
TCCCATTGAAAAGATTGATTGCTTCACCTCCAATTGCACAGTGGAAGACTGAATCTCACT
GCAGACGGCGTCCCCCGCTAACTGGGCACGCTTCACATACGATAGACCGCTGCCTTCCTC
CCCCGATTTGTACTCCTGCCCGGCGTCATCCGTCTCACTTTTGTTGATGCGTGCCACGAC
AGCGTCCCTATACAGGGGTGAGAAGGACCCACCACACGCGTACACGTCATCGGTGGTCAC
CACGTTGCCTTCCCTGGTGTAGGTTTCCTCTTCCCTATTGGAGAGGTGGATTGGGGTGGG
GAAATTATCCTTATTGCTCTGGCGTTTGCCGCGGCGGTTCGTCTGGTATGCCTGTTTTGT
GAGATGCGCGGTTAGCTCAAGTTGTCCCGTGTTAAAATTACGGTTGGCAAGCAGTGGATT
GGCCGTGAAGGCGACACTCCAGTACTGGTGAAACAGGGCGTCTAGTTGAACTTCATCCGC
GGCGCTTCGGACAATGGTGATGGGAAGCTCATAATAGCAGTTGGCGTACATGCCAAACTC
CTTGATGCGCTTCGACGGCATATCGGGCACCGTCTCCGGCCTCTCGTTTCCTCGTTTCAT
TTCATTGGTGGGAAAGGTGCGGAACGCCTTAAAGTCTAACTGGCCGGTGGCGATGGTGCG
GACGGGGTCCACCACAATGGAGAGCCACGGATCGCGGAAGGCCTGCCCCTCCCGCTGTGT
GTTCACATCAATACCAGAGAGGAAGCAGGTGTAGCCCGGGTGAGAGTGGTACCACCCAAT
GCAGCCAGCGTCCGGCTTCCCCAAGTTGCGGTGGTAGTTGAGATAGGTGGCCTGATAAAT
AAGACTTCGGTCATCCATGCTGCACTCCACCTCACTCGCCTCCACTGGAAGGGAAAAGCT
ATCCGTCACAATGAGGGTATTGTTGTAGAAGTGGCCGGTCATCAGGCCCATCACCTCGTA
CCAGTCCGCCCTGCCTTTCAGACGGTCTGGGCTTCCCGTCTTGGTGTGAATAAACATTTT
GAGCGCCGCCAGCGCCGTCACCTTTACCTCAGTGAAGTACTTCATCTCCTCCTTCCATGG
TTTCTGTTCTCTCTTTTCTCGCATGTGCTTTACGTCCGGGGCAAAAAAGCAATCGGATGT
GAATTCCTTAATGTTGTTCTGTAGCAGCCACGCCTCCTTTGCCTGTGAGCTGGGCTCCAC
CTTATCGGAAGTCCCTGTCTTTGGCTGCTCCTTTGCCACCTGGACCTTCTTCAATAAGCT
CATGACTATCCTTGGAAGAGCGGGGGGGAAAGAACGGAGTAGAAGTGCCATGTAATTCTT
GTCAGACGCAGTAGTTAGGTGTCCCTTTTACTTTTCGATGGTTTCATTTAATTACTTTTT
TCGTTTTATATTATTATCATTATCGTAGTTAATCGAAAGAAAACACAAAGTGCCGGTCAT
CGCGGTTACCTGCCTAAGAGTGCCATCTGCTCATCGGTGAGTTCCGTTGACTGGATGCCG
AACAGGCGTACGGGGTAGACGGTCGCCTCCTCCGCCGCTAGTGGGGTTTGGCCGTCCTTG
GTGTAGGCCCGCACAATTAAGCAATCTACCGCACCGCCAGAGTTGAACACAAAAGGCTGT
TTGAGCGCCACCGTGTGCTGCGCCACCTCGCCGTTGAACATGCAGCTGGAGAGAGTAATC
TCCTTTCCACCGGTGAGCTTGGCGACTAGACAGACCCGCACGGGGATTCTTCGCTTAGAG
GGGGCAGCAGCGACCTTTGCATCGGTCTCCGCCTCCTCCACTGTCCCGACACTTCGCTCG
TCGCTAAATAGTATGGTGGTCACGATGGCCGAGAACGCAATGTTCATTTGACTGTTGGAG
GATAGTAAGAAATCCTCATTGGGCACCACGGTGAGGGTGAAGGAGGAATCTACAAATGGC
ATCGCTATAAGGGGGACTGTAGACGGTGAAAAAGAGGGAGCAAAGGTGTGGGGCGGTGGA
TTATGCCGCGTTAAAAAAAAAAAAAAATGGGCGTTCAGTTAACCACCGTGAAATACAAGC
AAAAAAAAATAGGACAGTTTACAGCTGAAATGTTCGACCACACCAACTGGCAGTGCTGGT
GTGGGGTCTGTACACAGAAGAGTGCACGTGTGCGACCGCCTGCCACCGCTCCTGTGCGGC
TGGGTTGAGCCACGCATCCTTCGTCCCCTCCAGCGGAAGGCGGTCCGACGGCCTAGCCTC
CTGCCGCTGCATGCTGGACGTGGTGGGATCGGCAAAGTGCGACGTGGACTTGACGTAGAC
CTCGTCGTCACCCGTCGCGAGGTAGGGGACCGCTTCTTTAGGTTTACGCTGTTCATAGCG
TTCCTTTGCCGCAAGGATATCGGCCTCCCTCCGCTTCGCCAAGGCGTGCCGTGCCTCGAG
CTGCTGACGACTGAGTCGTGCGCCAGATTGCTCTCTATCTGCCGATGGTGCCTGTTTGCG
CTGTTTGTACGCCTCCAGCTCTTGTCGCTTCCGCTCTCTCTCCTCTTGTTTTCGTTTTTC
TGCGAGTTGTGTCGCTCGCTGCTGCTTTTCCGCCAACTCTCTCTGGCGCTCGGCAGCGGC
AGCCGCCTCCTGTTGTTTCTTTTCTTTCCACAGCTGCACTTTCTGCTTCAAAAACATTTG
ACGGCTTTGTCGTGCTACTTCCAGTCGTTGGTGTTCGTCCTCCTGTACACGGGAAGCGTA
GACTGCTCTCTGTTGGGAGAGCACCTTGCGATGCGCCTCCTCGGCGGTCTGTTCCGCCTG
GCAGAACTCCAAGAGGATCGCCCGTTCTTGCATTAAGGACAGATAGCGGCAATACAGCTG
AATGTGCCGGTCTACCTCGGCGGTCCCAATGCTGCCCCCCAGTGTCGCGAGGCACGCCTC
TCGCAGTTCCACCTGGCGGGGTAGTTCAATGTATTGCTGAAACTCTCCATAACGAATTTG
CGTGCCGCCGGCCGTCTCATTCACCTGCTGCACCACCCGCAGAAAGCGGTCGTGCAACTC
GGAGGGCCACCCGAGGTGCTGTCCATACTCACCCAAAAGCGCCAAATAGGCGTAGTTGGT
TTCCTCGTACCGCCGTCGGATGTCGCCGGCGCTAACGGTGGGGACAAAAGAGGGCTGATG
TTGTCCTGTAGCGGAGTTCGAGCTGGTCAGAGGGACAGCTGGGCGTATCTCGCATCGCCG
CGCCACCGATAAGCCGCCGTCCGCCCCAATCTCCTCCGTCAGCGCTTGTTCCTCCCCCTG
CAGGTACACCAACTGCTCCGATATCAGTGCCCGGACATCTGTGATAAACCGTCTCACCTC
CGGCGGCGGGATGCGTTTCTTTTTGGCTAGCTTTACCGCCTCTGCCACTTTCCCCACATC
TGTGCGGCACTGGATGGAGAGTTGGGCCCGCCGCCTCCCCATGTCACGATGTTCATTGAG
GGCCAACGTTTGCACAAAGTTTTCCTCCGACTCCGCATCGTCCACCCCTCTCCCGTACGC
GACGGGACGTAGTAGGAATTCGGACAAGCCGGTCTCACACACCTGTTGGGTCTCATTTAA
CGTTTCGCGCTCGTGAAGAAACGTGTGTCGCATGCCACGTTCCGCAAACATGATGAAGTA
GACGACAGCTGGAAGAATATCTATAAAGGTGCAAGCAGCAGCGATAACTGATACTTACCC
CAAGGAAATAAAGAATCTATATGTATGTTTTTCTTGTAAAGCTTTAGAGGGAAGGCAAGC
AATGTATTATACATTTTTCATACGTTTAATACATGAAAATGACTTTGCTGCATAAGATCG
AGAATGTCTTTTTTTCTTTTTTTTTTTCTTTTTAAGGTGCGGATGAATGGCAAAATCAAC
AAATGATACACGCTGCGTAAATGACGGTGGCAAAAAGAAGCTTATCTTCACGGTCTGGGG
TATAATTTTTTTTTAAAAGAAAAAGCGAATCGTGGGTAACACACAAAGGCGCGCACTACG
GTGAGAGAAGAGCCGCGGTCATTATTTCAATGACACGACCTTCCACATCGGTGGCGGTTG
GGCGCGTCGTGGGGTTGTGTGAGAGGAGGTCCACGACTAGCTCCGTCAACTCACGGGAGT
AGCCACGTCGCCGGATGCTCTCCCGCACGCAATCGCCCAACGACATCTTGGTCAGCGACG
CCCGCTTGCTCAGTCTGCGTGAGCTAACGGAGGCACCAGCGTTGGTGAGGTTGATGAACC
GGTCAATGGCCGCTAAATCATCCGGGGTAGCCCAATTCTCGGAGTTGAACATTTCAAAGT
CGTTGGTGTTGGGGTTGAGGATCATACCCGGGTAGTCGGGCAGCACCATCAGCACGTGCA
GCAAGACCCCTAGACTCCACATATCAGAGGCCGGCATGAGACGTTCTTTATTCATGGTCT
CTGGGGCCATGTAGGCCGCCGTCCCCACATTGGACTCCACCACGTTGCGGTGACTACGGA
CCTCTCGGCTGGCATCGAGGTCCATCAGCACGATTTGTGCCTTATTATTGTACATCATAA
CATTTTCCATTTTGATATCCCCGTGCACGATAGGGGGGTTGCGCTCGTGGAGGAATGAGA
TCGCCTGAGAGAGCTGCAGCGCGATGGAGCAAACGTGTTCCTCGGGGAAACACTTGCCAG
TAAATCGCTTAATCTCCTCCGCCAAGTCTCCCTCCTGATAGAAGGGCATAAACAGCTTCA
GCTGCCGCTGGTTCGGCGACAGGCTCACTGCGAGGTATTCTACTAAGTGGGCGTGACACA
TGCCCGTCAAAAAACGCACCGACTGTTGGTAATTCTCCAACGCCTCCGTGCTATCCTTGA
AGGTGAGTGTCTTGACCACCACCTTTGTGAGCGGTTTACCAAAGTGCTCGCTCATGATCA
CCTCTCCGTCACTCGTGGGCTGCTCCACCTGGTACAGATCCACCACACCCTGGGCACCCT
CACCTAGACGTTTCGCGTCGTACACCCGCTGAATCAACAGGGTATCCCCACAGGCGGTTC
CCAAGTCACTGTCGTCCGTGAAAACGCCATACACCTTTCCTAAACCCTTCTTGTGGGTAT
TGGTGTGCTCCTTAATCTCATTGCGCAGGAGCACAAAGCCGCAGTGGCGACACTGAAGGG
CCATCGCCCTATGAATCGTGTTAATGGCAGAGAGTGGAATACGACTGGCGAACTTCTCCG
CCCTATTTTGCCAAATAATCTGCGTATCATCGTCCGAGTAGCCTAGGACGGTCCCAAACA
AGGTAGGGTAGAGCACGTTGCGATCGGGTCCCTTCAGCACCACGGCAATAAAGCGATTCT
TTCGCTCCGCCATCACCTCCACTGGTGGCTTTCCGCTCGCAAAGTACACCAGACGGCGGC
CCGTCTGCAGGTTCACTGGTTCGCTCGCCTGCTGCAGGGGTAGGCCCGTCTCGGACGGCA
CTGGCCGCATCACCTCATTGGGTGGGGATAGATCGCACGGCCGCTGATTAGGGCCAGAAA
AGAGATTGTCGATCAAGTCCCTCGCGCGGTAGGGGGATGGTCTGTCATTGTAGAAGGAAG
ACATGTCCCCATGTTGGCTGTAGTCAAAAAAACTCATCTACTTCGCCTAAAATATGATGA
CTTTTACACGGGGGAAAAAAAAAAAAGCTAACAAATGGAGCTTTGACAAAAACAAAAATC
AATTATATTGGAAAAGTTCTTTTGACCTAAACTAAAAGAACCTTGAAAACGACAGACAGA
AAAAAGAGAGATAAGTATAGTTAGCGTCACTCGGAAAAAATGATACCATACCAGCACACT
TCTCTTACCAAACCCAAAAAACACGTTTTCTTATCATCTTATTTTTATTAATCGAAAATT
TTATATTTTGTTAATTTTTTCATTACGGTTGTTATTTTTTTTTTTAGAATAAAAAGAAAT
GTCAGATCAGTTTACACGGATAATAGAAGAACGACATTGTTTCTGATTAGTCGTCGTCGC
TGTTCACGGCGCGCTCGTCCCCATACAAGTCTTCCGTCGTAAGCGTGTAGTTCTTCTTTC
GCTTCGTATCACGGGTGTTCTTCTTCTTGGTGGGCTGCTTCTCCTCCTTGCGCATCTGCT
TCAGCAGCTGCTTCTCATCCACCTTCTCATCCGTCTCCTTCGCCTTCTTCTTGCGCTCCT
TGATCTTCTCCATCAGCCGCGCCCGCTGTTCGCCTCGCCGCTCCTCCTTCATGGCGGTCC
GCATCTCCTTCACAAAGTTGCGCGTCTCCGCGACTTCCCCTAATTCGTTCTTGACCCGAC
GGCGCAGATCCCGCTCCGTGAGCTCCTCGAACTCGTCGGGGCGTAGGACCTGTTGCATCA
CCTGCATCGCCTCTGAGAACATCACCCGGACAGACCGCACGGTGCCTAACGAGACGGAAT
ACTCCCTACAAATCTCTATTAAACTACCCACTATTTCATTCACCTGCTCCGCCGCCATCC
GCTCCGCCAAGGCCGCATCGACGGGTGTTTTCCTGGACGGGGTGGTGGCCCCTTTCCCTC
GCGGGGCAATGGTCGCCTTGGCGCGCTTCATGGAGAGGGTGATCTGCTCCTTTCTCGTCT
CTAGCAACACCCCACCAACGATAGGGGGGAAGAAGAAATCTAGCACTCGCTTCTCCACAT
AGTTACCTTGGCTCATCGCGAAAAGCGGTACACCAGCGGAGATGGCCACAAAGAGGGTGG
GGGTCAGGAAGGCCTTGTTGATCTCATCGAACGCCACATCGCACAAGTGCATGGAGAGAC
CGACGGAGTTCTTGTTCGGGAAAATGTACTCTTGAAACACAAAGAAGAGTTCGGAGAGGG
TCTGGTGAAGGGAAGGATTCGACTCCTGATACGCCTCTGTAATGAAGCGGAGTGAAATGT
CCATTGCCACCTTCTCCACAGACCGCGCCGGGTCTTTCTGTCCTCTAGCACGCTTCTTAC
CCTTCGCCGCGGCTGGCGCTGCCTTCGTCCTGGTCGCCTTGGTCTTGCCAGCCGCCGCAG
AGGAGGACTTCTTGCTAGGAGCGGGGGAGGGCGCCTTCTCCTCTCCCACCTCCCTCATCA
GCTTGACCCACGCCGCCCACATCTTTCGCACCAGGGCGAGATACTTGTCCAGGCGGTAAC
GGTCAATCGTTGGCCACTCGCGGGACAGCACACGGAAGAGACAGGCGTAAAACAGCATTT
TGGTGCGGCGGGTGGGAACAGCCAAGAGAAGGTCGGCGATCTGCTGGGCACAGGCTAGCT
GGACGAGTGGCTTGTCGGAGTGCCACAAGCAAAAGTGCAACCCCCTGCATAGCTTGAGGT
ACACCAGCTCTAAGTCACACCACGCGCGCATGTAGTAGTGATACCGCTCCCGGTGAAGGG
CGAGCGGACTATCCGGGGAGGCGTGCACCTCCTCCTCCTCCTCTTCCTCCTCTTCGTCGT
CGGAGGGCTGCTCCACCCCGAACTTTCCAGCCATCTCTTTTTCTCGCTTCTCCTCCCTCT
TTTTCTTCTTGTACTCCTTCAACGACTCCCGGCGTCGCTTCCTCTGCTCCTGGGCAAACT
CCTTCTCCCGGAAAACCTTCAAGGCGCGCATAATGTTGTCGTAGTGATACGGCGTCGGCT
TATTTTTGCCGCGGAAGTACTGCAGCACCTCATCGGCCTCCTTTTCGTATTCGGTCTCCA
TCTTGGCTACTGCCGCCGTCACCGCCGCAATGTACTTGGGGAGCTCTGCCAGACACGCAT
CACGCACGACCACCTCATTGTGGGCCAGCCGTCTGCAGAGCAGCTCTACGCGCGTCAGCT
CATCCTCGAGGTTGAGGTGGCCACCGGGCACGCCGTCTTCCGTGACGGTAGGGTCGGGGT
AGTTAATCGGCAGCTGCGCCAACCGCTTTCGCAAGTCCTTCTTTTTAATCTTCATCTTGG
ACGATGAGGGTTACTAGGCTAGTGTGCCCTTTTTTTGGTTTCTACGGTAAAAATATAAAA
CAGAGAGTGTGGATGAAGTCTTCAACAAATTTACTAGGCTGTGCAAAAACAACAAAAAAA
GTAACACTTCGTGAAATAAAAACCACAATATAGTATTGAAGTAGCGGGAACACGTCCATC
TGTATAGGTTTACTTTTTACTCAGAGTGGATGTTGACGTTTTTTTGCGGTTGTCCGCTAC
ACCTGAAACCCTCCGTCACCCATGACAAACTCCTCCGACTCCCTAGCGTGCTGCCGCTCC
TTTTCCAGCATGACGCATCGATTCTCCGCGTCGAACAGTCTTCGGAGTAGTTCACTATCT
TTTGCATACGCCGAAACAGTTTCGTTGGTACTCAGAACGGTGTTCTGCTGCGCCGTCTGA
TGGAGACGCTGCGCCTGAACAATGGTCCGGTTCATTTCCCCTAGCAGCGAGCACCAACTC
TCCCACTCCGCGATCTGCTGTCGGAGGCGGGCCTTTTCCTCCTCGTCCTCCAAGTAGTAC
CGCTGCTGCACAGCCGATTGTGACGCCTGGTACGCACGAGCCTGTTTTAACTGCATTTTC
AACGTTTCCAGCTTCTTTTTTTGCTGCGTTTCCTTTTCGGTGGCGTCGTTCGTCGGTGTT
TTCGTCGCATTAACCGTCCCCCCCTTGGTACGCACTGGAGGATTGCTATCCACATTGGCT
GGGACCTCCGGTGTGGTGAGGGGCTTCCCCACCACATTCAGATATTTCCTCCTCGGAGTG
ACCCGGTAGTGGGAGCCCACTCGCAGGGACGGATAGTGCACGGTGTCCCGTGCGTCCATG
GTATTACTATAGTCCGTCAGCGGTCTGCTGTGCGGCTTCAGTGTACTGTTCAAGTTGGGA
TTCATTGTTACGCCGACGCGAGTCGTGGAGACAGGGGGGCATGTGGACGAGAAGGCCGCT
TTTTCATTGCGGTAACTCATCTAGGAAAGAGGGGCGCTGTAGGAAAAGGGTGTGGGAGAG
ACCAATGGTGGCACAAAAAAAGTGTGTGTAGCCTGCGAAAACGAGGCGATGATGTATCAT
TTTATTTCTCTTTCGACACGGCACGAATATACAATAAACACATATAATTTTTATTTTTTG
AATGTCACCGCTTTGCCGACTTTACAATGGTCTGCTCGAGCTCCCGAATACGTTTGTTGA
CTTCGGCGCTGTTTGTGGCATTGGAGCAGTAGCTGTAATAAAAGCCGTAACCCTGAGGAT
GAATCCGATTTTTAGAGGCAAAAATAACGAAATTGGTGAAATTCAGTTGTTCCCCCGCCG
CGAACGGCGCGTCCGGTCCCTGCGTTAAACTGCTCTCGTGCACGTGAAACCCAAAAAACT
CCAACAACGGTTTACCGGTGGTGAAGTGATCGACGGAGAGGAACTTCTCCGTCAGCTCGT
AGGCGGTCGCCTCCACTGAAAAGAAGGTACGTTGGTAGGCTTGTTCGTACGTCTCCCGAA
TGTATCGGCCAGCGTTGGTCAGTTGGGCGCCGCCCTGCACAAACATGGCGGAAAGACTCT
GTCGCGCCTCCTTCTCCATCGTACCCCAGACGAGCAGTAGGTCAAACATGTAGTAGTACT
CAAAGTAAAGGTAAATGTAACTGACGAACGCTTTCAGCTCCGCCGGCTCCAGCACCCGTT
CCCCAGTCCGGGAGGCGATACGCTCGATAACGGTGCGGTTCGACGACAGGTTGTACTCTG
GTAGTGTCACCAGCTCCTTGGTCATCACGAAGGATCGCCAGAGCAGCGCGACCACGTTCT
CCTCCTTGCGTCTAAACCGGGACAGCAGAAAGCAGTTGTTTTCACTTTCCCTATCCACGT
GGAGACTCTGCCGTCGCTGTCGCATCACACGACCCTCCAGGTTGGACACCATCACATAAC
CCTTTTCCTCCGCATCCAGAAAGTGAAACAGGATCTGTCGCCGCTCCCGCTGACTGGCAC
TCCGCCCGCGGGGGAGCAGCAGGGCCAGCGGAGACCACGGCCACGCGCTGTTCGCCATCC
GCTGCACCTCACTTTCCTCCATGGTGTCGAGGTGGTCGTCCTCCTCCACCTCCAGCACCG
CCAGGTCCACCGCCCGCTCCGATACGTCCCTGGTCTCCCCTACGAAGAGGGCGGCCGCCG
CCTGAGCGAAGGGCAGATAGAGCGCCTGCCGATTGCCGCCTGCCCCACCAGCCTGTTGGA
GGACACCGGTGTAGAGCGTCAGAAGACGATCTCGTAGGCCATTGTAATTGGAACGAAGCA
TATCTTTCAAGATCAAGTCCTTGTTGGCACCAGTGGATAGCGCTTCCTCTAGAATGGTAG
AAAAGTTTTGGCGCAGCTTCGTCATACTTTCCTCACTGAGGCCGCCGGAGGACAAACTCG
CTAAAAGTTCCTCGTTCTTACCACAGCAGGTGACCAAAAGGTTGACCAGATTCATATACT
CGAACAAGTACCGCGCATCGGTCCAGTGGACGTACGCCTCGCCACCGTCGTCGCCTGCCT
CGTTCAAGTCCCCACGGCCAATGACGGTGTTGGTCTCCTTCACACACTTGGTTAACCACA
GCTCGAACAGGTAGTTTTCGTACGACATGACACCCTCTTTATTACCGAGCGCCAGCATCG
CACGACGATAACTGGCGTAGCCCTCCTTACTGGACTCTCGAAACGATGCAAACGCTTTGT
TTTCGGTCAATAGTATTTTCGTAAAGTTACTCCATATTGGATAGTTACCGCACACATAGT
CGAACAGCTTCGAGTTGCGGAATGCCGCACTCCCAACGTCTCTCTGAGAGAGTGCGTTCG
TGCCGATGAGCCCAAACAGACCCATGGGGCACTTTCGGAAGTCTGAACTGGGGTCCAACT
CAGTCATACCGCCTCGCTCGTTCTCCTGGTCGATAGCGAAGAGTAGTAGTTCGTCTCGGT
TGCTGCCGCTGCCGTCAGACGGAAGGGAGAGTTGTGTCTCGTACTGTAACTGAAGATTAG
CATTGCCGTCCCCAATCTCCCGTCGCAGGGCTGGGTTCGCGCTGGCGTGGAGTAGCGAGG
TGGGGCAGTTCTTGACCGAGCGAGGGGCCACCACTGGCAGTGGCGCTATCCCCCTCTCAC
TGTACAGCTGTGCCGCCAGCTGCTGACCCACAGTGACGGCCACTGGATAGAAGGCAGTTT
CTTTTAAATTGTTTTCATCTAGATTTGCTGCCGCCCCATGTCGTGCCTGCACCTCTTCCC
GTATACCACCCTCATTATCGCGGTACAGACCGTGCAGGTGTGTGTAGACACTGTAGTAAT
CCAAAAAATCTTCAAACGAGTTGATGCAGGGCTCCTTAAAGTGGTCCTTTTTGCAGTTCA
CCACACTTTGATAGCTTGTGTCGGACAGTACTCGGTGCGCCGCCGCCTTCTCTTCCGGTG
TGCCCTCTAGCGCATCCTCAATATGGAGCAACTGGTAGACCTGTTCGCCTAAAGTAGCAC
TCGACACGGCGGGGTTACCGTTGTTACCGTCTAAAATGGTTTGCCACACTTTTTGAAGGT
GTTCATAGTTGTTGTGGATGTTTTCCAAATGGTGCTGGTTCGTTTTACTCGGTGCCAGGT
CGTACAGATCACTGTCGTCCATGGGGAGAGTGGGGACAAAGTTCTCGCCGGGTTTCGGCG
GGCGGTTTGTCTTGCCCTGCGACTTATGCCCAGAGGAATCTGCCACATTGGATCGTTGTG
CCCCACACGCGCAGCCCATCACTACGTATCAACCAATAGATGAATAAATTAGGCAAGTGG
TGCGGTGCGATATTCCTTTGTTTGCTATAATAGGAGAGAGAAGGAGAACACGGGGTGTAC
TGGCAGGTCTAGCTTCAAGCAACAGTTCAAATCAACAAAAATAAACTTACTGTTTTCAAC
AGGATAAACACATATGGGAAGAAGAAAACAATAAAAAAATCTACATTTCATTTTCTTTGT
ATTTTAGTTTGTTTATTCATTAAAAAAAAAAAAAAGTTTTTCGCGTTAGCAAGAGTGAGT
ACGGGAAATTAACATATGCAAGTCGTTCTGATTGGATGAAAAAAAAAAATCTACATGAAG
AACGTTTGGATTGACATGTGTTTCGTACATTTCTTTTTCTCATTCTCCGCGCTTAACAAC
CGTGTAAAAAAAAAAAAAAATTTGAAATTGAACAAAACACTAAATGAAAACAATGGAAGG
ATATACAGAAAAAGGGGGAATAATCATTTTACAGTATTACTTTTATCGTCACAACTCTAC
ATTTTTCAAATTAATGAAAAAAAAAAAAATGGGTATAGTCTTCCAACGGTAAACAGCACT
TGTTTTACCGTGGTATTGTGTTGAACACCCTTCTTGATCAGCAATGCGGTTCATAAAAAA
TGCGAAACCCATGGCACCACAAATTACTGCTGGTTTTCCTTTCCGTCGGCGTCTAACTTC
TTCTCTGCCGCCCAGCGAGCGAACTCGTCAAACGTCATCTTGCCACTGCCGTTGTTATCA
ATCGAGTCAAACACGGCGTCGGGGTTGGTAATCTTGAGACCCCACTCCTCAATCTTGGGC
ACGGCGGCACGGAATTCCTCCTTGTCGACCATCATATCACCAGAAGAGTCCATCTCGTCG
AACATGACGGTGAGTTCAAAGTAGTCGTAGATGTAGCAGAGGTACAGGCGGAACTCGAGG
AACTCCACCTTGTCGGCATCGCCAGCGCCTTCCACCTTGTTGCCCATGGTGCTGGCCTTG
GTGAACGCGCGCTTGTTGATGTCACGCACCATCGGGGTGAAGTCATCGAGGTTGAGGATG
TTCATGCAACCATTGTAGCACTCCTCCATGGTGAGGGACTTGTTTCCGTTGGTGTCGAAC
TGCTTAAAGAGGGCAATACGCTTCGTCTTGTCGTCGGCCGTCTTGGCACGGGGGAGTCTC
AGCTTGATTCTCTCCCAGGCCACCTTGCGCTCCGCGGCGGTACGCTGCTTGGCGGCTTCC
CCGCCTAGATCAATATCGCGCGTCTTGGCGGCAGCAGCCTGGACAGGGGCGACCACCACC
TCTTCCTTGAGGGGCTGGGCGGGCGCGTCGGAGGGGAACTCGTTGCGCTCGGCGGCAAAG
TCGGAGGCGACGAGGGCGGGGGTGGCGCCAGAGGTGGGGAGGTCCCTCTTGGCGTTACTC
TCAAAGTTGGCGGAGAGGGGCACAGCGGCGGAGCGGGAAGTCCTTCGCTCATCGGCCTCC
GTGGCGGAGAAGGCCGCAGCACGGGAGGCGGTGGGGAGGATGGAAGAGTCCTCTGTGGCG
GTAAAGACGGCTCTAGACTTCTGGGGGGACTGCTGAGGAGACGGCTGGTTGGAGAGGACG
CCTTCGTCGGGGTCACCGCCGGCGGCCAGCTTGCGGGCCGTCGCCCAGTCGGCGAACTCG
TCGAAGGTGATGCTGCCGGAACCGTTGGAGTCAATCTTCTTGAACTCCGCCTCCGGGTCG
GACAGCTCGATACCCCACTCACGAAGTCTGGGGGCCTCCTTCACGAACTCCTTCTCGGTC
AGGAGCTGGTTGCCGGAGGTGTCCATGTCGTCAAACATGACCGTCAATTCAAAGTAGTCG
TAGATGTAGCAGAGGAACAGACGGAACTCGAGGAACTCCACGTAGTCGGCGTCTCCTTCG
CCCTCGGCACGGTTGCCCATGTCCTTGGCCTTGCTGAAGGCGCGCTTCACAATGTCGTAG
AGGTGGTCGGTGAACTCGTCCAACTTGAGATCCTCCTTGCAACCTCTGTACACCTCAGCC
TCGCTAAGCTTACCAGAATTGTTGGTGTCGAACTTCTCAAAGAGAGCAATACGCTTCTTC
TTGTCGCTTGACGTCTTCTCACGGGGTAACCGCTTTTGGATAGACTTCCACAACAGCTTG
CGCTCCGCAGCTGTCTTCGCCTTTCCCGTCGTGTCCGCAGTAGAGGAACCACAGCCCATT
GGAGGATATATAAAATTTAAAAGGGAGTATATAAAAAAAAAAAAAACGGAAATACAATAT
AAGGTTATATACCACTTTAAATGACAATTGGACAGAGAAAGAGAGAATGCTTGTGACGTC
AGCTGCGTTTTCTTTAGACACTTGAAACGAAGGAGAAACATCAAAAACACCAGCAACCGT
TTTTTTTAACACAACCAAAACATGAAAAAAAAAAAAAATTCATATATTTTACCTTTTCTA
AAAAGAAAGTACATCCCACTAATGCGGAACTGTCCTCTCCACGTGCCAGTGTTATGAAAT
CACTGACACCGGAGGAGAACCGTTCAAATAGTCGTCATCTCTACACGTACATCCCGTCAC
ACATATACCGGAACGCCCAGTGTTCGCGGGTAGTTACCCGGACGACCACAACGGGGGAAG
CTTAATGATGTGATCCGTGAAGGGCATACGTATGGGAAACTTTTCAATTTTTTTTTTACA
AAACAAACAAACAAAAACAAAAAAAAATCATCAATATATATAAAACAAAACAAAGGGATA
AACATTTATATAAATTTATATATTTATATCAGATATATATATATATATACATTATTCTTC
GATCGGGACCTTCATCTTAGATGTTATCCGGATCGCCGTCGGCATCGAGCTTGGCGGCGG
TGGCCCACTGGGCGAACTCGTCGAAGGTGATGCTGCCAGAACCGTTGTCATCAATCTTCT
TGAAGACGGCTTCAGGGTCATCGATACCAACACCCCATTCGCGGATCTTAGGGGCGGCTT
CCTTGAGCTCCTTGAGGTCAATGAGGCCGTTACCGGAGGCGTCGATTTCGTCGAACATGA
CGGTGAGTTCAAAGAAGTCGTAGATGTAGCAGAGCATCAGGCGGAATTCGAGGAACTCGA
CGAAGTCGGAGGAACCGGTGCCCTCAGCCTTGTTACCGGCATCCTTGGCCTTGTTGAAGG
CGCGCTTCACGATATCGCGAAGTCGGTTGGTGAACTCATCGAGGCCGAGGACATCCTTGC
AGCCGGCGTACACCTCATCGAAGGAGAGCTTGCCAGTACCGTTCTTATCGAACTCCTTGA
AGAGAGCAATACGTCTGTCCTTATCCTGCTGGTTCTTACCACGGGGGAGCTTCTGCTTGA
TTCTCTCCCAGGCGACCTTGCGCTCGGCGGCGGACTTATCCTTCTTGGAAGTGGAGGACT
TGGTGGAGTTGCAACCCATTTTTAATATAAAGGTACTCGAAGAAGAAAACACAAACTCTA
GTCGGAAAAAAAAAGGGGGGGAGAAGTAGAGTTATATATGCTAGCTGAAAAAAAAAAAAA
AAAAAGTACCGAGACTACTACAGACAACCGATTGGGATCCGAAAAAAAAGGTATCAAATT
TCCATCGAATGTATTAAAGTACACCATATAGCCTCTTTCAAGTCGCCGACGAAGATGAGT
ACAGTTTTTCGCGGATTTTTTTTTTAAAAGAAACATTTTAACCTTAACTTAAAATATATA
CATACGACTCAAAACATCTACGTGAGTCTTTACAGTTTTTTTTTTTTTTTTTTTAATTGT
TTAGTTTGTTTTCACTCGGAGGAGTTATACAAATTCAACAATTTCTTCATTTAACATAAA
TACAAAAAAACAAAGGGGGTGAATTGTAAAGTAAAATAAAAAGGAAAAATAAACTTAAAA
AAAAGAACCACTCCGTTCCCTTTTCTTAAATACACCCTAATACTTAGGCAGTGTTATCCG
GATCGCCGTCGGCATCGAGCTTGGCGGCGGTGGCCCACTGGGCGAACTCGTCGAAGGTGA
TGCTGCCAGAACCGTTGTCATCAATCTTCTTGAAGACGGCTTCAGGATCATCCATAGCGA
CACCCCATTCGCGGATCTTAGGGAGCGGCTTCCTTGAGCTCCTTGAGGTCAATGAGGCCG
TTGCCGGACTCATCGATCTCGTCGAACATGATGGTGAGTTCAAAGAAGTCGTAGATGTAG
CAGAGCATCAGGCGGAATTCGAGGAACTCAACAAAGTCCTCAGAACCAGCACCCTCGGCC
TTGTTACCGGCATCCTTGGCCTTGTTGAAGGCGCGCTTCACGATATCGCGAAGTCGGTTA
GTGAACTCATCAAGCTTAAGGATATCCTTGCAGCCGGCGTACACCTCATCGAAGGAGAGC
TTGCCAGTACCGTTCTTATCGAACTCCTTAAAGAGAGCAATACGTCTGTCCTTATCCTGC
TGGTTCTTACCGCGGGGAAGTCTCTGCTTGATTCTCTCCCAGGCGACCTTGCGCTCGGCG
GCGGACTTGTCCTTCTTGGCGCTGGTGGACTTCGAGGAAGTGCAACCCATTTTAACGAGA
ATTAGGAGTATAAAGGTAGAGTATATCTTGTATTAGAAAAAGGGAGAAGGAAAAAAGAAA
AAGAGCGTAGGTAGTAACACCTAAAGTAATTAAACAAAATTGAAAAAAACTCCCGACACA
AAGCGCAGAAAAAAAAAAAAAAAGTAGAAAGATCCATCGACACTCTTAAATAATAGTAGA
TCCATAACAAAAAAAAAAAAAAAAAAGAGCAGCTGAGTTGAATAATACTTAAAAAAAAAA
AAAAAAATGAGACACGAATGGGCGGAGACACCAATGTACTTATGTATGTGTTTTATTTCT
CCCGAATAATTAACGAAACCATTTCTTTTTCTTTCTTGATTGTTTTCAACTGTAGGAAAA
TTATAACGGCCATTTATAAAGGAGCGCACGAGTTTCGTTATGCACCGAGAAACCTCTATT
TTATTATTTCAGCCCGAAATTACAGAAGGCGTTTCGGAAAAAGGTAGATATATTATCCAT
TCTTTAAAGCAAACATCTTTGTTGGTTTGTGTCTGTTTTACTGTGTCTTGCTTTTATTTT
TATTTTTTGCATTCTCTGCAACAACAAAAATCGGAAAGAGCCACTTCGGTGAACACTAAA
AAAAAAAAAAAAAAAGGAGAGAGAAAAAAGGGAAGTGGTGAGATGGTCGAAGATGAGATA
TCAATAAAGAGGCAAGCCGCAAATGATAACGTCGCGGTGAAACAACAGCACCAACAAGAA
AAATAAAATTCACTCCAGTACGAGACGGTAGAACGACGTGTGAAACTCATAAAAATTCAG
CGAATTAATATGTTCTTTTTTTTTTTTATCGAAATAACAAATGGCTCTAATTACATAATT
TTTTTACGGGCAAATGGTAAACGTTTTCCTATAACATTGTGTTTACAGAAATTTACCACT
CGCTTTCCCAATACCAAATTTTAAAATCTACTTGTATAATCTCACTTTCGCAGTGTGTAC
ATAATGATACGAGTAGAGAGGATACAACTGAAAATGATAAAAACAAAAATTAAACTAAGA
CGCGCCAAAAATATATATATTTTAAAAAGAACAATAGCATTACAGTAAATGTTCTTTTCA
TTATAAATATATCAAGCAACGCAACTTAGATGTTATCCGGATCGCCGTCGGCATCGAGCT
TGGCGGCGGTGGCCCACTGGGCGAACTCGTCGAAGGTGATGCTGCCAGAACCGTTGTCAT
CAATCTTCTTGAAGACGGCTTCAGGGTCATCGATACCAACACCCCATTCGCGGATCTTAG
GGGCGGCTTCCTTGAGCTCCTTGAGGTCAATGAGGCCGTTACCGGAGGCGTCGATTTCGT
CGAACATGACGGTGAGTTCAAAGAAGTCGTAGATGTAGCAGAGCATCAGGCGGAATTCGA
GGAACTCGACGAAGTCGGAGGAACCGGTGCCCTCAGCCTTGTTACCGGCATCCTTGGCCT
TGTTGAAGGCGCGCTTCACGATATCGCGAAGTCGGTTGGTGAACTCATCGAGGCCGAGGA
CATCCTTGCAGCCGGCGTACACCTCATCGAAGGAGAGCTTGCCAGTACCGTTCTTATCGA
ACTCCTTGAAGAGAGCAATACGTCTGTCCTTATCCTGCTGGTTCTTACCACGGGGGAGCT
TCTGCTTGATTCTCTCCCAGGCGACCTTGCGCTCGGCGGCGGACTTATCCTTCTTGGAAG
TGGAGGACTTGGTGGAGTTGCAACCCATTTTAAATATAAAGGTACTCGAAGAATAACACG
AACTTTGGCAGGAATAAAAATAAAAATGGGGGAGAAAACGGGGAGGAATTAATAATAATA
ATAATTGTAAAAAAAGAAAGAATAAATTCTCCGTTGAACTCTTCATCATGATAACAGCAC
AGCTTTCAGGCAAAGTGATTTCATATTTCACAGGTTTTATCTTCCGCCTGTAGTTGCCTA
AGAAAAAAAAAAAAAATACCACTAATCTGTTCTTTAGTGTGTGTATGGTGTAAAAAGAAA
AACTACCAAAGACAAATACACATTATGGAAACAGGGTGGGTGAAAAAAATAAAATTAAAG
CTGGTCTGTATTTATAGGTTACATATAAATAATTATTATCGTTGTTTCCCGCTTCTGTGG
CAGGGGGTGCGCGTGGCATTATTGCTTTATGGTGGTGTGTCTCACGGATTTTTTTTTCAC
GATTCCGCCGGCAAAACAAAAAAGATTAGAAATTTAAACCATTGCACAGGAATTCTCAAA
GAGAATACTAGTATCATCACTATTGATCTTGTTGTGGCGTATTTCTTTCTTACATTTTTG
TTTTTATTTTCGAAACGCGAAACAGTGGCGACCAACTTCAAAAATATTAAATAGATCACA
AAAACACGGTTTTTGTTTTATTGTCTTCGGGTCGTTGGGCTTCGTCAAATAATAATAATA
ACCCCGAAGCACGCGAGCCTGACAATGTTTTTTTTTTTTAAAAAAAAGGTAGGGATTATG
ACGAATTGTCGCAGTTCAAAGCTTTCCTTTGCCGACTTTGTCCGAAAATGTCCGTCTCAC
CGTTTAAAAAGAAGCTTATTTTCCTGGCTCTTGTTCAAAAACCTATCAGATGCCCATCCT
TTTTTAAAAAAGCTGTAGCCATGGGTAGGATGAATTTTGGTTTGTGAATAACGGCACCCG
CAAATGAACAAACAACAGAAAATTTGCAGCAAGCCTTATTATTTGGTGAAAACAGACATC
TGCTCTGGGAGGGGACGCGTGTTTTCTGCGTAAATTATGCGTTATTCACGGCACCGTAAT
GCCACATAGGTTTTGCTTAAGATTTGCGTTGGTGTGGAATGGGGGCCGCTCCCGTTCTTC
CCGTTGGGGGCTGTGGTGCTTCTGCGCGAGCCTCGCGGGTTCCTGGCGCCCGCGAGGCTT
TGCGGGTTTGCCAAGGCGTCCTCCGGGCGGCTGAGCCGCCCCCAAGCATATCCCGCCGGG
TAAACGGGTTCGTGGCGCCCCGGGTATCGTCCGTGCCAGGAGGGCGCTCTTTCCGTCGGG
GCCTTGGGCGGCCCCGGCCCCCTTCGCCCCGTTTTGTTGGCACGGGGTCCGGGGCCTCTT
TCCCCCAAACAGGAGGGTTTGGCGCGGGGCCATAGGGGGGCGGGCATAAGCGCGCTCTGA
AAAACCGCGGAGGGGTTCCCCCTCCCTTGGCGGGAGGAGGATGCCCCCTACCAGTGGCCC
TACCCCCGGCTACAAAGCGGGAGTGAGGGGAAAGAAAACGGGTTATCAAAAAACGGGAGG
TTTTTTGGGGGACGGACAAAACCGTAAGGAAAAGCCAAAAAAGCACGCGCAGAAGAGTCC
GTCGTGACCGAAAAAGCCAACAAAAACAAAAGTAAAACATCTGAGATGTACATCTTTTTT
TTTTTTTTTCCATCAAGTAAAATATTAAAGGCCAAATGATTAAATACACACACAACGAAA
AATAATAAACATAGTTGGCTAACTGACAGGGTTGGCCTTCAGCCGCATCAGGACCGCCCA
GTCCAAAAACTCGCCGGCGGAGATGTTTCCGGTTCCGTCGCTGTCCAACATTTTGAACGT
CGCCTTAGTGTCGTCCAACGTCACCCCGTACTGCTCAAGGAGCTTCGCGCCCTTGTCGAA
CTCCTTCTGGTCGATCAAGCCGTTGTCGGAGGTATCGATGCTGTCAAACACCACCATCAG
CTCCATATGGTAGCGGAGCTGGCGCATCAAGATGTTGAACTCCATGTATTCCACCTGATT
TGCGTCGCCGGACGTGCTCTTTTCTGTGAGCGCTGCTTTGGCATTGTCAAAAGAGCGACG
GACGACGTCGGGTAGGCGGTTTGTGTAGCGGTCGAGGTGGAGGACGTCTTTGCAGCCGGC
GAGCACTTCCTCATAAGTGAGCTTTTTCGAGCCATTCTTGTCAAACTTCTCGAACAGCCT
CTTTCGGCTCTCGCGGCCCTCATTGTTGGCCTCGTCGGGAATCAAGCTGTCAATCTCATC
CATGGTGAGCTTATTTTCTCTTTTCTGCTCGGCGGTCGAAGGGGAGGACGAAGAGGAGAT
TCCGCAGCCCATCGTAGTAAGTGTTGGAAGGAGTTTAGAGTGAACTGAACGACTTTGCTT
TGAAAAGAGAACAGGGAAGTGAGGTCAATTGAGGCGACAATAACAAATACACAACGGTTA
AAGGACGACACAAAGACTTTTGTGCCACCCGCGCATAAAGAACACCAAATGAAAAAGATT
GAAAAAGGAGCTTAAGTTTCACGGAATGCAAGAGAAGAATAACAGTGGTTCTTTACAGTT
TTGCCTTTCCCTTTTCTTTTTTGTTTGTTTCTTTTTTCTTTTTTTTTCTTTTTGATGGTG
GCTGAATGAACACGTTCACGCAACAGCCTAACGGAGGAGAATAATGCCGGCCATGATGAA
CACCACGAAGCCAATGAATAGCGTCAGCTGTTCCTTGAGTCGCTCCAGAAGGGACTCATC
ACCACGCTTGCCGTGGGAGGAGGTGGGAGCGACTTCTTGCTGTCCGTGACCGGCTTCGCC
TTTACGGCGCATGACCCTGCGGCGTTCAGAGGGTTCAAGGTCCCCGATGACCAGGCCGGC
GAGCATCTTGTAGGCGCCCTCGCTGTGGTTGTTGTTGATGAAGGATTCAGTGGCGTCTTG
CCCAGCATTGCACAGGATAATGTCACGACCGCCGGGGTGGTTGTCGAGGAACTTGGTCAC
GTCGTACACCTTGTTGTTGATGACGAACCAAGCGGCGTCGGCGGTCATCTTGGTTTCCAC
CTCCTTCATGGAAATGTACTTGCGTCTCTCCGCTTCGGGAAGGGTTCCGATTTGGAGTTC
CTTCATCTTCTTGAGGGCACCGTTGCTGTGGTTGATGGCCTCAAAGTCCTCCGTGGCGTC
CGTACCAATTTTGGCAAGCAGCACGTCGCGACCGCCGGGGTGGTCGTCGTAGAATTTGGT
AACATTGTAGACGTCATTGTTCACAATGAACCATCCGTCCTCCTTCTTGTTGTGCTTCGC
CACGTCGGCGCGGGAATAGGTGGTGGACATTTCGAAAATGATTTTTTTGGAAAAAAAGGG
ATTGCTTAGTAAGTGATAGTATCAATGATAAACCTTGAAAAGGAGAAAGTGGGACAGAGT
ACGGGAGTGGCAGACAAGTATCTTCGTAGCAAAACACCGGGGAGCAGCTCCAGAAAACAA
CCACTACTTAGCAAGTATCTCAATCCGTGTGTGCTTACTGCTTTTCATTCTCCTCCTGCA
CAATGCGAAGGACATTGCGGTAAACGAACGCACTGAACTGGGTGGCCGCCTCCATACTCC
CTTCTCCCCCCAGCAGCAGGGCAGAGAGCGGTGGCTCCAGGGCGCAGTGGACAATGAACA
CTACCCCATCCCCAGCGCACTTCTTGGTCAGCCGCTGGGAAAGACTGTGGGCGAAGGAGG
ACTGCAGTCCATCGTCGCTGATGTGCGCCCCGAACGGTGTCTCTAGGAAGAGGTTGGTGC
AACTCACTGTCAACCCCTTCTCACTGGAGAGCCGGCACGGGGTGCTGACCGCGCACGGTC
CTAGGAGGGGCACATACCCCTCCCTCTCTGCCACGTCTAATGTGTTGGGAAAGGCGGAGA
GGTGTATCATCACGTGCCGCCGATCGAAAAAGACAAACTGCAGTCGTACATCCACAATGT
GGGTAGGCTCACTGGATTGGTCGTCTGCGGTGCGGACATGATAGTAGGGGAGGGCGCACA
CCACACTACGAGGGGGCGGCATTGCGTATATCTAGAACTGTGTATGAGATGAAAGGGAGA
AGAGAGGAAATAAAACACACAGGCACAAGTACGTTTACGTCGTCGACCACAGAGACACAC
AACCCTCTGCTTTCCTTAGAAACGAGAAGCACATGTTTACTTTTTTTGCGATAACAGCAA
ACGCCATGCTGAGAAATACACACTACTACAGAGGTCCTCAAAAGTGGGCGTCGTCCTCGG
AGGAGGACAGCTCGCCCCTAGCTTCACTACCAGCCGCCGCCTCACTGCCGGTCTCACCGG
CCGACTTGTTCTGATCCAACAGACCTTGCAGGAAAGTTGAGGTCCTCGGAGACACCCACC
TCCGCAAAGAGTCCGGTAGGGGAGAGGACGAGCGCCTCGCGGATGTAGCGCTGCCGGGAG
ATGCGGGCGTACTCGTGGCACAACTTTTCCAACACCAGCTTCCGTAGCTTCTTGTCGATG
GTCAGCACGCTCTTCGTTAGGGTTGGGGACTGAAACAGCTCGTAGTCGCACAGCCGGCGG
TAGGTGGTGGTGAGCACCGCGCACAGGGAGGGGACGACGACGTCGTAGCTGGGACTGCCG
CTCTGGTAGCGGAGGTGCTGCGTGGAGAGGAAAATAAACTTGACTGACTCCCCATCGGAA
CTGTCCTTCTCTTTCGCGTCCGCCTTGCCGTCCTTTACGAGAGGGGACCCACCACCAGCC
TCGGTCCGACCCACGTTGGCGGCGGGCGAGGTGAAGGAGGGGTTGTTGTCCCGTGCGGCG
CCATACTGGTAGTCGTCCGCCATCACAGTGCCACGGTTGCTGACCGTGTACATTTGCTGC
TTCAAACTATCCGACATGCCATGACGAAATTGTTTCAACGTCCGCTGTGCAATCGCGCGG
GTGGCGGTCCCCCCGGCGTAGGCCACCTCCACCTCCAGCAACAGGCCCATCAGGCACTCC
AAGAGCTCCTCTCCGTTCATGGCGACCATGAGCAGGTCGGACAGAGAGAGGGCGAGGGCG
GCGTAGCATGGGAGGTAGCGCGACTTCCACGTGCTCTCCGCGGAGCTGAGCTGGGGGAGT
TTGTTAAACGATATGTTGAGACTCTGATTCCCCGACACCCGGCCGCCTTCCTCCAGCGGG
ATACTCATTTCACTGAAGTTGGACACATTCGTGTCGGTCGCGGTGGCATCAGTGCTGGCC
TTGTAATGACTATTATTAATGCACATCTCACTCACCCCAAAATACTGTCCAATGGACGAC
TGGTTGAGACGAACAGTGTTCATCCACAGCGCTCCCTCCGCGGTGTGCAAGCTATCAATG
TAGTCTAGCAGCTGAACCCTCTTCTGGACAATGTACTCCACCAGCGCCGTCCGCTCCTGC
TGTGTTTTCACCTTCATGGTCTTTTTCTTCATGGTTGGAGAAGGAGACTGTAATGGGGTT
TGAAAAATTGTTCAATAAGGACCTTTTACACTGTTGAGAAAAGTAGAATGGAGAGAAGTG
GTCGTGAAACAGTGACAACGTACATGGTGAAGGGTTGCTAGAATGGTATGATAGCGAACA
CTGTCCTGGGATGCTTTATTTATTCATAAGTTATATTACTCATACATGTTGATGGAAATA
ATGTTTCGGTTTTTTACTATGTGCATGTGTACAAGATGTATGAATAATAAAAAGGAAAAA
TTAAAAAATGGAAAATGTTTGAACGAAAATAAAAAAATGTTCGAATAAAATAATGAAATA
AATGTTAAAACTGGATTCTTTTTATTTGTGTTATATCGGATCAATTATCTAGGTTCGATC
GTCAATAACAACAAGGCATGTTTAATGGCAGTAAAATAAAAATATAAAACGAACATCAAA
AAAAAAAAAAATTAAATATAATTTACCAAAAAAAAAAAAAAAGGATAAAATAAAAGACGA
GCGATCTTCATTTTTTAACAGTTACGCTATTTTTTGATTAGAGGTCTAATCTTCTGGATC
AAAAAAAAAAAAAAAAGAGTTATTTATATATATAATTCTTAACATTACTGATATACAAAA
AAAAAAAAAAAAAGCGTACTAGATGTGTCGGACTGATCATGGCGTACCCTCTTTACCTTA
TTTTTTCTTTTAAATGTGAGGCGTACGTCAGTCGACAAAGGTCTTAAGCTTCTGTCAGCT
CTAGACAGGTAATAAAGTTTTGGACGAGCGCTACTTCCGGGGTAATACGGTCGGCGGGCT
CTGGGACGAGACACATGGACAGTAACTCCACCGCGGCAGGACACTTTTCGCTCAGACTCT
TCAAGAGATGATTGTGGGCGACTAAAGTGGGGGTCGTGCACTTTTCCTCCGGTAACGGTT
GCAGCTGCACCACGACGGTTTTGCGTATGAGGGACTGGATAAAGCGTTTCACCGATACCT
TCTCCACCTCCGCCCCGTCTCCATTGAGCTGGGACTCGTCTGGGAAGACTGGCTCACCGG
TCTCGCTCCACACCCACGGCAGTTTGCCTGCGAGCATTTCAAATAGGGTAATACCAAACG
ACCACATGTCGCTAGCGACGGTGGGGGTTTCCCCGCAGGCGACCTCAGGGGCCATGTAGA
GCGGTGTACCGCGTAGACTGAAAATATCATTGTCCTCGGGGACGTTGGTCGCCTTGTTAA
TACAGCTCCCAAAGTCGCTCAGCTTGCACAGTCCATCGGCACTAAGTAACACATTTTGCG
GTTTCAAGTCGGCGTGGACGATGCCATTCTTATTCAAAAAATTCAGTCCGTTCAGCATAT
GGGAGGCGTACCGTCGTGCAATGGTGGGTAGTACACCAACCGGGAAGGACTGGAGTAACT
CCTTCAGTGTGCCGCCGGGCATGTACTCCATGAAGAGGATGAGTCGGCTCCCCTGCTGCA
CCCAGCCATTGTAGTTGACAATGAACTCACTGAAGAGACGGCAGGACGTGTTCACTTCCT
GCACGACATCTCTGGCCTCCACGTTGGCCTGGTTTAACCGAATGCACTTGATGGCGCTGA
TACTGCCGTGGGAGGAGATGACCTTGAAGACTTCCGCAAACGAGCCCGCCCCGATGGCGT
CCGAGACAATGAACCACTCCAGACCGGCGCTGTCCTTGACGGAGCACAGGGCGTCCTCTT
CGTAGACGTCCAGTGTGTTGAAACCACCAGTACCGGAGAGACAAGTACCGTTGAGGGTAC
CCTGCATCGTGCCGCCGACGGAGGGAAAGAACTGAATGGCAGGAACTGTCATGGAGAGCT
GCATAGGGTCTAGCTGATTGTGCAGCTTGATGTGTCGTCTGTCCCGCACCATCACCCCCA
GGGTCTCAAACGTGGGTAGCTGAAAACGACAGAAGCGGGGGCGGCGGGGGTTGGTCCGTA
GTAGCTGACGCAGGCCCTCCCGTAACTGCTTGGTGAGGCCCTCCTCGATAGCGGGGATGT
GCTGGTCTTGGCTGAGAATACTGAGCGCCTCCTCGTAGGAGCCTTTGACGGCGGCAAAAA
ACGCCCGCTTGTATCGTCGAATCGCCTTCTCGGTGGACGGGGTGCGCTCCGTGTTGTTTA
GCAGGACGAACAGCAGCACCGCCGCCTCCCCGCTCCTCGGGATAATGTTGTCGGTCGGGA
GGCATTCGTCCATACTGTCGAGGCTGGCGGCGACACGGTCTGTCAGGAGAATCCGTCCTT
CCCCCACCCCGCTGTAGTAAAAGAGACTCAGCATGAACTGGTGTCGTTCCCCAAAGAAGG
TCTTGGCGAAGGGGGAGCACTGGGCGAGGTGGAGCTGACCGGCGTCAATAATAATGCGAA
CAATCTTTTGGAGCGGAAGAGAGAACAGACTCAGGACCCGTTGAGCGTAGCGGACCGCAT
TTCTGGCTTGATTGCCACCCGTGAAGTAGATGGAAACCATGTCCGGTCGCACGGAGGAGA
CGACGCCGCCCATCACGGTGGACTGCTCGATAGGAATGCGTATGAACTGCTCAATTGTAT
CGGCGAGGTATTCTGGATTCACGACGGGGCAGTTGAAGACGAGGAGAACGGCGGTGAGGC
GCGTGATTTCAATCTTGCCGCGGAATCGGTAACACTGCTTCGGGTTGACGCCGAGGCTGA
TCTCCATTGAGCTGGTGGCCCGGTGCAGGCTGCTCGGACCCTCCAGGACCATCGAGTTCT
GTGGTACGCTGTGGACAAAGGAGTCTCGTCGCTCTGAGGCGGACTGGGCTGGATTCCTGC
CAGAGTAGCGTGCCGACGTGTTGCTGTTGGTGCTGTCCTGCAGGTGGGCGGTGGAGACGA
TTTGGACCATTTCATAGTGGGTGTGCCCCGAGCTGTCGCTGGTGCTCTTGTTTGTCTGCA
TCGCCGGCTTCTCCGCGCCTTTGGACTCGTCGGACTGACTCTTGGACCCTTTTGTTTCCT
TCGGGGAGTGAGGGGAGTAGATGGAGAAGTCAAAGACTTCGTTCCCGTCCGTCTCGTCGC
CCTCTCGTGGGCCAGAGCTATGACCGTTCTTGTGCGGTGAATGGCCTATTTCGGCGGGGA
CCGTTTCATTGTCAGGGGTGCGGAGAGCGGGGTCGCGGTGGGTGAGGACATCCATTTCCT
TGCGGTAGGTAGGCGCGTAAATCATTCAGTGCGCTGCACAGCTCCTCGTAGGCGGCCTGC
AGGTCTAACACTTCGCTCACCGCCACCCCACACAGGTGGGTGTTGGGCTCATCGTCACCA
CCGAGCATTAACAGCTGCTTGACCTTCTTCATCATTCGGGAGAACTTGACGCTCATCCTG
CTCTTCTTCGGCTGGGCTTTCGCGAAGTCGATCATCTCATTTCCTCCCAAGGGCGATCCG
CTGTGCTTGTTGTCCGATGTGCTGCCGTCATAATAGTTGGCACAGTCCAACACCTCGGAC
TCTACCCCGTTGTCGGAGGAAGAGCCCACGCCGGACAGTGCCTCGGCGCTGTTGGTGACC
TTGTTCATCTTTCCACAAATCCGTTGAAGCGGAACGGAGATACACCACCAGAGGATCACG
CTCGCCAGTGCGGCAAGGACAGAGAACACTGCCACGATGATGATGCTGATATTCCTGTCA
CGGTCTAAGGCACCAAAGAAAGAGGAATTGGGGATTTGTTCGTTGAACCCCAAACCAATT
CCGTTCGCTGTTCTCTCCACGATGACAGTACTCACATTCGCATCTCTGTAATACACTCGA
CTCACCTCTACCGGCCCGTCCGTGCGGAACTGGTCTGTTTCCTCCCTGATAATCACGTCG
ATTTCACGTGCCATGTTTTCCGGGATCGAACACTTCCCATGCATGGTGTCCATGAGGTAC
CGGGAGCCTTGCATGATGGTGGAGTCCGGGGAGAGCGAGTAGCTTTGCAGACTGTCAACG
TAGGACTGTACCACCTGGGAAACGATGGCGTGCTTGCAGTACCGTCGTGGAGTGTTATTG
AAGTTGGGGTAGAGTGCGGTGTCGTTGGTGACGAAACGGTCGCCAAGAAGGGTGAACGAT
TCGGGAAAGTAATTCACAACTTTGGGTTTCACGCCTTCGTCGAGTAACTCAATGCACTTG
TAGTACGCAAAAACTCTCTCAAAACCGTGCCCTTCGCATTGCAACGTCGTTGGTCTTTTG
GTGTAGCGGCGAAGGACGGGGGACCACATGCCGGTATTGACATCTGTGAAGGTGAGCGAC
TGCATCATGGCGGCGTTCAACCAAAAGGACGTAAAAGGGTAGCTCTCCTTCACCGTTGGG
TCTTCTGCGGTTCGGTTGGTGAGGGAGGAGGAGGGGACGGTGGTGCTCGTGAGGTTGCGG
TAGATGTAGCACGTGTCGTCTCGGCGGGAGCAGCCACATCCCTCCACCCGAAATTGAGAT
TCCTCCGTATCGTAACTGTCCGATTGGACGTCTAGTGCGTGGGCTCTCTCCGGGTAGAGC
CATATCTCCTCCTGTGTCAGTTGGGAGGGGGAGGCCTGGGGGAGGACGTAGGCCTTCATG
CTCGGGAGGTAATCGGAGAGAGGAGCTTCCTCCTCAATGTCACGGGCGTACATGTCGAGG
GACTCTATTTGCGCGCTTAAGCGGTCCACATTTTGCTCCCCTAGCATTCTAAAGTTCCCC
ATGACGTCTACCGCGCGCGCCAGGGAGATGAGCGTCGTGCGCTCCGCCCTAATCTTGGTC
ACCAGCTGCGTCCGCACCGTGAGGAGAACGGTGTTGCCGACTAACACCAAAATGACAATA
ATGGCGTAAATTAATATAAATGCATAAATACGCATTTGAGCCATTTTGAAAAGATATATT
TTCTTACTACTACTATTTTTAACTTTTAATCTATATATGTATATATAAATCAAAAAGATA
TCAAAAAAAAAAATCAGTTTTTCTTCTTTTGCGAACTCGTATATACAAAATTCAGTTTAC
TTAACAAGGTTTAAATAATGAGGCGGTAGACGTTTTTGAGGTAAGAAATCTACAGTTCAC
CGCCAGGGGAAAAAATGAAAAAAAAAAAAAAAAGGATCAGAACGAACAGCAATAAATTTT
TCAAAAAAAAAAAAAAAGAAACGAACAAAATAATAATAATAAAAAAATCCTACAAAACAG
AAAAAAAAAAAAGTACTAAAACTTGAAACAAGAACAGAGAAACGGATGATTTCATAAAAG
TAACCCGCACAAAGGCACCCGAACGAAAACGAAGTCAACTATAAGGACTCAAATCGCGTT
TATAGCAAGGACTAAAACCATTATGTGTATATGTATTATTTCGTTTTACCAAGATATATA
TATATATTTATGTTTTTCTTGCGTATAATGCAATCACAAAAATAACAACAACAAAAAAAG
TCAATGTATAAGGGATATATCTGGAGAATTTTGTATAAAACCGATAGTAAACGCACAAAA
ATGGATTAAGGAAACAAAATAATAATCATCACAAAAAAAAAAAAAAAGATTATATACATT
GAGCTTTCATAATAGGTACAGGAAAGAGAAAAAAAAAAAAAGGATAGACCGATACAACTG
TTTATAATGAAATTAAAAAGGCGTGGTTCAGGAGATCTAAGGCGGTCGCCCGCTCTGTCG
GCTCCTCGATGAGACAAAGCGACAACAGAGAGAAGGACTCGGTGCTGGGGAGGTCGCTGG
GGTTCAGCATCACTTTTATATTCTTCTGCGCGTAGAGTTGTAAAAATCGGACATCAGAGA
GACCCTCGACGGGACCCCACGTCGGCTCCTCGGGTACCTCTCCCTTCGAACCCTCCCCGG
CGGGTTCGTTGGCTTCTAACTTCATGACCCACGGCAGTTTCCCCGTAAGCATTTCAAATA
GTGTAATACCAAACGACCACATGTCGCTAGCGACGGTGGGGGTTTCCCCGCAGGCGACCT
CAGGGGCCATGTAGAGCGGTGTACCGCGTAGACTAAACACATCGCTCGCGACGCTGACGG
AGCTGGCACGGGTGACGCTGCTACCAAAGTCACTAATACGGCAACACCCATCCACGGTGA
GGAGCACATTCTGCGGCTTGAAGTCGGCGTGGATGACGTTATTCTTGTGCAAGTAGGCGA
GGCCCCGCAGCATGTCTCTGGCGTACCGCTTCGCAATGGACAGTGGCATACCAGTTGGGA
AGGCGCGCAGGGTGTTGGAGATGGTACCACCGGGCATGTACTCCATGAACAGAAAGAGGT
ACGGCGCCTGATGAACCCAGCCGGTGTAGTTGACGATACTATCCTGGAATAACTTACAGG
CAATGTTCACCTCCTGCACCACATTGTCAAGATTGATATGATTAGAGTTTAAAACCATAC
ACTTCATGGCGCACATGACACCTGTGGTGTTGATCACGACGTAGACCTCCGCAAAGCTGC
CGGCCCCGATCGGGAGCGGCATCCGCCTCCACGTCTCGCCGGTGTGGTCGGTGATGGAGG
AAGGAATGCCCTCCGTGCTAAGGCGCCTGGCGTTGGACCTGGGCTCCTTTATGCTATCCT
GCCGCAAGCTCCCAGCGTCCTTGGCGGAAAGTGGGGAGACACCATTGCTCCCCGCTAAGG
ATATTCCGCCAGTGTGGGAATAAAAGGCCGCTGCCTTGGAGACGCCATTGTCGTCATTGC
TGCTCTCCTCCTCGAACCCGAAACCGAAACTAATGGAGAGTGCCGACTGGTTAGCGGCGC
CGCTCGCCTGGGCGAACTCCGCGGCGGACAGCTTATCGTACTGATACTTGGTACTCTGCA
GCCGGGTGGAGGAACCGAGGGGCTCAAAGGCGGGTAGCTGAAACCGGCAGTACCGTGGTC
GGGGCGGGTTGGCCTGCATGAGATGTAACACAGCGCTATGGAACTGCGCCGCGAGGTCTG
TGTCGTAAAAGTTGCCGGTCTCCAGCTTGGCGAGGACGTCCTTGTAGTGCCCCTGCATCG
CGAGGTTGTATAGCTCCCGGAACTGTTGCACGCCGTCGACGAATCGGGGGTTGCGCTGCC
AGAGGGGGTCGATCACCTGAAACAGCTGAACGCCGTAGCCCATGTCTCGCTGGGGAATCA
CAAAGTCCACTGGTACCGCCAACTCCTGCGGTAGCAGCGGGGCCACGCGGTCCGTCACCA
GCAGTCTGCCCAGTGCCAGATCGTGTTTGCTGAGATCCATCAAAAAATCAAAGTGATCGC
CAAAGACGATTCGGGAAATGCGGGAGTGTGCACCGCAGTTGCCAACAAAGAAACTGCCGC
TGTCCATGACCGCCCTCGTGTACGCTCGCTGATACTTGGGTAACTTTCGTAGGATCGTCA
GGGCGCACGCCGTCCCTACCTGCACATGCTGTGCCATGGAACTATGTGCCCCGAATGTGA
TGGCGACGATATCGGGTCGAAACACCTCCAGTACACCACCCCACTGCAGCACCGCCTTGA
CGACAATGCCCATGAGGGAGCTCACCTCCAGTTCTAGGCTCTCCACGTCAATGTAGCGAA
ACGTAAAGGAAAAGAAGAGGAAGGAGCAGGTGACATTCCTAAACTTGTTCACATTCAACT
GTGGTTTTAAGTTGAGATACAGGGAGTCGTTGTTGTCGCTAGTGGAGGTGGTATGGTTGA
ACGTGCTACCCGCTTTGCGGCGGCCGGCGGCGCTGGAGGGAGACGTGCTGCGATCGGAGG
AGGAGCGCTCCTCCCTACCCTCCGGCTGACGCTTGCTGGTGGGGCTCTCCAAGTTAGGGA
CCGCCACCACGTGCACAACGCAGTCGTCCTCTTGTGGGAGAGAAAACTCCACTCCCTTCA
TTCCTTTCTTCGTCCCGCTGCCCGACCCGGCCCCCTCCCGCGAGGTCCCCCCTCTGCCCA
GCGGACTCATCATGGACGGATTATACTTTTTGAAGTTGTTGTTGTCGCTGACGCTAGCGC
TAAACGCCTTCATCTCCTCCTCCTCCTCCATCACTGCCCTCCCTTGCTGACTCACCAGAG
GAGACAGCAAGACGGCTTTGTCGGATAAATCCGGTTTGACACGCATCTTCCTGGGCAGTT
CTATCTCCTCCTCGTCCTCCTCTTCGTCGGCGTCCGTCCCCGTTACGTTGATTCCCAGTA
GGGCCGCCAGAACAGAACTTTTCTGCGCGCTAGGAACGTGTGGGGTGATAAAGAGACCTT
GCGGCACGTACGCCTTCAGCTCCCGCAGCGCCTTCCGCAGCTCCACGTAGCTGTCGTACA
GTTGATTCACCTCGGAGATGATCGTGTAACTCTTTTTCCGTCGCATCTCCTCCGTGTCAC
CGGAGAGGACGGCAGCCTTTTTCATGCCTTGGGAAATCCACCGGATCGGAAATACAATAA
AGTACCACATCATGACCGAGATGAGAAGGGTCAAGAACAGAATCACCACCGACAAGACAA
CCGACACCGTTTTGGTGCGTTCGATGGATCCTAGAAAAACGCTGCGCGGCGTGCGGTCTA
TCGTGACGACCTGCATGTGGGTGTCCGTCCCAAACCCCTGTGTGGTGAGGATATTTTTTC
CATCGATACTGAACTCTTTTGCGCACTGGTTGATGGCTAAGCTTTCATTTATTCTATAAT
AATACATGTCGTAGTTGACCACATTGCAGTGTTCCACGTACTTAATATAAGCGTCCATGA
TAATTGGCGGTGGCTCACACGCCTTTTCCGCATTGTCGACAATGTGCAGTGCGAGAATGT
AGGCCTCGCTCTCAGGGGTAAGCTTCATACTGTTACTTTGTCCAAAGTACTGTGCCGCTG
TCGTCAGCCCAATGATGTGGCGACAGATGTAACTACTGGTGTTGGTTGTGGGGATATCTC
GGTCATCCAGGGTGCCGCTGTTGACAATGACCTGTATCAAGTCCATGGTGTCGGCGCAGA
AGTAGTAGGTGAAACTTTTCACGACGGGAACGCCGTTGCAGTAATCCGCCCCCACCTCAT
TCTTAGTGGGGTAGTCGGTATGATCAATGTACATGGGACTCCATACCCCCGTGGTGTTTG
TGTGGAAGTCCACTTCCAGGTCAGCGAGGTGCGCCAAGAAATCCCCCCTGTCGGTAATGT
CTATAAGGTGCCCCAGGGGTGACCGTCGCCCCTGACAGGTTGTACGAACCGGTGGAGATG
TTGGTGGTGACGGTGACAGACTCGTTTCGGTCGACGTCGTAGTAGTAGCAGTCGCTCGTA
TTGCGAAAACAGCCGGAGGAGGAGTAGAGACGGTAAATGGTGTTGACGTCTTCTACGTTA
ATTTGATGGTTGTATCGCGCCAACGTTTTGTCGCTAATCCACATTTCAAACGCCGCCAGC
GTGTAGGACATGAACATTTCCGTCACGCCTAGCGTATTCCACGAGGAGATGAGGAGGCGC
ACATTGTCGTCCATTTCCGTACTATTCGCCAAGTTATCCTCCCACACGAAAAACCGTGCG
GAAGTATTGAATCGGGCGAGGGAGGCGGCGGCGTCCTTGGCACGCACCTCAAAGGCCCCG
AGTGTCGTCTTCATGAGGGAGGAGGAGCGCATCATGTTGGTGAAGACGAGGTCTCGTGTG
TTGGAGATGAAGCTCTTTTCATTGACCACGAAAAAGACCACAATCAGTACGATGAGCGCG
GCGCAGACAAAGAACCCATGAAGGGAGAGTATAAGGCCGATACGCATTTTTTTTTGAAAG
GGTTCCGATAGATTCGGTTCGCTAGGTTACCAGAGGCGTTGATTGGAAAACAATATTAAT
AATATATAATATATAAATAAAAAGGGTATAACGCGGACGACTAAATAATAGTGTGCAGTA
AAAAAAAAAAAAAAACACACAGAAAAAAAATTTCTAGTAATCCTTTTGATGTTGAAGGCT
TAGGATTCTCTTTTCAGATGAAAGTAAGTGAGAGAGAAAGTGGTATGGGTCCATCACAAA
TAAAACACCGAAACAAGAACAAGAACAACCACAAAAACTAAAACAGAAGGGTGATAATGC
TGTTACTATAAAGAAAAAAACAATTAATAATTGTGAATATCCACCAACATTTCTTCTGCC
GTCAATACCACCCTCTTTTTCACATCCGTTTCACTTTCCTTCTCTTCCGCGTTCTCTCCG
TCGTCTTGTGGTGCCTCCTCCTCGTGTATAATGATAGGTGTCCCCTTGGTCAGCGGTTGC
GACGCACGACGGTTGGCACTGTGAAAGAGCAGCAACTCCTTCATCATACCCTCCGCTCGG
AAGAGGGTCGACAACACCTCCTGCCCACTTTGCGTGCTAAACGAGCCACCTTTTTTGATA
TACAAGAAGGGGAACTGACGCACCCACTTTCCCAACCACGAACTGATGATGTTATGAGGA
TTAGAACTCCCATTGGCGTACGTGACGTCGGAGGTAAAAGGAATCTCAATCGGCGTGTTT
AGTCCTAGCGTCTTGTCGACTTCTACTTTCTGCATGTTGGCAGTGGGATTCTGGAGAGAT
ACAAAGAATACTGCCTTCTCGTTCATTTCAGTAAAAGAGGGCAATTCCTTATTATCCCTG
TTTGCCGTCAAGACGGAAACATACTCCTCGACGGTGCGCAACGCGTGAAAGTCACTCCAA
GAGAGGCAAAGGGCCACATTGCCCGCTTTTTGTTTTTCGGTCGTGAGATAGGTTTTCACC
TTTTCAACATAATCGACCAATTCCCTTCCAGAAAGAAACTCCGTTAAGGTGTAGGCGGAA
ATGGGTTTCCAGAAGGTCACCAGCCACACCTCCCCGTCTTGTTCAGGGAGATAGCGTATG
TCCTTGGGGGTCACCTCCTTCATCAGTCTGTCCATGCACTCCAACCAGTAGGCCACCTTA
GCGTTTCCTTTTCCTTCTCCCTGTTGATAGGTGAGAAGGGTCTGTTGTATTTCCTGCACC
AACCCGGCCAGGAGCGGACTGTGTATACGGGCAGGGGAGTTTCCTTGATTCATCAGATCG
TCTAGAAAAACACGAAAGACACTGGTTTCAAACTCCATCGGCCCCTCTGATGAGAGTGTG
TTATTATGTATCTTTTGCGTTACATGTTTGTAAAAGGTCAACAGACGCAGGAAAAACGAT
CGCTCATTGTAGAGATGCACACTAGTCTTCTCTGGGTTGCTTGGGTCCTCCTTGGAGACC
AGCAGTACCTCACTGCCCCGTCGCTCGTAGATACGCTGCAACAAGTCATACACCGCTGAG
TAATAGTAGTCCTTCTGGTTTGCACCGTCCGCCTCCATCTCGGTGAGGAGCTCCAGCGCC
ACCAGGTGAAGGTGTTGGGTGGTAATTTTACTCTGCAACCGCTGCGACAGAAAGGCAAGG
ATGGACTGATAGGTCTTCCCGGCCGCCCCGCTAGTGGTATTGGCAAAGGACAGAAAGTAC
AGTAGGAAGACTTCCTCCGCTGCCGTCAACTGATTCTTATTATTAGCGCCCTTGGACTCC
TCATTTCCTTTCTGTGCGTGACTGAGCAGTGCATTCAGCAGTAAACCCGACTTACCACTG
TTATCGCTGGTGTTGGCAGTTCGGGGAAGTGTGTAGGCCCCTAGCCACGCCTGTGTCACT
GCATTACCCTCTAACGTACCCTGCGTGACATTCTCTCGCACCAACTTGTAGAGATCATCT
AACAGTACACTCTTATTGCTACTGCTGCTATCCTCTGGTGTATTCGTCTCCAAATAATTC
ACAAACGTAAAGCTGAGTAGAATGTTACAGAAGATGCTGCGAATAATTTCTTCGTTTGAT
AGGGACAATTCAAAGTTGAGGTGGCGAACGGTATCGTGACGGACGATGCGCTCGCTACTC
TCAAACGCAACGTCTGTCGTCGTCAGCAGCGAAGTGAACATTTTCTGTACGATTTCATAG
TAGTTACTGTTTTTGTCCATATGGGCGGACAGCAATAACGCAAAGAGTAAACGTTTTTGC
GCATCCGATGTGGTATCCGAATCCCCTTGCTCTGCATCTCGCGTGAGATGGAAAAAGCGA
ATCATGAACGAGTACACCACTTCAAAACTATTTTGGCTCATTTCATGTCGTTTCAGATTA
GAATTTGTATCCACGGAAAGAAAGGCACTCTGCTGTAAACTTCTCAACGAGAAAGAACAC
CACCTCAAAGAGTAAGTTGGTATTATCAGTGTCCACTGTATTACCGTATCGTTCCTTCAT
TGCCTGACAATTCTCGCTCGTACTCTCCAAGGCGGAAAACAAATGAACAAGCAACGACAA
ACAGCGGTCGCTGTCACCAATGTACGACAATACTTTTATATACGAAATCAGTACCGTTGG
AGACTGCAGCAGCGTCTCATTGTTGGATTTAGGAAACAGCATTTGCACCAACGTTTTGGC
CTCCGTTACCATCGTCTCATACCGTTTCTGTACTTCCCGTTCAAATGAATTCGCATTATG
GCGTCGCATCATTAACGACTTTTCACTTCTCAGGATGGACAACAACTCCTTTTCTTTGTG
CACCAGATACTCTAGCTCTGCTTCCAATAACAATCCCTGGCAGGCTTGTGAGAAGAATCG
ATCCACCGTGGCGCTACGCTCCTGCTGGACGGCTGGTGCCAGTATACTGGCGATGTTGTG
CAGTAGTTGTAACGGCTTCACTCGACTCTTTATACCAGACGCCACATAGTTGGTGACCAA
TGGTTGCAGATGTAGGATGATATCTTTTTTCTCTGTCGTCACATGACGATTCTCCTTCTC
TTGTTGCATGCGGTCTGTGATGCCCAGCTCCTTCAGAAAATTATCATTCCCGTAAGCGGT
GAAAAGACTGTTTTCGGCGCCTTCGTCCTCGGAAAAATGGGACACGTCGTTCTTCTCCTC
TTTTACACTACTGTGATTGCTATTAATCGTAATGTTATTCAACAGTAGATTTACCTCTTT
TTCTAATGTGCGGTACTGTAATGAAAACAGTTTACTATTATTCGCGCTGCTGTTATTATC
ATGTGTTTTATACGTACCAACAGAAGTGATTAGTGCTGTGGAATGGAGGGATAAAATACC
CTTTAGGAGTCGCTTCATTTTCTATGTCGTAGTTGTAAGGATCTCTATTGAGTGGAGGGA
GGGGGAAAGAAAACAGGGAAAAAGAATATCTACAAAACTAGTCTCGTGAGCACCGCAAAT
AATGAACGTTGTTTTTCTGAAATAGTGTAATCATCTTCTTTATTACTGTGAGGAAAGGCA
CCAATGAAAAGATCAGTCGGGTAGCAGCCGCCACATACACCACCGAGTTCTCTCTCGTCG
ACGTCACCACCCGACAGAGAGGGTACTGCATCTTCTTTTCCTGTAAACAATAACGGCAGT
ACGCCTGTAACAGCTGTGGGTCACTTCTCTTATTCACATCCCGCACACATTGCTCCGCCC
AAGACAGACGGTTCACTTTGTTATTGATGGCACTAATTGACTTCTTGGCGTGTACGTGAC
TGGTGGACGAATTGAGCGGCTGGATCGGCATCCCTTTACGCCGTATGACATCACCCTCCT
GCGGTAACCCCCGTGCGGAGAGAGTGGTGTCTGAAATATACGTCTTCAAGTTCAGTCCAC
CTTTAGGATCGGTGTCCCCGTCTTCTTCCTGCCGCACCGCCCGCCGCTGGGTGATGGAGC
GTAGCACTAGAGCGTCTACCGGACGGGGTTGTCCACTCCCTTGCGGCAGTCCGGTGGTGT
AAGGACAGTTCCCCACAAAAGACGGCCACCCACTGCTATGACGACCAACCGTACTCCCCT
CGATCAAGTGAGAAGGAGAGAAGATGGGGTGACGACAGTTCTTGCAGCAGTAATAATGAT
GCGAGAGGGACGCTGTGGTGGGGTGGGGGTGCTCCTCTAGGTACGCCGCCTCTCCCTCGA
TCAAGGTAAACGGTTTCTCCAAGTGCAGCATAGCATCTGGCCCTTCCTCCTGACTATGAT
GATGCTTGTTTTCCTGTGGATGGTGATTACTGCTACGTGGTGTGTGCTTCAATTTGTACT
TGTTCAGATTCTTTTGTAAACTAAAAGATGTATACCCCGCCTTCCCTATGGAAACACTGT
GTCGTGCGACACCGCTTCCATTTACAATACGGGAAACTGGCCGACCGAGTGAACCGTAAT
GTCGTCTCATTGATGGGTGTTGCTATACGGCACAAAGACTTGAGAAGAGTAGGAGAGAAA
TAAAGATAAAGAAATAAACAAAAAATGTCATTCGGAGAAAGTAGAAAGTTCGATACCGCT
TTATATATAAAAAAGAAGAACATAAATATTTTCCGTTTTAAATTTTACGGCCTTCTATTT
TGAGAAACTGCAAATGAGTGAGTGATAGAGGTGCCGTCATTAGTACAACAACAACAAAAA
AAAAAATAATGTGGAATGGGTAAACTAAAACCATATAAAACTGCGTCGTATCACATCCAT
AATTACCGAAAAGTAGAACAACGGATACATCAACAAAGAGAAAAAAATGCACGTTACTGC
TTATGTCATGTAGTATCCCTGAGGGGGGACAGACGGGTTCAGGAAAGCACCCCTGTCCAC
CTCATCCTTCAGTCCTCGCACCTTCACCTCGTGGTAGGTCTGTCCTAACATACAAGTCAG
AATAATACTGACGGCGAGGTCACAGCAGCTATCGTCGTCCCCGTCCACCATACTGCAGAA
GAGACAGGCGTAGAGGCAGGTCTCCTCAAAGGGGTCTAGTGCGAGGTTAAACATTTGCCG
TGCCATGTAGCGCGTGGCGAGGATGGAGATGGTAGGACAACAGAAGGCTTCACAGCACAG
GCAGCAGCCGGCCTTACTACAGCAACTATCATTGACGACGGTGGGATCGCCGCAGGGCTC
CCCGAGGCTCTTGCAGCAGCAAGGGTTGGCGCAGGCACCAGCACAACACATGTAGTTGTT
GTAGTTCCCCTTGAGAAGTATCTTACGGGTGGAGATGGTGGCACAGTTAGGGCACCAGCA
GGCATAGCACATGAAGCCGGGCTCGGCACTGCAGGCACTGCACATCTTGACCGCCCACTG
CTCTCGTCCGTTAAAGGTGAAGATATCAAGACGATTGATGGGCTTTAAGTAGTCGTAGGG
ATAAGGGTCGTACGAGTCGCCGGGTTTCGATTGGTAGTAAGGCACCGGCGCACGGTCGGC
CAGGACGTTCCCTACCGGTACAGGGGCGGCACCGTTTGCATAGTAATACTGATCGTACTG
TGGTCTGCTGTCATATTGGGAACTGCTGTCGTACTGGGCACTACTATCGTTGTAGTAGTA
GGAGTCGCTATCGCCGTAGTTGAAGGACATGGATAGAAGTTTTTGTGTGTGTTTGCGCGG
TAAAACGGTACTGTGAAGGGAAGAGACTTTAGGGAAGGAGAATTACGGACAAAAGAATAG
AGGAGAACACCATCAGCAGAACACCACAATCTCCATGCAGTATTCAGAAAGTAATAATAA
TAATAAAAGAAATAACACACAAATTATTACCGCCTGTAGAAACCTGTATTTTCATCGTTT
TTAATTCTAAGGCCTTACGTTTTTGAAAAACTGCAACTGAATGAATGAATAAAGGTGACA
AAAATAGTACAAAACAAAACAAAACAACAACAAAAAAAATATCAATATTTAACACTTTTT
TTTTGTGGGGGAGGGGGGAAGAAATCATTATAACTGCGTGATACAAGACCTGTGGTGACT
GAAAATTACATTAACAAGTGCAACAACCACGATTAAAACAACACATGCACGTTACTGCTT
ATGTCATGTAGTGGCTTTGAGGGGTGATAGACGGGTACCTGAAAGCGCCCTGGTCTACCT
TGTCCTTCAGTCCTCGCACCTTCACCTCGTGGTAGGTCTGTCCTAACATACAGGTCAGAA
TAATACTGACGGCGAGGTCGCAGCAGCTATCGTCGTCCCCGTCTGCCATGCCGCAGACGA
GACAGGCGAAGAGACAGGTCTCCTCAAAGGGGTCCAGTGCGAGGTTAAACATTTGCCGTG
CCATGTAGCGTGTAGAAAGAACGGAAATGGTAGGACAACAGAAGGCTTCACAGCACAGGC
AGCAGCCAGCCTTACTACAGCAACTATCATTGACGACGGTGGGGTCGCCGCAGGGCGTAC
CAAGACACTCGCAGCAAGGGTCGGCGCAGGCACCAGCACAACACATGTAGTTGTTGTAGT
TCCCCTTGAGAAGTATCTTACGGACTGACATGTTGGCGCAGTAGGGGCACCAGCAGGCGT
AGCACATGAAGCCAGGCTCGGCACTGCAGGCACTGCACATCTCCACTGCCCACCGCTCCC
GTCCGTTGAAAGGTGAAGATAGCGAGATCGTCCATTGGCGTCAAGTAGTCGTATGGGTAG
GGGTCCGCGGCAGGAGGTGCGTGTCTCGGACTGGCTACGAGGCTTCGCGGTACGGGTCTT
GGACTGGGGACGGGTTTTCGAGGTGGGTTTCTTGGTTTGACGGTTGGGCACCGGCGCACG
GTCGGCCAGGACGTTCCCCACCGGTACAGGGGCGCCACCGTGCGTATTATAATACTGATC
GTACTGCGGTCTGTCGCCAAGTTGGGAACTGCCGTCATACTGAGAGCCGCTGTCGTTGTA
GTACACGGAGTCGCTATCACAGTAGTTGTAGGTCATGGAACGAACTTTGTGTGCGTGTCG
TGTGATATAACGGTGCTGTGAAGGGACGTGACTTTAGGGAAGGAATGGAAAAACAAAATA
ACATGGGATGCGTGTAGAGCAAACAGCACAAGGCACTTGGATGAAGTGAAATAACCAAAG
AGCAAATGACTGAACTGTACTTATTGTCGCATGTACAATAGATTTAAAAGCAACGAAAAA
GCACCACGAATATTCATTCTTTTCAACCTTTTTTATTTCGCTCTAATTAACAAAAACGCA
AATGTTTTATACATCGAATCAAACTTTTTCTAATAAAGAAAACGCTTTAAAATTATTTCT
TTTTTGTTTTACACGACAACAAAAACTCCAATAATGCAAAAACATTCTCTTTAGCATGCA
CAAAAAAAAAAAAAAAAAAAAACACAAAAGATAAAACGGTAAAATGCTATGCGCCGCCTG
TTTGTTCATTTCTCCTCCTTATGTCATGTAGGTGCCCTGTGGCCCTTGGTAAAAGGTATT
CTCGTCGTAGTCGGTCAGTCCTTGCACCTTAATTTCGTGGTAGGTCTGTGTCATCATGCA
GGACAGCACGCAGGCCCAGATGCAGTCGCCCATACAATCCATCAAGGACCCGCAGTCGCC
ACCAATAATGGCACCGCAGACGGAGAGGCAGTAGGTGAAGATACAGGCGAACAGGATGAG
TCGCTCCTCGCAGGGGTCGAGGACGAGGTTGAACATGCGCCGCGCCATGTAGCGGGACCC
CGCGACGGCGAGCGAGGGGCACCAGGCAATCTCGCAGCAGAGGCAGAAGCCACCTTTACT
GCAGCAGCTCTTGTTCAGCTGTTGGGGGTTCCCGCAGGGCTCAGAGAGGCAGCGACACTC
GCAGCAGCCGCAGCAGGGGTCGGCACAGATACCGGCACAGCAGACATAATTATTGTAGTT
CCCTCGCAGCAGTCGGCGGCGGACAGTGAAGGTGGCGCAGCAAGGGCAGCAGAAGGAGTA
CATGAAGAACCCCGGCTGGGCACAGGAACTGCTACAGAGCTTCACATCCCATCCTTTCCC
CCCGGCAAAGGAGTTCACCTCTTTTCTACTGTTGGGGACGGTGTAGTCGTAGTAGGAGGG
CACCGCCGCGCTCACCTGCATATTGTTGTTATTATTATTATAGTTCGGATTACCGCCGTC
CACGTAGTTACCCCCCTGCATTGGGTTTTGGTAATAGTAGTTACTATTATTCTCATTGTT
CTGATTATTTTGATCGTTGTACATTTTCTACTTTTTGCGTAGAAATGATACTTTTTGTGA
GGGGAAAGAAATACTGAAAGAAACTTTTAGCTAAAATAAAAAGGTGGGAGAAAATAGTAA
TAAACGTGCAAACAGAAGCAGAAATGAAAACAACTGGAATGAGGAAAAAAAAAAAAACAG
AAACACGAAAAATGGAGGGGATTTACTAATTAGTTATAGTTATGATCATATTGATAATGA
CAATGTTGCAGACGCACACATACGTCTCTACTTTCTCTTACCGCCCTTCTTTTTCCCTCC
AGCACCCTGACCCTTTCCACCTTTCGCACCAGCATTATTATTATTAGTATTGTGCGCCGA
CTCTTCGTTCGGCAAGGCGGACTGCTGGAGCTCCTTCTTGAGGGCGGCCATAAAGTTATT
ATTAAAGTACTGCACCGACTTGGCCTGATGCAGGATGCTGGTGTGCTTCCCACCACAGCT
GTTCTTCATCTTGACAATACACTTTTGACAGTGGTCCACATCCTGGAGAGACTCATTTTC
GGTCTCGCCGTAGGCAATATAACAATCCTTTCCATTGTTCTCTAACTCCCGTTTCACTAA
CTCGTCTAGACTCTCCGTGGCGTGGTGAGAGAGGTTGACATTCAGTGGGTGACGCTTAAT
GTACTCCTCGCGGGTAATCAAGTCTTCCAGCTCATTTCGCTTTAACACCTCTTGTCCTTT
CTTATTATGATTCTCATTAGTAGTGGCTGTGGTATCCTTTTGATTATTGTACTTGTGTAG
TAAATCACGCACGGTGCTGCCCACGGGCTGCTGGCCGGTGATCATGCTGACCGCCACCGC
CCACTGCTCGCGCATATAGGGCAGTCCCTCCTCGGTGAGACCTTCCGCCGTGATCGACCG
GCCACTGGCGTCACTGCCTTTCAGGAAGTAGTGCGCCTCCTTGGCCTGCTGGACGGCACT
CTCAATATACTGTTCCGCCAGCTGTACCCGCTCCATCCGCTTTTGGAAGGTGAGGGACTG
ACGGGCGGCGGCGGCGTCGTGACGGTTCCTGCCGGGGAGGTGAGAAGAGAACCCACCCTT
CAGCGTAATCCAGAGGGAGCCTCCCTTCTTGGTCCGCCTAGCCTTTCGTTGTGCATTGGT
CACCACCACTTCCTTCTTGGCGCTCTTTCTCTGTTTCTTCTTCTTCTCATTTCGCTCCAC
CACCTTGGCCTCCTTGTAGCTAGCTTTGATGGCACGAAGGGACTTGCCAATCTCGGTTAA
TAATTGCTTTTCATCGGATATTTTTCGCCTCCCACTCATTTTTATTAACGGTAACCAAAT
CTTGTTTGTGTTAATTGCTATTTAGGAGAGAGAGGGAAAATGGAACTACAAGTTTTTTTT
TTTTTTGAACAGGATTACTTTCGTCACGTAAAGAGAACAGTTCAACAACCACAAATCCAT
TAATAATAAAAAAGAACGTGCCTTATAAAATGATACATAAAAAAAAAAGTGATTCATTTT
TTTTTGCTGATTAATGCTTCGTTTTTTTTCTTTTTAAACGTTATTGCCGTTTTTTTCATA
CTTCGCCAAGTCTCTAAGAAGTGCAATGAAAGATGCGATTTTGGCATTACCACTCAGTCC
TTTTTTTTTTTTTTTTAACAATTCCCTTTTTTTTTTTTAATAAAAGTACAAATTCAGTTT
AAATTTAAATGTTTGAACGGGTGGTGTATATTATATAACGGAAATAATAGGAACACACCT
CAATATGTAATAGTCGGATTTGTAATTTTTTTTTTTATATATAAAATTTTGGATTTCGAA
ACACCGCCCTCCTCTGAGAAATGAGTGACAGTGATTCTTGAAATAAAAAAAGTTTACTAC
GATTTTTTCCGTATTCAATGAAAAAAAAAAAAAAACAGGATAAAATAATAATAATAAAAG
TCGCACGGCAACCGAACTCATATACTAGTGAACAGACGCTATACCGATAGAAAAATACGT
CACACAACACAATCACATACAATAATACAAAAAAAAAAAAACAAAAAAAAAAAAAACATA
TGAACAACAACATCGCAAAAAAAAAAAAAAGGACATCTACTAGGATCAATAATAGTTATT
ATTCATCATCATATTATTGTCATTTCGATAAATCGCCATTCCATTATAAGGATTCCCCTG
ACCCATATTATTATTATTATTATTGTTATTTTGAACAAAGTTTCCCCCGTAGGGATTGTG
GTTGGGGTAGAAGGAGTTCATCTGGGGTTGAGGGTCGTAGTACACGGCGGAAGGTCCTAC
GTTACCGCCGTGGTAGGCCGGCATGCTGGTGGCAGCGTTACCGCTATAAAAAGGAGGAGA
GTTCATTGTATAGATCACCACGTTGGGTGGGTTGTTATTGTTAGTATTATTATTATTCGT
AATGTTATTATTCTTGTTGGAGTTTGGGTTCATGCCTGGAGGCGCCGCCGTCAGACTGTT
GTTATTGGTGTTCGTATTATTTGTATGGCTGTTATTATTATTATTTATCAACAGAGGTTG
GTTGACGACCCCTTGCACGTACGGCACTAGGGAATGAATAAAGCCACATTTACTTCCCAA
GTTACACATTTTCTTAAATTGAAAGTGCGCACAGTGCCGTCCCTTGATGACAGGGTTGAC
GCTATTGGCGTGGTTGGCCCGACTGGCGCTGGTGCTACTATTGCCAGCGGTGGCGGCATG
ACGGTTCTGCAGCGAGTGAATTATCTTTGTCCCCCCGACGGTCAGTAACAACTCCTCACT
AGGGATGAGCTGTGGGTCGTGCAGTTGATTGTTGTTATTGTTATTATTATTATTGCTGCT
ACTGTTGGGCGGGTAGACGGAGATGATAAAGCCACCCGGTAGCGTGGGATACTTATTTTC
ATTCTTCCCGCCGCGTAGTTCCTCCGGTGAGAACTCCTCCACGCCGCCCCCAAAGGCGTG
GTGGTTGTGGATCGGGGTAATACTATTCTCGTTAATATGCACGACGGTACTATCGGGGAC
CACCTTGCTGTGAATATAATTGCAGTTGGACTCATTGGAGCACTTTTTGCTGAGAAATCG
TTTACAAATTTGGAACCGAAAACGGGTCTGCAGGCCGTACTTTTCGTATAAATGAATATA
CTTGATGCTACCAGGAGTGATGACGATATCTTGCGAGGCAGCGTAGTAGTGGTGCTGGAT
CCCCGCATCGTATAAAGAAAAATAAAACCCAGGCGGGCAGGTCAGCTCCTTCCCTTTCCC
CTCATTCTCCTCTAGCAATCGTTCCATCTCCTCGGCGGTAATGTTAGGGACGGTGTTGTA
CGTCGTGTTGGACCCCATGTCTTTTTCCGGTAGCGTCCGACCCTCCATGAAGGGAGGGGC
GTCGTCGGGGTTGGCGTGCAGGCGCAGAGCGGTGGGCACTCGTGTCACTTGTATCGTCTC
CTCGCTTCCGTCGTCCTCTAGTGGGTGGTGACTACTATTGCTGACATCCCCGGCAAAGTT
GTAGTTGAGGTTTTGATTGGAGCTGCTCGCGGAGGAGCTGCCGTCGAAGCCCATTTCCTG
CAGTCCGAGGTCGCTGGCGTGGACGGTGAAGTTAACGGCGCTACCGCCGGTCCGGCTGGT
GGGGGACACCCCGGAGGACTTCATACTACTACGACGACTGATGTGCACGTTGACGCCAGG
TGGGCTACTGCTGCTCGGACGGCGGGCACTGTACCGTGGCAGCCGGCCCAGCTCCTCGTC
GTCCTCCTCGAGCATCATCAGCTGGTCGGTGTTGACGCGGTAGAGGCCGATAGAGCTGCT
CCGCTCCGAGAGAGGGGAGTTACTCCTAAAGTGCAGCTGCTGTGCGCTACTGCCACTCTC
ATTGTCGTCCTTTTCGTCGACGTCGTCGTGCATGAGTGGTCCCCGGGAGTACCCCTGCCG
TGCGACAGAGGAGGCACGGCTGCTGTGCAGACTGCGGTCGCCGCTCCCCTCATAGGGGTT
GTGTGTCCAGCCCCGGTGACTGGTCGTGGAGCTCCCCGCGTTACTATGACTGGAGGACTG
CACCTGCTGTACCTCCACCCACAGCTCATTGGTGCTACTATTGTGATGGCCGGGCTGCGC
TGGCGGGGTGGCGTGACCCTCCTTGCCGTCCGGGGGATGCGGGATACTGATAATTTGAGG
AGCCGGTCGCCGCTTTTTGAGGTTGGCATGAGAGGACATGTACACTGTACTCTAGTGACA
CCAGTAATAATAATAATGAAATAAAATGAGAAGAGTACTTTTTTTTTTTTTCTTTATAGA
TGATTTTACGTTGAGTCACACACTGTAAAGGCTCGAGAACAGCAAAAGAAGAAGAAAAAA
AAGAGGAAACGGGGAAAAAAAAAGAAACAAAAACGCAAATAATAAAAACACTCAAAAAAA
AAAAAAAAACGCTATATTGTTTTAATATTCTATTTTGCTATAATAATGAGGGAGGGAGGG
AAATAGAACAAAAACATACCACCAAAAAGACACTCAAAGTCCGTCAGAAATCATCACAAT
TCTTTTTTTTTTTTATTGTAACTTTAAGTGTACACGTATTAATCATAATTATTCGTTTAA
AAAATGAAGATTATTTTACTTTTATTAAGAAAAGGAAAATGTGAGTTCATGACAACATGT
TTTGGAACGTACTGAGATAGTTCAGTAGCGCCACACGGTCATACTGTTTCGCGTCATTCC
AAGTTTTCGTGGTGGGTGCGTCACTTTTAGAATTATCATTATGGACCAAAAAACGGACGA
AACTGTCGACAAACTCTGGTTTCACCCGCTTCTCCATCAAACACCTCAACACGGTGTTTT
TGAGATTGGACGACACCACATTATTATTATTATTGCTGTACGGTGTCGTCAAGATCTCCA
TTAAGAGTTGATGAATCATTTCTGGGGAAAACAAAAAGGACAACCCCCGCACGAGTTGCA
CTACTTCTTTTAGAAAAATGTAATTTTTCATATCCTTGTAGTTGAACGTTCGGTTCCCTT
TCGCGGCTGGCGCGGGGTCCGTCCCCATCACACTCAATGGGAAGTCAGAAATAATCTTCT
CCAACAAGATGGGGAAAATAAAATTTTTGAGGGAGGCCTGAAACTGTTGATAACCTTTCG
TGGCGCTGACGGCAGTGGGGTGGGTAGGGTCGGCTGTGTTGGTCAGTACACTATAATACA
TGTACCGCAGTGGAGGGAGGGGACTACCACCTGCCGCCGCCTGCTCCAGCCCCCGCCACG
TGGAGAGATGGGCACAGATCATTTTATGAATCGTCCGTAGCGACTGTGCGGCAATGGCCA
AGTCGTTACAGGGGAAGCACAGGCCATCGCCTAGCTCGGTCAAGAGGGCATCAAAAAATA
ACGTTTCCTGCCCGGCAAAGGTCCAAAACAGAAGCGCCGTGGATTCCTCACTAAACACGT
TAAACACGTATAAAATAAAGTTGGCATGCACCTCTACCATTTCCTTATCCATCTGGGAAA
TGACATTGTGCTTTATTTTCTCAAATGGGTTGATGTCGCCGAACGTGTGCACGATGGTGG
TGAAGAGGGGTGGGAGGAGGGCGATCATGTCGCGCAGACACTCTTCGTTCGACCCGTTGC
TCTCGAACGACTCCTGCCCTTTTTTCAAACACTGACACAACAACTTTAACAATCGATTCA
TCTCTTCCACACTGAACCGCAGGACGTTCGTATTGCTGTTCTGATAAATGATACTTTTCA
TGTATAATTCGTAAATAATGCTGTACACCTTGTCGAAAGGTAAAAAGTTAATGTACTGCT
GAATCAAGGGGTGTAGTGCATCCCGAATCATATTATTACTATTATTATTGTCAGTTTGAC
AAGTTTCTGTCAGCTGTAAAAGGGGAAGAATGACTTTCATCATTTCAAAAAAGATATCCC
CTACACTTTTCATAATAGGCGTTTCCACGTCCGTCTCATTATTATTAAAGATGGTGATGT
GACGTACCAGTGAGGTCAACAAGTTTAGCTGATGGGCAATAAAGGCAAAACTTTCCGCGT
TATTATTATTATTATTATTATTATTAGTTTGCAACACGGAAAACATATTTTGTAATTCTT
TCACCGGGTGCGACACAAATGTGTGAAATACCTCCAAACTCTTAAAGTGGAGATTATTCT
TTTCATTTCTGGTTTCCGCTGGGGCGCTATGATAGTGTTGTTCCCGACTGAGCAGTAGGG
CCACCAAGGTCCCAATACAGTTATACAATTCTGTTTTATCCTCCGGGGCCAACCCATTAC
TATTATTATTATTGTCATTTTGATGCACAATCGACTCCAATGCCACTAAAATATCCATCA
TCAACGTATCCTGATCGGCTAACAAGTTTTTCAACGCCATTAAAAATTGGGCGAAACAGT
GACATATTTTATTGCGTAAAAAAGCATTTGTGGCCATGAGTATCCCAAACGGTTGTAATA
AATATTTATCCAACGCAATCTCCAAATACATATTATTATGATTATTATTATCATTATTTT
GATTACTGTTGTGAAAATAAATGAAAAACGGTACAAAATGGTTAATGAGTTCAAAAAAAG
CGAATGGGACGACTTCTTCATTTTGACTTTGACGATTGTTATACGCATGTAAAAAGTTTG
ATTTGGAAATAATTTCGTGAATGATATTTAATATTTCTTCCCCATTCAAATTCGTATTAT
TATTATTATTATTATTGCCAGTCATACTTTTAAAAATTTGATCCAACGGAAAACAGATGG
AGATTTCATAAATATACTTTAACAATCCCTCCGCAAACCCTACCGAAGCATAAAAATTAT
TATTATTATTATTATTATTTTCACGGACGGCGCTAAAAAACAGCTGACACTGCTCCCCCA
TGTGTTTGATGATGAGTGCACTGTGATACTTGTAGAGACTGCGAGTAATATTATAAAGGG
AGCGGCGCTGAAGAATAATGTTATCGTTAAAAATAATCGTATAACTGTTATTCTGATCGT
CGTTCAGGGCTTTAATGATGGATAATTCAAAACACCGCTTTATGATGCCAGTTGCCTCTT
CGTCTTCAATAAACGGTTTATTTTCCATTCCACTTGGATTATGATTATTATTTTGATGAT
TGGTGATGAAACCGTTATTAAGGGAAACACACTTTTTAATATATTCCATCACCCGTAATG
CAGTGTTGGTATACAAATAGGCCTCATCCACGGCAGTGACAGCGTCGTACTGCTCCATGA
AAGGATGGGAGGACAATTGCAATAATAAATAAAAGTTAAACCGAAAGTGTTGCTCCATGA
ACTGAAAAACGTCTGGTGAAAGTGGAATGAACTCCCCGCTGAGATTGCGTAATTCATTGT
TGTGTTCAGTATTGTTGTTTTGTTTGAGGAAATCACTCGCGTTACTATTCAGTAGGATGA
ACTGTTCCCCAATGGAAGTGGTCAACTCCACAATGGCGTCGAAAAATTCATAACTACTCC
CATTATTAGTATTGTTATTATTGATATCGGCTTCCAATAATTTGATAATATTCGGCAAAT
AGTCTAAAATTTTTAACGTTTGAAGGGATTCTAATTTAATCATGAAGGTTTGTTTTTTAT
TGACAAACGCGTTTAATACTTTCACACAGCTGGTCTTGATCATGGTGACATTGGAAGATT
GATTCAACGTAAAATACAGCAAATTGAGCCAATCGCTGTCGTACAATAATAAATTGACAT
TAATCCACTCAATGTAGTTTTCTAAAATTTGTAACGCCAGCACCGACGCCTCCACGTTAT
TTTGATGAGTGTTGTTTTCGGAAAGTAATCGAAAGATAAAACCCAAAAATGTAGGGATCA
CCGTTTCTTTAATGGCATCTTTTACCGCGACAAAAAGGGCAATCACTTCTTGTTTTTTAT
TCCCACCGGCCGTCGGTCTTATATTTTCATCGTTTGGAAACGAGGCGTGGAAAATTTCAT
TGATGACGTGAAATCCATCTCTTCCTAATAACTCATCCAAACTCTCAAACACCCGTAACA
CAAACAGCACCGCACAGGGATCATTATTATTATTATTATTTTCAAGAAGTGAAAATAAAT
CTTGAAACACGGTGGGCCATCCGTACGGGTAATTCAACCACGTAATCCCTAACGCGAATA
CTTTCGACACTTTATTTAAAATCATCATTTTATTATTATTATTCTGTGTCTGTAAGTAGG
CATGAATAAAGTGAATCAGAATACTATACAGTGTGGTAATGCGTTCATTCGACCCGCCTT
GTGCCGCTAACAACGGAATATGATACTGAATCGTATTAAAACACCAAAAATAGTACTTTT
CGACCCGATCGTTTCTATTTTGTTGTTGAATGGTGTTTTCAAATTGATTTTGCACGTTGA
GGACGAATAAGGCGAGCTCCAACCCCTCTTGGGACTGCTGCAGCCGCATCAGGTACGACT
CCGCCTCTAACCGGCTATCGTGTGTGCTCTGAAACTGCTGTAGACTATTGTGCAGGACTT
GCATCGTTTCCACAAAGGAGGAAAGCAGGGCGGACCCATTACTATTATTACTATTGCGTG
TGGGAGAGTACAGTTCCCGTATGCCCAGCGGTGAGCCAGGGTTGGAGGCCGACATGACGA
CTTGCTAACTTCTATATAAAAAAAGGACAGAGAGGAGGAAAATCAAAATAATAAGACGGT
TATCATTCGTGTACGGAAAACAATAAACACAATCACCGTAAGTAAAAATAAAGAGTGGAA
TTTAGTAAAGTAAAAGTCTGTATTGCTATATACTTTTTTCTGTTTTTATGATTTGCATTC
TGAATAATAATAATAAATAAAGCGGTAGCACCCTACACCCACGGCGACCACCCCACAAAG
AGCTGACTCAGCAGCGGCACACTCTGCGCCTCCTGGCACAACTTGTGTATCTGAGCCTGA
TTGGTCTGTTCCTCATTACAGCTGTCTAACTTTTCATTGATCTTGGAAATGACACGCTCG
GCATCGCCTCTCGCGGGTAAACACTTGTGATTGTTGTTGTTCTGCTCCCCCGCTCGTAGG
CTCCACCGGGTGAGTGGGTCATATACCAGCGTGCGTAGAATCGACAAGCACAACTCCTTT
CTCTCGTTTCAGTACCGCTAAAATGTGACTACTGTAATGATAAAACTTACCCGCCGTCCC
CCGCACGCCGAACCCATCCATCACATTCCGTGTGAGCCGGAAGGGAATCGTCTCGGGTAT
AAACAACGCCTTACTCTGATCAAACGCGATCCCAAAATCAATCAAGATCATTTTATAATT
CTTCTCGTGCAGCAGCAAGTTGGAGGCATGACGGTCTCCTAGGCCGATGGTGTAGCCTAG
CAGGGAGTTGAGCGCCACACTGCTCGTATAGGCCTGCAGCCGCTGATAATAATCTTGAGG
AGAGGAAACCACAAAACGTTTCGTATTATCATTGCCTTCTTCCAAAAAGAAGTAATGCAT
CGCGGGGGTAAAATTACGGTAAATGTACAACAGCATATTCTTCTTTTCATTTGGTTTATC
TTTGGGCACACTATCGAGCAAGGTACGGCACTCCAGTGTGTTCATCTCCTCTGGGAAGTA
ACGGCCGTGGGCCCCAAACATTACTTTACTACCACTGTGTTTCCCTTGCTGCACCATCTC
GCTAATATTGCCCGTAATGTACTCCCCGAAGCCGATGGTATCCTCAATGTAGTGTAAGAC
CCCACAGGTGGGGGAGAGGGGGACGACGGGATAAGTATAGATCTGCAGTGGTGTTTCATT
ATTGTTCTGAAAGGTGGTCTGATCGGCCATCCGCAGCAGAGCGTTACTCGTTTCAAAAAA
AGATTGAATCAACGCGTCTTGCCGTAAGTCGTCCTTGTGCTTTAACACCATCTTGGTCTG
CACGCCGCTCTGCAGGAGAACCGTCAGTACTTTAGGGGCGTTGATGCCACCGGGTAGAAA
GAAAACTGGATCAATTTTGTAAATGGACTGCAATGATTCAGAGGAACGAAACGATTCAAA
CAAGGCGGTCGTGGCGGGGTTCCCAGTACTCGTTGGGAGCGGAATGTGTAACTGTTTTAA
TTCACACAATTGAAAACTACGGTCCATCTTGTACGTCTTGTGTGCATGATGCGGACTAGA
CACCTTTTCACAGTGTTTATTGACATCACAGAAGGCCAATTCGATAAACGAGTGACTTAA
CCGTTCGGCTTCGGTAATACAATTCTGTTTGGCATTTTTCTGTTCGAAATGATATTTGAG
ACGCTTCACCACCTCCTGTGCTTCCTTCACCTTGTGGACATCATAACTGAAACCAACGGT
ATTTGTTTTATTATTATTGTTATTATTGCCGCTGGGTCCGCTGTAGTGAAACTCCGATCC
CTTCGCTAGACACAGTAAACTCCATATCGTGTCTAACGGTGCTTGTACACTAATCTCATA
GATTAACTCGTACAACTGCGTGGAAGTAAATAATTTAATATTCACGGCATCAATATTATT
ATTATTCTTATTATTATTATTTTGGTAGTCGTGTCCGCCACCAAGTTGGGCCGCCAACTG
TGGAAAGAGCATCAAATATTTACTTTTAGGAATAAGGGGTAATACTTTTCGAATAATACT
CATTTCCTTCTCCAACGTTTCTTTTTCACTGATTTCAAACAAAGCATGATGAATCGACAC
AGTATTATTATTATTATTATTATCAGTTTCGTCGTCCTCGTGCAAGGATAACTGCAGCCA
GGTGGACACAAAGTTATACACCGCATGCATATCCGTCTCCTCAAAGTTAATTTGCCGTAT
TTCTTTTTCTGTATTATTATTATTATTATTATTATTATTTTGGAAGGAGGGAGAGTAATA
CAAATACTTCCCATACGCATTAATAGCACTTAGACGATAAACATTAAAATTACGCTTATC
ATTTTTAATTTCTTCCAATTCAATATTTAATTCCCCCCGAATATTACTAATCCGTTGTTT
GATTAATTTGAGCTGTTCCGCATTGTGGACGACCACCGCTTATTATTATTATTATTATTA
TTTTGATTATTATTATTATTATTATGATTATTATTATTATCGGCTAATTTTCGTTGAACA
TTTAACTGCTCAAACTGAGAATTCAAATCGACACCATTTAGCAATTTCTTTTTATACTCT
GCAGAGTACAATAACTTTTCTTGTAATTGTTTGGCCAAATAAAAACACAGACTCGCAAGG
TAATAACTACTCAATCCACTATGATCGGAGGAGGACAGCACAGAGAATACTTTATCCCGT
ACCAACTCCGAAACCGCCTCTTGTCGTAGCATTGTATTATTATTTTCAGTTTCGCTGGAT
TGAGAAAGGTTCCATAATAGTAACGATAATACAATATTAGGTGAGGCGTAGTACTCTTTT
GTATGATGAGTGGGAGGAACCTGCAAGGTTTGTATCGCCTTCGTCTTGTGACCTAACACA
TACAGTAATTTCGCTTTTAAAAAGTATAAATTTAAATCCTCTCCCTTATTATTATTATTA
TTATTATTTTCGTATTCTTGGATGTAGAGGTGCAAGCGATGTAAGGCGTGACGGTTATAA
ATATGATTATGATTCTGTTCCAGTTGAAATAAATTTAAAAACTTTCCCTCCTCCAAAATC
AAATTTTTCCAATAGGTATTACTTTCAGGATTCGTTAATTTCAGAATGGCAATTTTCAGC
GGTGTAATGATATCCCGGAAAGACACCCTATTTTTATACATAGAATGATGATGATGATTA
GAAAATAATGTATCTTGACTGATATACGCACAAAAACGAGTCCTAATGGAATTATTATTA
TTATCGTTATTATCATTATCATTTTCGAGTTCTAATACTTCCGCACACTTCATAAAATCA
TTTAACGTATCGCCTAAAATTATGCGTTCCAGTAAATTATTATTATTATTATTTTTATTT
TGAGGATGGTCAAAAATATTATTTTGAAGGACATTGTGAAACGCGTTTTGGACATATTTC
TGAATTGCAAATCGACTATTATTATTATTTTATGATTCCCAATTAATAAACAAATATTCG
CAATATTTTCTTCGAATGAAGTATTATTATTATTATTATTTTCACTGTCCGTGGAAAACT
CGCGAAACCGTTTTAGAATAGAATTATAATACGCTATTATTATTATTATTATGATTTGTA
TTTCTCCACACCGCCTCAGAAATTAATTTTCTATACAATCGAGAAATATTATCATCATTT
TCATTATTTATGGATAATGCATTATTAGCATCGATGACATCTTCCCACGTAGATAGCCGT
TCTGTCGCCTTATTTTCATTATTATTATTATTTTGAAATAACATGTCACGATGGCCAATC
AGTAATTCAATCGCACTGTTGTAATCGCACTTTTCCATAAAGTAATGCACATTTTCCAAA
ATTTTATTATTATCCTTTTCACTTTCATTCTTATTATTATTATTTTCTGTAAAACCGTTA
GGAGAAAAGTAGTCATTATCTTCTTGAATACGCTTAATCATCGCATTATCTTCCTTATTG
CTATAATGATGGATATTATTATTATTATTATTATTATTAGAAAATAAAATATCTTCGCCC
AATCGATAAATATTCAAAATTTCATTTTGATAAAACTGCAAAACCGTTTTATTTTCGGAA
TCCATTATTTCAAATTTTGACGTTCGCTTATTATTATTATTACTATTTTCTTCAATCGAA
TGAGGATTATTATTTAACATTTCTTTCGTAAACGACGGAAATAACACAGAATAGGGCAGT
AAAGAATAATTTGTATTATTATTATTATTTTGATTTTGATGATTAGTTTCATTGTGATAG
TGAAATACAATATGTCGTACCTCTGCCAATAGATAATCATAATAAATCACACTATTAGGA
TGACTATAATTACTATTATAATTCTGAAATGCATAAATTGGAATAATTCCACCAATCGTT
TTTAAATTTTCAATATTTTCATTATTATTATTATTATTTATTTGATGAAAATTATAATTT
GCATTTCGCTCAAACGAGTGTAAAATGGGGTTTCCGCCCTTTTCTTCGATACGATTATTA
TTTAACAACAATAATAAATTATTATTATCTATAGTATTATTATTGGTTTTACTCAGTGCA
ATGGGCGGTATCACGACTCTATTTTCCATCGACAACTCTGCAAAATAAAAGGAAAGATAA
TATTGTTTTAATAGAAAAGCACTTTGCGCCAATAATAACGGATCGATCTCATTATAATAA
TAAATACTATGTACCGTGTGGACTGGGGGAAAACGACCAAACACCGTTTTATTATTCTCA
TTATTTTTAGAAAGTTCATTTCGTTTTTTGAATGCCTCGAAATTTATTTTTGAAATGGTG
TACAATGTTTTTAATAACGTGTGATTCAACCGTGGGAATGTTTGACTCTGTTTGACGATA
CAATGCGCCATACGCTCAAAAATAATGTGTTTCATCTGTACTTTTTTCGCGTCGTTTCGT
TTTTCTTCGTTCAAGTTGAGTAACGCGATTTGAAACAACACAAACGAAAAGATTTCAAAT
ACAACTTCATTATTATTTTGATGATTATTTTCACTTTCTAATTTTAGGAACGGTAAGACA
TATTTTAATAATAAAACACTCTCCGACAGGTTATAATATTGAATCAAATAATAACTGAGC
AGTGCCGTGAATTGTACTTCATTCTTTTCTTTTCGGGTCGTCAGCCAAAACTCATCGGAT
AACAACATTTCTTCCACATTATAATTATTATTATTGTTTTGGGAAGGATCAAAATTTATC
ATTTGATAAAAATAAAGTGGCGTAAAAAATACGAAACAATTCCCATGATGATTTAAGATC
GACAAATCGGCCTCGTAGGATTTCTTTTTTTCGTTTGGATTCATTAAACATAAATCGGTA
TAATATTGTTGTAATAATAAATGAAAATGATACGCATTTTCGCTTTGCGGAATAGACAAA
AAAGAGTGTTGACTTATTTTTTGTAAAAAAGAAGAATAACCGTTCTTCATGTATTCCTCC
AATGCATTATTATTATTATTATTATTATTTTCATTATGATGATTATTATTTAACAATTGC
ACAAAATAGTTTCGTAATTGTTCCTTTTCTTTTTCCGTTTCCTTTTTACTTCTTTTCGGT
GTACTATTATTATTATTATTATTTTCCGTATCTTCAATAATAACACTATTCTTTTTTTGT
TTTTCCCGTTCTGGAACGGCGTACAATCCTAACAACAATAATAGCTCCACAGCATTATGA
TTTTCATTATTATAATGATTAAAATTATTATTATGGATCGTTTCATTGTGATTAAAAATA
TGTTCTTGAATAAACACTAAATCGGTTTTATTATCTAATTTACAAAAACAAATGGTGATG
GCGCGTAATAATTGAAAAATAGCATAATCTTATTATTATTATTATTATTATTATTCTTAT
TATATTTGTTGTGTAATAAAGAAATCATCGACAACAGTAATTCCCGAAACAAAAATAGAA
ACAAAAACTGTTTTATATTTTCCTACATTGTAGTTTTTATTCTCAAATAAATAATCTAAA
AATAATTTCTGTTCCTGACATATTAATTTATTATGCATCACGTGGGTTTCATTTTCCACC
TTCATCACCGGCGACAAATATTGCTTTAACGTTGAAATTTTCGTTAATACTTTTAAAATA
GAATGTTGTGTTTGATCGATGAAGTGCGCTAACTCTAATAAATAATGATTATTGTTATTG
TTATTATTATTTAAGGTGTATTGCGCGTTGTGTAATAGGGAAAATAAGAATTGAAGAGAT
GAAAATTCTTCCGAGTGGAGTTGTACATGCGATAGCACGTTTAATATATTATTATTATTA
TTATTAGTATTATTTTGATTGATTTCGTCGTCATCATCGACGGAAATGACTTCTTTATTA
TTTTTATTATTATTATTATTTAATAAATCATTGATTTGTAGTGAATTTTGAAGTTGAGAG
GACATTTTATTATTATTATTATTATTTCGTATTAAATACTTTTCTAATTGTAATGTATAA
TCAAAATTTTCCAAAAAGGGATCACAGCGGCATAACGTAATCCAAGTGGACTGAATCACT
TATTATTATTATTATTATTATTTTGATTATTATTATTTAAAAATAAAACAGAAAGTGAAA
TTTCCAACGAGTGCAAAAATGCATAACGGACGCGTAAATTATGATTAGGATTTATATTTT
TTTCTAAAAATTGAATCATTTTTGGCCAAATATACAATAATAAATCACACCCCAAATTCG
TAAAATGAGATTGCTTTATAAGGGAAAGACACATGTCGACGAGTAATTGAAACACAGAAT
TATTATTATTGTTTTCATTACGAGTTGAAAAAAACTGCGTCACATCTAATTTTATAATTT
TATCGACGAAACAATTATGCACAAAGTGCCAAAAAATGTTTTCCTTTTCCTCCCTCGTTT
GAAAATTATTGTAAAATAAATCACCATTCTGATTTTTATGATGAATATGAATATAATTAA
ATCGATTCATGGAGACGTACTCTTCGGTTAGTCCATTGTATAAGTATTGCAACAAGAAGA
TAAAATGAGAAAGGGTATTGTCGTGGGTTAAGAAATGAATAAAATTTACATTTTTTTGAT
TTTGATTGGAGTTTTCCAGTAAACTGCTTTCTTGTAGGGATAATCGTATTTCATTATTAA
TATTATTTTCTTGTTTTACATCATTATTATTATTATTTTGTATCGAAAGATAGTATTCCT
TCATTTTTTCAAAATTACGATTCTCTTTTTTCTGTTTTTCATAAATGTATAAAATATTAT
TGGCCAAGAAGTCACAGGACTGTTCCACCACTTCCACGTTAATCGTCAAATGGTAAAAAG
AATTATGAATATAATGATTATGATTATTATTATTTTCACTTCCATTATGGTAAAACTCAC
ACAAGATGGAATTGGAAAATAATAATAATAACGTTTCAAATATTTCATTATTATTATTAT
TATTATTTTCAAAATAATAGTATATTGTATTTTCTGGGACGTGCAAGACTTGTTTTAAAA
TTTGTACCATAAAAGATTTATTATGATTATTATTATTACAAAAATGATTAATTCTATTTT
CCATAAAATATAGACTACGATCCGCCGCAATCGACAGAGGTGTAATGACCGTCGTTAATA
TTTCTTCTTCCTCCTCTGATAAAAGATTATTATGATTATTATTATTATTTTCTGCTAATA
ATAAACTACTTCGTCCTTCGTTTCCTTTTTTGTTCTGTTTTGTTTTTAAAATTTCTGTTT
TTTCCGATTCCGCGTACAGTTTTAATTGTGAAAATAACACTAAATTAGCATAAATAATAG
GAAAATAAGAAAGGAGCAATAAAATATTCTTTTCTTCCTCGGAAAAAGGATTATTTTCAT
TTTCGGTTTCTTCCTCTACTTCGTTTTCGGTTGATTGAATTATTATTATTATTATTATTA
TTATTATTAGTAATAGAAAGACGTTCGGCACATTTTTGGGCAAATACATTTTTAATTTGT
TGAAATAGTGAATTATTCTTATTATTATTTTATTATTATTTTCTACATTTTCTAAACAAA
TCGCAATGGGAAGTAATACAGAAATATGCTTTAATAAAAAACTTTCCGTCACAATATTTT
TATTTTTAGTTTTATTATTCGTTTGAAATAATTCAAACGGGAAAAGAATTTAACGAATGT
CGAAAGAGGAAAAACCAATCAAAAAAGACACTTTTACAATAAAATTCCGTTAAATACGAA
TAAATAGGAAAACGTGTATTTTTATGATTTTTTAAATTAATATTATTATTATTATTATTA
TTATTATTTTCCACTTCGTTAACCCAAAGCAACCACAGCGGTTCTCGTATAATATTATTC
TGATTATTATAATTTGGAAAAAATAGATTAAAATAATAATTATTCTCATTGCCGCAATCT
TTTACCATTTTCGATAAACCCATAAAAACGTATTTTTTGAAGGAAAATGGAAAATTTTGT
AGGGAAAAGATTTCCAACAAGGAAAACAAAATTTCAGAAAATAAATTATTATTATTATTA
TTCGAATTAGTATTATTATTATTATTTAATGCAAATGCTGCCTCGCTCAACGCCAATACA
CTGATAATACAACCCGTTCCTACAGTATGATTATTATTTAAATGATGATTATTTTGTTGT
AAAAATATATTTTCTTTTGTTTTCTCTAATAAATCATACACCACGTTTTTACGATATTTG
GAAAAGGTTTTCAACAAAATGGGAATATGCAACGCTGAAAATTTTTGAACCTCAAACGTA
TTTTTATGTTGCGGCAAATGAAAATGCTGAAACGATAAATACTGTAACGATAATTTTCCT
AATTTTTCAGAAATGGAACTTTCCGCGAGTGGGACCCAAACATTTACTGTTTTGATCATA
CAACAGTGCAAAGAGGAAATCGATAACGATGGAAATACTTTCTGATAATTATGATTATTA
TGATTATTGATTGTTTGTGTGGCATTGGCAGAATGAAATAATAATTGAATGGTGTAGTAA
AATAATTTAGCAATCGTTTCGATAAAAACCGTTTCTTTTTCATTTTTATTATTATTATTA
TTATAATAGACGGCAAAAGAACCGAATAAGGTTAAAATATAGTGCATGCCTTCTCCGTAC
TTATACTTTTCCAATAATAGTAGTAACGCATGTAACATGCATAATTCCAAATGAGAATGA
TGATTATTATTTTCATTATTATGGTAATGCATTTGTTCAAAATAAAAAAATTGTAACGCG
TACAGAAATGAATTTGAAATCGCAATAAATGGGGAATGAAACGGCGTTAAGGCAAAATTT
TCATTTTGAAAAATTAAATGAGAATTATTATTATTATTTTGATTTTGATTGATTATGGTG
GAAAGAGCGTTCACATATTCTATCACAATATTATCTTTATTATTATTTAAAAAAGAAAGT
TTTTCTTTTAACATAAAATTCGTTATTAAGGTTTGAAAATTTTCCACATTGATAAACGGA
TCAATCGAACTTTGCACAATTTTTGTTTTTTTAATACATTTTAAAATAAAAACTAGTAAA
TGTACACCCATTTGCGTCATCTTCACACAATTTTGAATTATTATTATTATTATTTGAAAA
AATATTCGTTAAAATTTCCATTATTTTACGACACAATAAACCAAAACAGCGCAGTGGATA
GTGATGGGAGTCTGCCAATGAGAAATGAGACGATAATAATATCAAACCCAAACTAATTTT
AGGATGATTATTATTATTTTGATGATGATCGGTCAGCAGCACAAATAGCGCTTTAAGAAT
AGGCGTAAGGGTGGCACACACGTCTTGAATAGTATGATTATTATTAGAATTTGTTTTTAG
GGTTAAAAACAACTTTTCTTCCAAAAACACACAACTACACAAAATAATATAATACAATTT
CCCATTCGAGGATTGTAACGTTTCGGTTAACATTACTTTTATTGTTTCAAAATTATTTAT
TTTATTTATAGTATTGTGTAGTTCAATGCCACATTGCTGTATCATCTGTAAATCATTATT
TTCATTTTCAATTTCATTATTATTATTATTATTATTATTATTATTGAAATTTCGTTGAGG
TACTTTCCAAATTCCGTTTCGATAGAGACGCATTAAAAAGTGAAAAAATTGAATAAACTG
TACGTAAAAACATATTTTTGCGTTTTCTGCTTTATTATTGTGGTGATTGTTATTTTGGGA
AAAGATAGTGAAATCACTTTTATGATTATTATTTTCATTAAATAAACGCAAAAGTGCATT
ATCATTATTATTATTTGTATGTTGCGTTTCATTTTCATTATTATTATTATTATTTTCATT
GACGATATTATTTTCCTTTTCCAACAATTCAAATCGTTTCAAAAATAAAAGAAAAGTGGT
CGTCATATTTTCCGCTAATAATTCTGAAAAATGGGACGGAATACTAATCGAATTATTATT
ATGATTATTTTCATTATTTTCATCGGTTGAAAAAAAGGAAAAATCACCGATATTCTCTTC
TTCCTCTCCAATGGAACTATAATGGTCTTTTTTCGGTTCCTTATTTTTATGCAACTCTTT
TTTATTTTTATTTTGAATATTATTATTATTATTATTATTTTCACGTAATAAAGTCCAACT
CATTTCTGTAAAAGGCGCCACAAAAGAGGGAATATACAGAAAAGGCGATGATCGTTTCAT
GAATAATAACTGTGGACTATTTTTTTTATAATACTGTTCCATTTTTTTCGTATTGTGAGA
ATGGTGCGGATTATTGTGTTCCTGTCGCATCATCTCCGTTAATACTACTAACGAGATATA
ATTCTCCGAAAGCGATAACACCTGTTTAAAATTTTGAATATTATTATTTTCGTTATGATT
ATTGTTATTGGGATTGTAATAATAATTACTGCCGTGGGCAATCGAAAAAAACACAAATTC
AAATCCAATTTTCATAAAATGATTCTTTTTAATATTATTCTTATTTTTATTGGCTAATAA
TTCTAAAAATTGCATACTTTCCTGGTTCGATAAATATTGTAGCATAGACCGCTAATAACG
AATGCGGAACTAAATTAGATTCAAAATATTTATAAAGAATATTATGATTATGATTACGAC
GCGTTTTTGTTTCATTTGAAAACCGAATTGTATTATTATTATTATCGGATGGATCGGAAA
TTAATAATTCTCTATTTTCTATCATGCATAATAATTGTTGTTTGACCGACTTTAAATGTT
GTATAAAAGAAATGGGCATATTTATATTATTATTTTGAAAATAAATTTTAGAATCCGACG
GGGAAACAAGTCTCTTTTCCAATAATACATTCATTAGCGCATACTGCATTTCCTTCGGTG
TATTTTGATGATGATTATTATTTATCGTACTATTATGCGTTTGATATTGCTGTGGCATAT
ACACATTTGTAAACCAAAAAAATATTTCCGTTTCTACTTTTTTATTTTGAATATTATTTT
GTAAAATGGTTCGTAATGCATTACACAGTAAGAAATCCAACGACTTGGTGGAATACGAAT
TGGATTGATTCAAAAGCGGAAAAAGAATATATTTTAAAATATTTATTTTTTGTGTCGTGG
TAAAACTTAATGTTGTCATGGGGATGGCTAATAGAATTAAATAAAATAAATGCGTTTCGC
CTAAAAAGTCGGTTTGTAAGTTTCTGGTCTGTTTTGTAATATTATTATTTTCATTATTAT
TGTTTTCTTCACTTTTTGTTCCGAAAAAAGCAGTTTCCATCATTTCTATAAAACGATCGG
CCGGCGTCTCACTATTATTATTATTTTTTTCAACATACATGAAATACGTAGTATGACACA
AGTATAAAATCACACTCCCAAACCATAAAAATTCATTAACTGAGTTTTGTTTTAATGGAT
TTAATAATAATACATCCCGACGAGACAAGAATGAAAAATTATTACTTTGTTTGGAGGAGA
ATACAATCAATACTAAATTTAAAGCATGTTCGTGTAAGATCGTTAACGCAGAAGGAGAAA
TCGATTCCAAATCTAAATGATGATGATTATTATTATTTTCATTTTCATGATTATTATTAT
TTTTCATTTCTTCCTCCTCTTTTCCAGAAATAATGGCATAAATATTCGATAATAGTTTTA
CCGACAGAAATTCTGAAAAATTTAGCGTGACAATAACGGTAATTAAATGAAATAATTCCA
ATCGCCAAATTTCTCGTTTTAACGTTGTATTATTATTTTGTTTGATGATTATTATTATTT
TCACTTATTATTATTATAATTATTATTCGTCAAAAAGGAAATGGTCGTCGTGTTTTGATA
ATAATAATAATGCAAGTCACACAAGTATTTCACGACCGATAGACTCAGTAGCCGACACTC
CTCTAAATAATCATTTTTAAAGGTGCATAAAAAACAACGTAAACATTTTAGCAAATTAGC
TTCTAATTTTAAATTTGTATTATTATTATTATTATTATTATTATTATGTTCGTTATTTCC
ATCCGTCATGGTATGAAAGGCTTTAATATTTTCGATGAGTTCCGTTAATACATACACCAC
CCCATTCTGATGAATATTATTATTATTACTATTATTATTATTATTGGAAAGAAAATACAA
GGTGGACGTGCTCTGTGGTAAGACAAGTAGTGCACTCAGCAAATCCGAAAACAACACGGC
ATCCTCTGCGGTTAATTGAATCGTATGATGATTATTATTTTGAAAACTTTCACGGGATCA
TTTTTAATAACTGTAACACCCGCTTCACCAGCCGGCGGTAATGCGTACTGTGTATCTGAT
AGGTATACCCTTTATAATACAAAAAGATTTCTTTTAATAATAAAATATACTCGGAAGAAA
AGGTCACATTATTATTATTATTGATGGTGACTAAAATATCGGTTTCTAGTACCTCTAATA
CATGTTGAAATAACAGATTTAGCGGCGTTGTGTTTTTCCACAAAAAGGGTAACAAACTAA
TTTTTCCATTTTCATTATTATTATTAGAATTAATAATATCGTTAATTAAATAATCTTCTT
CCCAACTAGTATGACTCGTTTCGGAAGGATGAAAAGCTACATGGAGCATTTCACTATTTG
TTTCATTATTATTATTATTATTATTATTATTATTATTATTTTCATTATCGGTGCTGATCC
ACTTTTCATTTTCGACAGTGTTAAGCTCCGTCGATAGAACAGCATCTGAAATACTTTCAC
GCTCCAAACAGTGTAAGTGAATAATATACATTAACTGCCGAAACGGCTTTAGTAACTCAT
TTTTAATTAAAAATCCTCTTTTTTCCAAGTATTATTATTATTATTCGGAGTTGAAACGTT
TTTACCGACGAGTTCGCAATAATGCAACAAACTCGGTTTTATTACATTTTCCAAAATAAA
AATAATCACATTACAACACACATGAATGCCAAAAATAGACGTTACATTATGATTATTGTT
CTGTTGTGGAATCGATTCAAATAATGTATAAATCTGTAATAATAAATAATTCATTTCTTT
TATCGTTTGAATCGTAAATTTTGTTTTGGCGTTATTGACTTCTAAAAGGGAAGATAAAGA
TTTAATATAACTTTGTAACTCATTTCGCTTTCGAAGGGCGTACTGTTCCTCTTCGGATGA
ATTCATGATTTATTATTTATTATTTTAATTTTTTTTTTTTCTGTTCTATGAAAGAATAAT
ATATATAGAAAATGGGGTGAATAATTTATAGAAGAAAAGGTGTATTTATGAATGTATGAT
TTAATAGTATTACTATTATAGTTCTGTGAATGATTTCTGTTAAAAAACGGTTCTTGAAGG
GTAAAACTAAAAAGAGGAAAACAGAGAGAAGAACGGTAATACGGTTAATGCATTCATCCG
TGTTGTATTCTATAAAATCAACAAAAATATTTAATAAAAAAAAAACAATAATTTTATTAT
TCATCTATAATTATTATTTAACGACTCATCACGAAAAATAACGAATACACTTTCCCAATT
GGGTCCCAACTGTGATGATAAGCGACATTATTATTATTATTATTATTATTATCTGAATTA
TTTTGATTATTTTCAGAAATTAATTCTCCTGGGGCACTCCGCCGTGCTTCCGATGGAAAC
TTAAAACAGCTCGTCTGATACCCTTCACAGGCGACTAGTAAATACACATAATACTCTTCT
TCCTTATTATTTTGATTTTGATTATTATTATTTTCTATTTGATACAGTTCTGCTTCTCTA
GCGGTTAACCACCGGTGTAACGGTCTCGTCTCCGCGTAATGATTATTATTTGTATTTTTA
TTCAATAAATCAAAATAAATTTCCAAATAAACTTTCGTTTGAAACAAAATAGGATCGTGT
TCCGTTTTGAACGTGTAAGTGGGTAAAATATTATTATTATTGGAATTATTATTATTATTA
TTCGATAATAATTGATTGAGTCGTTTGGTCTCCTCGGCGCTCTGTTGCGCTAACAAACTT
CGTTTTTCCTCCTCTTCCAAGTTTTTCTGTTTCAATAATAAAAGTTCATTTTTTTTGATT
TGGTTTAAGTGTGTTTTTCCGGAAAGGTGTTTGATAAAATTATTTTCATCACTGCAGTAA
ACATTGCACAAGGTGCACAATACTTTTCCCAAGTGATTTATTTTATAATATTCCGACTTT
TTCGCGAATTGTACCGTATCGGTGTAACTAGCCATAATGAAAAATAAAATAATAAAAATA
ATAATATTTAATAAACTAAAAAAAAAAGAGAATAGAGAGAAAAGGGGAAATCATTTATGT
TTTTGTTTTCAGAATTCTTTTTTTTTTTAATTCTATATGCAATAACGATAACAATAATAA
ATAAAATGATATAGCAGTAAAACAGCAAATCATAGACAGCACCTAGGGTCTCCGCTCCAA
GGCAGCCATGGACGGTCGACCGTGAGAACATAAATAAAATAATTCTGAAAACATTAAATT
CTGTAACAAACTTTTCAAAAATAAATCGCTTTTAATAATATCCCCAAACATGATCGCACC
CCGACAGGAACGTAAAATAAGGAAATTTAAAAATAAAGACGGAATAAAATTTAAATGATG
ATGATGTCCAATCATTTCAATTTCTTCCAGGAGACAGCGCAGGTCCTGCACCGTGGATAA
ACATAATTCTATATTTTCAATGATTATCGTCGGAAAATGGCAAATCGACATTACTTTTTT
ATTTTTATTTTCAGAATTTTGATAAATAAATCGATAGCCCAATCGGTGTAATACGTCTTT
GTAATAATGGACTTTTTCCAATTAAATCCATTGGGATAAGAATTGGAAAAGAAACCGCAT
AATTATAATTATAATTTTTATGATTATTTTCTGAAAAAGAGGAAAATAAAGCGTCCATTT
TCTGTTTTCGTTCCTTTATTAAATTCGCTAAAAAGTAACTTTTATTATTATTATCATTCT
TTATATTTTTTTCGCTCAACAACATCGATTGAAATAAGTTTATTTCCTCATTGAATCGAA
ACTGATGTATATTATTATTATTATTATGATTATGATTATGATTAAAATCTATTTCTGGAT
GGATAATAAAATACTCAAAAAAGTATAAAAAGAATTCCAATCGTACTCGTTCGTGTATGG
CATGTTGGTCTAATACCAATAATAAAGGATTATGATTATTATTATTATTATTTGAATTGG
ATAATAAAAATTGAAAATGCGATTCAAAATCTGTTTTTTCATTCTTATTAGTATTTTGCT
GTAACAGAATAAATTTATTTAACCACTGAAACGTATTGACAGAATTATAATTATGATTAT
TATTATTTTGATGTAATGCAACAATCATTTCTTTTGCTTTTTTATAATTTCTGTTTGGTC
ACCATCCACCGCGGTAGGCAACCGGTAAGATTGTTTTATAAAGGAAATGGGATTGATAAA
ACTATAAAATTCTGTTTTCTGATTATTATTTTCTGAAATATGTTCGGACGTTACTTTTTC
TGGATCTAATAATTCTCGAAATCGAATTATATTATTATTTTCATTATTCATATTCTTATT
ATTTTTATGATTATTATTCATTAAAAGTGGTTTCACGGAGAGGACTGGGGTCCGTCTGGG
CAGTGCTTTATACTGTTGTAACGGAGCATTATTATAATGATGATTATTATTATTATTATT
TTCGGATTCTAATAAACCATTTTTAGAGAATTGGTGTATTACATAATTGAATATTAATTT
TGAATGATTATTATTATTATTGTCGTCTTCTCTTTTTCGTTTAAAGGAGAATTTTAGTCG
AATGATTTTATTGTTATTTTTTTTGGTTTCTTCTTTTTTCTGTTTTTGACTGTTTAATTT
TGCGTTTTGTTTCTCTTTTAATAAAATCATTTCGTTCTGTGTAATCATATAATTATTATC
ATTTTCATTTTCTATATTTTTATTATTTTCTATTTCATTATTATTTTCTTCCATAAATAT
TAAAAACGGTACACCAAATTTTAATTCTTTTTCCGTCTTCAAAAAGGGTTTTAATTCGAT
TTAAAAGTAACTTTTTATTTGTGAAATTTTCACATTTCCAAACATTAAAAATATTATATT
ATTATTTTCCTTTTCGAATACGAATACACTTTCGAGGGAAATCAAACCATTATTATTATT
TTCGTTATTATTTATATTTAAATTATTATTATTATTGTATTTCTGTCGTATAAAATGTCG
TCTGGAGGGACCGACAAACGTTCCAACAGACTCTTTTAAAAACGCATCACGCCAAAATAA
TATTTTAATACAATTATTATTATTTTTATTTTCCTCATTATTATTATTGTTAAAATGAAG
ATTGACTTCCTTAAATAAATTAGGAAAAGCATTTTTTTCCGAAGGATGAAACATAGAAGG
AAAAAACTGTAATAGTATTTCTTGTGTTAATAGTTCTATTTTCGTTTTGGTGTGTAATGT
ATTGAATTTATGATGATTATTGTTTTGATGGGATTGCGATAATAATCGGAAAGGATGAAT
GAGAATTATTTCACTTCGTAATCCATCGAAGTGATTATTATTATTATTTCTATGCTGTGG
GACGGTATTGTAATAGAATGTATAACGGATATTATTATTATTTTCCGTTTCATTTTCAGA
AAAATCAAACGTCGAAAATATAAAATCATAACAGTTATGCATCGCGCTTAATAAAATATG
TTCCTCCTCTTTCATTCTTATTTTTCGGTACATTTTATTTTGATTATTATTATTATTATT
ATTCGTAAATGGTAATTGTCGTACGGGTATGTTATAAAATATATTAGAAATAAAAATTTG
GGAGCATACATATAAAGTTTCGTTATTTTCAGTTTCATTATTCATATAATCTAAAAAAAG
AATCTAAATTATGATGATTATTATTATTCATTTCACCACTGTGCCATTCATATTCTAACA
CCTTAAACACTTTATTATTATGATTTTGATTCGTATTATTTTCAAAATAATTACTCATTT
CTATTTTTACGCCGACCACCTCGCATAAAGTGATCAGAGGCTCTAACAAGGGCCATACAC
TGGATTGAATAGTATGATTATTCGTATTAGAAATAAAATTAGGATTTTGTTTGAAAAAAA
GGGAATTGATTTTAAAATAATGTTTTGTGTGCATCGCACGCTCACGGAACAAAACGGCCT
CCGTGAGGGACACATGAGAAATAAAATTTTGATGATTATTTTCAGAATTATTTTCAATAT
TCATGGAAGGAACGAACAATAATGCTTCCAGTTTTTTTATCGTGGGATATAATGTTTGAA
ATAGTGTGTAATACGAATGAAATGTGTGACTATAGTTTATGTTCTGTTGGTCCGACCGAC
TTAACGACTGAATCGTAGGGAGCATTCTTATTTATCGTGCTGTTGTCTTTTTCTAATAAA
ACAAAAAAAAGAGAGAGAAAAAGATGTATTCGAAACAAAAAAAGAAATACAATCCAACAT
TATTATTTTTTTTAAAAAAAACTAAAGAAAAAAGGAATTATATTATCTCACCCTATTAGG
ATTACTACCGATAAGAATTATACTTTTTTTTATATTTATTTTCTAAAAATAATCTCCGAG
GCCCCCTCCACTCTCTTTTTACAAATGAAACAATCAAATACCTTTTCCCGATGGTGTTGA
CAGTAGGCGTCAAAACACACACTACAGAGAAACAAATGCGAACAGGGGTGAAGGACGACT
GACTTTATTTTCTGATGACACAAGACACACTTATCTTTATTCATTTGAGTATTATTATTA
TTATTATTGGGAATGGTGCTAGGACTATTATTATTATTAGTTGGTAGTCGTTTGTATACT
ATCGGAAGCAAAAAAATCATCTAAAATCGTATTTGTATTATTATTATGTGTGTTAGGACT
ACCCATGACGGCACTACGCACCGCACTGTGATGATTGCAAGAGGCGGCATAATTCTCCAA
CGAGGTGGTTAGCTTTTTCTGCAATAACATTAACAACGAATACAATAATAAATGACTTTC
CTTTTCTTTTTTATTATTATTATTATTTTGATTTTCCCAGTTTTCGTACGAGGCCTGCAA
GGCTTCTCGGCTGACCCGCCCGTCCTTGCTCTGCGGTGCCAAGAGAGGGGCAAACGCCTC
CCATGTTTTATTATGATTGGCATTATGAGTTATGAAAGAGGGCGGCATCGACGAGATAGA
CGTTGGGGTGTTGGGCGAAGAATGAATTTTCATATTCGATCTTATTATTATTATTAGTAT
TATTTTGTGCGGGTTGAAATACAATTTTCACGCGTACCGTCATGATCGTTTCCACATCGA
TGGCCACACTATTTTTCGTATTATTATTATTATTATTCGCATTATTCGTATGATAAAGGG
TTTTCATCAACTCTTCCAGGGCCGTCTCTCTATAGATGGGAATATAACCGACAATCATTT
TTGTATTATTTTGATTATTATTATTATTTTGATGGATGTATTTGAATAATCCGTCCCCAA
ATAACGATAATTCTTTATAAATTTGATAGTGTCGAACTTTATCAAAATGACTGCGACTGC
CACTATTTACCGACTTCACATTATTATTATTTTTATTATTTTCGGAAAGAAGAAATATAT
TCTTAAAATACGGCGGCGCGGTACTACTGTGATGATACTTAAAATTATCTTCACCGGTGC
CACAATTTTTAATGGTCAGTTCACTTTTTTTAAATCCATAATGACTTTCCCTCGTCGTCA
TGGGCGGTACGCGTTCAAAATTACAGACGACCACTTCTTTGATATAAGACACTAAGTCGT
CGTAGTAGTATTGATCCAGTGGGTGGGTGAGGATCGCGCCGCTGATGGGGTCCATGTATT
CTGCTTTTTTATTAATATTAAAATCAGAACTTTTCGCAAAATTAATCAAAACTTTGTAAC
GAGGGTTGTGGATGACTACTTTATTATGTTGATTAGTGTGGGGATGGTCTGGGTTGAGCT
GGGAGCCTTGAGGAGAGGAGGAAAACACGGAACTCGTCGAACTAGGGTCCCGATGCATGG
TGGTGTTATTCTGCGTTGGTCCGCTATTAGCAGACACAAACTGCTTAAAACTCTCTGCCG
ATAGACTCGTATTATTCCGATTATTGCTACGACCGCAGACTCGTATGAGCACCGGTGTGT
GATATTGATTTCCCTTGTAGCGGTACCCTAACAAGCCGTCAATCTCATAGTACTGGGCAC
ACTGGAAGAAAGAAAAACCATTCCCGAAAAGGGTTTTGAAATTATTTAAATCGCTATTGT
GAAAAGGGAATGTCGGTGCGTAACAGGATTTCGTTACGGGGGATGTAGAGGGACATACTT
TTCTGTTGAATATTATTACTATTATTAGTATTTTGATTTTATTATTGTGTAAAGGAGTAT
TGACGGTGATAGGAGAGGCGGTCTCGGAGGTACCACCGGTCTGTGTGTCGGGAGAGGGAA
CGGTAATAGTATGATTATTATTATTATTATTATTTTGTTTTTCATCATCGCTACTATCCT
CCACCTTGAATCGACTAATATCTACCTTTTTATCCTTATTATTTTGTCGTTGTTCCGCTG
CTTCCCTCAATAGGGCCACACAGTCCCACTTCTTTTCCCGCTCTGCCATTTGCAGTGGGG
TTCTCCCCAAATATATTTAGTTTCGTGACATCCCCACCGTGCTGTAATAATAAAAGTACA
AAATCTTTCAATCCTAGTTGGGCAGCGAGGTGCAGGGCGGTGGCGGCGGTACCTCCATTC
GCGACATTGACATCGGCCTGAAACTCTTCTACCAAAAGAGAGGCACAGACATAATATTTA
TTGCGACTAGGATTATTTTCCACACTACCGACACTAATTTGCAATCGGTGTTCATTTTGT
ATGACCGTAAACAAAAAAGTTTGGTGGGTGGTGGGACTAAGCGCATTGACGAGTTGTGGC
CGTCGCTGGAGGACCTCTCGTAACTTCTCGGCGTTCCCTTCCACCGCATAACGATAGGGA
TCCATGATTATTTTTCAGTTATTTCGTGTGAGATAGAAAAGAAAAAAGAAAAGTAGAAAA
TACTAAGTTTAGTGCGGTTCTGATAATAAAAAAAAAGGGAAGAAGGAAGAGTGTTGCGTT
TTCAGGTTTTATTATTATTGATGGCCGATAGAAACACAAAACACTCAAAAAAAAAAAATA
CGATAGAATGAATAATAATAGTAACCGTTCTATTTTCACATATACACTTCATTATTTATC
TTCTCCAAATAGATCCCCATAACGAATTATGATGATTACTCGTATTATTATTATTACTAT
GAGAATCGACAATATCCACGAACACGACATCATTCACAGTATTATTATTATTATTATTAT
TATTATTGGCGGTTAGGTTGGTAGGAATGGTATTATTATTATTAAGGTTTGTATTCAGTG
TGACGAGAGATAGTAACGTAAACCGCTGTGGTGTCTCTTTTGGTAACGAAATGGAAAAAT
TAAGATTACGGTTACTATTTTCGTCTTTTTTCAGGTCCGCATTGGACTTTCCACCAAAAA
GAAGAAAAGAGGCGTTAAAATACGTTTCCGCGTTTCTTTTTATTTCTTCCTTCATAGAAT
TATTATTTTGATTTGGAGGTGCATATCGATTAATTTGACTAAAAATCACATTTTCCAACA
AGTAATGAAATTTAGTTTTTAACGTTTCTATCGTTTGTTGATTATGATGGTTCTTTCCTT
GTAGGACACTCGAGAATAACAACTGCATATAATACACCTCAAAAAAGACATGCACAAAAA
AGTAAAACAATCCACTTTTAAAATTTTGATTATTATTATTATGATTCTTATTTATTTCGG
TGGTGATATACGGGACGATATCCTTTTCCATCAGTGAAGAGAGCGCGGTGGTCAGCGCCA
CAAACAAAATAGCATTCATCGACTCTGAAATACTCAAACGACAATCCACGCAGGAGTCAT
TATCGTGTTTTAAAAATAAAATACACTCTTGTAAGGAAAAGAGCAAGTGGTAACACTCTT
TACCAATGATGGAGGGTACCACACGCATTATGATTATTATGATGCGGATAGATTTCAGAA
AATAAAAGCGTATAATAATTTGTAAAATTGGAATGATTGGAATTCATTTGGGACAGTTTG
TGTTGAAATAATTGAAACGTTTGGTCCACGTAAAGACGGCGGACGGCGGAGGAAAACGGA
AAAAGAATCATTTTCGAATGAATTAATTTTTCCGCCTTTTCCATCACAAAAAGTGCATTT
TTTTTATTTTGTTGTAACGTCTTGTCAAACGATTCTTTTATCATTTGATTATGGTTATTA
TGATGATTATTTTCATGAATAAACACTCGTTCCATTTTCTCTATGCCTGCCAATAATGGA
AACAACGTTTGTTTACTTTTGAATACGGATACACACAATAATACCAAACAAATATTATTA
TAATTATTATTATTTTCAGCATTATTGGAGAGTTCCATTTCTGCCGTTTTTTTCATAATC
GCGTCTGTTTTGGCATTAATCGATAAAATCGATTCCGAAATCCATTTGGAAATATTTTGT
AATAAATTTAACATTATTTTATTCGCATTTTCATTATTTTCATTGTTATTATTTAATAAT
AAAACACTGTCCAGCACGACCGAAATAATATCATTTAAAATCGTAGAAAATAGTGAAAAA
GAAATAAAAGGTGCGTTGGACGTTTCGTGAAGGGAATTAAATAACGTCCCCGAAAATAAC
GCTTCCCGAATAGAATGATGTATTTCATCCTTATTATTATGAATATTTTTGGAAGGTAGT
ACATCGATTTTATTTCCATTAGAATTATTCTTCATTAATGAGATGGAGGAAAAAGCAGTA
TGGGACCGAAGTACGGTTATTATTTCTTCCTTTCCAATTATTATTATTATTATTTTCCGA
TAATAACTGTATAATACGACAAAACAAACTCAAATAATCTTTATTATTATTCGTATTGCT
GCTAGGATGTTGTTCTTCCTGATTCTTATACGCTGCCAATACATCCAAAAATAATGCCTT
ATTATTATTTTTATTTTTCATTTCATTATTTTCCGGAAGCGTCACCCAATAATCGATCGA
GGCTTGTAATACATAATTCATTGTTTTCCACGACGACTTTAACACGGTTTCGAGCGCCGC
ATAAATCGTTTTCATTAAGAAATCTTGCCACAAAAGAAAATTAAAAATACTATTATTATG
ATTATGATTATGATGCGTGCAGGACTGATACAATAAAATAATATGGGACGGGTTGACGGT
GAATTTCACAATAAGAATGGAAATAAACGGTTCGAATCGATTTTTTCGTACATAATCAAA
AAAGGATTTTAAAAATGTATTTTCCGTTTCATTATTATTCTTCAAATGAAATTCTTTTTT
CGTTTTGGAAGTGTCATTTTTTAAGTTTACTATCGGCACAAAACTGAATTAACTGTTGAA
AATAGTACGGGTCACTTTTTTTATAATGTAATAAACTTTTAATCGACTGTAATTCCGAAT
TATTATTATTATTAATGGAAGTATTATTATTATTATTGTGATTACTACTTTCTTTGGGGG
TCACGGTGAGAATCTCCTCTGCCAGCATGGTATACAAGTGAAATAAAAATAATGCAATAT
AGACAGATACACTTTTAGGATTATTATTATTATTATTGTTTAATAATAATGATAATAACA
TTTCATTGTTTTTGGTAAAATAGGCTTCACATAAAAATTTCTTTTCCTCCACGATTTGCT
CATTTAATAACATTAAAATGACTTTTGCTGACACTGGTAAATGACTTCGTTGTACATATT
GGAAAATTTCACAAAATTCTAAAACGGATTGAAATACTTTTTCATTTTCATTATTATTAT
TATTAATAATATTTTCGGTTTCGCTAAACAGTACTTCCGCCTGTGCTTCAAAGTTATGAT
ACTTTTCATTCTTATTGCCATCTTCGTTAAATACAATAAAAAGAATTTCATTTTTACTAT
TATTATTATTTTGAAAAGAAGATAAAATAATTTGGGTAATCATTAAATATTCTTCCAAAT
CTTGTTTATAATTCATTTTTATTTCATCGTTATTATTATTATTATTATTTTCTAATGTCT
GTAACGTGCATTGGGTATAATAATACTGTAATCCTTTTTTGATAGACTGAAAAACTCGTT
TGATCGTCTTGTGCAAAAATATTTTACATTTTTGTACTTCCTTTACTAAAAATGAAATTT
TATTTTTATTATTATGATTATGATTGGAAGCATTAAACACTAACTGTCGGTCATTCATAT
ATTCCGTTTGAAGCGTGTAAATACACTGTGCGATCTCTGTCAGGGCTGCATTAGGATTAT
TATTATTATTGGAGGTTTCCATGGTGAGAAATAAATTTTCTATTTTTAATAAAATAGATC
GACACGTATGGAGTAAGGTTCGTAAGTGTTGTTCGGTAGCCTGATCCGCTTTATTGGCAC
TATCCACACTATTATTATTATTAGTATTATTGGTGATTTTATTTTTGGAATTTAATTCCG
TATTTTCATATTTTATAATATCGGCACAAATATAATTCAAACTAGAAATTTCCTCACAGA
CTTTCAACACCGATCCACGAGAGAGGGCATCCTCTTTTTTATTCGCTTCACTATTATTAT
TATTATTATTCTGATTGTTGTGTTCCTTGATGTAATCTTCCAGCCGCTCCAGCTGCTGTT
GGCACTTTTCGACGGTGTTGTCCATGAAGAGTCGTTTTACTTCATAATGGACCTCCGCGA
TTAGAGAGTAATCCGTCTTGTTAGGGTTGTACATGGGCGATAAAAAGATGTAAAGTAGTG
TTGAACTAGTGTTTGAGTTTTGTTTAGAAACTTTTGAAGAAAGAATAAGGAGAGAAAAAG
AAAGTATCTTTTTTCGTGTTTTATCCATCACAAGGGCAATAAAAACAAATACAAATACTT
ACTATGACGTATACTATTTTTTATCTTATACTATACAAATGAATCATTATTATTCCTTCT
TCAAGCGTTTCAGTACATTACCACTATCCCACCACCCACAGAACCCTCCGCCAATCATGG
CAGGAGGATGACTATCATTATGATTATGATTCACATCATAATATAATTGTGCATAACGGT
AGTAGTGAGCGAGGGAGCGACTCTTTCCTAGTCCGTACCGGTCTGCGTCTAGCAGCGCTG
AAATCAAATAGGGTAACTCCGTCTGATTATCGTGGTGATGATTAAAGTCCGTGTAAGGGA
TCCACACCGATTCCTTATTGGTTCTGTTTTCACTGTATTGTTGTAGAATACTATTCACAC
GGTCTACATCCATTACCCTTCGTGGGTGCAGCAGCGAGGGCGCCCACACTTCCTTTTCAT
AAAACACCGACGTGGAGCGGTCCGCCACTTCACCAATCTGTAGAGAACTATTTTTAATTT
CAATCGTATCTATTTTCTTTGTGATGGATCAGTTGGTAATACCGTTTCGCGTTAGGGTTT
TGGTTCAGTAAGGCCACCCTCTCCTGCCACCGCTGTAACTGTTTATTTTCCAATTCTAAC
TGTTCACTTTCGGAAAGAATCGGTCTGGTGTGTAAAACATATTGTATGCGTTTACGGCTG
TAATGTTGTAAAGCATACGGCAACACCTCCAGTGGCACGGGATGGTTCTGTTGTGGCGGT
CGTGTCCGTTCCGCGTAGACATGTTTGGCCTCCTTTCCGTACATAATAATGATACACAAT
ACTCAGTCGGTGGACTGAATAGATTAAACCGATGGGTGAAGAGCCTCGCCGCAAACATAA
TTTCCTCTCCGTCAAAGATATACGTGAGAAACGGGTCTGGCGGGACTTGTGACAGGATTG
TGGGGGCGTGACCAAAGAGGAATCCACCAGCGACGAAGGGCTGAGGGAGATACTTTTTCT
TATTTCGAAATAGACGTTCATTATCATTTTGATTGAGATCGAATGTGGTGAGGGGCGCAA
ACGCGTCACTGTATTTTAGATTAAACGAAAAGTCTTCCTCATTCATATGATTATCCTCGC
TAAGATTTAGGATCACCCCACTGAACCTTGGATACCCATAGCGCCTAATATAGACCGCTT
GACACAGGTAGGCAGTCTTGTGAAACTGATAAAAACTATTATGATGATGATCAGTAGTAT
TATTGTCGTCTTTTTCTGGTTCGTATTGCAGCGGATAATGCGACAGAATCGTTTTACGAT
TTTCCGTTCCGTATTTCGAAAACAAAAGAATCACCGCCGCGTCAAAAAACGGAATAAAAC
GAGTATGGGAGTCTATTTTCATCAAGTAGTCCTCTCCTTGATACAGTAGTACAATACTAA
GGTAGCGGCCGTAGGTGGGCCCGCGGGACTGAGAGGGATGCACCCGCCGCCGCCGTATGT
TGGATTGGAAAAAACAAACTTCACTTTCATTCTTATGATGATGCTGACATGGCATCGGTA
AGCGTGCTAGCCCAGAGACACAGGAAGGATCCAGACTCTCTCGTTTATACGTATTGTCTT
TTTCATTCCGATAGCGGTACTCCCGGTTGCGGTGGTAGTCCTCGCTGTAGTAAGTGTTGT
TCCGCAATCCCCACAAAGACCCGCTCTCTTCGTTTGGATTTGAGAATAATATCACGAAGG
GTGTGCCGGCACTCGTCGTCCCTAAAACTGGCAATACTAATAAAGAGTGTTTTATATTGT
TCCTTTCTTATTATCATTGGCTGCAAGGCTTCCCTCCTTGACCTCTAGAATACCTTCAAT
CGTACTCAGATATGGTCTTATCTGTGTCGTATAATATTGTAGTGGTATCTTCGCCTGTGG
GGGTACTGTGATAGGAACCGCCGCTGACGGTAATGCTACCTGTAGGACCGCAGACACTGC
CTGCCAATAGCTGTGATAATTGTACCGCATAGAACGATGAGGAGGAGGATTTTGATTGTA
GAGTTGGAGACGAAATAAAGCGCGATTGGCCTCTAATCGTTGTAGTGGAAAATACGGTTT
ATAATTGTAGATGGAATACAAATCATCTAACCAGCTGATATTATTATTATGCTTATCATT
CATCAAGTGAGTATGTCGTAGCGTTAGTAGTTGAAACGTTTCGTGAGGAAAATATTCAGA
TGGTAACTCTCCTCATTATTATTATTATTGGTTTGAAAGATAGACTCCAGAACACGTTCC
TCTGACGCTGGCGCCAAGACAGCTGGCGTCCGATACTTATTTTCCGAAAATAAAAACAAC
TTACTCTTTTCTGTCATGGTATCGTAGTACTCCTCTTTAAGAAAACCATCCCGTCCGCTG
TAGGAGTAATTTATATTATGCACTTCCCCGTGTTGTTCACTTTTGATATAACGCAACACA
TAATCAAACAAATCTTTACTACTGTGATGAGGATGATTTTGTATTCTTGTCAGTATCGCT
TCAATACTCTCCAATAATTCCAAATAATACAACGCTTCTTCTTTGGAGGGAATAATACGA
TCAAAACGAACATATTTGGACTGTTCCTCATCTTGGTCGAATGCCACGAAATCATCCAAG
TAACTAGACAGTAATTGTCTTTTTTGAATGCGTAAATCTTTTATATCCGCGGCAAAATAA
AACAAACGCTCCTTGTCCTCCTTGGCCATCCGCTGGGCGCGTTGAACTAAATAAAATGGC
GTCTGAATAGTTTCCGAGCGATGCTGAAAAATAGAATGCCAACTCGTCCCGAACGGTTGC
TCCTCGTTCGTCCCCTCTAACCACCCCTGCAAGGACGGAAACCACTGACACACCAGCAAT
AATATACCGATACTGATACGCTTCAGCAAGAAAGGTCTCGATTGGGTTGGGCGGTGAGAC
GGTAAAGACCCCCAAGAGAGGAGCACTACAACCAGGAGAGTGGCTAAAAGAAGATTTAAC
AATGATAGGAAGGCAATAAACGGCTTTGGTGTGGCGTCGGACAACGTCGCGGTAACCGTT
CTGCCACAATCTTCTCATCATCTCCGACAGAAATCGGAAAAAGGGAACAATGCTCCAACG
GCGTCTTTTCGGTGATGTAGGAGGCCTTCCACCCTCCAAGTCTTTAATCCACACGGTAGC
ACTATCCGAACCTTCCGCTGGCGCCGTGTGCCGTGCGTGCATCTATTTGCTAAGCAGTGT
ATAGAGGACTTAATGTACTATCATTACAAGGGGGATGGAAAGCGGAGAGGGAATAATAAC
AGTAAACGCGTCCATTGTGTGCGTGAAAGGCATTATCCAATGAACGACAGAGGTAAACAC
CCTTTGTGATTGTTTTACGAACATTATTATTATTATAACAATTGTAGAGATTTTCCTTTT
GTTGTTTGATTTAGGGAAACGAGAATAACCCTTTGAAGTTGTCAATCTCATTCAGCTCCA
AAAACAGGCTCAACTCTCTGCGGCTGCCCAATCCAAAACCATCCTCTTTGTTTTTCATCT
TCTTGTGCTTCAACAGCTGTTCGTGCATCCGCAGTGTCGTCTTACTCTGCAGTTCCACTA
AGGTGTCCACCTGTGTACTGTTCTCCTCCTTCTGTGATGCTGACGGTTTGTCAGATGGAC
TGGATGCCTTGCCTGTCGTATTGGTATTGGCATTATCATTACGATTATTATTATCGGCGG
TGGTATTACCACTGTGAGAAGTACTGTTTGATACCGTCGTCTGATTCTCAACAGAGGGTT
TCATTTCCTTCAAAATTTCATCTTCCGCATAAAAGTCCATCAGCGCTTGCTCCACGTCAA
ACTTATACCCAATGACCTCCGTCGGGGCGTAGCTGTTCCAGCCAGCGGTGAACAGACGGG
CGGACCAGTACAGGTCATAGACACTCTTCTCCTGCTCCGCCTTGCCACTGTAGTCGTTAC
TGCGCACGGTCTGTAGCAAAGGATCCACCGGGACCGCAGGGAGGGAACTGAAAAAGAGAA
CTAGTGGTAGAGCGTTCGTCCTCCTCTTGGCTAAAGATCACACGACACTGTAATTTTTGA
GGATAGTCAAAAAAGGTTTCGGCCACCGTGAACACAAAATTCATATGGACGGCGGACTGC
AAAATGCTCACCGTATTGGTGTCCTTGTTGAGAAGCGGAACAGCCTCTCCTTTGGTCTGG
GAGGGACTTAACTTGTGTTGAGGGAGAAATGCGTTCTTTGCTGGTCACCAACGACTCCAA
CTTTTGTCGGTCTTCCTTATCTGTAAGTTTTCGCACCTTGGCGTACGAGGGGGCATGTAA
AGCAGAGTAGCACTTCTTATTATTATTCTGCTCGCACAGTGGGCTCTCCACCAGCACTTC
CCGCAAGACGCCCTTCTGTGATTGAATAATAGGAATGAGGCCATCCCGGTTATCGGCATC
CTGTTTCTTTTCCTCCTCACTCGCATTGTCGTTGTTCAAGTCAAAACTGTTACGGTTGGT
AAAATACGTCAACTTCTCTTGAAGCGCTTTCTGGTGCTCAAAGAACCAGCAACGCTCATA
GAGTTCCTTGTTAATCTTATTGCGGCCCTTCTCCACAAAGTGCCCACAGCTCTTCTGAAT
GAGGAAGAGGTACTCCCGATCGTAGGTGATGTCTCTGTTCTCATCACTGGAGAGGTTCGT
GCCTACCATAATTTGCATCGCCTCATGAAAGGCCAAGGTGTGCTTCCCATCAATCGAGAA
GATGGCAGGCATGAGGGTCGTCTCGTCCTTCCTTACCGGCATGAACATACGGGCCAGGAA
ACTACCTTCGGCCACTTCATTGGTGTAACGCAATCGGTCGGCGTTGGAGAAGTATTCATT
GCCCCCTTCCTTCACGTCGTTGAGCACGTCGTGCCCCCACAGCGGCACCGCCATGTACAC
GGAGGCGAGATAGTTCTTGCTGAGATGGCCCCGAACCGTGTGGGTCGGCTTCCCCTGCCG
CCAGCAGCCGACGGGTAGCCTCCTGTCGTACCGCAGGGTCCTGCAGGAACTCAGCCTTGA
CGACGGCGACAATGACATTTACCAGCTCTCGCATTCCGAGAGTCTTGGGAAAGGTCGACA
GCACCGCTTGGTGGGGGGTTAGGGTGTGCGTGTACTGTACCCGCCAGCGCCAGTCCCAGC
CAGGGGTCAGCACCACCCCAGCGTGTAGCACAAAGACATAGGTCTCCCCACGATAGAGGG
TGAACAAGGCGTGCAGCAGGGCTGGGCGGGCACTAAAAGAAAACCGACTGAACGTCTCCC
GCTGTGCTCGTCGCTTCTCCCGGTAGAAGGCACCCTCCGCAAAAGGGGAGTAGGCCTTGG
AGCGCACCGCCACCGTGCGGTCCACGTGGGTCCCTTCTTTTTTCTTATTCTTGTCGTTCA
TCGTCGGCGGCTCGGTAGTACTGGGGGCCCCTCGTAACGGGAACAGCAAGTCTTTGGTGC
GTATATTGTCCTTGTAGCTAAATGACAGGCGCTCCTCCTGCTCTGGGGACACAAAATCGT
CCGGCAGGCAGGAAAACACAAACGACTGATCAAACACAAACTTCTCGCTGTTGGTGGCAT
CATAGTAGTGCTCCAACTTTTCATTCAGCGTATACTCCGACGGCGACACGGACGCCTTGG
GGTGGTAGAGCTCTATTTCTAGTACGCCGGTGAAGACCCCCTGCCGGCCACCGTGCATGA
CGGTACAAGGAACGCACCGTCTGGGCACACTGATTCATGGAAGAGCGTACCCGACTGGCG
GTCTCGGTAGGGGTCTGATCCCTACTGGACAACACCCACTCCACCCAGCGCGTCGGGGAC
GTGCACCACAAAGATGCTACTCTCCAGCCCGTACCCTCGCCTCGTGATCGCCGTGCTATC
CCAGAAGAGACGCGACCGAGTGGTAAACTGGGAGTACACCTCCTGCTGCTCTCGCTCCGC
CTCGGCGTTAAACCGAGCGAGCTCCCCGATAGACTTTTCCTCCTCGCTATCGAGCGCATC
GTAGAGGTTTGGGTTCATGGACTTCTCTAGTCCTGCGTTGTAGCCGGTGAGGGCCCGTTG
AGTGGGGAGCTGGTAATGATAGGAGAGCAACTCCTCCGGCGTCACGCCCTCCTCCGCCTC
GTCGCGTCGCAGAAACGCCTTCTTGTACTGTTTTTGCTCCTTTTTCAAAAATTTTAGTCG
CTCCACTACGGATTGAGCTTGTGGTACCTTACTGTTCGCTGTCGTATTGGTCGTTGTCTT
CTTGTCTGCTGTGGAGAGGTCAATCTTTTCTTTGGTGGCGTACGCCCGCAGTGCGTCACG
GAGGGCGACCAACTCTCCCTAATATCTCTATCCAGCGGCACGGTGGGCTCCGTTATGCTA
CCACCCTCCCGTGGGGGTGGGGTAGAAGTGGTGGTAGTAGTAGTCGAGGAAAGCAAACAC
AAGGTACAAGATCAGCAGCAACACCAACGCGACTAGGATCGGTATGGGAGAGAACTTTTT
ACGTCCCAGCGTCTTTTTCGACAAACGCTTTAGTTGACGCATTTCCTATTGACTTTTGAT
CAATAAAGATGAATGAAGTTTCTACTAATGAAAAGGAAAAACAGATGTGGGAGAGGTTAT
GAATGCTAGTCAACGGTGAACACATGTAAAGAAGGTTCACGGACAACTCTTGGTAGTGTA
GCATTTGTTGGTGTTATTGTTGTTTTTTATTACTAGTGAAAGCACAATACAGTAAAATGG
TATTAAGTGGTGTATCAGTGTTTTCTCTGACAGAAAACAAAAATAAAACGATAATCTCCT
AACAACACCCACCGGTGTTTTCTGTTCCCCCAGCTTGACGGGCGGCGTCGGTCTCCCGCA
TTGTGGAGGGGGTCACTAAAAATGGATTGCTGGTGCGATTCTGGCTCGCGCTATTGTTGC
CATTCCCGCCGGTGCCGTCACCGTCCTGGTCGGTGAGGTCCGGCGCAGGGAGAGCGGCCG
CTACCTGCCGGAACATGGCCTTGATGCCAGCCCCCGTCTTGGCACTCACCTCCGTGAACA
AACAATTGTACGACTCCGCCTTCTTCTGCGCCTCCTCCGCGCTGACCTCTCGTCCATCCA
CGGCGAGGTCCTTCTTGTTACCGACTAGCATCACCACCACCTCGCTCCCCCGCTCCGCCC
GGACGTCGTCGATCCAGCGGAAACTACTGAGGAAGGAGTCGCGGCTGGCAATGTCATACA
CCACAATCGTTGCGGCGCTGTTGCGGATGTAACTGGGAATCAAGGAGCGAAACCGTTCCT
GTCCGGCAGTGTCCCACACGTGCAGCCTCGCGTTATAGGCGACTACCTTGGGCTTCTGGC
TGGCCGGCTCGCCCTCTGCGGTCTGCCGTACCTCCGGTGCCACCTCCTTCTCCATGTACA
CCGTCTTGGAGGCAAAGTCTATCCCAATGGTGGCGTTGTACTGCCCCTCGAAGGTGTCGT
ACATGAAGCGGGTGATAATGCTGGTCTTACCGACGGACTGGTCCCCCAGCAGCACAATCT
TGTGCTTGACCGAGGGTAGGTCGGGGGTCGTAGACTGATCCATCAATCGTATAAGAAAGA
AAAAAAAAAAACTTCAGAAGAGAAAAATGGAAAGAGAAGGAATCATGAAAACGAACAAAC
TGGGTAAAGCGCATACAACCTCTTCATGTAGTGTTCGTTAAAAAAAAAGCAAATGATTCT
TCTTTTGTTGCCAACATGTCTATGGTAATACGATGACAGGCAGTATTGTATGGATTATTT
ATAATGTGGTGTGTTATTATTTCAATGTTTGTATTAGTCCTGTTCCGCCGCATACTTTTG
CGCTAATTTCAGCAGGAATTCTTTTATCCGCTGCCGTTGCTGTCCCTTCCGATGTCCTCC
GCAGAGCAGAGAGATCTGTGCGTGGAGCTCCTCGATCTTCTCGTAAGAAACGAGTTGGGT
GCCGAGGAGCACTTCGCCGAGGTCGGGGAAGAAACTCAAGTAGGGCTCACTAATGCGGAA
GGCTAGATTCTCCCGGTCAGACGGGAGGAGGTTCCGCGTCACGACGTGCCGGACGAGGCC
GGCAAACAGGATACCACGTATGTTCTGTATCGTGCTCACCAGGTCTGGTCGGTCCCCGCC
GAGGGGCATCTCAATTTGAAAGAACTCCATCAGCGCGAAGGAGCAACCCTTCTCGTCAAT
GTGCGTCTCAAAAAGGAGCAATCGTCGTTTGGGCGGCGGCCGCTAACAGCTGAGGGTCCG
CCTGCCACCGTGGTTTATTCTCCAACACTTGTGTCCGCATGAAGGACACGACATCCCGGC
AGAGGTAGAGCCACTGCTTGGAGAGGAAGATGTCATTGTCGGTGACAACCACATTCTTCT
GCTGGTTGGGGACCTCTCGCTCCGCCGCCGCCCGTCGGTCCGCCTCGTGACGGAAGTAAT
CGTTGTAGATCTGCAGCACGCCCCTCAGCACCTGTGGGTGCTCCACGGATACTTTATCGA
AAAACTCTTTTTTGAGGGTGCGAAAGGAGGGGACTGGGATGTTGACGCAGCGGTCGCAGA
GGGTGCGCAGCAGGTCCAGGCAGGTGTCTGCTTGGAGCACCCCACAGAAACCCCCTAACA
GCTGGAACACGGCTTGACGGATGTTTACCAGCGACAGGCGCGCCGAGTTGACGTACTTGG
GTTCATTCCGCCGTGCCAACTGGTTCGCCCCTTCCCTCGTCTGCTCATGGACCGTAAGAA
CGTCGGCATACTCTGGTGGAAAGTCAGCTGGTGTCAGGTCATGAAACCACGTGATCAATC
GCATCAGGATGGGGGACATCTCCTCAATGAGCTCGACGGTAAAGCGGGTGGGCTGTCCGC
CGCGGAGAATGGACACCATCGTCTCGAGGGACCCTTTCAGTGTGTTTCGATCCTCCCGAC
TGTCCTTGGACGTCCCGATCAGCATATGGCAAAAGTCCTTTCTGGTCGTCTTGTTGACGA
GCTTCGTCAGTATATTCGCGAGCGGCTGCAGCACCGATCGCAGGTAGCTGTCCCGGGTCC
CCTCTGGGGCGCTGTGCAATAACTTACTCATGGCCTCGTAAATGAAGTTGGCCTCAAACC
CTTCGAGACGGATAATCAACGCCTCGCACTGCTTCACCACTTCCGGTAGAAAGGTGACGA
CGTTTTCATTATAGTTCGTACTGATGGACACAAACAAAGTGAAGGCACGACGGCGGGCGG
CAGCTTCATCGGGGTCGATCGGCCCACGGGGGCCGCTCCTCCGACATGGCCGCAAAAATA
ATATTGAGCGAGGTCGGCCAGATCAAGGGGTAGTACTGCGTATAAGGACACTTCCAGAAC
GGTAGGAGCATATTGTAGAAGAGTGGCAGCAACACCGCGTCCTTGGGTACGGATGACAGC
AGTGCCTGGAAGCATTGGTCAATGACGTGCGGGCTGTACTTGAAAGACTCCGACAAGTGG
TCCACCATATAACAGGTCGTCTCCCACTGGAGGTAGGTGTCGCTCTTCTGGGTGACGTGC
CCCGCCTGGGTCCGTGGGTCCTGGGGGGTACCCGCCGGATCGGGTAGTTGACTTAAGGCG
GTGAGAATATACTCATTCACGTCACTAGGGAACTTGACCGCGATCTGCTCCAACAGCTGC
GTGGCATGGTTTCGGAAGCCACCAAAGGTCATGGTGTAGAATCCCTTCACTACCACACTG
CTCCTCGGTGAGGTCGACGCCCTCCTGAATGGTTCCCAGCGTCGGGTGGAACTGATTCTT
GGGGAGCAGCAGACGGATACGCAGGAGTAGCTCCCCCACGTTAATATGGCGTAGTACCTC
CGGGTCCAGCTGGATCAGCACGCCGGTGACGCGGTCGGCGAAGAGGATGCTGGGGATGCG
TAGAATGTGTACCAACGCCTGACCGAGGAGCACCGCACAACTTTCAGAAAAGGTCTTCAA
CGGCAGTTCCTCCAGCAGGTCGATGATCTCCGACAAGAGGGGGATCTCCCGCCGAGCCAC
ACAACTCTCCGTGCAGCCAACCATCGCCACTAGGATACGAAGGAGCGTGTTGGTGGGGTC
CACAAAGGTAAAGTCTCCACTCCGTAATACCGTTGCCGCCGCGTTAACCGTTCCTGCCCG
GGCCGGCTGCCACTTCACTAACGTCTCAAAGGTGTCTGCAATGTACAGACGCGCCAACAC
GTCCCCGTCGCAGTGCGAGGCGAGCAGTCCGTAGGACGACAGGATCTGCTCCACGTTTGC
CTCTATCCCTGGTGGGTATTCCTCTATCGACGGGTCCCCAGCGACAGTGAAGTACCGGAA
CAGCGCCCCCGTCAGAACACTTAGCAAGTAGGGCGCACACTTCAGGACACACCGCTTCAG
CACACCCGTCTGGTTGGCTGGGACACGGTTAAAGTCGGGAAGGAGAAAGGCATGCACCAT
CGTATGGAGCAGTAGCACACTGGTGGAGGAGTCGATGAGGTGGGTGACCGCCGCCTGCAC
ACTCTCCGCCGTGTACACGGACTGTAGATAGTCTGTGGTCGGTCCGTTTCCTTCCCTTCT
GGATGGTACCACGCGGGCCACCACGTAAAGAAAGAACTCATCCAACACCGCTGGGCGTTG
GTAGACGACGGCGGCAATAATCAGATGCGTTAGATCGGAAGACAGCAAGTTGTGCATGCC
CTTCTCACTCGCAAACCACGAAATCAGCTGCGTCATGGGAAGATCATCGGGGGCTATCTT
CTCTTTTCGCAGGGCATTGGTCAGGAGGACCGCCCCGTACGATTGGGAGGCAATATCAAT
CTGATTCGCCTGCAATAGCGCCAGACCAATATCCACACACTCCCGTGCGCTCAGCCGTGC
CTCAAAGGCCTGCAGCTGGGTGGTGGAGTGACTCCGCTGGGCATAGGAGATCTCGGGGCC
GTTGTAGTACACCATCCGCAGCAGTTCTACCGCCGTCTCCACCGTCGGGGGGAGATTGGA
CTGGTTCATGTAGATCGACAACAATATTGGATGTTAATGTGTTTTCAACTAAGAAAACAG
ATGTACTTTGGAAAGAGGGGGAGGAGGGGGCTATGGATATCGGCATCGGGGATAGTTGGG
GTAGAGGAGCAACCACAAACATCTCAGAACACACCTGACTCCACTTGAATATGAATTCAT
TAAATATTGTGAAAAACACCACACGAAGAAAAGACATTCTTATATTACTTTTGTTTCTTC
ATATCCTCCTGCTGCCAGGTTTCCACATTTTTCCTAAAGTCAACGACAAACTCATCGAAC
TCATGACGGCGCACATCCTTCTTGGACATGACACTCTCGTACAAGTGCGTCTTGCAGGCG
AAGATCTCAATGATAGACCCGAGGGTGAAGCCCATCAGGAATATACCAAACATGCGCACT
GGGAAGGGGTATTGACGAAAGGCCTTGACCACTCGACTCGCCCGAGTGCCGTCACGGAGG
AAGGGGTCCCTCTTGGGGCCACGAAAGACATCCTTCTCTCTAGTGATTCTAGAAATAGCA
AACATTGCTAAATAGATAAAGTGGAAGGGGAGAAGAGAGTAATCGTTCATTCGTAGAGGA
ACTGTATGCAGCTGCTGATAAACCACAAAACATCTCAAATAAAAAGAAAAGATTGGTGAT
TACAATTATTATTATTATTATAAAGGTTCATACGGCGCACATATTATTTTCGGCACTATC
GCTTGCCCTTCTTCTTTCCACCCTTACTCTGATTATTATTATTGTTATTGCCTTTGCCTT
GACTATTTTTATTACCTTGCTTCTCATTATTCTCCTCCGCGGCAGCATTGGGCTGATTAT
TATTATTCATGTTATTGTTGCTCGTGGTCGCTGCCTTGGCCTCGGGGGCAGTCACGCCCG
CCGTGCAGGCCGAGACGAACTCCTGTACAAAGGACTCCAGCGCAGAGAGCTGTCCGTAGT
TAGAAAGGCTGGTGGTTAGGGTGGAGGTACCGTCGGTGCTGCGGAGGACGACCACCTTGT
GGCCACGCTTCTCCTGGGGGCGTACTTTGATTTGCAGTCGGGTCCGCGTCACCCCAGCGC
GACGGGCCTGCATGTTGCGCGTGTACCTTCTACAAAATTCTCAAAGTCTAGCTTCATCGG
TACGGTTTATTTTTAGGAAATACTTTCAGCTAAAAAAAAACAAAAGGAGGGAATAAGAGA
TTAGATTTCTTTCCAAGAAGAATCCAGGAAGGGCGTACAAAAACATACTTTATGTGGGTG
TGGTGTACAGGTTTGTATGTCACAACATAATAGTGATTTCTCTACATTACTCACAAGAGT
ATTTTTTTTTTTTTTTTTTACCTGTGGCGCTGTTCATTTAAAAATAAACACAAATGAAAT
AAAATAAATGAACATCATAATAATATTATTCCGAAAAAAAAAAAAGGAAGGGTTTGCTAT
GCTATGGAAACCCTCCCTCTTCCTTTAGTCCTCAAAATCATCTTCGTATTCCTCCTCCAC
CTGCGCGCCTGGTGGAGCAGCCATGGCGAGGTTCCCGCCACATCCTTTGTGTGCACACTG
CGGTAGCGTCTGCTTCACAACGTCGGCACCAAATACCTCGGCATACGCCGCATGCTGCAA
TACATCTTGAGGCACAAACTTCAGGTTGGCCTTAAAGTAGCCACTCCGCACCAGACGGCG
GGCGGTGGGGCGGACCGCGGGGTCGACGGTGAGCAAGGACATGATGAGGTCCGTGAGATC
CTTGCTGTAGTGCTCCGCCACGCCTGGTCGCTCCCGCAGCGGGGTGCAGCGACCCTGGAC
GATCTGTGTATTGAGGGCGCCAATGTTGGTCGAGAAGAAGGGCTTCTCCAAGGCCACGAG
CTCGTAGAGCATGACGCCCAGACTCCACATGTCCACCGCGTAGTTGTACTTGCTCTCCTT
GAATAGCTCCGGTGCCATGTAAAAAGGGGAACCACAGGCCATCTTGGCAGAACCACCAAT
ACTGTCAAGAATCGCGGAAATACCGAAATCCCCGATGCGGCAGGTCACCTTATCCTCGAG
GAAGAAGATATTTTCCGGCTTGATATCGCGGTGGAAGATACCTTTCGAGTTGTGCATGTA
GTTGAGTCCCATGGTCACCTGAATCAGCACGGATGCCACCACACTCTCGTGCACCATGCG
GTTCGCCGTCTTGTGCTGCTCTATCATGTGATTCAAGTCCCCACCGCTGCAGAACTCTAA
GAAAAGGTACATCATCTTGGTCGTGTTCGCCTGATCAATATAGTCCACCAGTTGCGTGCA
GCTGGGGTGGCCGTCTAGCAGTTTCATCACCTTCACTTCATTTTCAATATTCTTCATTTC
CTCCACACGGTCCACCATGGTCTGCACGTTAATGTCCTTCACCACCACCATCGGCCGCCA
CCGCTTGTTCGCCATGGACTGACGATCGTTCTGCTTGTACCACGTGGCACAGCCGAAGCT
GCCTTTGCCTAGAATCTTCACTCGCTCCAGCTCCCACCGCACCCCAGTCTCCCCCGTGAG
GCTCAAGCGCTCGGCAGAGGAGAGCGTCACTGCCGCGGGTTGGGTGGTCGCCTTAGTAGG
GGAGGGTCCGCCCAGACCATCCAGAAAGGAGGGGGCGGTGGTGGTGCTAGGGCCGGACAG
GAACGGCGGGTTGCTGTCGTCTAAGAACGAGGGCGCCTTGTTAGATGGCCCGGCGTCGTC
GCCAAACATCATCTTCTCAAAGTCACTCATTCGAATGGCGATGGAAATATATCAGTGTAT
TCGCGAATTCTTATTGTGGATAGAAAGAAAAAAATAAGAGAGGGATGTATGGGTATGCCG
CTACACTGTGCAGCTAAGGTCAGTAAACCAACAGAAACAAAGCAAGCGAAACGCATTGTT
TTTTTTTTTTTTTTTGACTATTCGTTATTAATAAAATTCATGCTTAATGCAAATACTTAC
AACCTATAAAATTGGAAAAAAAAAAAACACGGATACTGTTGGTAATAATACATCAATATC
GTTTGTTCTGACGGAATAGTAAACACATATTAAAAAAAAAAATTAGTGGGAAAAAAAATT
AAAACCTAATAATAAATAAAAATATTAAAAAAAAAAAAATCATGGTGGTAACATATATAT
TATTGTTAGTTCAATGAAGAAGGGTACTATTCCGAATCTTGTGCTTCTTCTGACGCCTCT
GCTAGTGCTTCTTCACTGACTCGCATAAAGACCTGTTCAATCGTCGTCTGTGAGACGCTG
TAGTCCGAGATCCCTAGGGAATCCTTATCGCGCTGCAAGTGGGCGAACACCTCGGACAGG
TGTACCGCGGCGGGTAAAGTGTACACGAGACGGTTACCGCGTACTTCATTCAAGGTACTC
CACGGGATGGTGTTGCTGACGTAACGCATGACAAACTCCTTGGCGGCCTCAAAGGATGGG
GATCCCTCGGGCACGAGAAGGCGGAGGGACATTTCAAACCCGCTACCAAACTTCTTCTTG
AGGTGCATTTTACTGCCGATGCAGCGCATCCTACCGTCTACCATAATCGCGACGCAATCC
GCCAGGGCCTCGATCTCCTCCAAGTGGTGGGTCGTGAGCAGGACGGAGCAGCAGTGGCTC
ACACTCTGAATCGAGCTCCACAGCCCGCGGCGGGCGACGGGGTCCATGCCAGCGGAGGGC
TCGTCCAGCAGTAGCACCGGGGGACCTCCAATGATACTCAGGGCGAAACTTAGCTTCCGT
CGGTTACCCCCACTCAACGCCGCAGACGTCACCTTGCGGTACTTTCCTAGGCCAGACAGC
TGCAGGAGCTGCTCAACCAGTTCGTCCTGCTGAAAAGGGGCGACACCGCGTATGCCACAA
AACACCCGCAGGTGTTCCTCTACCGACATTAGATCTAGTGTGGCGTCAAACTGCGGACAG
TACCCAATCGATAACATGGCCTCATTACTGTCCCTTACGGTATCGTAGCCGCACACGGTC
ACATTCCCGCTCGTCGGTTTCTGCTGCTGGCACAAGATGGAGATCGTTGTCGTCTTGCCA
GCGCCGTTGGTTCCTAGCAGGCCGAATACTTCGCCGGTTGTCGTCCCAAACGTCAAGTCG
TCTACCGCGTTGATCTGACGTTTCTTGCAGCAGCCAGCGCTAGTTTTGAAGGTCTTCTTG
AGGCGTCGTGCCACGGCCGCGTAGCTGTCCTCCTTCTTCTCCTTGACGTGCTCCTCCGCC
CGTTGCACGTCACTGTCAACAGAACTTCGCTCGTCACCAAAGGTAGACTCCACGAAACTG
GAGAGACTCATCGGGGGGTCGGTAAAACTAGGAGTCCGGCTGAATATATGATTCACATCC
TCGCTGTTGTCAATGTCCTCCTCTTTCCGTCGGCTACACCAGCGAGAGATGCAGCCACTG
TCGATGATGAGCAGTACCGCAATGAGCACGGGTATCTCGGCGGACATGTAGATGATGTCA
TACAGCGTAATATCGAGGGACCAGCGCGTCTGCGTGGGGTCCTGGGGCGCGAAAAAAGTG
GAGAAGATGTTGAGGTTGATGATACCCTCCGTGACGGCAAAGTACGGGCTCACCCGGAAG
ATGAACCGCACAATCTTGGAGACATTCCCCGACTGTTGCAGCATTTCCAGCACAAAAGCG
ACAATATTCATGACGAACCCCGTCAGCAGGCCGAAGGTCATGATGGCGATCTGGGAGCCA
CCGGGGGAGGAGAAGAGGAAGCTGGCGCAGTAAGAAAAGAGCGTGCCGACAAACCCAAAG
ATGAGGAACACGACGCAGCAAGGCCCAATCGCGTCCTTCCCGACCAAGTCCTTCTGACTA
AAAATGAGAAACAGTAGTATAATCAGTATCGTCGACACGAGGTAGATGGCGAGATCAAAC
ACAAAGCTGCCGAACCAGTACACGAGAAAGTTCAGTCCAGCGAGTTTCTGCAGGTGGCGG
GTCCCGTTCGCCCTCTCCCGGACAATGTAGCTGATGCAGGAGGTGTGGATAATGTTGTAC
GGAATCATAATCAACACACCGGTGACGAATATCTTGAATACACCGGATGCCTTCTGCTCG
CTCTCCGACTGGGGTAGTGTCACCAACGCCGTATCAATGCGTGCTTCTGGGCGCTGGGAG
AAGAGGTAGTAGTTGTACATTTCCTTGGTGGAGATGGCCAGCTCGAAGTAACTACTGGTG
TTGTAAAAGAGGGTGACGGGGTCTGACACGCCGGCGTAGACGAGCTGATCGGGCCCGTCA
TTACTGGTAGGGCACGACACGGCGCCGTAGCGGTCTAGCGAATGGCTGTCGCGGGTGTCG
GCCAAGTAGTCCCACACCTCAAAACGGTTAGAAGTGGTGTCCCCAACGTCCGTCAGCTCC
ATGTCGTAGTCGCTGAGGTAGTCCGACACGGCGCTGTAGTTGAACAGCCGCTCGCACCCA
GACACCACGAACTCGCTTCGGGTGGGGTAGTGGTAGTCGAGATTGAGGGTCTGCGTGGGC
TTTGGTCGGAAGGAAAGCCCCAGGAGCATCGCAAACAGCACGAAAAAGACAGGGGACACA
ATCTGGAACCACATCATGGTCGTATCGCGGCGGCAGTAGTACAGGCGCTTGAGAATGCTA
TACTTGAGCTGCTGTGCATACAGGGAACAGCCTCGCGGTTTCACCTCGCAGTCGAAGACA
AGGTCAAAGTTTTTGTTCGATGGTTTCAGCATGTTCAGTTCCTCCTCGGTGAGGGTCTTT
GACGTAACGTCAATGAACACCTCCTCCAGCGAGCTCGTCGCCACGCTGAACCCCTTCATC
CCGTAGGCCCAGCTGTTCTCCTGTTCCAAGCTACTAAAGAGACCAGGGAAAGAGTTTTCT
TCGTGCTTGGGTACTTGGTACGTCATCTCCCGTCGTGTCATGTCTGTCAGTCGGCTGCTT
GGTAGGCACTGGCCGATAAAGGTATTGAGCGACTCCACGTCCGTGGATTGGTCCACCGCA
AGGGTGAGGTTGTACCCCACGCCAAGCCGCGACTTGAGGTAGAGGGAGCTCCCACTGCAC
ATCAGCCGTCCACCACTCATCATCGCGATGCGGTCCCCGAGGAGGTCGGCTTCATCCATG
AAGTGCGTCGTCAGCAGCACGCTGGTGGTTTCCGACATGCGTAACAGTAACTCCCAGGTG
TGGCGGCGGGCCGCGACGTCGAGGCCGGCGGTGGGCTCGTCGAGGCAGACCAGTGGGTTA
CGTCCGACGAAGGCCACCGCAATTGACAGTTTACGCTTCTGGCCGCCGGACAAGGCCCCG
GCGGGGTACTTCTCCTTCGCCTCGAGGTCCACCTCCCTCAGCATCCACCGGACAGCAGAC
TTGAGGTCCTCGCCCTTCAGTCCCTTGATCTTGCCGTAGAACTCCAAGTGCTCGCGACAG
TTCAGGTCGGGCCACAGAATGTTATGCTGTGGGCAGAACCCCAACTGCTGTCGCACCTGG
CGTAGTTCACTTCGTACCGAATAACCCGTCACGCGGCACTCTCCCTCGCTGGGGGGCAGC
ATGCCGGTCAGCATGTTCATCAGGGTACTCTTACCAGCACCGTTGTGGCCTAGCAGGACG
GAGATACCGCGTAGTGGCATATCCCAGCAGAAGTGATCCACCGCCGTGAACTTCTTCCCT
CCCCGCTTAAATATCTTGCACAGACCAGCAATGTCGAGGGCGCGCTCCTCCAGTGGGATG
GCATCCGACTCGAACATACCGTCCCCGTCACGGCCGTCTTCGGTCGACTCGGCGTCGTAG
CGCCCTTCTCTCGCCCAGCAGGATGGGCAACACGCAGGGCAGCAGCGGTCGCGGAAGTAC
TGAAACGGCTCCTTGATAAAGAACAGGGGATGGCGGCGTGTACCCCACTGCTTGGGAAGC
ACCGCATCCAGGTACAGCATCAGCAACGAGTAGATGATAATGTCGGCCACTAAAAAGATG
ATCAGGAAGACCGCGTGGGGGTCCACCAGCGGGGAGTACAGGTTCTTATTCCGGAAGCCA
CTTCCCAAGTCCCAGCGGAGCAACATCTCGAACAACGCACCGAAGCACGACGGGGAGAAG
ATGGAGATGCCGAGAATGATGTCGGGGGTCATGTTAAACACCAAGAAGTAGGGGCACACC
AACACGGCGTAGGCGACGGGGGAGAAGATGGACACCACCGTCGCTGTGTTGAAGAAGGAG
GCAAAGATGCCGGCGAGGGGCACGACCGAGAGCCCGAAGAGAAAGATGACGACAAACACG
AGGAAGAAGTTGCTGTGCTGCAGGACGCCAAAGTACAAGATGATCGTAATTAGTACAGAG
GTCAGAAAGATGAGGAGCACACTCTCCACGACCCACGCTGCAAAGTTGATATAGGGGTTC
AGTCCCATCACCTGCATCGCCTCGGTCAGCCGCATCTCCTTATCCATGACGAGGTGCCGC
GCCATCTGGGTGACGGGGTAGAAGAGGAAGAAGGAGAAGAAGAAAGCCGCGAGGTAGGCG
GACACGGCGAGAAAGTGCGGTTTTTTCGTTCCCCCGCTATACATGACGACGGTAAAGAGG
GAAAAGGTCGATTTGTCTTCGGCGGCCGCCGCCATGTAGTCTGCCTGCGCCTCCTGGCTC
ACAATATTCTCGATGCCACTCACGTAGTTACCGGTTTTAGGGTCGCGGTGCTCGAACAGG
CGTGGGTTGGGTGGGAGGACACGGGTGTAATTGTCAATCCCGGAGTAGTTCTTGTGCTGC
AGGTAGAACTGATACACCAGCTGCTGCAGGGCGGAGGTACCACTGGCGAGGAACACTTCG
GCCCTGTCATTCTCGTACCCATCCAGATATTCATAATCTACATTCTTCTGAAAGTCTGGG
AGGGCGGACTGGTTCATGTGCAGCTTCAGGCTGAGCCCTGTCGAGTCCATCTTCTCAATC
TCCACCAGCGCCATCGTGCGGCCGTACTTGTGCGACTGGATCACCTCCTCCGCCTCGGCG
ACGGTGTCAAAGATAAATCGCTTGCGGGAAAAGACGTACTGAAACAGCTTGGAGTAGCGG
TAAAAGTAGTCGATCAACTCGTCTGGGATGTTGGCCTTGGGGGCAAACATAATATTACCA
TTCGCCTGAAGGGACGAAAACGAATTGGACGAGGCGAGTCCGGCGGAGGAAAGAAAGTTC
GTGGCGGCGCCGGAGGAGCCGGATACTAAACCAGGCACCGACCGCAGCAGCCACTGGAAG
GCAATCACGTTATCAAGATTGTCCAACCGGGAGAAGGCGGCAATGTTATAATTGACGAAC
TCGGTGACCAACGGGAAAACGCCACATAGGCCACGCAGCGGGACATTATCTTCGTTAATG
GGGTACTTGGACTTGTTCTCCTCGTCGTCGACGTCAAAGTCATCGTTGAGGTAGCTGTAG
TTCAAAAAGTCAAAGTCATACTGCCCTGTGGTGGAACAATTGATATACATATCCTCGTCC
CCCGCCTGCCCAGGAGCACTGCTGCTGCCCGCCGCACTACTCGCCTCCTCGCTCGTCTCC
TTCGGTGGGTCCTTCTTCTTTCGCTCCTTGCTGCCCTTACCGGCATCCTCGCTGTCGTCG
TCTGGGGAAGGGCTAAGAATGAGGGCGAGGGTGTCTGCGCAGGTGGGGATACCGTCGTAG
AGGGTGGTATTACTACACAGACCAAATTGGTAGAAAAAGTCGAGCGAATTGTGATTGTCC
TCCTCGAAGGACTTTTTGGGTTCAAAAGAGGTCAGGGAGGCGGTCTTCTCCTTTCCAAAC
CCTAGGGTCAGCACCAGCAGGATGAGGGCAAAGATGACTGGAATGAGAATCTCCAGCAAC
AAGCCCACCCAGCTATTCCGGCGCTGCAAAACACGGCGAAGCAGGCAGGCCTTGAACTGC
TTCCAGCCAATGTGCCGCACATCGCGGTCGATGACGGAGACCTCGTCCTCGTATCCCTCC
TCACTGATGGTGGACTTGGTCGCATCGGTAGAGGAGGTGTCGCTGCCAACGTAACTACCC
GTGAAGCTGTTATCAAGTTCATACTCGTATTCATATCTACTGGATGAAAGAGCAGATGCT
CGTAGGGGGTTCGTGGCGCTCATCAAAGTGGTGTGTGTTTGGAGAAATATATATATATAA
TAATAATGGGACGGGAATAATAAAAAAAAATTACTTAATTAATTAATGGGTTTACTTTTG
TGGTCGAAAAATTATTATTGTATTTTTCGATATTTTTATTTCCGTAGTTTATCGGGGGAT
TATATTAAATATGAATAGTATAGTTAAAACTCAAAAAACAGGTAAAAAAAAAAATATATA
CAATAAATGCGAAGTTTTACACACGCGGAACAAACAAAAAAAAAATGAGGGAAATAAATG
AATCAACAAAGTTTTATACAGGGAGGGAAAAAAAATGGCCCAACCACGTACAAAAAGTTG
CCTGTGGTTGAGAAACTGTGGAATAATAAAAAAATGAATAAAAAGAGAGAGAGGGGAAAA
AAATTCTAAAAAGAGGAAAAGGGAGGGAAAGGGATGAGTTGTTCTTAGAGGAAGGCACCA
GAACAGTAGAAATCCAATTGGGGTTAATCAGACTAGTGTTTTAAGTTTTTGTTTTGTTTT
GTTTACGATTATTAAACAATATTATTTTAATATTACTCGAGAGGAACATTACAGCAACGG
AACGTGTCAAATATCACATGGCACGCCTTCTCCGCTAGCTCTAACACCGCCGTGCGGTCG
GAGGCTCCGTGTGCGGGGGTCAGCGGTGCCTTCACCGGTCGCTGATGGTAGGCGACGAGT
CCACCGCCGCTGTTGGGGTTGGCAAAAACACACACGGATGTGGAGACGGTCTGAAGCGGA
CCATAGGAGGTGCCGCTCTGACTAGGGTGAAGGTCGTTGATCTCCTCGAACAGACTATCC
TCTTCTTCTACGGTAGGATCTAACCAGTAGGACGTTTTGGTCTCCACGGTCTTGCCTTGC
CTCAGCTGCCCCTCCACCTCCGCAAGACACACCGCCGCGATGGTAGTACGACAGGGCAGT
CCGCTATCGAGCAAGGCTGCCATCACCGCATTGACACACACCGCCGCCAGTGAGCCGCCG
TCCTGCAGGACAATCAAATCCAACGAGAGACACATTTTAGGAAACCGCTCCGCCATAAAG
GCACAGTGGACGGCGTTTAAGCACAGCTGCGACACGAACACAGCGTACTTCTCGCCCATC
TCCGCCCGTCTTCGCTCCTGCTGGATGACCCGCTGAGCCCCGCCGGCGGCAGGGAAACTG
GTGGGGTTGATGCGGATGACCACTTCACACCGGTCTTGGTCCCTGCAGTAGTAGTTACTG
CCGCCGCCGCCCTCCTGCATGCCAGAGGCAGACGGGCCATGGACAGCGACGAGGACGGTG
GTGCCACCCTGCGCGTAGACGGAGCTGCCACCGAACTGGGGTAACTCCGAGAGGCGCAAC
TCCTTCCCGCGTATCTCTGTCGGCCGTCGCCCATCCCGTCGAATGAACTGAGCGACGGGT
GAGGAATCCGATTCCATTTTTGTAAAACTAGAAGCAGGTAAGAAATAAGAACGAGAGGAG
CATGTGATACAATATGCATTTCAAAGTTAAAGAATAGAAAAAAGAATGATCAACAAAATA
CAAAACGAGAAGGGACTACATTAATTCTGTGAAAAAAAAAAAAAACTCCTCATTTATTAA
ACGGTGTCGTACTGCACTTTACGATGCAGCGATCGTATGCGTATAGACGACTCCAATGTT
TTTCTTAAATTGGAAAACACATTACTTTTATGATCATTATCCTTCTCACTCGTCTCTCCT
TTATGGACGCCATCAAAGGCGGACACCATATCGATCACACTCAGCACACTTAGAATATCC
TTTTCTGTTAGGTAGTCCGCCAGTGCGCCGGCCCGCTGTCCTAGCAAAACATAAAAGTTA
GAAGAAGAACCCCTGTTGTTATTCGTCGTGTTTGCCTTGTACTGTGGTAAGTGAGAAAGA
TCGCCCTTGAAGTTTAGCATGGCATACGCAAGTAGCACCTGACACACCTCGTACCCTCGG
AGGAGGATGTAGCGATCGTCCTCCAGCAGGACACGCACGGAGGAGACGAGGAAGTTCAGC
GACACCTCATTCTCCAATTTATAAAAGAGAATGGCGGAGCACAATGAGGCAATGTGGTGT
ACGCTGAGATTGCTATTCTCCTTATTGTGCTTGGCAAGGTGGCCAATCAAGAGAGAGGTG
AACTCTTTTCCTAGGCGATACGGCACGCGTAGGGATAGCGCATCCCCGGATGGGGTGTGA
GAGACATAAAACAGACCCAAATGACCATTCCGGTGGTGTAAGCGGTGGTGCAACAAAAAC
TTGTAATGATAAAAGTAATCTTTCCCAGTGGACTGATCACTCGACAGGAAGGAGGCCCGC
ACCACGTCGACGGCGGCACTAATCGACAGACGACCGCTATTCTTATCGCCTTCGCCGGGG
GTGTAGAAGATACTATCTTCCTTGTGTTGATTCATGAAGTCTAGCTCCTTCTCCACCCAG
TACCGCAGACACCACTCCTCAATGGAAAGATGAGTGAACACGGATCCCTCGCCGTCTTGT
GCAAGGTAGCGAGAGAGGGGTGCATGCGGGATGTCGTACCGTGGGCTATCCTCCGGTGGA
AGGGACAGCACCGTGTAAAACAACCGTAGCACCGCTGAGTGATTGGGAGTGGCGTTAGCG
GTCAGCACGTGATGCAGTAATAGTTCCCGCAGTACATCACGCAGGACAGTCCGCAGTCCG
CTATTCTTAATAAACGTTTCCGCCTCCTGTGGGGAGACGGTGCCGAGACTTAACGTAGGG
GCAGCATAGTTAAAACGGGTAATGAACAAAATATAAAATGCAAACTGCTCCAGCAGCAAT
CCATCGCTTTTTTGATCGTCTTGTGTTTATCAGGTGGTCCGTGTAGGTGATAAGGGAGGT
GCCCCACTGCCTTGTAATGATTTGCCGTCAGGGCGGAAAATGTATTTTTAGTTGTCCCGA
CCGCTCAAACAAGAATAAATCCAAGTTGAATTGATTTTTATTATCTTCAGCGCTGTCGTT
GTGGTTGTTGGACTTCACGCGGTAAGGGGGCTAAAATACTATCACACTCCTTCGCGACGT
GTTTCACTATCTTGTACGTGTCTAAAAACTCTCGTTTTAATCGTTTCGATTGTTTCTCCG
TTAGCACGCGGTTTACATTTCTTCTCAACTCCCTCAGCAGTTTCTCTTCCTCTAATGCTT
CTTGTTGGTATGGGTGTGGTGCCGCCCTATGGAAGGATTCCTCTGCAGCTTCCTTCCTTG
GATGATGAGGGGATAAGTCGTGTAAGGTTCCGTCTTGCACTGGTAACGTACTATGATAAT
CACTCGTAGAAAGTGATTGAGGCCCGGCGGTGAAGGGGGCGTTCCGCTGGTGTAAGTACT
CGGAGAACACACTGGCGGCGGTGATCCCTTTGTTGGAGGTGTGAGTCGTTTTATTGAGCA
GAGCCCATACCTTCTTCATGATTTCTTTTTTTTCTAATGTGAGTTCTTTTTTTTTTTTGT
GTTGGAGGGAATAAAGACAATAACGGAAAAGGGATGAGTTAAACCTGAAAATGGGAACGG
CAAAACGGAATAGTGAAAGATTTTTCTAACACGGATAAAACACGAAAAAAAAAAAAAGAA
ATAATGCGCATTGCTCTTATATTAATAGGTGGAGAAAATAAAAGAAGCTAAAAATGTTGT
AACGGGTTGTACACGTTCTATTATTATTATTATTATGCTAACAAAAATCGATAAGTATTT
ATACCTGTCCAAGCCACTCTGTATACAGGAACTAAAACAGAATATACATGCCAAACTTTT
TATTTCTCATGGTATAATCATCTTTATTTATTTTATGTTGTTTTTTTGATTCCCCCGTCC
ACACGCCGGCCCACAAGCAAAAAAACAAACACAATAGAACAGGGCAATTAGAGTTCTTAT
TATATACAATTGTTATTATCATTATTGTAAAACAAAAAACAAAAACAAAAGCGAGGTGTT
TCGTGGGGGGGGGACTACTGCGGTTGAATACGATTGGGGTACTGTCCATTGTTCTGTTCT
AGCGCCTCCCGGACAGGTGCAAAGTACGGGTGCTTCATCGCCTCGGAGGCGAGCGGACGG
TCTTGGAGGTCAAACTGCAGCATTTGGTTCACTAGATCGAGCGCGTCGGTGTCGCAGAAC
TCCGCGTTCTCCTGGGTGACAAACTTGCTCCACGGGACAGGGTCACGGCGGCAGTTGGCG
AGGTCGTCGGCGATGCTACGGAGGGATGGCGCCGCGGTACTTCTCCACCGTGCGGTAGAC
CACGCTGGAGCCAAAGACGTTGGCCAGCTTGAGGAGCTGATCCTCGTTGCTGCTGCCACA
GAAGAGCGGGTCGCAGCGGAAGAGCATGCCGGCCAGGACACACCCCACACACCAAATATC
CAGCGAGTAGTCGTAGTGGCGGTAGCCGAAGAGTAGCTCCGGGGACTTGTAGTGTCGGGT
AGCCACACCGCAGTTGAGGGCCTCACCATGGATGTAGTATTCGCCTAGACCCCAGTCGAT
CACTCGCAGTATCTTACGCTCTGCATCGATCATGACATTGTGGGGTTTGATATCGCGGTG
GAAGATACCACGGCAGTGGGCAAAGTCTAAACAGCGGAGGACCTCGTAAATGTAGTAGCG
GAGGTCAAAGTTGGTGAGGGTCTTGTTCTGCATCAGGGTGCGGAGGGTGACGGGCTTGTT
CACGTACTCGGTCACCAGCACTGGAGTACCGGTCCGCTCATCCTTTAACACATCCAGCAG
ACGGACCACGTTAGGACCACCACACAAGTTACGCAGGATAGAAATTTCTCGCTTAATTTT
GCCAAATCGCACCGGTTTTAAAATTTTCAGCACGCAGATGCAATTGTTGTCGGTATTCCG
GCACCGGAACACCTCCGAGTACTTTCCTCGCCCAATCTTCTGAATTAGCTCATAAGCGGA
GAGGTCTGTGTTGAAGTCAATGCGGGTGTCGTCGTAGTTCCAGTAACTACTAGGCAGGCG
GGAACAGATATACCAAAAAGGGTGTTCGTACTCACCCCGCTCATTGCGCGCACCCGACCG
CTCGTGACTGGGTCGTCTCAGAGCGGCAGTGTTCTTTTCTATCGCGTTAGGATTAGACAT
GGATCTGTTTTTTATTTTTATTTATATGAATTCGGTAAAACAATAAAAATAAAAATAAAT
AAAAAAAAGCTACTAAAAAAAAAAAAGGAAAAAAAGGGTGGGAGAGAGAAAACAGTTGGC
GAATATAGAAAAGTGCTTATTTCTTAAAATAAACCAATTCCTGGTGTAATCTCACATCAT
TAAAACTAATCCTTTACTTCTTAGATACACACGTAAATACGTATAGTTCTGCCTTAATAG
AAATAGAAAAGTGGAAAATCTCGAAAAAAAACCAAAAAGACGGCGCTTTACGTTCTTCCT
TTTCACATCCTATCTAAATACCTTTTTAAAAAAAAAAATGTACGTTACTTCTTCTTATCT
GCGTCGGCATCCACCTTCTTCTCCTCGCCATTCTTCTTCTTCTTTGCGTCCTCGGCGTCG
CGCTCATTTTTCTTGCGGTGTTCCTTTCGCTTTTCTATGTTTTCCTCCACCAGCGCGTCG
AACTTGCCACCGACCTTATCAAAGAGAGCCGTGACAAGGGTGTCGTACCCCTCCAGTGCC
TCCAGCGCATCTTGATAGAGGGAGGTGTTGAGGATCTTCTCCTTCCCAGCGGCGTCGGCG
GCATTCTCGTAAAACTCCATCTGCTTCTTCTTCTCCGCCTCCTTCTTGGCCTTCTCGTAC
GAGTCAAACACCAGCAGGCAGTTGTGACGCTGGTCCACAATCCCATCCAGCCGCTTGTCT
AGAATGAGCTTGGACAGCCTGGACTCAATCGTCCGCTCCTCTAACTGCAGCAGCTCCCCC
AAGTAGGCAATCTGTACCCGATTGTAGGGTTTAATAATACGCAGTAGGTGACGCTCCATG
AGGGTGTCGTACATCTCCTCTAGCTGTCGCCGGACCACCTCATCCTGGAGGAGATCCACC
TCACCGTTGGGGGTGTGGGTCTTGTCGCGCAGTCCTTGTAAAATGAGATTAAACTTGTGG
GTGTCCTGCTGACCGTAGGCATCCGCCACGCCGCGTATCGCATCCACATCCTCACCGCGG
TACTCTAGCACATTCTTGGAGGAGAGGAGCGCCTTGAGCTCGTCGGTCTGGTCGGTCTGG
ATCTTGGCCATCAGCATATACACGAGCGCCTTCCGCGCCAGTCGCGCCTGATCCCCCAGA
CCGTGGTAGCCCTCGAAACTCTCGTACAGGTAGGAGAAGGCGGTCTTGTAGTCGTACTCC
TCCGCATGGAGGACACCACTCTGCAGGTCAATCTCTGCCTGCGACAGCGGGGGGCAGTAG
ATACTGTTGGCCGTCGTGCGAGCACTGACCAGCGCCGCCTTCGCCTTCCCGGTGTTACGG
ATCGCGTAGTAGATTTTGGTTTCCAGAAGGTGAATATCTAAGAGGAGGTTACGGTCGTCG
AGGCGGCGCACCTCGCGGAGGAGCACAATCAAATGGGAGAGCGCCTCACGGTACTCCTTC
ATCTCAAAGAGCATCTCCACCTGCCGCAGCTGGAGACGCTGACGAAGGAAGGTGCGCTTC
TCGTCTCTCGCCCACTTCACATTCTCGAGGCACACCTCGTACTGTCGCTGGATGGGGATG
CCCCCTGCACAATAGACTCAAACAGCTTGCGGACCATGTTGGTCGTCTTTGCCTTGGGGA
GCAGGTAGAAGAAGGAGCGGGCGCTATACAAGAGTTGGATAAGGGCCTCGCCATCGTTGG
TGATGAGGAGAATCTCATTCAGGCGGTGGATGGACTGTTCCTTGGCACGAATACTTTCCG
TCTCGTCGGCGGAAATATTATTCTCGTTGATGATCTGTTCGTACAGTTCCTTCGCCTTGG
CACGGTCCCCTTTTGCATAAAACGTCTCGGCCTTGTCGAAGGTCGCCTCGATATCTACTG
CTGGAGCCATAGGGGATAATAATAATATTGGTTTAATAAAAACTAAAAGAAAAAAAAAAA
GTTAACTAGTGGTCTGTGTATATGTGGGTGATATACCTTTGACTTGAGGGGATAAGAAAG
GGAAGCGAAGGAGGTGTTTCGACAAAAAATGGGAGGTGAAAAACAACTCCATAACGACAC
AAAAACACACATAGAAGAGATGAAGGATTTTTATTATTATGTTTATTATTTGTTGGGTTA
CACTTTTTTCTTTTTCGTCGGGGTCTCGTTCGCGCTAGAGGCCGTGCTATGCGTAGTGGC
GTGGCCCTTCTGAGGCAGGTACGGTGCCTGCAGCGGTGGTTGTACTGGCGGCAGCACCAC
ACTCGCGGGGTCCCTATCGTAGTTCATATCGGCGTCAAACCCAGAGAGATCCCCACAGGC
CACAAACGGTGCTACCCACCGTATAGAGGCGCCTGGTGCGATGGTGTGATCCTCCACCGC
TAACGCCGTTGCCTCCTCTTCCTTGGACCGATAGGCTGGGGCCTCCGGAGTGTAGTCAGA
CGCCCCTTGCAGCGCCAGTTGAGCAGCGGTATTGGGGTCTGCTCGGTCACTGCTGGCTGA
CAAGTGTAATCGAGGAATATACCCACACGGCAGGCGGAACCCTTGGCAGAGCAGAAAGGC
CTCCATGGATGCATTACGGGAGGAGCGTGGCTTCACGACACGGACTTGATCAAAAAAGAC
CTCACTCTTGTGAATTAAAAACGGTGTATTGGGGCCACGAAACATTTTGGTCACAAAGGT
CCCTCCCTCTTCGAGGACACACGTCGTAATCAGAAGGGCGGCGAGCAGCAGTTGGTGTTG
GAGGTACTCATCGAGCTCATGCATCCCTGTCACATCGGGGGCACCATCGCAAATGACAAT
ATCGGCCTTGGTGACCCTCTTCTCGTCCGTTCCACGCGATGCATTGTATTTTAAATAATG
TTGATTTAGAAGCTCAATAATGTGTGCGCTCGTCTTCTCGGATGTGATATCCCCCTGCAC
TAGCGTGACGCCTTCAATGGGCGACATCTCCTGCAGGTCTACCGCAATAATGCATGGTTT
GACATAACTGCTAATATCATTGTTACTGTGGCGAGCACGCTCCTCCTCCTCCACTTGCTG
AAAGTGTTTCGATAACACCTGAGACCAGCTGCCCGGTGCGGCACAGAGGTCCACCGCCCC
GCTGCGTATTTTGTTCTTGTCTAAAATATTATACTCCTCATTGATCTGAAGTAGTTTGTA
GGCACTACGGGCACGATACCCTTCCTCCTTTGCCTTACGGTAGTAAATATCGCGTTTATC
TTTCGATGCTCTTCCCATTGTGGAAAGGGTGGTTGAGTATTTTTTTCGTTACTTTTCAAT
AAAGGGAGAAGGGAAAAAAAAATGTTCCTCTTTTCATGTATGATGGAAATTATTGATATA
CCTGTCATGCAAAACCCGATACGTTGAAAAAGAGGTGACCCCCATGGAAAAATAAAAGTT
CTATAGATCTTATGTAATAATAATAATAATATGAATCGTAATGAAGAACACAATGACGAG
TCGCTTGTATAAGTAGCGCCCGATTGTGGTACTCAATGTTGTTGACGTTTATTCTATAAC
CATATTTTTTTTTCCAATTTTTGAGATAATGGGCCACATGGCTCTACTCCTTCATGTGGT
GGCGGCGCACCTCATCCCGGACGCGCTCCTCATAGGCCTTGATATCCTTCTTGTACAGCA
CATACGGCTCCTCCTGCGCAGGGTCGGCAATATTGGGTGAGTTGAGTAGCTCTTGGATTG
CCAGCAGGATTTGCTTCACGGTAATATTCGGCCGCCAGTCCTTCTCCTCATTGAGGATGG
AAAGGCAGACGGTGCCGCTAGGATAAATATTGGGGTGGAACAGAACCGGCTTGAAGACGC
ACTTGGGTGGTTTGGTGGGGTAATCCTCCGTGAAGGTGAGCGTCAGACGGAACTCCCCGC
CTTCCCACGGGGTGCCCACCTTGCCGGGGATGCCCGCCTCCCACCGTAGCAAGTCTAACC
CTTTCGCCGCCCCGTCCCCGTCGCGCGGCCGCTTCTCACCGCCTACAAAATTATCCAAGC
TGCCTTTGCTATTCGTGTTGGTGGAGAGTTCCATCGGTTTCGCCCAGAAGCCGAACGGTC
TATCTTTCCGCCACGTCTTTCGCTCCTCGCGTAGTCGCGACTGTGCTAAGGAGTACCCGC
CGGACATAATGGATGAATGCGTATCGGTTTGTGTGGGGATGGAAGTACACTAGTTTTCAC
TTTGTGCTTCGAAACAAAAAAAAAAGGGGAAAGCAGAAAGATGAGAAAGCATTTCAACGT
ACAGTAAACTTTTTGTGTCCATTTTACTTCCTTCAAATACACGTTTGAAGAAATTATTAT
TCTGTGTGAACCAACGGGGGATTATTATTATTATCATACGGTAGTTAGAAATTATTGAGC
ACCTGCACACAGCCAAACGGAGGGGTGACGCGAATAAAAGGGAACGCATACATTCGTTTC
GAGCTACTTTCATCGCCTGTCTCGGACTTGTGCATCTCCACATCTTGTCGACGATTCATT
TTCAACAACCCTCGCACGTACACCGTGCTGTTGATCACCAACTGCTGTCGGAGTAACGCC
CGTGGGACAGAGGCGCCCATGCAGCGGACCGTAATGTACTCTCCCTCCTCCCTTATCCGG
TTGGCTGCCGTGGTCCGGCTCGTTGATGCGCAAGATGAGCTGTAAGACTTCCTCCTCCAT
CACATACCCTTCCTGGATATCGACCACCTGTCCAAAGATATCCATATTGAAACACACGCG
GTTGTGCACAGGGGTCTCCTCTGGTACGGTGGGGCTAACCTCCGTTGCGGTGAGGCTCCC
TTCCTCTTCATCGGTAGAGGTATCCTTCTCGGGCTCTACCTCCTCTTCCTTTGTAGCTTC
GTCTCTGGTGTATCCTTCATACATGCGACTGACGCGGTCCTGCTTGTAAATCTTCTCCTT
CACCTCCTCGCTCGTCAGCGTGAGAGACGGATGGGCCTCATCAATGTGGTCTAGCAAGTT
GTCAAGGAGACGATACCTAGGGGCGTTGGTGGGATCGCAAAAGGGGCAGTGAAAGAAGTT
CCTACCATCCTTGCCACTGCTGTTATCGTGGTTGTTGTTGTTGTCGTTGGATTGTCCGCC
GTCTTGGGTCCCGCTGTCGCCACTGGCCGTCAGCTTCGCCTCCGCCTCCCACGCCACAAA
AGGGGTTCACCGGCTCTCGGTCGAGCTCCACCACCTCCTCCTGGACGATCCCACTGCCAT
ACTCCCCGAATGGGTTGGGGTAGTCTTTCCGCTTTTCCTTCACTGACCGACGAGCGGCTG
CTGGGGTATGCGGCGATTGCCGGTCGAAATGATCTCGTCGGTTCTTAATCGCTGGCGCTA
CATTGTCGGGTGTCGTCTTGACGGCCGTGGCGCTCCCATCTCCATCCCGCATCGTTGTTC
TCTTCCGCGTATTATCCGGTAGACTACTTTTGCTGGCTGCCTCCACCACCGTGTCGGAAA
AGGCAAAATACTTTTCTTTGGAATCCTTGAACAAATCCTCTCGGTCGATGGCCACCTCGT
CCCAGACGCTAATGAGTATCTCATCGATAAACGATTCGGTGGGCAGCTTCACAGTCGCTA
GCGACGCCACCGCGCTCAGTTTTACTTTCGTCTTGGGTTCTTCCTTTGCTTCAGTCGTCT
CTTGCTTTGTGGAAGTAGTCGCATTCTCTTCCGGCAGACGGTCCATGGATCCTTCCGCCT
TCTCGTGTTTTAACAAGTGATAGTGCACTTGAAGAAGACCGGTAGGTAGGAGGTACGCCT
TCTCGATCGCCTCTTCCTTCCCACTCTCCGTCCCACCTTTCCGGTTGAGGGACATCTCCT
GCGGCAAGTACAAGTTGTGGTGTCGGGTCATCAAATGCTTCTGGGCGGTCTCATAGCGCA
CGAAACCTTTCCCACACGCCCCACAGTAATAATCACAATCGTGAATGTTGGCGATTTGTC
CTCGAATAATTCCGTTAGAAATCGCGTGCACGGCCGCCTCGGAGAGGACGTGTCGATCCG
ACCGTAGCACAGTAGGGTCTGGCGCCGCTAACGTGATAAAGTTACGAGGCACCTTCTTGT
GGGTATTCACCGCCATGAGCCGTAGGTTGAAGTCATTGAAATCGCTATTCTTGTAGTATC
GTATTTTACTTTCGCCCTCTTCGAGATACAAATTAGAGGACATGAACTTGTTGCCAGTGG
ACCGCAGCGGTGGGGGGTCGTGCGTGGGGGTGTAGGGGAGTAACTTTTTAGTGACAACGG
TAGAGAACCACTCTTTTTGTTTCCGGTTGAGGTACACCGGAGGAACGGGGTCGTCGCCAA
TCAACTTTTTCTTGAACTCATCCGTTAAAATTTGACTACTCTCCGCTGCCGCATTGCTAC
TGGTGGAGTGAAGGGGGACACAATTCCGTTGGTAGGTGTCGATCACTAAATCTGGCTGCA
GCACGGGGGGCAGCTGGTGGGCAATGTAGGGGTGAATATTGTGCTTGTGCACGGCCTCCT
GCAGGAGCTCCCCAAAGAGGTTTTCGGATTCTTCGACTAAAAAGTGAGTACAGAAGTTGA
GCTCCCTGGCGGGGGGTGGGTGACTGCTTTCCTCCTGAGTCGCGGTTGACTGTAGTCTCT
TTCCTCTTCGTAACGAGGATTCGAGTAGGGGACCCAACGCACTCACTCGCTTCATGCACT
AATATGAAAGACTTTTACTTTTATAACTGCATGAGTTTCAAAAGGGAAAAAGGGAGAGAG
AAATGATAGGCTAGGTGGTTCCTGGCGAATGAAAGGCGTGGCGAGAGAGCAACGTTCACT
ATCAAAAAAATCCCTTTTTCTCGTTCTTTCCTAGCCTTTGTTATCAACAGAAAAAAAAAA
GTCGAATGTCGTCGTCTTCCCAAAGAAGAAAAAACTTCACTGACGATATACTCGTCACAA
ATATAATGCAGTCAACCCTTTTCTCACACCTCATTCTCATTATTATTCAACGGTCGCTTA
GGGGAATTCACCATATTCTCCAGAGACGTCCGATCAATGTGATTAAACGAACTATTGTCA
ATCATGGAGTCATTATTGTTTAAATTGCGGAGATGGTGAGGGTTGTAGTTACCGGTGGGG
AGTTGTAAATGCTTGCTGCCTTTTACGTGTTCCCCCTCATCGGATGACGATGGCGACAGT
GAGATGCGTCCCTCCTCCCCTGGCTCAGCGGCACTACCCTCCTGCGGTTCCTCATGGTCA
GCAGGGTGGCCGTCCTGATCCCTTTCCTTCCTCTCTGGTGGTGCCTGCCCCCCTTCGTCC
TCCTCGCTCAAGTCTTCCTCCAGCTCCAGCCGCAGCTGATCCTCCTCCACCTTTGCCCAC
ACCTCGGCCTGCGCCAAGGGGGCCGACGTACACTGCAGCGTGCGGAGAGAGGAGTTGATC
GAGCAGACAAGCAGGGCCAACACCAGTAGGAACAGGAAGAGAGAAAGAAAGGAGGGGACT
GCCTTCGGGTATGGGAACGTGTACACTGGTAAGGTCAGCAGGAACACGAGGACGACACAC
ACCACCGCCCGGCTCAGCTTGCGTTGCTGCGAAAGGGTGGCGGACGTCTGCTCCAGTCGC
ATTGGCAGCGGCGGGACGACCATATTAAAATAGTGCAAAAAATCTTTCGTGTCGGAGATG
GCGGTAAAGTTATGGGAACGGATGGGAGGCAGTTTGCGCTCCGACGCCGGCACCTCCCAA
CTGAAGATGAGGATCGGGTTACGATGCTTGTAGTAGTACTGCCGCACCAAAGACGTCTCT
GTCTCCTCCTCCTTTCGCTCCGCGACGGCGACCGAGGCTTCCGGATTATTCTCTATCACG
GCAGTCTCCTTCCTTTCGTCTGCACTGACGTACCAGACGCATAAACTGACCTTTGGACAT
CATTAACAAACCTCGCAGGAACTTGAACAAACCGAAACTATTGGCATTGTAGCCGTGAAT
ACACGCATACTTGACGGACTTGAGATCGGTAAAGGTGATGATGGGCTTCGCAATGCCCTC
GTAGACGGTGATCAGACGCTGATCGGTCAGCAGATACAGACGTCTGCAACCTCGAAACAA
CATTGCGAGCATGACGGAGAAGAAGGCAATGATCGCCATGGCCATCAGCCCTAGGGAGGT
GCTCCTCGTCAACTTCACAATGGCGAAGCGTTCATCGTTAATACTAGCGAGGATACCAAT
CCAGACACCAAAGAAGAGGCCCACCGTCAAGTTGGTGAGAAGCCAGTCGGAGTCTCGCAT
TATTTTTGAAAAGAGAGGGCGGTAGCACCAACAGGACGATCTCATCACGGAAAAGTGTTT
CTTTTAGTATCTTACGATTCTGCGCGGAGAGGATATCGGTGCTGAGGAGATGTAGCGTTT
CTGTTTTTTTCTGCTTTCGCAGTGTAGGTGGGATCGGGTCCACCACCTTTTCAATAATAT
TGACCCGACTATTCATCCCATGGGTTTGGGAAGACGGACCGTTATTGTGATTATTGTGAT
TCGTATTACTTTGGACGGTATGCTGTAGTTGGCTCAACTCCGGTGAGTAGCCGCTCGTAG
AAAACATGGATTCCGAGTTGGTACTCCTCGAAAAGTGAGGGGTGTTCATATCAGACGGTA
TGGCAGTCGGAAGAGGAAACTCATCGTCCACGTCGACGACCACCTCCGTCTCCTTCCCCT
CTTCCCTCGTGGTCATCTCCTCCTCGAAGCGGACGTGTGGCTTTTTCTTGGGTTTGGGCG
CTTTCGGCACCACGTGTTCCGCCTTAGCTGGTCCAGCATTGGGGTGGGCAGCGGCGGTAC
CGGTTGGCGCCCTCTCCCGGTGTCGAAGCGGTTCCAGCATGGGAAACACCTTCAGAAGGT
TTCGTCCCCGTAGCCACACCGTGAGGTGCACATACAAAGTCGACTGCAGCAGCAGCAGCA
CCTCGTTCTCCGCCGCCAGCTGGGGGTCCAGACCGGCGGACTGACGGAATGGTTGGATGA
GCACTCTCGACTGGTGGCGAAGGTAGACGTAGGCGGCGAGGTAGGCACCATAAGCAAAAG
CCAGCAGGACGTAAAAGTACACATCCGAGAACCACGGTTTGAGGGAGAGGACGAAGGAGA
AGATGAGGATGAGACTCATCACGAGGAGACCGATGGTAAGCGGCAGGAAGCACAACCGGG
CGGCGTTACACCAGACGCACACCTCGCCAGGGCCGAGGAGGGAGGGCTTCACACGACCGC
AAATGGGGCACTTGCCGCGGAGCAGTTTAGGGGCGCTATTATTACTATTATTACTGTTGT
TATTGCTGTTGGTCGCTAGACGGGGGTTCTGCCGGAGGTGCACTTCATTGTCGATCTTGT
CCTTCACCTCTTTCAGTACTGCCTCGTACTTTTCCTTGTCGCTGTTTTTATGCTCCTTTT
CGTTATGCACCAGCGTTCGCAAGTACGGCTCGTAGACCCACGGCAGTTGAGTGATGGTGC
GCGCCCACAGCAACGCCGCTACATTGAGCGGAAGAAGAAGGCAGGCAAACACAAGCGCCA
CAATACTCGACGCCCGACAGAAATAGATGTTGTTCGTGCGGTAGGCAGCGCTACAACTCA
TATCCGGGCAGCTGGGATTGTGTTTACGATGACGCAAGTCGGGGCAGAAGTTGTCCCGCT
TCTTCCTCGCCGATGTATTTAGCATTTCATCCGACAAGAGATAGAGGGACAGGATGGAAC
GGTTTACCTCCGTGCAGGTACCAGTGCTGGCGCACCAGCCACAGCTCAGCGCGGGTGGCA
TGAGACCGTCGGCGGGGTCGTAGACACACTCACTACACCGCGTCACGGCGGAGCACGAGT
TAAAGTTATCGTCGCTCTGACCGGTCGCCTCTACCAGTGACCAACCCGGTGATGTGTGGC
ACAGCATACACCACACGCAGAACACGAAATAGACACACGTAGAAAATGAATACATGCGGT
CAATAATAATAATAATAGATAATAAACTAAATTAAAAACAAACGATACGAAAAGTAAATA
TACTTGTGGTTGCTAAAAATGATAGGGGGAAGCAGAAAGAAAGCGATAAGACAAGAGGCA
AAATAAAATCACACTCTCCTCTGAACGACGACAGATACTATGAAACAGCACAGCAAACCA
ATCGATCTGCAACAGGTGTAAAAAAAAAAAAACTACGATAGACAGGTTTTGGTGGTATAA
AAATGTAAGTTGCTTTGGTTCGTTTTCGTACTAATTTTTATCCTCCCGACGAGGGCTCAC
GTAGGACCATATCTTCCCGAGGATGCACCCCGCCACGAAACCTCCCACGTGGGCGGCGTG
CCCGACGGTCTGTCCAGGCAACAGCGAGTAGAAGGAAGGAGAGCTGCCACGGTCCCTTGC
GTTCTCCCCACTGAAGACGGCCGACACGAACCGCGCCGCATCCACCGATAACGAGATAAT
CTCTGGCAGCACAATCGCAACTGACGTCACGGGGCGCTTGTAGTAGGTGAGGTTGAACCC
CGACAGCGCGCACACCCCAGCACTGGCCCCGCACATGAAGGAGTTCTCATTGACTTGCTC
CTGAATCTTGACGACGGTATCGGCCTTCCACGAGCGGATCGGGGCGGCCACCTTTTCTAC
CGCCCTGGAGAAGAAACCACCGGTGCTGGCCGTGGTACTCAGCGGTGCCACGCTAGAGGC
CGCCTCCGCCAACCGCCCTGCCGCACCGCTGAGGGCGTTGCTCCCTTTCAGGCGGGCAGC
ATCAATCTTATACTTGAGCAGCTTGGAGTCGTTGTAAAAAAGCTGTCCGCCGACCCCGCC
GAGGGCACCGCCCACAATCATGACGAGGAAGGAGCCCAGGGTCCGTCTCAACACCACCGT
GCTGCGGGTCTCCTCAATGCTCTCCCGCATGCCACTCCCACCAAATTCTAAAAGGGTGGA
TGAGAGGGAGAAGACATTCCCCAAGACGTGCTCCGCGTTGCCGTGCACAAACATGTGGGT
CACCAGCGTGTAGGCGGTGGCGGGGGAGAAGGTGGCGGGGGAGAAGCCGTAATAATAGAC
ACGCTGCATGCACTCGTCGTCGGAGGCCCAGTGGCACTGCACGACGTAGCCGCCACCACG
TATGCCGGCAGGGTAGATGAGGATACAGTGCGCGGCGAGGAGCGCGATGGCGGGGGAAAA
GCGTGTGAGCACGCACAGAGTGTCGACCTTGACCATGACAGAGAATGAAAAACTTCTCTT
TAAAATAAAAAAGGGTGGAGAAGCTATACGGTCAAAAGGGTTTTTGAATTGGTGCTTTGA
TGTGGAAACATGAAATAAAAGTAACGCCGTGTTTTCTTTATTCGTTCATTTTAGTCCTCG
TTTTGTCGTGGTGTGCATGTAAAACAATGCACTCATTGAAAATATGTGTTTAACAGGAAA
AGTAAAGGAGGTACATAAAAAAAAAAAAAATGAGTTAAAAAAAGTAGTAAAATGAGAAAT
TTGGGGACGCTAAAAAAAAAAAAAACGCAAGCAACAAGTGGAACCCATACGCTCCAATAC
ACAGCACGAAGCCCATTCTATTTTTCTTTTCCTTTTTGTGAGAGGTAAATTCTACATTAC
ACCATCATAACGTGTATAACGGAGTGTTGAGAACTCCCATGGTGTAATGTTTGAATTTGT
TTCCTCTTTTATCCATTATTTTTTGAATTTTGTCGTTTTCGCTTTTCGCTTCGCCAGCTG
CTTATCAGAGCACATGTGTCTATCCACCGTTTTTTTCTTTTCTTTTCCTCTTCTGCTTAC
GCAGTAGAAGAAAGCACCACACCAGTCTTCTTGTTTTTATCCACGGAGAGGGCGCAGAGC
CAGTCGCCAGGGAGCTTGGCAATGTAGGTGATGCGCCAGTCCTTCTGCTTATTGCAGCGG
ATCTTGAGCTCATTACCGGGGATGAGGGGGCAGGCCACCTGCACACCACCCTCGCCGTCG
ATCTCCTTATTCTTGGCGTTGTACTTGAGGTAGCACGCGACGCGGGGGGAGAAGTTGGCG
GAGACGGGGGCCGGGGCCGAAACACCGATGGTGTAGTTACGGAGCTGCTGAGTCTTGACG
CTGAGGTGGACACCACTGACGACGTTCTTGGCCGCCGCCGCTGCGCTCCACTCCTTCAGG
TTCTTTCCGTTGACATCGAGGATGGCATTACCGCCGACAAAGACGCCACCAGCGTTGTAG
GCCACCGCCACATCGGCGACGTTCTTGTTCACCTTGGTGTTGACGTAGACGAGGCCGAGG
GCGGACAGGGGCACGACGCCGGCCTGGGTTCCTTCCACATTGAGCTTGTCACCGTTGCGG
CTGACGATGGCCTCCAGCTTCTGGCCCATGTAACCGTACGAGACGGTTCCCTTGACGCCA
TTGAGGTCATCGGGGGTGAGGTTGAGCTTGTAGCCCACGCCGTACTCCGCCACGCTGCCT
TCCACATCAATGAAGATCTTGCCATCGTTGGTGGAGGTGGGGCTGACGGAAAAGGAGTCC
TTCTCCGCCTTCTTCTTGCACTCCACCTTCCACTTGCCACCCTCGGAGGTGTTCTTGTCG
AGCAAGTCCTTGGTCTCCTTGTCGAAGTCCTTATAGGCAATAGGAACGCTCATTGGATGA
AGAGGTGGGAATATTATGTGTATAAAACGAGTAGAATTCTTGTTGGAAAAAAAAAAGTGG
AAAGAGTAAAATAGAAAACAACTCTACATTACAGGGATAGTCCAAATAAGATGCACATCA
ACAATATGCAGTGGATATAGACATAAAACGCTGGGTGGGAAAGATCAGAAAAAAATCGCT
AAGGGAATAAGTTTGTAGAAAAAAAAAAACGAATGTGATATACACCTTTAAGCACGGTAC
AATTATCGCGTTTTTTTTTTTTAGTTTTTCTTTAAGGGTTTTGCATTGATATAATGTAAA
AATAAACGTACAAAAAATGAATAATTTCATTGTTGCGCATTCCTAGAATGCATCGTATAT
TTTACTATTTTTGCTGGTTTCTCTTTGTAGATTCGCTTTTATCGATGAAGCATTAGTTGT
GGGTGAAGACCACGCCAGGCTTGAGGCTGTTGTCGATAGAGACGGCAGCAGACCAGTGGC
CGCCGGTGGTCACGTAGGAAAGGGTCCACTTCTTGGCGTTGTTGATCTTGGCCTTGATAA
TGTTCTCGGGGTGAAGAGGGCACTTGGTCTCCACACCGACGGTGGCCACGAAGGGCACAT
CCTTGCCGCAGACCGTCTCCATCGCGAGCATCATCGTGGCGGCGTTGCCCTTCTTGAAGC
ACTCCAGCGGCACGGTGACGTGTAGAGGACCGCTCATGGAGGTGGTGTAGGTCTTGAGGC
GGTTGGTCGTGATGGCGCACTCGCACTTGGACTTTTGGTTAAAGTAGCGGCAGCCAATGT
TCCAGTTGCAGTCCTTCTTGAGGAAGTTGTACGTGGCACCGCAGCCGACCTGACACTGGG
GGGCGACATCCACACCGAGGCCGAGCTCCACATTATGGCGACTGATCTTCTCGTTAATGC
TGGCGCGCTTGTGGAAGAGGACGGAGGTCTGGTGGCTCAGCTCCATGAGCACCTTGCCGT
TCTCCTGCAGGTGCATCACGGACTCCACCTTGTGGCCGTTCTTCTCGTAGGTGAAGGTGT
TCTTGTAGTTGTCGTATCCCTGAGGGGACACCATCACCTTCACCGCACCACCGCAGGGGT
GGACGTACTCGATATCGCAGGAGATATCATTGTTGGTGGCGGAGGGGTTGATGACGACAG
AGTTGGGGGCGCACTTGTGCTTGCTCTCCAGCTTCCACTTGCCAGCGGCGCTGTGATTCT
TGTTGAGGATATCCTTGGAGGCCTTGTTGTAGTCCTTGAAGAGAGAAGGGGTGGCGTACT
TCACCTGGGCCAGCTCCTTCTTCTGGGGGGCGGCATCCTTGTTCAGGATCTGGTTCGCAG
TCTCCTGAATCTTTTCAACAGCGGCGTCCACCACGGAGGCGGGCTTCTCCTCAACGGCAA
CGGGCTTGGAAGAAAAGAAAGACATTGAAATCTTTGTTTTGGAAGTCGAAAATAAAAGTG
AATGTGAGAAAGACTGTAGAGGGGAGAGATGGGTGTTGTTGTTGCTGTGTTGAGAAGCCG
GATTATCTAAAATAAAACAAAAATGAGCACCAAAGCAGACGGAAAATATTTTTATTGTCA
TTATGTCAAGTAAACGACTTACTTGTCTAGCAATCATTAGAAAAGAAAAACTGACCAGCA
CATTTACATCCAAAAAAAAAAAAAATTAAGTTAAACATCAATTATAATAATGATAAGAAA
CAGGACATCTAATTAAAGTAACTACTCTTCAGGTATTTTCCAGTACTGGCATCCATGGAC
GGCCGCAGACCGCTATCCCGTCGTACGCGATAGTAGTAGTACTCGTCCGGTACCGTCGCC
GCCAGGGTGGAGGAAGAAAGGCCGGATGGTCGACGAGTGGGGATGCTACTCCGTAGGCTG
GCACTTCGGCTCGTGTTTACGGAGGGGTAGTTCGTCGAGCTATCCGCGTACGGGTGGTGG
GGACCACCTTGGCTGCTATTGGCGAAGCTCGTCCTCGCACTAACAGTCCGGGATGCCTGC
GGCAGCGGGGCCGTGCCGCCGATGGTGAGGGAGGGTCGTGCGGTGGGGGAGCCAAAGCCG
GAGGTGACATCCTGGCTGCCACTCATCGGGGAGTGCAGGGAGGGCACGGCGGAGGAGTAG
AAGGCACGAGAGAAGGCGCTGCCCCCCACACTGTTGGTCACGCTGTTCATGAGAGAGGTG
GCCATATTGGTAGAGGGCATGCTGAGGCTCACATCCAGGCCGGTGACGTACGTCCGGTTG
AAGTCGTACTGCGGCGTGGTTTGGTAGGTATCGAGGGAGGGGGAGCTGGCCGGACTTGTC
GTGTTGCTCGTCGAGTTGGACAGCAATTCCTGACGGGAGAGCGGGTTGCGCTCCCCCTTC
GGTGCCCCGTGCCGCTCCCGCGGTTCACCTCCAGTTTGACTTTGGTGCGGGGGTAAGAAC
ATCCCCATCGAAAAACGAGGCACCTCGAAGTTGGCAGGGGAGCTCTTAGGAGAGCGGCGG
TGGAGGCTGTTGCTGCTGTCCATCTCTCCCTCCCTGGAGCTTCCTGGCTCCCGGAAGTGG
CTGGTGGGACTCTTGTAGGACCGTCGACGACTCTGTGGCCGAACCAGCTCCTCCTCGCTC
CCCCAGCTATTATCTCGCATACTTTCCCGCCTCGCCGAGCTGGAGCGCAGGGTCGTGCTG
TCGAGCATGCCCCGCTTCTCATCCTCGCTGGTTGTGCCCGTCTTGCTGCTGATCGTGTTT
AGCGTCTCCAGGCCCACCTCGAAGGAGGTCTTTTCACTCTCGTTTGGACTCCCAAAGACC
GACTCACTGGCCGTACTTCCCACCTTTTGACTAGCGCTCTCGTCCTCCCTGTCGTCCCCC
AGCGCCTTTCCAGTCGAGCTAGATTGGTTCACGTCCGTGTTGCAGGCACTACTCGTGTTG
TCACTGACAAAGTTGTTGCTGGAGAAACTAGCACTGCTGGCCGCCGTGTGAGACGACACG
TGATCGAGCGGGGCCACCGTCTCCTCACCCGCGACGGACGGCTCACGGGTATGTTGCAGT
GCGTCGAGGTCGCCGGTGACCGCACTAATTTCAATGGACTTCTTCTCCGTCTCACTCCTC
TCTCCGACGCTATTCTTCTTCACCGGCGGCTCCTCCCGTGAGGTGGACTTTTGGCCAGAG
TTCCGCACGATGGGGAAGTCCATGGGGGAATGGATGTTGACCTTCACCCCGTGCTGGAAC
TCCAGCGGCGACAACACCCGTGGTCCGTCACTGTTGCGACTATCGCAGTACCGGCCAAAC
TTACCCGATTGTCTCATGTTGAGGCTATCATTTGCGTCGCTAGTGTTTCCATCCTTGGAG
CGTCGCTTACTCTTCTCGTGAATATCCTGCAGCTCGCTGTCACTGTCATCCATCTTGAAG
CACTTGAACTCGGCGAGGCTCTTTTCCTCTGGGGAGAGCACCTCCTTTTTCCGGTCGACC
GCATTCGCACTGTTCGCCCTGGCCTTGTGTCGGTGTGGGTGGTGTGAGGTGGACTCTATA
CGACGGCTGGCGCCCGCATTGGACATCCTATTCCTTGACTTTTTCGGCGTTGAGTGTGAC
GCGGTACTCCCCTCCGACAAGGTGTTCGCCTCATCGGTCAAGCTGCTATTCGGTGGTACG
CTGTAAAAGGACAGTGGATCTCCGCTCAAAAAAGTAAAACTACTGCTGGTGAGATCCCTA
TGGTTTGCCCCACGTATACTCTCCGTTTGATTCGAGTAGGACGAGGATGACGAGGAGGGA
TCGAAGCGCACGCTGTGGAGGAGGAGTCGCTTCTTCTTCTCTGCCGGGGTTAGCTCGAGG
GAACTCAGTATCTTCGGGTCGACGGGCTGGTTGTTGGGGGTGGCGGTGTCACTGACCATT
GCCGCCACCTCTGTCGTGTTGGGTGTACCGACCGCAGCCGTCTCCACCTCCTCCGCATGG
AGCGCTTGGACTGGTTCTTCCGTCTTGGCGGTATTAGGGCTCTCAGCCGGTTGTTCCGCC
GTTACCTGGAGAGCGGCGGGTAGTTTGGTGACGGCAATCATATTCAAAGGTCCCTTCTTT
TCTGCTAAACTGTCACCCGTCAGGTCCAGTGGCGCTTGTTTGATCATGGAGCTCATCGCC
GCGTGCACCTGTTGCAGCAAGTTCCTCGCCTCCTCCTCGTTGTCGGAGTGTGACGTTTTG
CTGTAGACGGTCCGGTTGAACTCCTCATTGAAGCTTTCCTCCTTGGGTGCCGTGTCTGGC
GGTGGGAGGGGCTTCCTCTCCTCACTCAGCGGCTGTTCAGCGGGGGTCTCACCCTTTTCC
GTACCCTCATCACAAGTGGTGGTGTTGAGGCCTCGTGTGGACGACGATAGTGTTGTGGTC
GAATAGTTCTTGCCGCTGCAACCCTCCTCCACCACCTCGCTACTGACCTCTGCGGAGGTC
CTGGACCTGTCTTCGCTCCCTTTCTCTGTGAAGAATCGATTGGCCGTGTCCAACAACGTT
TTGCTATTCTCGTTGGGAACCGGCGCACGGGAGTCGGCGTTGCTACTACTGCTGTTGTCG
AACTTGCCTGGTCTGTGGGCCGACTTCGCATCGGTCGAGGAGTAATCATAAAGCACGGAG
TAGCTGTCGTTGTAGCCGCTGCTGAGGGCGTGGGGGGGCACGTTCCCGCTGCTAAAGAAT
AAATCCGTACTGGCACTCCGTCGTCGTCTCTTAGGGGGTACGTGATGTGGGGTGTTAGAA
AAGAGGGAGTCCCGCTCCAGGACGCTACGGCGCTTCTCGGAATTCATCGAGTCCTCCTCG
GAAAGAATCAGCTCAATGTTCAGATCATTTCCGCTGCTCACGGTGTTTAATCTGGGTCCC
GCATCCGGTGTGCTCATATTCCTTCGAGTGGACACATTATCCGCTGAGGAGGTGGAATTG
CTGTTCTGCACGAGGGGTTGTTCGCTGCTGCCCCGTGCGCTCAGCCGGCACAAGTCGCTC
TTCTTCCCGTCCGACAGCTCCCCTCCCTTGCTGCTGTCCGTCTGGTCGCTGTAGATCTGA
TCCCGACTGAAGGACTGCCGCTGCAGGGAGAGGAGCGCCATCTCCTGTAGAATCGCATCC
CCTGGCTTCTGCGTCTCCCCGGCCCCCACGAGGGACGACTCCCCGGAGTCTTGCCGGGAC
ACCTGCACATACTCCTCCTCGTGCCGCCCTTCGTGGCTGTGTGTACTAGAATTAGAACTC
TTTTGGGGGCGGCTCGGTACCTCGTCACTTGTCCTCCTCCCACCTGGCGAGGGCAGCGCA
GGGGTGTTGGGGCTCACATTGTTGGTATCCAGACTGTTGCTGCTGTAGTGACTGGCATTA
AACACATCGTAACTCAGCAAGCTCTGGTTACTAGCGTTGCTGACGCGCGGCATGCCACAC
TGTTCTTTTGCCTTGTCCGCGTCCACCTTGACCGAGGCGCCGCTGCTGATATCCCCAGGA
ATGGGGTTAAAGGCGGCCCACGCGTCCTTTCCTTTGGTAGGGCTGCTCTTTCGATTGCTG
TTAGGGGCCGATCCCTCTGACGTGATGGGGGACATGGAGCTCCGACCTTTGCGGCTCTTC
CTGCCACGGGAGCCCGTCTCCTCGTCCCCGGCTGGGGCCCCTTCCAATACATCCTCCACT
GTAATCTTCTTTTCGTAATTCAGATAGTACCGTTTGTTCATGAAGCGTCCGTACCCGTAG
TTGTAGTCCTCTGTCGGATTCTTGTTGACATTGTTCTTGTACACCTTATTTTTATTGTGC
TCCACGAAATCATACTCCAGGCTGTCCCCCTCTCCTTCCTCCAAGATGACGGAGACGTGA
CTCTCACTGTCCTCCTCGTCCTCCTGCGACTTGTAGTTGCTCTCGTCGTCGGCGTCGTTG
TCGTGGCGGTGGCGGCAGTTGCCGTGTCCGTCTCGCTTCTCCGGTCCGCTCCTCTGGCTG
CTCGTCTCCTCTCCTTGTTTTCCATGTTTTCCATCGCCGAGGGGATCGCTGTAGAGGTTG
GACTCACAGCCACGTATGCTGGGCACCGTATCGAACAGACTATCCTCTTCTTCCTCCTCC
ACTTCCTCGTCGCTGCGGCCACTCCCGTTCTGCCGCTGGGAGGCATCCCGACCGCCCCGC
TTCTGGTCGTACCTTGACCGTCGCTGTGTGTTGAGGTACTCGCTGTAGTTGGTGGAGGAC
GTGTAAAAGGAGCTGGGGGTGCGTTTCAAATTCGTCTTCATGGAAGTCCCCGTAATGTTG
TCTCGCACTAAATCTACCGTGATGGGAATCGAAGAAACGGCATCTGGTGGGGTATCTTTT
TTAGGGGGTTTCTCCGGATTTTCTTCTACCTTTGGGTCTATTTTGAAGGAAGCTTGACGC
TTCTTCTTCTCATCCTTTGCGTCTTGCGGGGGATCTGCCTTCTTTTCACTATTCTCCGCG
GCGCTCTCGTTTCGCTTTGGCTGCTCCTTCTTCTCATTACGGCTGTGCCCCTGCATACTC
TGTGGTAGCGTGTACTCCTGTCTGCCAATGAGAGAGTTGGAGTTGAGCGACAACTTGCCG
GAGGGGTTGGGGTGCCGGGGGGTGGTGTAGTCCTCACTGCTGTTGTCCTTGCTACTATGT
TTCGGTGCGGTAGTGGGCGTCGGCTTCTCTGGGCGCGCCGGCTCCCGTTTTCCCTCCTCC
ACCTGGGGTGATGCATCCGTCGTTTTCTCCCCCAGTCGAGCACTGCGCTCCGGGTGCGGT
GGGCTGGCGGTCCGTCGGCCAATCAAGTTACGAATCACCGTCAACTCCCGTGTGCGGTTG
AACCACGGGGAGTAGTACGTCTTTCCGTTCATCTCCCTCTGGTGCCGGTCCATGGGTTTA
TTATTAATATTCCGTGTATCCCAGCGGTGACGGTGGTACTCCTCGCTGAGGCGAGCCCTC
ATGCAGCTCAGGATACTATCTTTTCCAACATAACTCAAAATACTGTGATTGATGCTATCA
CTCACTGGTTTCTCAAAATACGTGTGAAACACCTTCACGTCGGCGTCCTCCTCTTTCGTA
TTCTTTTTACTTTGATGTACATCCTCCGATTCCGGTCCACATGGGTTGGAGTAGACTTGG
GTTGTGTTTAGCAGGAGAGAGTTGTTGAGCATTTCGTTCTGTGTGGCGCCGGCCACGGAC
CAACTTGCGGAGGCTTGCGGCGACTCCCCGAGACCACCCCCACTGCGAGAAAAGCTGTCA
TTGCTCGGCGGAAACGGAGAATAATGCGGGGTGTGGTTGGCCACTCGCCTTCCGCTCAGG
ATGGCACTACTGCGGTAACTGAGATTCGTGTCAAGTGGGTCGTAGAAGAAGAGCCGTGAC
GTCTGCGACAGCAACATACACAAATTATTAATATACGTGTTGCAGGTGTTCTCAATCCTT
GCTGCCTGAAAATATTTGAAGTAATCGGTGTAGAGGGAAGTGGACTCCTGCGAGGCGGCG
GTGAGGATAGCCTCCTCCGGCAGGGTCATGTGCTTGGAGGCCGAAAACAAGGACGTACTC
GTACTAATCATGAGCACTATTATTGTTGGGATCGTTGTGCTGCGGAGAGTGTGGGGACTG
CGCGGGATCACTGCTCGGCTGACTCTCCTTGGTGTGGGTAGAGGAGTCGAGCGAGTTTAC
CGTGTCACTGAACAGTTCCCCACTAGCGGAATGAGGGATCATTACCCCTTTCACCAATCG
TCGTCCCACCGTCGCTGGTTTGGGCCGTCGTTTCGTTTTGCGTCCCTTCCCGCCATTCGT
ACTATGAAATGTACTCATGGAATTATCCCTCGTGTGCTTCACCCGCATCGTCTTGTGAGG
ATGAGTATCGTTGGTCGTATGACTGTTATTACTAGCAGGAGGACTGCCAGGTAGGACCAC
GGGCGGTTGGTGGGCGACAGGAGGGGCGAGGAAGAGCTCGAGACTCTCAATATTAATCAA
CACGTCGTGTAGCACTTTCCGTAGCGCCACACGGGTGTTGTGCCGCGGGTGTACCGTCTC
CCCAATCTTACTTGCACTATTATTTTGACTATCCTCCCCATAGTTCGCATTACTATTATT
GTTGCGCGTATTCTGCGAATGACGCGTGTTTCGATTGAACCTGGCGATATCGGTTTTGCT
GCCGTCAAGGGTGCTACCATTGTCGTCGAGGCTGGTCGGGCTGTCGCTGCCATCGGCGTT
CACCGTTCGTGTGAAGCGGCAGATAATATTATCGAGATCACTATTGTGCATGGCCGCTGC
TTCGTTGATGGAAACCCGTTGTGCAGCAGATGAACTCATTTCTCGTTTTTATTAGTATTT
AACTTTTATACTATTATGCTCAATATACCTTGAATAGTTTTGCTTTTTTTTTTTTTTTAG
CGTTTTGATGAATGACTTTTTTTTTTTTTTTTCGGATTCCGTAATTACAAATCCTTCACT
CTCAATGTATATGATACAGAGTAGATATTCAATGATATCTTAAATGAAATGAAAACAAAA
AAAAAAAAAAAAATGTTTCAATAAAAAAAAAAAAAAAAATACACTCGAAAAGAAAAAAAA
AAAACTGTGAATGATTCACCAAAAAAAAAAAAAACTTCTATATTTAGAGTAACTATGAGT
GAAAAGAAAAAGAGAAACAGAATAAACACACAAACAATGAAGAGAAATAAACAAAACAAC
TAAAAAATACACTGTCTACCGGCAGCCGCGTCAAAATACCATTTATTAACGAAACTACAT
TTATTATTTAAACGTTATTTAAAAAAAAAAAAAAAAACATAAACCCACTCCTCAATCCTG
GTGGCTGTAGCCGTTCCATCGTACTACTCAAATGGGCACTCATCACCTCAAACGGATTAA
TATTTTCCGCATTAAACACAAAATTCTGTCTGGCCGACGGATTCGCCATGGAATTATAAA
ATTGAGTGACATTGGCAGCCGCATTCTGATGATGATTATTATTATTATTATTGTTTGTGG
CGGAAAGGACGTGAAGGGATTGGAGCGTATCGTCAAACCGTAATAAGTCCTCCTTCACCT
CTTGAAGTCGGTTGGTCTCCTTGTCAGGCAGAATTTTTCGTTTAATAATGTTTTGAATCA
CTTTTTGCTTTTTACTGATGCTGTTGCTATCGCTATTTGTATTATTATTATTATTATTAG
AATTGGGAACGTTTCTGGCCGTTTTTGTACTACTTTTTATTTTTCGTAATTTAAACTGAT
TCACCTTTTCTTTGATGTCCTCCCGTCGCGACTCACGTTTGGAGGATTTATTCTTTCCTA
ACTTGCTTCCTTTTTTTCGTTTCAGCATGATCTCCTTATTATCGTTGTCCTTAGTGTTAC
TGTGGTCTGCTGTAGGGGTCGCGTCACCGGCGGGCTCACGCAGGAGAAACTTCTCCCGCA
TTGTTCGTCGCTTACCGGAGCCCATTCTTTTTTTAAAAAAAAATATTTTGCTTTTTCTGA
TTCACTTTAAAAAAAAACAAAAAAAAAAAAGAGAACAGAAGTTTCTTTCGGAAATGATAA
ACGGTGCGAAACAACATTGACAACAATAAAAATAGAAATAGTAATAATAAAAAAAAAATT
GCAGATGGGATGGAAGCTTCTGCCTTTATGCATGACGCACAATCTCACAGAGCCACTTGT
TCAATAACAAGATAAAAGAAGAAAAAAAAAATAGACAAAAAAAAAAGAGTTAGCAAACTA
GCGATTATGAAATATTAGTTTCATTTTTTATTTGGAAAAGAACACAATCAGTCCATAACG
CATTTCCTCTGCCAACTGCACTGGTCGGCTAGTCCAATTATATTTCTTTAATAAATACTT
TTTGGGGGCAAACTTCGAGATGGTTACAATATTATTTTTCTTGTAAAATTGTTTTACTTT
TTTAAAGCTGGCCTCATTTTTTCTTATTTGGGTGGATTTCTTTTTTTTGTCGTCCATCGC
TTTTGAGGAGACGAGTTCACTCGTTAACAATAATTCACAATTGCGTAAATACTGTTGCTG
GAAATTCTCTTTTTCTTTGAAAAAATTAGGATTACTGCTTTTATGAGTGATTCTCCGTTG
TATTTCAGATTCTTCTATCGGTGTGGTTTCTTCATCTTTATTATTATTATCATCACTCTG
GAGCGGTTCAGCACCACTGCCCCTAAAGTACTCCTCTCGATACAACAAAACTGTATTCGT
CACATGAATCATCTGTTGTGCTCTTTTTTTAACTTTATGGGCAGTTGGTTTTTCTACCGC
TACCATGGTTTGTGGATGGGGCACTAGTAAAGGTTCATTGGTGAAACAGAAATGCTCCGC
CGCGTCTTGTGCCTTTTTATCGTAGGAAACAGGATTATAAACGTGAAATAAAACGGAAAA
GAAAACGGATTCTTTTTCTAATAACAATAAGACACTCACACTGTTTTCTCGTATGTGTTT
TCTGAGAGTTTCAGTCTTTTTGCTGTTCTGTGTCGCTTCCTTCTCCGTCTCTTCTGCCGA
GTTATCTGTTAATTTGAAAAACGTTTCCATTGGTAGTAGTTTATAATTTTTCGGTCGTCC
GATTGGTTCAAAACTAGTATTAGTATGATGAGGAGGATAATGGGTATCCTCCGGTGGCGG
TTGAAATCGACGTGTGTTCGGTCCTCTGCTCGTATTATCCTCCGCGAAGGAGGACGGCGG
GGCAAAGGTAAACAGCGCGTTCTTATTATTATTATGAGGTGACGGACTGGATTCCTTATT
TTCTAGGATGGTAGAATTTTTACGACGGTGATGGGTTTCTTTTCCGTAAGAAGGGCAAAT
AAAGCTCAGGTACTCCTCTAGTGAAATAACAGTGCAGGGAATGGGAAGAGGGGCGCCGTC
GGCCTTCTCCAGTTGATGTTCGATTGTATTTTCCTTCACGACAAATCTGCCTTCCTCCTT
TCGTTCGTGATAATAATAATAATAGTTGCTAGGGTATTGGGGTAACCCAGGTATGGTGAC
ATACCGCCCGACGTGTTGAAATGAACCTCTCACTCTCCTTTTTAAATAATTCATACACAT
CGGAGTAGTTCAAAAACCGAAATTGTGTGGTTTTGTGACGATGGTCCTGTTGCCGTAAAA
AGTGTTCCGCGTCGGTGTCGGGTTCGAAAAAATAACGGTCAAAGTTTTGGGAATGAAACT
GATTGGTGAAGCTGTTTGGTTGTTTCACCAAGAAAATATTCTGTAAATGACTCCCCTTAT
TCTTATTATTATTATTATTCTCCCCAAACTGTTCATGAAAGGTGGAAATGATATTCTCTG
GGGTTATGGTGATTTGTTTTGCTTCTTTTGGCCACAAATATTTCCATTTTAACGACGCCT
CATTCGGTGTTGGGTGATAATGATTTTCAAGTTTAAAATTAATAGAATTATTTTTGTTAA
TACAACTTTCGACTGGCACATTCTTCTTTGGTGGGGAACGGCTTTTCCGAAGATACTTTT
CCATCAGAAACTGCTCGTTACTTTGATTGTATTGTTCTTAGTTTTTCCAACTCGACTTTG
TCGTCGTCGGCTTCCTTCTTCCGATCCTCCTTGGTGAACAAACCTACACAGAAACACTGT
ACGCTGGAAAAAGGTGTATTTTTCTCATTGGGAGCCACATTTAAAAGAAATGGTGAAGTC
GTATGTAATAAGAGAACAATTCTCTTATTGTGTTGTGCGTCTTTCTATTCGTTAAGCGGA
GAGAGAAGAAAGAGAATGATAGAGTTTTCAGTTGTTTTTATGATCATGTGTTTATAAATC
AATACGCTTCATTGAAAGAAAAGGTATTCTCGCTAGCACGTGCGGTTCATCATTCATAAT
GATCACCACAATAACGCTCACATTGGTTTCCTCCACGTATTCCTTTTCAAACATTACTCC
TCTGCTTTCCATTCTTGTTTTTCGCTTCATAATAGTCATGGACCATTTTCACAATGCAGT
CAAAAGTGTGTGTCATGCATTCTTCATGGGTAAAACGCTCCCCGAGTGGCAGCACACTGA
TTCTGGGAATGAATGCTTTTACATTTTCCTTCTTGTTGTTATTATTCTCCTCCAGCAAGA
CCGATTCTAGAAAGAGTTCTGTTTCCTTCATTGCCGCCTGGCTACTCTCAAACCCACACT
TACCACACAAGAATAAGGACCTCCTCCACTGCCCGTTTGTTTTGTTTTTTATTTTCCATC
ACCGACATGACGAGCAGCTTTCCAATCGTCTTGCGAGAGAGTAACGTTTGGCTATCGTAA
GAGCCTTCCCCAGTGACCAGCAGCGAGGCATGCGTGGCAAGATAACCTTCCTCCTCCTTC
TGCTGTCGGGTGGCATGAGGGTCCACGGAGGCCAGGGATTGCATTTCCTTCTTGAAGTCT
GCATTGTATTGAATATTCTGTAACGTGGAGACGGCCTCCGCGCCGGGGAGGTAACGGCTG
TTCAGAAGGTAATGGAAGAATCCACTCATGCCACCGGCGCCGCCGCCCTGCCGGCCATGC
AGCAGCCGCTCCGTCATCGCCTGCTCTGATTGCTGTTGGTAGTGATGCGCTTGTAAAAAG
GAAAAGGTACTTTTGACCACATTGGTGGCCGTCTTCGCCATGGCGGCATCCGTTTTTTCC
AAAAAACTGTAAAACTGTGGAGACGGAATGGACCCCACCTTCTCGTTCAAGTCACTTTGT
GTTTTTTGATCCTTGTATTTCATACTGGGAGAGCACTTTTGCGGACCAAAAATAAACGTC
GCTCCATTCCTCCCTACCAGCGGATTGTCCACATCACAAATAAGATAGACCCGCTGAATA
AAGGGACTCGTTTGGAAAAAGAATTGTTTCATCTTTTCCCCAATCGCCACACGCGTCAGA
CGAGAAAGGTCTTTTCCCTTGAAGGGCGTAGTCAGTAATACTTCCGTTTTGTTGGTTTCG
TCCGTCACATAAATCTCTAGTCCTAGTGCCTGCAGCGCCCCCAGGCCGCCGTCGTTGGTC
GCACTTCCTCCAATCCCTAGCAGCAGCACGATCCCCTTTTCCTTATTCTGTTTCCTCGCG
TACTGCACTGCATACTCAATGAGCTGACCGGTGCCGTGACTGGTCGTCTCGTTAATATTA
AACTGAGAAGGATCCTTTAGTAAGGGAAGACCAGAGGCGGTCGCCATCTCAATGAGGATC
ATGTGCTGCCGTGGCTCCCAGGCAAAGGTTGGGCGAGGATTACCGAGTGGCACCCCCAGC
GGTCCCAGAATTGGCACACTGGGCGGCACGGTGATACGCTCAAAGTGAAGGAGAGAACCA
TTCTCCCGCTGTGGGGTAGGAAAGGTAATACTGTCCAGCAGTCCAGCCCCGCCGTCACTC
ATGGGAGCATTGACCACTTGAACACTACTCGGCGAGGTCCCACGGTGCCGGAGGTACCGC
CGCAGTCCGTGCTCAAAGGCCTCTCCCACCTTGTAGGAGGGGCAGGTACCCTTGAAGGTA
TCGCAGGCGACTAGTACTTTATGGGGAACGGACATGAGGAGGAGAAATTATAAAAAAGCA
GTTTAAAAATAAAATAAATATGCGATAACGATAAAGCGTATAAGTGGTAACTAAGCACCT
AATTGGGAGTCCACTTTGAAACAGAAAGAAAGAGAGGGAATGTATTTGATTATGAAGCGT
CAAAAAAAAAAAGACGATTGCACGGACACAACCCATCAGGCTGCAAAGCAAAATAAACTA
TAAAGCAAATGAAAATACGATAGCAATCACAGGGATCAACAATAATAACAAACCCATCAG
TCGTCCTCCTTTTCATTGGACTTGTATTGGTCCAACTTTCCTTCCTTCAGCGCCTTTTCC
AGCTCCGCCGCGGAGGGTAACTCATCATTCAACTGTTTCACGGACGGGATTTTCTTTTCG
ACTTCAGAGGAGGAGTACACCTTTTCACTTTCCTCCTCGTAAAATGGCTTCTTTTTCTTG
TTCGCCTCTTTCACCTCATCCTTGTCGTGTCCGTAGGATTGTTTCTGGTTGGTAAATAAA
CTATGTTTCGTGCACACCGTGGAAGGAATCAGGAGGGAGGGTACGCCCACGGAGCGGTAC
AGCCACGGACTGGGGAGAAGGGCAATGCGTCTCATGGATAACGGGGTATAGGATGGGGGA
ATAGAACTGTTAGAAAAGAGAAGAATAGAAAAGTGATAGATGTGTTTGTGTGTGTGTGGA
GGATACATCAACAATCAAAATAAAAAAGAAAAAATGGAATGGGTAAATATCATACCATAT
GGGAATACTAACACAGGGTAGCAAGTATAGAAAAAACAAAATGGAATAATCTTTTTTTTG
GTTTCAACATTTTGAGAATAATAAAAAAAAACTCTCGAGAGAGTATCAATGAAAATAGTA
ACAGCCGTATAGATTCGGTTCATAAGTTATTATGTAATGTATGTATTCATAATTTATTTT
ATTTTCTTTTTTTTTACTGATTCACCTTTACTGCCGTTTGGGCAAGGACAGTATGTTCCC
TTCTCCCAGAGATGCCCTCCGCCGGACGGCACTGTTTGTATTACTGTTATTATTACTGCT
AGTGGCATTTGTCGTAGTATTATTATTATTGTTGGTTTGGAGGGAAACGTGTTGCGCCGG
AGGGGAATTGCTATTATTATTCGCTTCTTTCCCTCGGCGACGGGTTGGGGTGCCGGCATT
GCTATTATTGGTCGCATCCGCCTCCTTGTTATTATTATTACTTGGTGTGGCACTTATTTT
GGGAGTCACCCGTGTTTGCAACACAACTTTCCGTCTCGTGTTGGATGGAGAGACTGCTGG
TGGAGGAAGGTACACTGGATTGGCGGGGGAGGCACCCTCACTGGTCGGCTCACTAGCCCC
TGCCGTATTGTTGGGATTGCTGTTGATCCCCACAAGGCTGCCACTGCCGACGGCCTCAAC
CTCGTTCTGGGGGGAAAGGAGATTGGTGTTACTGTTGTTGTTATGATTCCGATTGGGCGA
GAGGCTGTCGAGCCCTGGTGGTGTCGCCTCCACCGTGAACCCCGCGGCATGGACAGGAGA
GTTGCTCGTATTATTGTTATTCACATAAATCTCCTCCATCATTTTGTATCGCTCCTTTCG
CTCTGTTAAGTTTTGGTGCACGGTGAGGAAGGAGGAGGAGATGAGGGGCGACTCCGCGGT
GATGGTGTCATCAGGGGAGTTGGGGTGACTGGTCTGCGTGGGCGGTAACGTCACCCGTCG
CGGTCGCTCCACCGTCGTGTTGTTGTTATTATTATTGGCCGCCGCGGAGGTGTTAAAAGA
GGAAAAGGTCTTTCGTCGTTTGTTCTTGGGAAAGGTGTCCCGTCGGGCGAGAGGCAGCTG
CTTGCCCTCAATGTGTAAGTCACCCCCGGCGGTGGGGTTCCGCTCCGCCAGGGCTTGCAT
CACCGTCGCCATGAATTCGGTTTGTTCTTTTGCTTTATTGTTGTAGTGGATGTTGCCCAA
CTTGCCTTCCACCACAGGTGCGCTGATCCGTCGGCCACCGGTGGAGCCGCGTGGAGTGTG
CTTGATGACATAACGTGACGTTTTGCTTTTTGTCGTAGGCAACCCAAGCGCGGGTACATC
GGTCGACTCCACCTTGGATGACTTTCTCTTTTTGCTCTTTTTCTTTTTACCGGTTTCGTC
GGTCTTCGCTTTGGTCATCTCCTCCTCCTGGCAGAAGGTGTAGTACTGCAGGGAGTTGGC
AGAGCCGGTGGTGGCGGTACTAGTGACCGATGCATTGTCCACCGCAGGGGGCTCCGTCCC
TTCCTGGCTGGCCTCCAGTGGGGAGGTGCCACCGGCCTCAGGCGGTGTGGGGGCGCTCTC
CTCCATTGGCAGCGTGACGGGGGAGGGGGCGCTGGTGTCCATGCCGTGGTTGATGGGAGA
CTGCGAGGAGAGGGTTCCCTCCACCGGCTGGCCTGGTGGACTGTCTGCCGCCTTGGCAGC
TTCTTCTTCTTCTTCCTTCGCGGTGGTATGATTATCCTCTTCATTGTGTGGTCGGTTGTG
CTCCGATGCCGCCCGTCGCATCCCCCGCCGGCCCCGTCGAACCCCACTGTTGTTAAATGC
CTCCTTCAGCTCGTCCAGCTCCTCCTGTGGGTTGGTGTGATCGGGGGAAGTGCTCCGCTC
CATCCCTCGCTCCGCCGACCGCATCAACTCTCTATTCTCCTCCTTGTACACGAGCAGCTC
CTCCATCCGTTCCATCAAGTCCGTGTCGCTGGCGATACCGCCGACCGTGGTGTTGGGATC
ACTGTGACTACTGCTATTGTGATTGCCCCCACGGATACGGCGGCACCCTCTTCTCGTCCG
CTGGGACTTCACCTTTGGCAGATCCGTCGCGCGGGGGATGTTTTGAAAAATATACTTGCT
AAATTCATAATAATTGTTGATACTCGTTTCATTCTCTTCCCCTTCCTCCTCTGGTAGATC
TTCCATCTCCTCTTCTTCTTGTCCAGGTGTGGGATCAGCTGACGTCGGGGCAGCGCCACC
CTCCCCACGTAACTCCGGTGGTAAGAACCGCAGCTCATGCTCTCTTTCAAAGGACCACTT
ATCCTCCTCCTCCTTCTCCTTCTTCTCCTCCTCGCCCTCGCTGGCGTTGGACTGGGTTTG
AAGACTTAGGAGGGATGAGCTAGCACCCGGTGGGGGAGGCGTCGGTCCTGCTGGCACCAT
GGGCGGACGGCGCACCACACGTAGGGAAGACGGTTTCTTAATTCTATTAGTGTTGGTATT
CTCTTCTTCCTCCCCTTCCGCTTTGTTTTCAGCCTCCTCCTCTTCCGCTTTGTTTTCAGC
CTCCTCCTCTGTTGGTGGCGCTCGTACGTTGGGGGAAGGTTCCTCTTCTTCCTCGTCTGC
GTTGTATTGCAACGTTCTGCTATGATTCGGTCTATCCTCCTGACTATTATTATTATTATT
GGTGGAGAGGTTGGTGACGCTGTTGTGACGGCTGTTGGGGTGTGGGGTGATGGGAGAGAC
CAGCACATCCACGGGGCTCATCGCATACGCCGTTGACGGGTAATACTCACTCATCACACC
GGTCTGATTGTTTATTATTGTTGTTGTTGTTGGGGTTCATGGAAACGGTAGACGGCGGCG
AAAACTCCGTCAAGCTATTGTTACGGGTAGAGGTGACGGTGGTCGTGATGGATCCTCTCT
GCGTCGGATTCGGTTGTAGCTGACTAGCACTGCTGGGGTTATAATTTGAATTACTGTTGG
TGTTGGTGGCTAACGAAGTCGTACGCGAGGAGGTCAGCGACTCCACGGAGAGTGGCGGTG
GTGGGACCGCATTACCGTACTTACTAGTGCTAGTGGTGCTATCGTTGCCTTGCACAAAGT
TAAGATGCAGACCACGAAAATCACTCTCCTCACCGTAGCGGTTTCCTTGCGGGATAGAAA
GGGACAGAGACCCCGGCGTAATGGGGGATACTTTTACGTTATTGGCGTTATTGTACGTCC
CACACCCAGGCGTGTTGTAAATATCGTTAATGCTGCTGCCTGGCACCACGCTGAGCGGGC
GCGAAAAGGGAGAAAGGGAGATACTCTCCGGACTATCCGAGTAGTAGTACATACCGCTCA
TATTATTCACACTCCGGCCGGCCGTACCACTGCGAGGGGTGTAAAAGATCTCCTCATGTT
ATTATTGGTATTGGTATTATTGGTGGTAGCTTTGCATTTTCGCTTGTACTCGTCATACTC
GTTAAACACATTCTCCTGCTTATTCAGCAGTGTTCGCATGAGGGTGAAACACTCGGAGAG
GGACTGAATATGCGAAAAGGAAGTTTCAGTGTTACTATTGTTATTAATATTACGACGGGA
GGACGACGGGTCGACGGGGTGCAGATCCGAAGTGGTCATGGCATTAAAGTTGGGGATGGG
AACGGAAGAAAACTGTTTCGTTTCACTTCTACTACTGTCCACGCTTATATTACGATTGTC
ATTCACACTAGTATCGTTATTATTAGCATTTTCTGCCGTCGGGGGCACTTTTTTTCCTTT
TTTCGTCTTGCTCACCTTCGCCTTCTTAATCTTCTTAGAGGAGTCTCCAATGGGTGGGGG
TGCCACGTAGGCTGCGCCGGTGCTAGTATGTGCATGCACCGTGGCAGGAGCACTACCGCT
ACCCATGCTACTGCTAATGTTGAGTGGGTCCGCCAGCTGCAGATGACTATCCGTTACATT
CTCCTGTTCCGTGTCCTCCTCCGCTGACGGGGGTAAAGAGGGCTTTACTTTACTTTTTTT
GACTTTTGTCTTGGGAGCCTTTTTATCCATTTTCTTTCTTGATTTTATTATTCTATTATT
GTTTTTTGGTTTTTCTCTACTCGATTTTTTATTGGTGAAGAAATGGGGGGAAAACAATAT
TTTTCTTCGTTATCAAACACAAATGTAAACATAATAATCGCAAAAAAATAAAAGTTGTTG
TTGTTGTTGTTTTACTGTACAGAAAACGACGTGTCGATTTCGCATTGTAAAAAGTCTATC
AATACCTTCATCGCCAAAGCATTCTTCTCTTCTTCTGTTTTGTGGTCCTTTCCGTCCAAA
AGGTGTGTATTGTAATAAATAGGTAAATTCAACCCTGACAGCAAACACTGCAAGTCCGCC
TCTTTGATTGGCGTGGAACCCATACTACTATGATCACGCTGCTCATTCCCCTCGGTCCAC
TCGTACTGACGCACAGAAGGGGATGGCCCACTCCCTTGAGGTGGGTGGGTAATCACATAA
TGGACACCATGGTAGATGAAAACCTGTTCTAACGGTTCGACATCACTTTCCGCATTGTTT
GTTATTGTTGTCGTGTGTACTCATGCTAACACATGGAAAGGTGCAAGAGAGAAAATAACA
TGAAAAAGAAGAAATACATCATTCGTTAATCATAACATTCTATTAAAAAGTTTAATTTAC
GGATCGATTTTTTGTTTGTTTGTTTTACTTCGAGGTGTTAATACATCTGTACATGAGGGA
AAGTCATCCCATTCGTAAAATACATCCATCACAATTATTTCTTCTTTTTCTTGTCATTTC
CCGTACTGTTCGCGGCATGCACGGCACTAATAATTTGATTTTCCAGTGTCTCAGTCTTCT
CTTTAATAATGTTAAAGTACTCATTGAGAAACGACTGCAAAATCGCATCCTCCGTCACGG
CACTACTTGGCGTGGTCGAGGAGAGGGAGGCAGGGTCGACCCCAGCGCCATGCCACAAGA
CGTCAATGTGACTCGCTAGCTGTAGCACATGACGGTAGGTGTTGATGAGCTGCAGTACGT
CGCTATTCTGATTGGCGTCATCTGCCCCGAAGGTGTGAATGTTACTCATCGTGAACCCTT
TCGGCAAGGAGACGGCACACCCTTGCAAGTTGATGAGAATAGGAGAAGTATGCGCATTGT
TGTTGGAAGAGGAGAGAAGACGGGCGGCCGCTGCGGAGAGCGGTACCGTTAGAGCCCCTC
CTTCCTCCTGTCCTGCATTCTTATTGCCACTAGCCCCTCCCTTGCCACCCGTCACACTGG
CCTTCTTCTTGATGGCTCCTTTTTTAGCATTATTGGCGTGGTCGGTATCCTCCTCGCCAG
GGTTGACACTGCCGCTCAACTTCTCTTCCTCCAGACGCTTGCGTTCCTCCTCCTCTTCCT
GGAGGGTCACCGAGACTAAATTTTCAGTTCCCTTGACCGGAATACTTTCCGGGGCTGGCA
TCATCCCTCGATACCGTAACAAGAGTTGCTGCTCCTCTGTGAGGTTGGCGAGTAGCGCAT
TGTTGCCGTTGGCGCCACCATTCGCGGCGACGGACTTCTTCTTCTTACCCCCCGGCCGCC
GCTGCACTGTGGTCTGCTCCTTCCGTCCCTGTCAGGGCGTTGATCTCCTCCTCCTCTTTT
TGCTTGAGGGTGAGAAACGCCTGCTGTAGTGCTGGGAGACTACCCTCGCTCATCGCCCCC
GACTTGTGCAGCAACCGACCACGCTGAATTTTTTCTTTTGCCTCCGCCAGCGCCGCCTGC
GACACCGTGCTGTAGCTCGTGTTGGTCGCGTTACTCCCACTTCCCTGCAGTGCTTTATTT
AGCAGAGTGTTAATACGGTCGTCGGTGGCATTCTTCTTGGAAGGGAATAAATCATTGGTT
TCTTCCTTTGGTGGTGCACGAAACCCAACGAGCACGTAACGCTCACTCACCGTCGAGATG
CCGCCATTGTTATTACCCGTCGCCCCACTGGCACCTTTCGCCGCGGTCGTTGTCGCTTCC
TTGGCGGCGGCCGCTCCACTACCGTCTGCACCACTCTTCAGCAATGGTTGTGCCGGCTGC
GTCACGGCGGCAGTGGACAGTCCCACAAAGGGAACACTATTCATATACGTCAATAACAGA
TTGGCGGCCGCCGCTTGGGTGTTACTGGCGTTGCTATCCTTATTGCTGTTCGCACTACTC
GCACGTTTGTTATTGGTACTGTTCGACAAGATTGGTTTAGTACCGCTGTCGCTCGTGTTA
CTGTTGGGAGTGCTGTTAGGGAGCAGCACAGGGTACAGTTTTGTCTGACTGGCCACCTCC
TTCACAAACGAGTAGGGCAGTAAGTCTACAGCAAGGTAATGAGGAATGTCTGTGGTGGTC
TGGTTGGCTGGAGGGGGCGCAGCGGACTCCTGGCCGGTCACACGAGAGACCCCACTCGTG
GCGCTCCCCGCCCGTGTCTCCCTCCCACCACTATTGTGTTGGGGTTGGTGGTTGGGTCGG
AGGTAGAGACTTGTGTCGGCCGCTAAATTCAGTAAGGAGGACTGCAACAGACCGCAGGTG
GCATCGGTAGAGAAGAGGTGCTCCTCCCTCTCTCCGTGTAGGACGGTAAAAAGTGCCATG
TGTAAGAAAAGAAAACTATTTTACCTATTATTTGTTTCTAATGTATAGGAGAGAGACGGT
GAATATATTGGCAATCGATACAGAAAATCAATAAACGTGGTTTATTTTCAGCACGGAACT
TTGACCATGAAAAAGAATTCCAAATGGGAGAAAAAAACGTTTTCAGCAACGATGTGATAT
TTTTGAAAAAAAAAATCGCTAAACAGGTATTTACCTTTATAAAATGTATTTATTTTAGGC
CACCTCGTACATGATCAGCTCCACCACGATTCCCACACCGCTCGTCAGTGCGTTCAAGTG
AAAGAGAGCCCGAAAGAATGGAATCGCCAGCGAGGTCACAAACACATTGACGGCGATGAT
ACTAGCGAATACCACACCAAACGATGTCGTGCACAGTTTGGAGAATAAATCGATCAAATC
AATTTGAGGGGATTCTTCCACAATTGTGGTGACCACCTCTTCATACTCCTCCTCCTCCTC
GTCATCGTCTTCCTCATCCTCCTCGTCGCGTTTTGTTTCTTCTGTATCCTCTTTCTTTTC
CTCACCCTTCTCCTTGTTTATTTTCACCAGTTTGCGGACGGTCCGACGGGTGTTTCGCTT
CGGCGCTAACTTCATTATTTGACCACGGATGAGTTGGTAGCTGATCATGGTGTATCCTAC
CATCCCCAACGATAGTACAATCGTGCCGTTGGCAATGACGATCCCTCGCCAGCCGTTCCG
TAGGATAAAAGCAAACCACTGCCCGGTGCAGAAGGGCACCACCATATACATGCGCTCTCC
TATGCCAATGAGGTTGTACCGATTGCGGCGCTGAAGGATGGAGGTGACGGTGTTGCCGCG
GTTGCTGCTCTTCTCGCTAGGGAACGTGGGGCTTGAGACGACCACGTTGTTGTTGGTTGG
GCGGTGCTTTCCCTCCATGATATCCTTTACCTTGCACAAGATGCCGCTGAAGAAACCAGT
CACCAGCGACACCATGAGCCACATGCCTGGCGGTGGGCGGGGTACGACCTCCGCTAGCAA
GAAGGGCGGCACCACCCGCCGTGAAGTGTTCATCAGCGGCGAGGAGGAGGCGTTCATGAC
GCCATCCAGACGGGTGTACTTGCCAGAAAAGGGAGAAGTGGTAGCGTTCGCGGTGGTGTT
GACGTGGAGGCGCTGTTCCGGGAGAAAAGGGGACGGAAGGGACAACTCCGAGTCCGTCAG
CCAGCCAAACGTGCTGCAGACACCTAGCAGCCACGACACCATCATCAACAGCTCCCCACC
CTTCTTGACGTGCACGAGGACGTACGTGGCGAACATGGCAATGGCGGAAAAGAGCAGCAC
ACGCGATACTAACGGTAGAAAGATCGCCACGTCAAACCCTTCTGGGAAAAAGTAGTAGTA
CATGTGATGGTAGGAGTGTCCGAGGTGGACGAAGCTGGTGTCCACATTGAGGGCACGGCC
AATCGCGGAGGAAACAGGGGTGTTGGAGAACACCTTCACCAGTCGGTCGGCGGAGCTGAC
GTAGGTGCCGAACTCGTCTTCAATCACAAACGACTTGCAGTAACACTCGTACAAGGCAGC
AAACGTGTAGGGCAGCCAGAGGAGGATGGCCGAACCCACTAGGGTCACGTTCATCGACCG
GTCGCTGGGGGCACGGTTCAGAGAGGACCGCATGGGAAAATACTAATAAATCCGTTATTA
CAAGAAGCACAGATTTCCTTATTATCGTAGAAGATATTGAGGGGAAAAGATATAAACTGA
AAAAGTGTTCACAATGTCGGAAACCAGCTCACTTCAGCGAATTGCGTTTCAAATAAGATA
ATGTTTATACGCATTTTAACGGTATTTGTCACTGTTTTGACTGTATTTCAAACGTGCGCA
TCGCGCTTCCATGTTTTGTTATGGTTTTGATTTTGATAGTGTCCCTCTTATTGCGCTGTC
GGGGGCTGCACCCGGCGATAGTGGTTCAGCACACGCACACCCAGTAAAGGTCCCACTACA
ATAGAGGAAATGATATAAAATATGAAAGTCTGGGTCAGCGGCAGCATGGGCACCAGCATG
TCCGGCCACTGGACCTCATTCTCTATCGTCGTCGAGAGGGGGCGCGACGCCGGGGTGGCA
CTAAAGTCAAACTCAAACACTTGTTGCAGCAACGCATTGTACTCGTCCTTGGCCCGCAAA
TTCAGTGTGAGAGAGATGGCCAACTGGGTGAGGAGCCCTAGCCCAATATAGCGACACACA
GAGTAGATGAGCTGCATGTCGATCTTGACCGGACTAGTCTCCCATTGTGGTGCGTCACCA
CCTTCTCCTTCTTCTACCGGTGCCTCCGCATCCTTGTGCACCGCTACCTCTAGCTCCTCT
TTCACGAGCATCGGCACCCCCGCCACCAGCGAGCCCATGTTCGCTCCAAGATAGCAGAAG
GCCACCTTGCAGGCAAACAGAAACATACCCCAGCGGATATAGAGCAGTAACGTACTAGAG
GAGGAGGCCGCGGAGGACGAGAACAGCGAGACCCGCAGACCGGCGGTGGTGAAGAGCACG
ACATTGTTCAGTGGACGCGTGGCGACCATGGCACTCTCCAGCACTGGGCAGGTTTGATAA
AAGTTAATCACGCTCCCTGCCAGTACCGCCGCCAGTAACAGCTCCGTGTGGGTGTAGGTG
CTGAAAAGGGATAGGGTGCCGGAGAGCAAAAGGAGCATCAGCACGGCCCGGTGTAAGGTG
TACCCTACCCGAGGGCCTGCCGCTGGCTGCTCTGTGTTCGTGGTGTCCTCCTCGGGTTTA
CTTTCGGTTGCCAAAACGCGCATGAGCCCTTTCCTTAGTAGAATCGTCGTAATGGACGCG
ACAGCGGTCGATAGGAAAATAATGCACAGCAGCAATACCGCACTACCGCCACCTTTTAAT
ATATCTAGCACCGTCCGTCGCTCTGGTCGGTAATTCTTCCACCGATATTCGTTCGGGTAA
ATGGTCTCCGACTGTTCCTGTGCGTGCCGGAAATGATTCTCCACACTTTGTCGCCAAAAC
TGCTGTAACAAGTTTACATTTTTTTGAAAAAAGTACATGTTGTCTTCCTGGACGGGTTGC
AGGAGGAGGGAAAGAATCACAAACAGCAGTAGCCCCATCACGTCCTGGCAGGCTGTCACA
CACAGTGTAAACACCGGTAGGAACCCCTCCGTGACGCCTGTAAAAGACATGGAGGAGAGG
AACTCGGGTGAACTACGCTCGAGGGTGATGGTGGCGAGCAGCACGGTGAAACACCAAATC
GTCCGCTGAATGTAATAATGATGCACGTCGACAAAGTGCTCCGCAATGGGGGAGAGATGG
TAGTAGTCGAACTTGACCTTCTTGCGCATCGTCGTGTCCACTGTGGTGTTGGTCATAGTG
TTATTGATGGCGGGTGCGGCGTCTGTCAGTCGGTCCCATTCCTTCTGTTCCGCCATAAAC
AGTAATGTGCGTAGACGGTTCTCCACCGTCACCGGCTGTAGTACCACATCACTGACGAAA
CGGAACCAGAAGAGCATACCAAAGTACACGACAGGGATGAAACACAACAAGAACATCAGC
AGTGGTCGCTTCACACGAGCTAGATGGTGGTAGTTCAGGTGGGAGCCAATCTCCAGCGCA
ATGCAGCCCAAACTGAGATTGAAGCAGGGTTGACACAGTTTTAGAATGGTCTCAATCACG
GAGGAGGAACGGAAGAGGGTGACCGTTTGGGTCCTTTCTTCTCGTTTTGCGACCACGTCC
GGGTCCTCCACTGTGTAATCCAACACAAACCGTGCCACCACGCCCACGAGAAGCATCCCC
AGCACGGGCGGAGGGGCGAAGCGCCCCATGGTGTGCCGCCAGGAGGAAGGTTTCTTTTCT
TCCTCCGTTTTAGGCGGTGATGCACGACGGGCGCTCTCCTCAGAGAGTCGCCGGAACCAC
GAGGAAAGTCGATAGGCGCAGTACAATAAAAACGCATACAAGGCAAAGACCAGCACAACG
ACAGCAGCGTTCACGATTCCCCCATAGTTACTCATGAAAGAGGCGGGAATCGATACTTCG
AAGAGTCGCATAGGTATTGATGGATTGATTTTGATTTTTTTTCGACGATGTTAATAACAA
TAAAAAATGAACGAAAAAAGATGTTTGTACTACCAAATAGGGAGGGGAAGAAAAGAAAGT
ACAGTTGATAGTAAGCAATAAGAGCAAAGATTTAGCATAACGGCATCAAATAGTTGCATT
TTTTTTTTATTGTTACTATTTCTCTTTATTTACATTTTACAACATGCTCTCTATTTCGAA
AAGAACATCCGGGTCGTATCCTTCCCTGTCTCTCGATCGGTAATACTACTCGTCCCTAGC
ATGGAGTACCCTTCCTCCTCCAGCGCCCCCATCACCGCGAGAAAGAGAAGCGACCGACCT
TGCTGATCACAGTAGTGCGAATTGAGAACAATACGTAGGCTGTGGTAGTCTTTGACGTCC
ATGGTATTATTATTACTATCCGGCCCCTCCGGGTTCGCTGCTTCTGGTTTATCGCTACTC
GTGTTATGGTGGTCCCCTTCTTCACTGGTTTCCTTTTTCGGTTCATTCTCATTGGCGTCA
TGACTAGTTTGATCTCCCACCGTTATCGCGCGAGTACCTTTTTGGTCCTCTATCTGTGGC
ACCCGCTGCGTGCTCTCCTTCCCGCTGGTGTTCCCGTAATAACTACTCATGTAAGGGTTC
CGCGCGGCGCCGCCGCCTCCCGCCCGCCCATGCTTCAGCAGTGCCTCGTACTCCTCCAGC
GCCCTGGCCGAGATGGTCGCGTTAGTCGACGACTTGTGATAGCTGCCCGTCGCGGGGGTA
TCCTCCTTTTCTCGAATGGCTCGCATGTTATTCTCATTCACGGTGGCCGTGGTCGTATCG
GCATTCGTGCTATCCAGGCCACCAATGGTGCTCGTGGTGGAGGTAAACTTTGGCGTCTCG
TGTCGCAGCCTCGTCCCACCGACCAGAAAGTTGGTGCTCTGGGAGGGCAGAGGACCTCGC
GTGCTGGTCCGCTGGGGGAGAGAGCGCTGCAGCAGCTCCACGGTATCCTGGCGCAGACCG
GCCCCCTGGATAGAGACCATCGGGGGGTTGAAGGTACAGGTGACGACCACGTTCGGCATA
ATGTTAAAACGGTGTGGTGCTGAGGTGGGAATGGGGGAGAAGGGAATGTGTCAAAGTTAA
GGGGCGAAGGGAAAAGGGCAAAGACAAATGGAGTGCCATACGAATGACAATAAATAAGTG
TGTTCCAATGTATTTATTTAAAAATAGCTCTATGCAACAGAATAAAAAAAAAAAGAAGGA
GTAAAAAATGATTCTTGTTCACCTTCTATTTCATCCCTAATATTACTCTTTTATTAGTAT
CATTGATGATTAGTAGTGCTCTAAGATGCGAACTTTCTTTCCCTTTTCTTTTGAGGATTT
TGTCTTGTCAGAAGTGGATTGTGTCTTATCGATGGATAACGGTGTGACTTTGGAGGTATT
CCCACTCGCATTACTATTATTATGATTACCACCGCTAGACAAGTACTCCATCCCCCTCAC
TGCGGACACAATCTTAATACGCTTTTCAGGGGCACGGCCGGAGGAGCTACTTTCGTTATG
GATATCTTATTATTATGATGATTCTGGGAGAGACTACTGTTGGTCGTCTGATCCAGACTG
GGGGCCTGCACACTACTAATCGTGGTGTCTCCGGGATGGGCGAACGTTTCGACAAATGGC
AACGTACTGCCCTCCTCCTGCGTGGTGGTTGGTTCGTCCAGTCTGCGCTTCTTCTGTGCC
CGTCGCGGGAATAGCTCCATCATGGAGGAATCCTCCTCTAACGAGAAGGCACCGCGCTTG
CCTTGTGGGGGCGGTGGTGGCACGTCGGTCATGTACTTCCCTAATCCCACTGCGGAGGGA
TTTCCATTCCTACTCTCGTCGTTCACATTCACGGTATGCAGTGTAGAGTTGGGGGCGGCT
ATACCAGACGAGCTATGGTACAGTGCCTCCCGTACGCCCTCTGCGGTGAAGGTGCCGTCG
GGGTGATACAGCGTACTATTCTCGTAGGGTTTCTCCGCATTCATGGGCAGTAGATCCTCT
CTTGGGAGGTTCCACTCTCTCGTGCGGCTCTCCTTCTCCTCCTGGTCAGCCAATGGTGCC
GACGCTTCTGGGGTGAGTTCAAGACTAAGTACATTGGAAATTAAACGCTTGACGCCCCCC
TTGAAGTTCTGACGGACATACTGCGACAGCTGACGCACCGACCGCTGCAGCTCTGTCCGC
CGACAGTACACATAGTCGGACGACAAGCTACGGTCGGGGTCGTCGTCCTCGTACTCTTCC
CTCCCCCTCTTACGCTGGCCAATCCGCCGCTGTAGGTCGGTGAGTTTCTTCTCCTGCCGC
TCCTCCTCCCACGCGTCTGGCACCACTGGCACCTGAAATGCCTTTTCCACGTATTGGAAG
AAGGGCATCCCACACAGTCGCTTCCCTACCGCGTTCAGTCTGTAGGAGCCTGACGTCGTC
GGGCTGGTAGCACTGTCCTTCTCCTCTGTCTTTGTATCGTCTGCCTTCTTTTGGGCCGTC
CCGTCGAGCTCCTCCTGGGATAGATACGGGAAGGCGACGGTCTCCTCGTCAATCAGCATC
GACTCCCCCGCGGCGGTGTGCTGCCCCAGTTGCCGCCAGTTCAGCGACAGCAGGGAGGAC
TTCCCTAGCACTGCCACCCAGAGCCGTCGCCCGTGGCCGGCGGTGGTGCCGTACTGGTAG
TGAGACTCCTTGTCGTTCAGTTTGCCAAAGGTAAGCAGAATGGCGTGCTCCTCCTCCGCG
GTGCGAGGGGCGTAGGTGGCGGTGGGGGACACCTCCAGTACCCCATCCTCTCCTACCGCC
AGTTGCTGCTGGACGGCGGTCATGGCCTCGGCGGTGTGGAAAACCGCGAGCAGGAGCGGT
TGGTAATAGTGCGGGCGGGTGTACCGGTACGAGGACGTCGCCTTGAAGCGAAGTAAACCG
AGGAACGGAGAGGCACCCAAAGAGGGGGCGGCGACGACACGCTCTCTCCCATCTGCCTCG
CCCGCGTCGGCATTACGGTACGCATTAAAATCGGAAGGAAAGTAATTGACAATTTGTTGA
ATCTTCCGGATGAGACCGCTAATTCTATCGTAGACGACAGGGGAGTCCAGCTGGGGGTAA
TCCCCTTCCAGCCGTATAAAGCAGCACAGCCGCTGGAGGGACTCTCGCTCCAGATGAAGG
TGTTCTAGCAAAGGCCCCTGGACGTCTCGTGCGGCAGTCCCAAGAGAGTGAATCGTTTTG
GGTTTACTGTTCATGCTGTCTTCCACAATGGACACTAAAGGACGCTGGTCCTGCGCTACG
TTTCGATTACTATTATTAATATTATTGATGTCTCGCATGGAGGAAGGGTACGGCTGTTGT
GGAGCAGTGGACAGCGGATGGACCGCATTATTGTTAAAGTTATTCATCGTCGCGTTACCT
CGGTTGTTGAGATTTGCGCCAGAACCGATAGGCCCTAGAAAGGTGTACTCTGTATCGTCA
TCATGACGATTGCTACTATTATTATCTTGCAGGTCTACCTTGATGGTGTTGGACAAACGA
TCCGCGCCGTAGCGGAGTGGTCGTCGAAAGTTCGCGCTGCTGTTCCCATAGTGTATGGTG
GTATCCTTCTGATTCATGGCGCTGACGTTTTTGGTATTTCGCAGTAGTCCTCCAGTATTT
ACACTCGTGTTAATACCTAAACTGGAAAATCCACTCACTGAGGTGTTCTGTCGAAGGTTT
GTACTAGTGTTCTGGCTTTTGTTCCCGATGTTGCTGGAGTCCAGGAAGCTGCTGTTTTCG
ATTCTACTGGTTGTCGATGCATTGATAGCAATATTGTGATGTAGCATTGGATCAATAAAA
AAGCACTAGAATGTGTATAAACAATTATAGTTTTAAAAGGCAAAAAATTCTCTATTTCTG
TTGTTGGAGTGCAAAAAAAAAAAGGGGGGCATATGGAGAGAAAAGAAATATATTTTTTTT
CGCGTCCGATCCATCCGTGGACTTCCGTGCGAAGTATCCTACCATTAACAATCACTTTTT
CATGATGAAGTAAACCGTATACATTATGATGACCACTGTTATACTATTTGTTTTTGAAGT
TTACAGAAAATTCTATTTTATACCCCCCACACATTAGCACACACAAAAAAAAAGGAAGAA
CTGGGCACAATATAATTTTAATGGGGGGAAAATAAAGGTGAGAAGCATGCTGTTGGTTGT
TTCTTTTGGTGTAAACAACGGAATACATAATGTACATAATATATATTCGTAAAATATATA
TTCGAAAATAAAAATAAAAACATTCGAATTGGCTTTATTTCTAATAATGGAATTCTAAGT
TTTTTTCTCTTGAGGTCGATTTACCATTTTTGCCTTCACGTGTGGTTAAAAACACACCTA
TTCTATACGACCCAACACACGAAGGAGTGGAGGATGGTTATGATTATTATTATTATTTAA
AACGTTCCCTCCTCCGAGATTAATGTATCATTCAAGTCGTCTATCGTGGAGGATGCATTC
ACCCTCTGTTCCGCCACATACTCTAACCACCGGTGCAGCTCGTTATTCTCGCGTTTCAGC
AAATCGTGCTCGAGCAGCTGAGCCGCCGTCCACCGCTCCTTGGGGTTCCGCTGCAGACAG
CACTGCAGAAAGTTCTTCACCAATGGGACATTCACGTCGACATCAAGCGGCTTCGTGAGA
GAGAGGGAACGGTAGAAATCGCACAGTTCAGCGAGCCCTAGGCCCTTCTGTGGCAGGCGG
ACGCACAACACTTCCGCCGCGATACAGCCGATGGACCACACATCGCACGCCTTCCCATAA
GGTTCCGCCACCACAATCTCCGGCGCCATGTAGGTGAGGGTTCCCTTGAAGTTGTTCAAG
TCATACGACCGGCGCTTGTGGACGGCGGTACCAAAGTCCGTCACCTTGGCGACCCCATCA
CGGAAGAGTACATTGTCTGGTTTCAAGTCACGGTGGACGATGCGCTTCTTGTGCAGATAC
GTGACGGCGGAGACAATATCGAGTAGTATCCCCTTGACCACCTGCGGGTCGAGCAGCTTC
TCTTTGTTGACCATGGCACTCAGCGGCGGCTCGCTGCAGAGCTCCATAAAGATGGAAATA
CACTTATCGTCCCGCTCACAAAACATGTAGCGCACAATGTTGGGGTGCGACAGGGAAGAC
ATAATCTCTACTTCCTGGGCAATCTCACGCAGTTGTGGGTTGTTGGGGTCGTCCACCTCG
TCCTCCTTCAGGTAGATGCACTTGACGGCACAGAGGGCGCCGGTCTCGATCATCTCTGCC
TCAAACACGGTACCAAACGCACCGGCACCCAACTTGCGGCCCAGTCGGTACGGGGGAACC
TTGAAAGGGGAGTGCGCCTCCACCGGCTCCTCCATGTCCTTCATCCCGATACCACGGAGA
ACGAGGGTGTTGAGATCTTGATCGGTGAGGGGAAACTCAAAACAGGACTCCAGCGGGGCA
ATCGAGGGGAACTTGGACAGGTCGGAGGAGAAGAAGAACACGGGTCGTCGTTCACTCAGC
CAGACTTTCACCAACTGCATGCCTAGCGGGTTCTTGGCCAGGTCGGGGGCATGAATGAGA
AACACCTTGAAGCGCTCCGAGGCTCTCCGGTAGGCAGTATCTAACGTGTTGAGCGTACCA
CTCAGGATGAGCAACTTCCTCGACCACAAGGACAGGACGAGGGGGGAGAGGACGGAGTGG
TCCTCGCAGTATAGTAGCAGCGTCACATTAATCTCATCCTGAATCGTCCCCACCTTGTCG
TTAATCGCATTATCGCGGAGAACCTGTTGCTGGTGCAGCTGCATACTCAGTTCATACTGT
TCATAGAGTACGTTGGAAATTAGCATTTGATTGTTTCTTTCCTGTGAAATGTACAAGTCC
TTCTGCTGTCCCTGCGGTTGGTACGCCTTATTCACGGTGGACACTAGTCTGTCTTCGCCG
CCGATTTGGTCGTTGAGGTAGTGTCGCATACCATTCATATGGTGATCCTCCGTGGCAGAG
TCGTGCTGATTGTTCATCCACAAGTCCTCCGTGTAGTCAAAGCTATCCTGCGGTATAATA
TCCGTCGAGCTGTCTTGTTGGATAATGTTCTTGGTGATCGTGAGCGCCTCCTGCCGGAAG
AACACCTCCGCGGCGTGGGCGTAGGTGTTGTGGTGCCACAGCAACACACAGATACCATAC
GACACTAATACGCAAACTCCTAACACGGCGGAAAGAGTCGCCACCACCGCTACGCCTTTT
GGGCCAAAGACGCCTAAAAAGATGACACATAAAATTTCAACGAGGGAAAGACCAGTGAGG
ACGCCAAAAATGATCCAGCGGTTCTTGCGATCCCCTATTGCCTGTCGCAGCCAGAAGAGC
CAGGTGAAGGTGATGGTGCCGTTGAGATCCTCCGACACCGCCGTCACCATTTGCCTAGAC
GCCTCCGTGAAGGTTTTGGACTCCGGTCCGTTCTGCTTCCACGTCCGTGCCACGTTGCTG
ACAATCTGCTTCAGCTTGGGGTTCGACCACCTCGCGAAGAGGGGGTTGAGCACAACCCCG
TTTACCTCAAAGACGGCGAAGGCGACGCAGAGGAGGAGGTTCTGATAGTCAAACTCCGCC
ACACTGTTCCACGAGGACAGGAGGGAGGGCTCCTCCTCGAGGACGTTGCCCCCCATCTGC
TTCACCCCCCGCGGTGCCCGCAGCAATCGCTGTTGCTGCTGCTCCTCCAAGTCAATCAAC
CGCACCGAGAGGTAGAAGATGAGCGAGTTCTGCAGCCACTCCTGCGGGGCCCGTTCGTCC
TGCGGCGGCTCCCCAAAGTGAATCTCACAGGAAGAGAGGGGGATCACAGGGCTAGGCTGG
AGGGGACGGGTGGCGGCGGCGGAGAAGGAGTTCGTGGCTGAGGAGCGCAGGAGGGTGCCC
GGGGTGTCGGAGGTCGGACTGCGTGGTGCTAACTTCTGCTGTGCGAGGGGGTTGGCGGTG
ACGACTGGCGGTGGGGTGCTGGACTTGGTAACGGGTGCACTGCCGGCCTTCCCATCCTTG
GAGTCTAACGAAAAGTTGGACGGGGAGGGAACGCTATCTCGCTTACCCGCCGGTACCGTG
GAAACGGTGTCCTTGTTATTTGTACTATTGCTGGTCGAAGAAAGCGGTGGGAGGTCGAGC
GCCTTCTTGGTGACCCCTTGGGCAAACAGCGGGTTCTTGTTTTGGACTACCTTCTCTGGG
GTAGGCGGTTGGATCGCCTTGGGAGAGTCCACCAGTACTTCTAGCTCCTCGTCGTCGTGT
GAGGCGGTGGGTCCCGACTGCAGCGAGGCCCTAGCCGCCTCTTGTACCGTCATCTTCTTC
CCGCCGACGGTGGAGGACACCAGTGAGGCGGGCGAGAGGCCCAGCGGTCGACTAATCATC
TTACTTATATTATCCGCCGAGTTGCGCTGCTTCCCCCCTAGCGGTGGGGTCTCACTACTG
TGACGACGTCCCTCCTGCGAGGGCACGTTGGTCGTGCCGACTGGCGTACTATTCCGCTTG
GGGGCCGTCGGCGGTGGCTGACTGGTGCTATTGCGTACCTTCTGAAGATAATCCGAGGGT
AGCTTGGCTGCTCGTGGCGGAGGGGCAGGAGGCCTCGCCCCGTCCGAGGCGGAACTACCA
CGGCTACCAGCGCTGCCGGTCTTACTACTCAATCGCTCCTGTCGAGGGCGCTGGGCCTTC
TGGGGGCTCCGTCCGCCTTCGCTGATCCCCTCGCCCGTCAGCTCCTCAATCTGTAGAGAG
TGACGACGGTTGGGGGCGAAGACGATTCTTGTTTTCTTAGGGGAAACGCCGTTGGAGTTC
ATCTGTATTCTAGATGCCTAAAGGAATGACACACTCCGGTGGTATATTTAGTTATTATTA
ATATTTTTTTTGGTTTGTTCTTTCTTTGTGTTGCAGAAACAAACAAAAACAAAAAAAAAG
AAAAAGAAAAAAAAACTGATCAGAGAAAATAAAAAGTTTGTGTGGGTCTGATCCATTTTC
TTTTCGTCATAAACAGTGATTCAAAACATAGAAACCAAACCAAACGATTTGCGTGTCACT
CTAAAAAAAAAAAAAAAATGAGGAAAAAATCGATAAAGTGGAAAACGCTAAATAGCACTT
TTTTTTTTTTTTTTTTGATTTGCCCTTTTTGTTTATGATTCGTTTTGCGATAGATATATA
CAAAAGAAGAGATGAAAAATAATAAAAAAAAAGAATGTGAGAGTGTCAAATGTCAATGGG
GTTCGTATTGGCAAACTTCATTGTTGTTGAAAAGGTTTCCTATACGGCTTCCGACGTCGA
TTTTTGCTTTCGACGTCGGCGATAGAAACTGGAAACCCCCATTCAACTCAACGATGGCAA
CTTTAACAAGTGTCTTACTCTTCAAGAAAAGAAAAAAAGAAGCAAAAAAAAAAAAAAAAG
AGAAAAAACAGCTAACCATCTTTTGTCGTTTTTGTTTTAGGGCGTAATAGCAATCTTCAG
CACGCCATCGCGTTGGTTCGCGAAGAGGTCGTAGGCCTTCTCGATCTCATCCAACTTGAA
GCGGTGGGTGACAAGACCCTCCATGTTCACTCGGCCAGACTGCACGGCGTTGAGCAGACG
ACGGAGGCGCTCGCGTCCACCGGGGCAGAGGCCGAAGGACACCTGTTTCGCTGACATCCC
CATCGCCAGACCTTCCATCGCCACCGACACGTTGATGTCGTGGGCGTAGACGCCGAGGGA
GCTGAGGCGACCGCCGGGCTTGATGCTGCGGAGCGCTTGATCAAAGGTAACCTGTGACCC
CAGCGCCTCAATGGCGACGTCCGCCCCACGGCCCTCCGTCAGCCGCAGCACCTCCTCCAC
CGGGTTGCACTTGTTGTAGTTCAGCGTGTGGTCGGCGCCCATCTTTTTGGACATTTCCAG
ACGGTTCTCGAGGCCATCCACCGCGATGATGGTCGTGGCTCCCATGAGGCGGGCACCAGC
GACGGCACAGAGACCGATCGGCCCTTGCGCAAAGACAACGACCGTGTCGCCGACCCGCAC
ATCCCCATACTCGGACCCCAACAGACCAGTGGAGAGAATATCCGGCACACTGAGCACCTG
CTCATCGGTTAAGTTCTTGGGGATGCTGGTGAGATTGTAGTTGGCATGCGGCACGATCAT
GTACTCTGCCTGCGAGCCGTCGAGGCTGAACCCCAGCTTGCATCCCTGGGCCGGCCCCCC
GCACTGGGTCCCCATGCCCTCCTGGCAGCTGGAGCACGTTCCGCAAGGGGTAATGGCGCC
GCAGAGCACCCGCTGTCCGACCTCGAACCCAGTCACACCTTCTCCCAGCTGCACCACCTT
GCCGATGGGCTCGTGGCCGACGGTGACGCCCACCTGAGCGGCGGTCTCACCAGAGCGGAG
ATGAATGTCACTGCCGCAGATGGTTGTGGTGGTGATCTGGATAAGGGCCTCCCCTAACTT
GGGGACCGGCATCGGCTTCTCATCGAGGGAGATGTCGCCCGCTTTTTTGAAGACCGCGGC
TTTGATCGTCTTGGGAAGAAGACGAGTAATGGACCTCTGAAACATATTTTTTTGGTATTT
TGTTGTTGTTTTCTGAAATAAAATTCGATAATAAATCTTGTGGAAAAGTGTGTGTTGGAG
AGAGAAATGAATCAATGACGTTTGGGAAAGATTCCGCCTACGTGTGCTGATAATCTACAC
ATTCTCAAACTTCAAAATGATCATATTGAGCAGAAAATACAACCGAAAGGAAATCTGAAT
AGCAGCAAACAATTAGCATTCGACAGAAATGTCTTGCCGAAGTTGGGCACATTGTTTCTT
CAACTCCTCAATCTTCTTTTCCCTTGCCTTGAACCCAAAAATGCCGTAGCTGCTCTCCTC
ACTCAGCAGCGCCAGTCGGAAGAGGTGCGCCTTCAGCACGGTGTTCCGGCTGCTCTGTAA
AAGGAAGAACTCATTAATAGTGAGAGTGAGTCCGTCCAGGGGAGTGGAGGTGGGGTCGTA
CCCATCCTCGCTGTCGCTGTCGGAGTAGTGCCGGTTGGGGGAAATGTACTCCAGCGTGTT
GGGTAGACTGATAAGGGAGGAGGTGTCGGCAAAGTAACTGTCGGGTAGGGACATGATGAA
AGAATCTAATCAAACTATTGAGAAGAGGTGGAGTGGAAAACAGGAAGTGAAAAGTTGTGG
AGAAGCGTTTCATTACTCAAACGGCTGGGACGACCAAAAGAAAGAAAACGGAAAAGATTC
ATCATAAAAATCAAGTGATGGACGTTTTAAGCACGTAAATAATATATGATAATTAAAAAA
AATCAGCGAAAATAATTAACAAAAAAAAAAAACTTTTACAGAGTGAGAGGTAGAAGATAA
TAATAAAAAAAAGTTTACACTAAATAAAGAACTTTTTTTCGCTATTATTCCCTTTTCATT
TCGAAACGAGAGACAATATACAGAAAACAAAAGTTCAGAATATGTTTGCAGTCTTTTTCT
TTTATCATTACGGCAGAGAAAGGGTCGAAAAAAGAAAAAGGGGAAAAAAAATGAACGAAC
ACATACAGAAACTAATAAACACAAGAACGGAAACGTAAACACAGCGAAATGTGTCTCACT
GTTGTATACGTTATGTTCTTGTATTTTTTTTTTTTTTCTTGTTGGTGTCTATCATTCATT
CCTGCTGTTAGAAGGTTGGTAAAAAAAAAAATGGGGGCACATCGATACACAAATCGTCAT
GCTTCCAATATATTTGTGCGATGCTATCCAAATCCAATGCGCCTATTCGTTTTTTTTTTT
TTTGTCATATTATTATTCTTATTATTCCTCACTAATCGCCTTAATCGTTTCATCGCTCAG
CCCTTCCTGTGGGGATACCTTGTGGTTGGGCTGCACGCACACGGCGTCGTCGACAATCGT
CAGCTTCACCGTCTCTCCTTCACGGATACGGCCGTCGAGGAGCATAATGGCCAGTTGGTT
GAGTAACTCCGACTGCACCAGGCGCTTGAGGGGCCTGGCGCCGTAGACCGGACTGTAGCC
GTTGGCCCCGAACCAGTCGTACACCTCTTTTGGTACTTCCAGGATAATATTCTGTTCCGT
TAGCATCTGCTGCACCTGCTGGAAGAGAATCTCCACAATGGACCGAATGTTCTCGCGGTT
GAGGCGGTTGAACATGATAATGTCGTCGAGACGGTTGATGAACTCGGGAGTCATGCGCTG
TCGCACCTGTTGCATCACCTGGGGCATCGCCTCCGTGCTCGCCGCGCCCTCCGGCAGCTG
GGCAATAATGTCAGCGCCAATGTTCGAGGTCAGGATGATGATGGTGTTCTTGAAGTCCAC
CTTGCGCCCGTGACTGTCGGTGAGGTGACCCTCGTCTAGTACCTGCAGAAGAATGTTGGA
CACACTGGGGTGCGCCTTCTCAAACTCATCGAAGAGGACAATCTGATAAGGACGACGGCG
GACCGACTCGGTCAGCTCGCCACCTTCCTCGTACCCGACGTAACCCGGGGGCGCGCCGAT
GAGACGGTGGACGGAGTGTCGCTCCATGTACTCACTCATATCGATACGGCAAATGAAGCT
TTCATCGTCAAACAAGAACTTGGCCAGTCGCTTACACACCTCTGTCTTACCCACACCGGT
AGGACCGATGAAGAGAAAAGACCCGAGTGGTCGCTTGTGGGAGTGCAGACCAGCGCGAGA
GATGCGGACGACGTTCGTGATGGACTCAATGGCGTTATCCTGACCGAGAATGGTCTTCTT
CAGTTCCTTATCCATATTAATCAGCTTCTCACGCTCACCAGTGAGCAGTTGAGCAACGGG
AATACCGGTCGCCCTCGCAATCACCTCGGCGATATCCTTGGAAGAGACGGAGTCGCTCAC
CATAAAGTTCTTTGCCTTGGCCAGCTCCTTATCTTTTTCAATCTCCTTCAGCAGTTTGGG
AATCTCCGCGTACTGAATCTCGCCCGCCCTGGCAAAGTCGCCGCCGTTCATCGCCTGCTC
CAAGTGGTGTCGCAGGACATCCAAGTCTTCGGTACGTTGCTTAATCGTCTGGAAGAGACT
CTTTTCCTTCTTCCACTGCTCTTCTAGGTGGTCGTACGTCTTCTGCTTCTCCTCGAGGTG
CTGCTGGAGGTGCTGGAGCTTCTCCTTGCCGAGTTCGTCCTTGTCCTTCTTCACGGCCTC
AATCTCAATCTTTAGTCGGATCAGCTCACGCTCGACGGAGTCCAGTGCCTCGGGCTTCGA
CTCCTGCTGCAGTCGCAGACGACTGGCGGCCTCGTCAATGAGATCAATGGCCTTATCGGG
CAGACGTCGCTCGGAGAGATAGCGGTGCGAGTTGACGGCCGCGTACACCAACGCCTCGTC
CTTGATGAGACAACCGTGGTGGGCCTCGTACTTCTCCTTGATACCGCGCAGAATGGAAAC
CGTCTCCTCCACGGTGGGTTCGGTCACGAGGACGGACTGGAAACGACGGGCCAGGGCGGC
ATCCTTCTCAATGTGCTGACGGTACTCGTCGAGGGTGGTGGCGCCCACGCAGTGCAGCTC
GCCCCTGGCAAGAGACGGCTTCAACAGGTTTGCGGCATCCATGGAGCCATCGCCGCTCGA
TCCCGCCCCCACCAAGGTGTGCAGCTCATCAATAAACAGAATGACCTCCCCGTTGGACTC
GATCGTGTCCTTGAGCACACCTTTCAGGCGCTCCTCGAACTCACCCCTGAACTTGGCGCC
GGCCACGAGACTACCCATATCGAGGGAGAAGACCTTCTTGCCTTTAATACTCTCCGGCAC
CTCTCCCTTGTTGATGCGCTGCGCCAGACCCTCCACAATCGCGGTCTTACCCACACCGGG
CTCACCAATGAGCACTGGGTTGTTCTTGGTACGACGGGAAAGCACTTGGATAGTACGGCG
GATGATCTCCTCTCTGCCGACGATGGGGTCTAACCGACCTTGCTTGGCCTCCTCGGTGAG
ATCACGGGCATACTTCTTCAGAAACTCTCCCTTGGGGACGGCATTGGGGTTCACCCAGGT
GCGGCCCTGCTGCTGACCGTTGTTATTATTATTATTGCCACCGGCATTGTTGTTGTTGCC
ACCGCTACCGAAAGGGGTAACGCTGGACTGGAAGCGGCGGGCGGTGTGGAGGGAGGTGTA
GTTCATGGGGCTGCAGGCGGTGGTGAGGCGAAGACTGGCGGTGTGAGGGGCGCTAAGAAG
TGTGTTCGATAGGCCACAGGCAACCCCCACGAGGGCCGGCTTGATGGTCCTCCGCATGAA
ATAGTTATTGCGCATCATTTTTTTGTAAATTGGGTTTATAAAGGAAATAAATAAATAAAA
TAAGGCTTGTTGATGTTAATATGTGAATAATAATATTATAGTAAAAAAAAATTGCTTATC
TTTTTTTCTGTTAGTTTCTTCTGTTTTATTAAATATAGTTTCGCAAATAAAGCAAAACCG
AATAATAATAATAAAAAGTAAGAAAAAAAACTTCTTTTTTTTATACTTGATACTGGATTA
AGTTTAAAAAAAAAAAAAGATGAAATAGGGCTTGAAAATAATAGCTTTTTTTTTTTTTAG
CTTCGCAAAACCTAGAAACAGAAGAAAACATGGAAGAGAAGAAAAACAAGTAGAGGAGAT
AGGTGAAAAGATACACATGTGACGCAGCCGAAACAATTAAAATATAAATAGTAAAATCTT
TTAGATGAAAAAACACAACCACACTATAAATAATAATAATAAAAAGGAAGTTAGTTGGAA
TTAGATACAATCATGTCAAACTCAAAAAAAGAGGGCGTTTTAGAAAGTTGGCAAAAATTC
AAAATAGAAAAAAAAAGGAGAAAAATACATGTTTATATATTTCTTTTTAGAGTAATGGGG
AAAACAATCGGTCATTGTCAAACACCTTGACCAGATGGCCTTCCTTATTTTTCTTGTCCT
TTGCCATGTCGGCCAACAAATTGTGAATGAGGAGTGCCATGCGGTACTGTCCGGCATTAG
GGCGGTCCGCCATCGCGCTGGGGATACTCCCACCGGAACTGACATCCGTGACGTATGTCA
GCGTGAGGGAACCGTCCTTCTCCTCTTGGCCCATCAGGAAAAAGACAAACGTGCTCCCCC
GCACATACCCCTTGTCTTCCTTGGTCAGCTCATTGTCGCCCGTGTACTCGATACCACACT
GAATAAAGACATTCAAGTCGTCCTGGTCGTCCGTGGCGGACTTGGGGCGCACCCCCAGCG
CGGTCTGCTGCTCCGCATTGAGCAGGACAGCACGGGTGACGTACATGACCATCTGGCGAG
GGGCAATGAGAATCATTGGGATCTTGTGAATGGACTTGTTGACCACCACATTCGGCCCTA
GCCGGGCACAGTCAAATTGCATCGTGAGGAGCGGACTGTACTTGTAGATATTGGAAGACT
TGGGGTCGTCCTTGTTCTCGGGGTCGTCGAGGAGCAACCGCTCCATGACAGCACAGGTGC
AGTCTGGGATGGAAGAGGTGAAGCGAACGGCCTTGTAGCCCGTGTTGGGGCTGGGCCGCG
TCTCATACAGCGTGCCAGTCTTTTTATCTTTTTCTTTTTCCTTCCACTCCGTCGACTTCC
AAAACTCCACACACGAAGTGAGGATGCGATTGAACGCGTGGGTCTCCTTGCCACCGGCGT
GGTTGATGTGGAGGGAGGCCAGCTCCTTCTTGTCCGCCTCGGTCAGCTCCTCATCCTTCT
TGACAGCGGGTCTGGGGGGTCGTGGGATTTCCTTCACCATGGTTTACTTGGTTTTTTTTA
TATTGTAGAAATAAAAAAATGTTTGGTATAGATTTTTAAAAAAAAACGATTGCGCTAGGC
CGTGTTGCTTTTGAAGAGGAGAGAGAGAGAGGGAAGGGGTGAAGTGTGGAGTATAACAGT
ATTATTCATTGAAAGATTCTCTAACATGGCTCCCCCGTTAGCTGTTTTTTCATACAGAAT
GAATAATACACGAACAATGCAAAAATTAAAGATTTGTTTCTTTACATATAATACATACCA
AAATTAAAAAGCAAGCATTCGTATACCATTCCCGTCCTAACTCGGGTCCATGGGAGGGGC
GACAAACCCAGTGTATTCATAGTCCTCCTCCTCCTCCACTTCACCGGCGTCACCGTCGTC
CACAGGCCTGCCCGCCGCTCGCCCCCGCTCCTCCCTTTGACGGTTGACGGCGTACTCCTT
TGCCATCTCGGTCAGCCGTTCCCGCAGCTCCTCATGGCGGGCCTGATACAGGTCGGACTG
CTCGCGGTAGTACTGCAGACTTTCCTGTATCTGCGCCACCTGTCCCTTCTTCTTCACCAG
GTTCTGCTGGTAGGCAGAGAGCTGCTCCGCTACCTCCGGCCCTGGCTGCTTCGCCACCGT
CGCCTTGGCCTTGAGGTACGCCTGCTCCTTGATTTGGATCTCTCTCTCCCGCTCCTCCAG
CTGCTGACGGCGTTGGTTCAACTGACGCTGCAGCCCTTGCACCTTTTCGGTGAGGGCGTA
CGTCTCCGGGTCGGACCACATGAGCTCTCTACCGGGGTGAAGGTTCACCTTGAGCTCCTC
TTCGTTGAGCAACGCGCGCACCTGCACCTTTTCTTTTTGAAGCTCGCGGGTCGCGGTGTT
GACCATAAGGCGCAGGTCCGGCAGACGGCTCGCAAACTCCTTTAGTTGCGCTACGTCATT
CTCCAGTTGGGCACACTGATACTCTAGCTGGTCAATGTGCTGTACTCGCTCACGGTAGGC
CGCCTCCCCCCGCTGCAGGAGCTGCTGCTGCGCGTGTATCTTTTCATACAAGCTGGTCAG
TTCCTTCTCACGCTGCGTGGTGCGGTTGGCGAGGAGGTCCCTCTCCTGGATCATATCGCG
GTATCGTCTACGCTGTTTTGCTACCTCATCGTTCGCCACAACGAGCACTTCGCTCAACTT
GCCCAACTCTGTATGGAACTGTTCCGCCGAGCGTTTCTTCTTCTCCGTCTTGCGCTTCAG
TGTGGATATCTGAGACTCAATTCCCTTCTTTTGGCGGAGCAGTCCCTCAATGACGGCATC
CTCGGCAATGATCGCCCTATCCCGCCGCACCAGCTCCTCCTTGAGTTGCTGAATCTGATT
GAGAATGAGTTGGAATTTCTTGTTCATCTCCGCCAACTCGTGGCGCAGCTGACCGAGGTG
TTTGCTATAGGTGTTCCGCTCGGTGACGACCGCATCGAGCATCGTTTGCTGCTGCTTCAG
ACGTGCCTCCACATCCTCCACTTCCTGCTGGGAGGTGGAGATTTGCTGTTCCCGTGCCTG
CACCTCCGCCAGCATGTTGGCGCCCGCCAGTGCATGACGCTTGAGGTCGTCCTCGTACTT
CATGCAATCTTTCGTGACGCGATAAATGTCCTCTCGCTTCTTTTGGGCGTGCTCCTCGAA
GGCGGTCAGCTCATGCTGCAGATGACGCTTCTGTGCATCCTTCTCCGCCAGCCATGAGAT
GTTACGCTGGGTGGCTTGCTCCGCAGAGATAAAATCTTGAAACAGTAAATCCCGCTCCCG
TTTGATACTCTCCAGTCGTTTGGAGTCTCCCTCCGCCAGTAATTGTACATCCAGCAGTTC
TTTTTCCTTTGCCTTTATCGCGGCCTTGAGGTCCTCTCGCTTCTGGTTCACCTCCGCCTG
CTTCTGTTCCTCCACCACATTGCGGCGCTGGAGGGACTCTAATACTTTCATCTCCTTCAC
GTACTGCTTGTGGGTGCCAGAGACGTTGGACTGCAAGGTTTGCAACTCCTTCATCGTTTC
CTTTACCTTGCGCTGCATTGTGTCGTTCTCCTCGTTGCAATCCTGTAACGACGTGTTCAC
GTGTTGGATCTGACGGGTCAACGTTTGGTACTCCTCCCGGAGTTGGCGTATCTCCTCCTC
CAGCCGGCGGAGGTCATCGCCGTGGTTGGCGTCGTCCTCCCGGAGCTCATCAATCTTCTT
CTGTTTCGCGGCGACGTTACCAGAACGCGATGCCACCTTCTCCCGTAGTTTGCGTAGGTC
GTCCTCCTTCTCCGCCTTTTTCGCCTGAATGACCTCTACCTCTGCCTTCTTGGCGGCGGT
GGCCTCATAAATCGCCTTCAGCTCCGCGTCGTGGGAAGATTTGTCCTCCTTCATCCGCTG
GATGCGGCGTTGCATGGCGGCAATGTTGTTTTGCACCGACTGTATTTGCTGTTCCTGTGC
CTCTTTCTCTTTCATCACTGCGGCGTGGACACGCAAAAGGTTATTCAAGGCCGTTTCCTG
GGCCGCCGCTTCTACCGGCTCCATCGACTCTCGCTCCAGGTCTACCACCTCCGATTTGAG
TTTCGCAATCTTTTCTTTCAGCTGCGACTCCCGCTCCTTGGTTTGCTGCTTCTTCTTGTT
GGCTCGCTCAATCTCGGCGCGAAGCTTTTCTATTGTTTGCTTATCCGACTGCGTCAGGTC
CTCCGCCGTCTGCGCCTTGGAGATGCACGTGTAAATATCGGTCTGAAGCTCCGTGCACTT
GCGGAGGAGACGATTCTCCGCCTCGTGACTTTTGAGAAAGGAGTGGTGCAGGCCGCTGTA
CTCCTTGGTGAAGTTCTCTAGCACCTCGTCGTTTTCTAAAGTCATGAGCACCTCTTGAAA
CTTTTTCTCATAGTAGTCAAAATTATTTACATCCTCCTTGATGGCCGCAAATTGTTTTTC
ATCTTCTTCCGTGAAGATTTGCTTTATCTTGGCCGCTTCCGGTGTTGGCTCGGCACTCAT
TTTCTACTGTATACTAGATATAATGGTTGGTTGGTTGATACGCCAAACTTCTAAAAACTA
AAGTGAAAAAGGGGGGAAAGAGCGGAAAGTGATGCATTTCATTAAACTACCTTACACAGA
TCACCAAAGAGAATAAACAACGACACACGGGCATGGAGAGGCGTGCTAAAAATTAAAGCC
GCACCGCACTATAATATACACTAAACAGCACACGCTGATTCGCTCAAAAAAAAAAAATAT
ATGTACATGTGTCCACCACTCTTTTTTTACTCCAGTGGCGTACTATTGTGTTTGAGCCAC
TCGCTCACCTTTTCCGCATCCTCTGCCACCCCCGGAGGGAAGTGTGTGGTTTGCAGTAAC
AGGCTCAACTCCGCACACAGTACATCGTCATTCTCCTCCGGAATGAGATGACGCTCGTGT
ACCTCTGCCAGCAGACTCTGTTGGAGCATCATCCGGTGCTCGCCTACTTCATCAATCATA
CTCTGTAGCTCAAACGTTTCACTCGTGAGGGTCGCACACCGCTCCTTCGTCGACTCGTAC
AAGTGGTTCAAGTCTTCTAGCTGTTTGCGCAACTTCATAATGTCATCCTTACTCTTCTTG
GAGGTGGTGTTGAGGTAGGTGGACTCCAACAGCAGCTGCTGCATCCCCCGCTGACACCAC
ATGCGTGCCGCCCGGGCGTGGTAGTTGGCGCGGACGGAGTGGGACTTGACGTCCCGCGTC
CGCAGGGCGGAGGCCCACCACACTAGGTCGCGGTCCCGCTCCACTAGTGTCAGTCCTTCC
GCACAGGCCTTGATCTTCTCCAGCGCCTCCTCCACGTGTACCACCGCACTGCCGACGGTC
TCTTCCGGAGCCAGGCGGGGGACGACGGGGTCCGCGGCGTAGTCTGGGATAGACTGGGTG
TCACAGGCCCCCTCATCCGCCGCCGCCACCCGCGCCCTCGCCACGCGCTGCCGCCAGTCC
GCCTCCGCCTCCTGCGCACTGACGCCTTCCACTGCTGGCAGACCCATCAGCGCCCGCTTC
TCCGCCGCAGATGTGGTGACCCCTAGACTGTTGACATACTGCTTGTGGCTCTCCTCCACC
GCATCGGCGAGCTCGGTGGGCATCTGGTCCCGTCCCTTCCGGCTGAGGCCAGTCCCCAGC
CCGGTGAGGGTGGACGTCACCGAGTCCACAGTGGAGTGCACCTCTGTCATATTCTTCCGC
TGCTCCGTGAACACCGCTGGGGGCCGACGACTGCCGGCCGACAGCACGACCGGTCTGCCG
GTGGCGGTGACGGTGGCCCCTCCGTTATGACGCTCCACACGCTTCGTGGTACCCTTCTTG
GGACTAGAGGTTTTCGGTTCCGTCGTATCATGGCCTCCTACACGACCCACGGCGACATCG
GTGTCCTCATCGTAAATACTCTTTGATTTTGCTAAATCCTCAAACAGTTTGATGAGCTCC
TTTCTACGTTCTAACGCCCGTTTGGCATCCTCCGCTTTTTTTGTTGTTTTTTCTAACGGA
ACCCCTATCGTCTGACTCATAGAGAGAAAGGGAGTTCTAAAACCACTAAAACAAATTGTT
TGGGGGTGTTCGATTATTGCTTTAGCAGGAAACAAAAGTAGAGAGGGAATGGGAATGATA
TTGCTTGTTTAGATTTTTGATGTGCACAAAAGGGAAAAAAAAAAAAAGTTTTACATTCCG
GTTCATTCAACTGTCTGACGGACGGAAAAGAAACAAAAGTGTAAAATGTGAGTAAAAAGA
GCAAAAATACATTTATTATAATATCAACCGTAATAAAAAAAAAAGGGACTTACAACATTA
TTTGTTTATTTGTATAAAAGTTTCGCAAAAAAAAAAATTGTGTTAGTAATAACATGGTAT
GCTTGTTATTCTATTTTGATGTTGGACTCCATCCGCTCCTCTATTTTGTCCTCCAGTAAG
TTAGGGTTTACCCGCATTGAGTCGGGAAGGATCCACCGCGATAGCAGGGCAACGTAGCGC
GTGAATAAATAAAGGATGTGAATCTGCCAGAGACGGCAGTGAAAAATAAAATTACGATAG
GTGGCGATTAGACCTTGTCGAAAACGCTCATTCGCCGTTCGTTCCGCCTTTATTTCCCGT
ATGATTTCTTGTTTTTGTAATCGATCCTCATCGGCGCTACGGTCAAAGACGCTATCGACC
GCCTTCGAAGTGGTAGTGGTGGTGGTACTCTTCTTACTCTTTAGGACTTTTTGACGCTCC
TCGATGCGCTTCAAATACTGTTCCGCGGCCTCATAATCGGAGATGGGGCCCAATCCCTCC
ACCGCCGACTGCACAAACATATTCAATCGATTTATGGGGGAGTCGTACAGACGATTGATG
CCACGTAGAATATCGATTCCTCTTCCTACCAGCGGCAGCTCCCTGGGGATCTTGGCCTCG
TCGAGGAGGAAGGTCTTCATGCGAGCGTGTGCGTTGCGCTGCATGCCACGGACCTCCTCC
AGCGTGATCTCGTCGTAATTGCCTTTCCGCATTGAGTCGATTGGTTTCTGTATTTGCATC
GACGCAAACGACTCGGCGTTACCCAGTCCCCAACCGGAGGCCACTTTTTTCAGCGAATCA
AAGTCATGGGTAAAGATGCTCTTGAAGAGTAGCGCGTACTCCACCCGGAATCGTTCCGTG
ACGGGGGCAGATAGGCCAAAGTCGATAAACACCACTTGAGGATCGTGGTGCCGGCGAGAC
CAGAAACTCCCTTTTTGTTTGGGTGTTTGCTTGGACTCGCCTGAACTAGAGGAGGACTCT
TTTTTATCTTCCGAGGGACGGTGGCGCACGAGCACGTTCGCGGCGTGGGGGTCGCAGTGA
ACAAACCCATTCTTAAATAACATATCCCCAAAGGCATCAAATACAATTTTGAGCACTTTC
TTTTCGCCAAACCTTTCTCTCACTTTTTCCGTTTCTGTCAGCTTTAGCGCATCAATCCAC
TCTAACACTAAAAGTTTCTTGGTGGTGTACTCTTCAAATACTTTTGGGATGTACACGTTG
CGGTTGTGTCTAAAGTCTTCCCGAAACCGCGCTGCGTTGGCTGCCTCAATCGTAAAGTCT
GTCTCCCGTCGTAGTCCGTCCACGATGGTCCGGCGAGACCACGCGGTGGGGAGGCCGAAG
AGGTACTCCACCAACGTGGAGACGAGGGAGTAGGTACGGATATCCCATTCCCCTTGCTTG
GTGATGCACGGCTTACGCACCTTGACGGCCACCTCCGTCCCCTCTCTCAGCCTCGCCCGG
TGCACCTGCGCAATGGAAGCGGCGGCGACTGGGACAGGGTCGAACTCGCTGAATACCTCC
GATAAGGGTCGCTGGGCTTCCTCCTCCACAATCCGCTGGACCACGTCGAACCCTACCGGC
GGGGCGTCGTCGAGCAGTACTTTCAGGGTCTGAGTATATTCCTTGGGTAGCACATGGCTC
AGCGAGTTCAACCCCTGGCCTAGTTTGATGTACAAGCCTTCATTCTTCATGCAAACGTTC
AGTATAATGTTGGCCGCTCGTCGGTGTAGACTAAAGTATTCCTCGGCCGTTTCGGGGGTC
GTGAACTTGTACAAGTAGGCAATTCTGAAAAAGCCGCTGAGTGCCCGGAGCGAGCGGGTC
ATGGAGCGGTCAGTGGAGAGGTCTGCCACGACATAGACACCAGTCAGACCACCTCCAGTC
CACATGGCACGCCGTGCCCACTTCATTACACGTGGGGAAGGCATTTCTGTAAAGATTTAT
ATAATATTTGTTTAGGGGGTTTGTATATAGTACAGTTTTCGTTACGTTAAAAAAGCAAAA
AATGAAAAAACTGGACGAGAGAGAAAGCGGTACGCAAAACAGAAACAGAGAAGATAACAG
AATAGCATTCATCGAAAAAAAGAAGACGAACCATGTCAATCCCTCTTTATGTCGTCTATA
TTAATTAATCGCCAATAATGTACTTTTCATTAATACTAAGAGAGTGTGCGCACCGCATCC
ATTCATCTACAAGTAATCAATCATGAACATCAACCGCATCAGCGACAGGGAGCAGCTCTG
CAGACCAACGTAGCTGCGCCAAGCAGAGATGGCGTCGGGTTGACTAATGTTAAACGCAGC
GTTGCGCGGGGCCTCACCCACTCCGCTGTCCGCCCCCTCGCTCGGTCCATACTGCTCTAG
CCGCCCCCCTTGGGCCGACAGCCGCTCCTCCGCCCGCAGTAGCGTACGCGCAACGTGATT
GCGCACGGACGGGAGGAGCGTCTCGGTAAGGGAGCAGGTCCACAGGAAGGAACTGTTCTT
GGGGGGTCGCTCGGCCACATTACCGTTGCGGGGTACCTCCTGGAGCAGGGTGTAGCCGTC
CTTCATCATGGCATGCAGCACCTCGCGTGTCTTCTGTGGGGTCGCGATCACCTCCTCGGC
GAGCACCTTGTCGTCCACGTAGTGGTGCTGCAGCAGTAGCTTGATAAGCCGTACCCCGAC
CGTCCCGTGTCGGACAAAGAGGACTCGCTCAATCACATCAGACTGCAGGAAGTCCACCGC
CGCACGGGTCTGCAGGCGGTACGAGTCGTCGTGGCGGGTCAGAATGGCGGGAGAGGTGCA
CAGCCAGTCGAGGAGGAGCACGACGTCCTCCTTCTTCCCTTCCGGGTATAGCTGATGCAG
TCGGGCGATCAAGTGGGTAAGGCTAATGGACTCGCTCATCGGTGGGAAGAAGGTGGGATA
GCCTCCCTCTACATCTGCCGCCACCGTCTCCAGTTCATCCTCGGTCGACGTCGCGGGAAA
GGTGTCAAAAAACATATCCAATAGGGCCGCTAACACTTTATGATTGACATCGGAAAAGTA
ATTTGCTAATTGGTTCTGCAGGGCCACCTGTAGCAGACCTTTTACTATTCTAGGGATAGA
GAGACGGCAGGGGTCGGCCGAGAGCGTCTCGACGGATGCCGCCTCCTCCGTGTCCTGTCG
CCCGCGCTTTCTCCTAGTTGGTTTTTCCTCACTGCTTCCGCCACCCACAAACTCTAACCA
CCCGTCCGCCTCCATGCGTGACGCGGTCAGCAGCACCTCTTCTGCGGCGGCGGGTTGACG
CTCCTGGGCTAGCCGCACCGCCGACTGCCATGGCACTACGCCCAGCTGGAAGAGTACCGC
ATACAGCGCTACCCCCGCCGTCCCATAGCGGTGCTCCACGTGCCCCGCGATAATAGGGGA
CAGCACCCGCAGCAGTACAGCATCCCCCACAGACAGTCGATACTGCTTACTAGAGGGGCT
GTACCGCACCACACGGTGGAGGACGAGCAGGCCGACCACCTCCTTGACCGCGGCGTCACG
AAGCAGCGAGGGGTCTAGGGTCATCTCGCTCTTACCGCCCGTCTGCTGTGGTAGGTGCAG
CGCGCTGGGGACCGCCCTGGCGGTGGAGAGGGACGTACCGCTGGTGTGCTCCTGTAGGAC
TGCGTCCGCTATCTGCCGCAGTGTGAGGGCACCACGGCCGGAGAGCGCCGCCACCGCGCT
GCCTGCTAGGGGGCCGAATTGCTTTCCAACGGTGTATTCTAATAACTTGTAATGATCGGT
GAGGATCCGACGCTGCACGGTAGGGGCAGACGTCATTTGGGCTCTGTTACTAATGAATGA
TGGTGATTATTATTACTATTATGTAGGGTTTTACTTCAAGGAAGAAAATAGGGAGAAAGA
AGGGTTCATACGAAACCAGGATAATGAAGAAAAAAAAAATATCAGACAGGAAGAGACTTT
TTTTGCGAAATGTTCAACAAACGAAAAAGGTTATATTCTTTCATTACTTCTTTAATTTTT
TACCTGAAAGTATGTGACGTTTTTTTTTTTTTTTTCATTGTTATTATTCTTTAATCTAGT
CTCATTCGAAAAAACACAAAAAGATAAAATAAAAAGAAGGAGAAGAAAATAAACGCTTTC
ATATTTATAAATGTATTTATTTTTTTTTCCTTTCGTGTACTTTTTTCATTTTTATTATTA
GTTACGAAATTACTTCACGTCTATGCACTCTTTCTGTATGTTTTGTTATACGTATCCTCT
TTTCCTTTTAGTGCTTCTTCTCGCCTCCCTTGACAGGGTTCATCAGCTTGACAAAGTATT
CGGTCATCGTGTAGGCAAAGATCAGCTTCGGGGCGGAGGCTACAATCTTTGGCGTGAGGC
CCTTGAAGAAGGAGGTGACCCCCTCCTCCCGGAGCATCGCGGTGGCGGTGAAGATAGCAT
TCTTGCGCTCCCCCTCCGTCGCCTGCTGCACACGGGTCTTGACGACATCCATCGGGTTGG
AAATGGCAATCGAGCAGCACGCACCAATGGTGGCGGCGCAGGTGTTCTGGAAGAAGGTGG
CGCTGCGGTAATCCTGGAGGCCAAAGATGTAGTTCTTGGTGAAGGCGGTACCACCGAAGA
GGCAGAAGGAGCCGGGGGCGTTACGGCACATGGTCACCAGCGTACCCGCGTACATGCCGG
TGATACCCTCGGAGCGGAGGAGGTGGAAGAGTCCCTTGCTCATCGCCGCCTCGTTGGTCT
GGCTAAGCACTTTCAGACGGTCGAGGGGCAGCAGAAACACCTCACCGAGGCCGATGAGGC
AACCAGCGGTGGCGTCGATCAGCACCTTATCCGCAGACCCGAAGGCGGAGGTAAAGCTGG
AGCGGTGGTTGGTGTTGAGGTAATCACGGACGAGGGGCTGACCCGCAAACTTGTAGACAC
GCTGGAACACCTTGTAGACCACGGCGTAGAGGGAGCCGGGGTAGAGGTAGATGACCTTGC
GGAGGAAGCTGTCCTTGGCGTGCTTCTTGAAGATGATCTGGTTGAGGTTCGCGGCGGTCT
CCCCGACGGAGCCACGCACGATGGAGCCCTTGTTGGACATGAGGCGCTTCGCCGTGGTGT
CGAAGGGGTGAAAGAAGGCAATCTCGAGCACACCAGCGCAGGTGGCAGCCCCGGCGTGAC
CGCGGGCGAAACGCTCAAAAAAGCTCTTGTCGTTCTTTGTGGTGGCAGCCATTTTTTTAT
TCGGAACGGTTGTTTTAAAGGAGCGAGGGACTTTACTAAAAACGGAAATAAAGATGATGA
AAGAAAGAAAGAATATAAGGTGATTGGAATTCAACCGTGTTAAGTGTTTATCTCAACAGT
TCTGTATGACGGTGTACAAATTTTTAATTATTTTATGAAAAGATTTATTTATTCGTTATT
CGTATTAAAAATGTTGATTAGGTTTTATCATTATTAAGAGTGATTTGTTTGTTTTTTAAC
TATCCTCGGAAGGAAGACCAGAGATGCTCTTCTTCTTCTTGGACTTTGCCTTATCCATAA
TAGAGTCTACTGTATTCATAATGTGCTGCTGCGACTGTAGCTGTCCCATCACCTGACGGT
AACGCTTCTCCCGTATCTCGTCGGTCGCCGCGGACTCCTTCTCCCGCGCCCGTCGCTGCA
CCGTCGCCTCCGCCGTGAGGTGTCGCATCACCCGCTTCTTGTCCTCCCGCACCGTCCGCT
TCAGTAACTTGATCTCATTGCGCACGGCACTCTCCGGCCGCTCATTCAACAGTGGCTCAA
ACTGACGTAAGGGACGTGGGCGGAAGGAGCGCATCGCGAGGGGGGTTCTAAACTTCTCTA
CCGCACTCACCTCCGCGGAGACGGTGCGCTGGAGTTGCACATGTGCCTGTCGTACTGCCT
CTGACGGGGACCAACCTGCCTCCTGTAAGAGGGCGTCTAACGAGGCGAGCGGCTCCGCAA
AAACAGAAGGGAAGGCGGCGATGGAGCTGTACGTCTCGGCGAGCACCGTCAGCAGCCGGT
AGGCAGCGAGCAATAGTCCTTCCTCGGAGGGAGACGTGGACAGCAGGTCGACCGCACTCC
CAGCGGTGGTTCCCTTACCGGAGGTGCGCAGCAAGTCCTTCTCACATCGGTCGGCTAGAG
GGAACGGCACTCGCACGCCTTGGTACCGCGCTGGTTCGAGCACCGAACGGGGCAGCTGCA
GCGCTAGAATGTTAAACGGTGCCACCACCACCTCCGCCGCGAACCGCCCCTGACCGCTCA
CGAGAGACTGGGCCAGCAGCGAGGCCAGCACCAAGTAGCAGTGCGCGGACTCCAGGGACT
CTATCTTCATTTGGGCAATCGTGGAGGAAAGAAAGATGTAAAAGGGCGTCATCACCTCAT
GACGGTAGTCGGAAGTGGGGAACACTTTCGAGATGACATAAAGATACAGCAACAGAGGGC
GGTCGAGCGCCTTGCGGTTACTCCGTAAGAATTGTTTTTCCGCCTCGATGAGGACCGCTC
TAAAGGTGTTGCTGACGTCCAGAAGGTGCTGCTGTGCGTAGACGTAAATTTGCAATACTA
TTTTGTGAATATCGGACGAACGTCTCTTCCGTGACGCCGCGTCGTCGTCTTCGATGGTGG
TCTTGGCAATCTTCTCCAGCTGCGCCAATAGATTGTCTAGCACCGCCGTGCCCGTCACCG
CCTCCGCGCCTGGCAGACTGCCCTCCTCCTCGTCGGCCTTCTCGTCCTCCATCTCGTCGT
CGTCCTCGCTCTCGCCCTCGTAGGAGGAAGGGATATCGACATTGTCGTCCGCCATGTCCT
CGTCATCCATGTGATAGGCATCGTCGCCCCCTCGCTGGACCCACTCTCCCTTACTCCTTT
GGATCATGTCCCGCCCTCGCAGGCCGAGGTCCGGCAGCTCCTGTCGGTCCGCCTCCAGTA
CCGCCTGTTGTGCCTCCTGCAGGAGTATCTCCTCCTCCGAGAGCAGTCGGTCCGTGGCGT
GGGCACGGCGGGGGTCTACTCGCATGCTGTTCATGAGATTATCGAAATCGTCCTCCTCCT
CCGCCTCGGTCTCCTTTTCTGTCATTTCTTTTTCTTCCGCGGAGACGATGGTGCCACTGC
GAACTAAGTTGAGCAGCTCTTGCTGGCTGGGGTCGAGGAAGGATATTTTCTTTTTCGATG
TCTTGGTCGCCTCGGATGGTGTGTCATTCACGGTGACGGTCGACTTCCCAGACGAGCGAA
TCGTTAATATCTTCGCAGTGGGATTCTTCTTGCGGTGATCCCGCAGCAGGGCACGGACCT
CTGGGGTGTTGGACTTCAGAAAAGCTTGACGCTCTTCCTGGTCCTTATCGCGGGTGGGCA
GCAGGTGCCGCAAGGTCTTGAACTCCTCATCCAGCTCCAGCGTCTGTTCCTCTCGCACCT
CGCGCTCCCGCTGATCCGCGGCACGCTGCGAGCGGCTGTTGTGGATGACCTCGCGGAAGC
GGTCTTGCTTCGTCATCTTCGTCGGCGCCCCCTCCTCCTCGGTGTTGTACTCGTTCTCAT
CTCGGGGACGACGGAGGGCCCCCAGCAGACCACCCCCAATACCAGCCTCTCCACCGGCAA
GAGGAGTGCGCTCCTCCAGCTGGAACTTGCTCGACCGTCTGGCCGACCGCGACGCGCCGG
ACGGGGCACCGCTGGATATACCAAAGACACCAGACCGTGTGGACATGGGCTTTGCCGCCT
TCGGTGTCCGTGCGGTACTGACAGGTGCCTCACTACTAAATAGAAAATCAGTGCTCCCCT
TCTCTGCCGTCGAGTTTGACCTATCTGGCTGCATAAACCGCTTTACCTGTGATTCCTCCT
GACGTAGCTCAAAGTGGCTCTGACGTTGGGTGAACCGATTGCCGCTCTCCTTTGCTTGAT
TGGCCACATTCTTGCGTTGTGTTCGTTGTGCTAACTTGCTGTTGAAAACAGCGCGTGAGG
GTGGCATTGAAGGTATGCGTCAGCTGATATGTTTCGCTTTCTGGTTAGAAAATAGGGAAA
GAGAAATGTAGATAAAAGAATGTTCACATAAGCGTTCCTGGTTACCTTCGTGCAGATAGG
AAAGTAGAACTACAACAACAAGTGTGAATTCGCAACAGGTAACTTGTGGATTGGTCACGT
ATATTAGTATTGTGAAAATTGTTCCCGATTCAGTTTTTCATGTAGTGTTTTATTATATAT
GGTTTTTGTTTGTTTAATTTTATTTTTTGTGTTTTACTAATAGAAGTACAACTGTTTTTT
TTTTTCAAAAATAACTAATTTCCTAAAGAATTGGCGCTATATGTCTCCACCATTTTCGAG
GTACAGGTTTTTAACTGTTTCACTAATCCAGCGCAATTCAGCACATCGGTCGTGATGACC
GGTTTTTCCAAGTCCACCGTACTGTGTACCTGATTACTAACGCCACTCATCAGCTCCTTC
TCCCGCTGCCGCATAATCTCGTGTTTCTTCTGCAGTGCCTTTTCATTTTCTTTCTCGTAG
CACCGCAGCACGCGAGTCACCTCCTTCTCACACTTGAGGTCCTGGGAGGGGATGAGGTAG
CGGTAGCGGGTGTCCTCGATCCCTTTGTAGCAGCTGGTGGATGCGAGCCTCGGACTGGCG
CAGCATGTCCCGCTCCTCCTTTACCTTTGGGGTGAGGGTCTGCACCTCCGACTCCTTCAT
AATCTCCATCCGTACAGGTGGTAGTCCAGACTTCTTCTTGATCACCTTGCGTGGTTCCAC
CTCGGGCTCCACCTCCTCTATTGGGGCGGGGGCGGCCTCGGGACGCCGTACGGCAGGGAA
AGGCTCCGGTGCACCGTGGCGCTCCGACCACTGCAGGGCACCCACCTGCTGACCCCCTGT
AAACCACGTCCATGGCTTGTACCACACCTTGGGGTGCCGCAGCGCATCCTCGTTCGATCG
GTTGATGAGCAGCAGGTCGGGTGGGCTCCGCATGGATGGGGTGCCAAAGACCTTTTCTGC
GCTGGCAATATTATTTTGAACTATAAAAGCTCCTAACTTTTTCTGTCGCTCCACTTCCTC
GGAGGAGAGCCCGTTCGTCTGGTTCAGGTCGGTCTGAATGTGAATTTCTTCCTTCGGTGG
GACGCCACCGCCGGCTGCCGGCGGCTCCTTTGACAGGCTGGGCATTGGATGTACTAAATA
ATAACTATGGAAAAGAGAGAGAAAAACATTTCAGACGTTTTTATAGATTTTTCACTCCAT
AAAAAGCCAACCGTAATACATTCATTTGACTTTTGTTATTGAAAGCAACTAGTTCTGTTC
TGTCATACCGATACGGTACACCCGTTTACGAGGAACTCCTCCAGCAGCCACTCGTCCAGA
TGGGTCGCAGCGGGGGATCCTCGCAGGGAGACCGTACGTAGCGAGGAGCAATAGAGCAGC
CCCTCCACACTCTCCAGGAATGCACAGTAGGTGAGGTCCAACTCTTGAATGCAGGCGGCG
CCAGTCTCATTGCACGCCAGACCGTACCGTTTCACAAACGTGTCCTCCACCCTTGTTCTG
CTCAAATCTACATAGAGTAGGGAAGAAACATACGCAAGCACGGTGAAGTCGGTGATGTAG
GTGCACAGAGCCAAGTGTAAGTTCTGCAGTTTTAAACCTTTGGTGAATGGAGCACCGTCC
GCTATCTGTCCCTCCTCCTCGATGGTGTTCGACTGGGCATGGTTCCACGCCATTGGTCTG
TCCCTGTTGCACTGGAGGTCCACGCAGCTTAGCAGCACCTGCACGTACTCGGTGAGGGAG
GCACTATCCACGGAGGTGCGACCCAAGTCGAGCGTGACCAGCTCCGTCAGCAGCCCAAGC
GGCGCAATGTAGCGTACGGCGGTGCAGTCGTACAGGTTCAGATAGGTGGTGCACCGCCAC
TGCCGTCCCACCGTGAGCGAGGACGCGCTGAACAGCAGGGACGCCAGCTCCATCCGGCGC
TCCTCCACGGTCTCCATCAGACACGACGTTCGCTTCGACAGTGGTCGGAGGAGTTGACAC
GGGAGGTCCACAAAAACAGCGAACGACGTGTCAAATATAAAGTTGGAGGAGAGGGACAGT
TCCTTTAGGGTGCGTACCTTGCCCAGGCAACCCACCGACCGGAGCGACGAACAGAGCTGT
AGAGAGATGGTAGAAAGACCCACTGCCTCCGACCCCGGTGCATTGCTAGGCCGATAAACC
AAGTTCCCCTCCTCGTTCAAGTGGAAGCGACACCACTCCTCCGAGAATCTGGCCAAGGCG
GCATCGGTAATGCTTGTTTTATTCGCGAGAAGCGTGTGAAGGAATGGAATGCGTGCCAAA
GGGGTGATGTCCCTTACTTGTCCACAGCCGGATATATCAATCGATCGCAATGTATGATTA
TTGTCTAGTCCTTTTAGGCCATTCTCTGTGATGGCGCTGCCCCGCAGTGACAGGTGCGTC
AGATGATGGGCGCTACCCAGCACACCGACACGCCTTAGGAAAGAACTAAACGGTGCTCGT
ATCGTTTCCACATTGCAGCAGTGTTCCGCCAAGAAGGCGAGTGAGGCACCGTCTAACACG
GACTGTTCTAATATCAGCGTCTTTAGTTGTCCTTGTGGGGCGTAACCCTCCATAGTCAAG
CGTGCAGGCCACCACGCCGGTATGAGGCGGGCGGAAGCCTCACCGTTCGAGGGATGAGAC
TGCGACAGATTTAACGTTTGTAGGGACCTCAATGCCCACACGGCGTCTACATTTCGCAGC
ATGGCGCAGGCGGAAAGGTTCAGCTCGGTCAAGTAGGGAAGGGCAAACAGCGCGTAGAGA
CTGTCCGACGTGATATGGGTTTTACACAGCTCCAACTGTCGCAGCGCGGTGAGGCCAGAC
AGCCAAGAGAGATCGGTGACCCTCGCGCACCCCAGCAACTTCAGTACCTGGAGCGTGGGG
CTACGGAGGCAGCTCAGGGAGGCGCTGTCGACGGTGGTCCCCGAAAGGTCCAGCCGGTAA
AGATGGGGGAGAAACGACAAATACGAAAGGAATGTGTGATCCAGCAGCACCCTCATCAGC
GTCAGTTCTTCTAGTGAGGACCAAGACGGTTCTGTCCCAGATAAGCAATCCCCCAAGGGG
GAGACGGGGTAGGTAAAAAAGGAAAGATTGCACCGTTTCAGTCGTGGGAGTCGACTCAGT
GCGATCCCAATTTCGGCCGCGCTTCCCTTGTAAAACGGCAAATCCAAGTGCTCTACGAAC
TGCCCCGCAAAACTGTCCCCCAAGGCACCAATGATGCCATCTCCCGTGGAGGCGGAGTGT
AGACCGGTGATGGGGAGGCGCAGGGTCGGTAGCTGGCTCGTGAAGCTGAGTGTCGTCCCG
ATCCACCGGCAGAGGTAGAGTGCAGTGAGAGAGTCCCCCCAGGTCCGCTCCAGCCAGGTC
AGCACGGGACTCGTCGCCCCCGACACGTGGACAATAAAAGGGAGAGGCCGCTGTGTTTGA
CGGGCGGTCCACCAGCCAATCGGGGGAGGGCGCACGGCGAGTGCCCCTCCGCCTCTCTCC
AGCGTCTCCTCGTACAGAAGTGCCTCCTCCCAGTCCTCGAACAGAGGTTCCTCCGCCGGC
TCCACTGTGCCCGCCGTGGTGGGGAGTGGCGTTGCTTTCTTTCGCAAAGAGCTCTCGTCC
AGTACCAGCATGCACCGCACAAGGCACTCCTCCCTGGGGCTGTACGTGAGGAAGGTGACG
GTGTTGCCCAGTCGCACCCCGATCGGCTCCTCCGCCCAGCAGTTCAGCTTGTCATACCCC
TTACAGAGGTAGTTCGGATCGGAAAGGGGGTTCACCTCCACAGGTGGTGGGTTGTCCTCG
TCGGGGGTAGCTTTTCTTCCCACAATAGGGCGTGTCGTGCACATCTCTGCCGCCTCTCGC
AAGATGGGATGGGCGCTGATGACCGCAAAGGGTGCACGACTACCGGAAAACTTTAAGACA
TTCACCGCGTAGGACAGTTGGAATAAATTTTGACGTGTCGCCCCTTCAGGGAAAGACATT
CCAAAAAAGGGGAATAGGCTAAAACGGATAAAAATACAACGGTCAGTGATTAAAAAGTCT
GTATTCCCTTTCGAATTGTGGATTGGTTGCTTGAAAGAAAAAAAAAAAAGGAAAGGCAAG
TACGAATGTGAGCACAAAGAGTATTTGGTAAACCATAACGGAGAGAATAAAAAATAAACA
AAAACGGTGAAAACAAAAAATTGATGTGGAGGCAATATGCATTTTTTTCGTTTTTTGGCT
TTTATCTTCGCAACGCTCCATCAGGAGATTTACTCTTCACGATATATTTTTTCGAAGTCC
ACGATGAAATCGTAAATGGACCTCTATGATTCATTTTTGAAGTCGCAATCGCTAAATCAG
GGCCCAGTCCCATCGGCTGCCCACTGGACAGTCTGGTGGAGGCATTCACCAACACCACCG
CGCTGTCCACCGTCGTGCAGTACGTGTTGATGGCCTCCTCATCGGTGGCCACAATCCCAT
CGTTCTGCTTCGACCCAAATAGATCTAAAAAGAGGAGCACCTGCTCCAGAGAGTCCATCG
TCTTAATGCACAGGGTGTGCGAGATATCGGAGAGGGAAGTGGCCCGGTAGTCCTCGTCAC
TCGCGAGGGCGCTCACCCAGTCCCCAGCCCGCTCAATCGAGACCTGATCCCCTAGCAGCC
GCATCCCCCGCTCCCGCAGCTCCCGCATCAGCTCCGCGTACCGTGGGAAGCCGGCGTGGA
CGAGGAGCAGGGTCACCGCATTGGCTGCGCCCTCTCGCTGATACTTGGAGTTAACAATCA
CTCGCATGGCCGTCTCGAACGACGCGCTGCGGTCAATGTAGAGGGTGGTCACCTGGCTCG
TGGCGCGGATCAGGGGGATGCAGGACCGCTGGCTGGCGAACTCGTACAGCTTGGGAGGAC
CGCAGACAATCGCCACATCCACTCGGTCTCTCACCTGCAGCCACTCGATCGTCTTGCGGG
GATTCACGTCTGCGTTCTCAATGTGGACGACGGAGGCGGCGGGCAGACCAGCCCGGTTGA
GCGCCACCTGGGCACAGGAGACGAAGGCACGGTTCACCCGCTGCACCGCCGCCCCGCCAT
CCACCAGCACCGCGTTACCCGCTAATATACCCATCGTGATGGCGTCGATGGCCATGCGGG
CACGGTAGCGGGAGAGAACCCCGACGAACCCCAGCGGGACCGCCACCTCGCACACCGTCA
TCTGAGGATCACAGTCCTTGAGGGTCGCATTCTCCTCCATCCAGGTGGCGGAGCCCAGTG
GGTCGGGGCAGGAGATGAGATGCCGCACCTCACTGAGCAGCTTGTCAATGCGTAACTTGG
GCATCTTGTGCTGGTTGTAGCTGTCGGGGACTGGCCGTGGGGTCATCCTGGTGGGGGTCG
CATCATCGTCGTCCTCTTCCTCCTCCTCCTCTTCTTCCCCCTCTTTTTTTCCGTTGGTGG
AATGGCCCTCCTCTTTTTTCGCCACCGGGCGGATGCCTTCCTCGACGGCACGGGAGGGAA
ACATCGCGGTGGCGCAGTCCAGCCGGTTGGCATGGAGGATATCCTCCTCATTTTTTGCAA
TTTCGCTCAATATCGTTTTCAAAAATAAGTGTCGTTGTTCTAATGGGGAAGCCGCTAGTA
CGGATTTGGCTTCGACGGCCGCCTGCAGCTCATTCAGTACGGCGGAAAACAAGAAACGGC
AACGACGCATGTGTACCTTTTTTTTTATTATTATTTGTTTGTTGGGTTGAGTATCCCAGT
GTGTATATGCTTTCACTGAAAAAAGCTGGCTACTGTGTTCAAGTGAGAAACGGAAGAAAA
GAATGAAATTATTCAAAAGACGAACAGAGCATCTCCATCAGGCGAAAAAACGACTACATG
CAACAACAAAAAAATAAAAAAAAGATTTTATTATTTACCCGCATGATGCGACTTGAAAAC
AATCATGACCAATTATACGGTGCAACTTTTAAAATTAATTAATACTGTTTATTATGAAAA
AAGAAAAAAAAATGGGCTCAATCATTTTTCTTTTCGACACGGGTCTTCTCTCCCTCTTCC
TTCGCCTGCACAACGGCTGTTTCCAAGTACGCCTTTCTCGCGTCCTGAAGCGCAAACACC
TGCGTGAATCCTCCCAGCGCCGTCCCCAACAGATAGAGCGCCATCACCGGAAGGGTGGCC
TTGCACGACCGGCAAATACGATAGGCAATACCCATTTCAAAGCAGTGAATCAAAAAGGCG
AGTATCAGTACCACCATCATGTTGTCGCGGCTCCGGAAAATGAAAAGACCGAGGGTAAAA
AAGTGGTCGGCGATCTCGCGTTCGAAAAAACTGCACACCTCGTAGCCCAGCTCCACCAAA
CTCCTGGAAGTGGAGTCCACCGGCAGGGTAGGGATCACGGCCTCCATACGGAGCAGATAG
GGGGGCACGCGGAGGTGCTTGCCGTCCTTACCGGGCACGGAGACCAGCATAATGTAGATG
AACAGGAGGAAAAAGAACACGGTGGGGTAGAAGACCTGGTGGGGCGCATTATACGCCAGT
CTCTTCTCAGGTTGGGTCGTCATGGATTAGAGGAAAAAGAAAAAAAAATGTGACAGCTTA
TGATAGAAGAAAAGGGTTGTATGAGAAGGGATAGAAGGAATAGATTTAGAGTAGAACCCA
ATCACAAGGAGGGGAATGTTCTTTTCAAATAAAAACGTGCACTTCTGTATTTTGGTTACG
ATTATAATTAAACGAGGTGTTAAATTCATGTTAAAACAGAAAAGGTTACTCTGTCTTGGT
CACCTCCCAGAGATCAATCTTCTTTTCGTAAAACGAGCAGGAAGCGACGAGCAGGCGGTT
TCCTCCGTCCGATTGGAGGACCGTCATGTCATACACTAGACACTCCTCTGAGAGCAACGG
CAGGTCGCCGTTGGGCTCCTCGGCACAGAAGTAGGTGCAGGCGTCAAAGACAGAGGACTC
CTCCCCCTTCACGTTGTACGGCAAGATCGCCGGACCACGCTGCATGAGAGGCAGTATCAG
CCACCCCTCTGTGCCCACGGTCGAGGGAGGGACTTCCTCCTTCCCTACCGCCGTGCGGCA
GCGCCAGGCACCCCCACCGAGGGCAGCGGTCTGCGCCACCGGCCGCCGCGGGGCCCGCCG
ATCCACCAGAGAGACGGTCTCGTCGTACGATCCTACCAGTTGATAAGGCGTACTAGTACC
ACCCTCCATCACAGGGGCAATGGAGGTGACCCCGGCGGAGAAGCGTATCTTGCCGGTGGC
CGTCCCAGACCGCGTGTCGTAGTACTTCACCAGGCCATCATCCCCACCACTGCAGACGAT
CCCCTCATCCCCTGTGACGGCGCTACACCAGGCGTCGAACTCGTGCCCCTCCAGTGTACT
AGTGACCGCCGCTCGCTCCGTGTTATACAGTACGACCCCACCAGTGTGGGCGGTACACAG
CAGTGTGGTGGCATCTATCGGGGTAGCGCTCGTGAGCATCTCTGTATGGATAGAACGGTA
TACCTGGCGCTCCTCCAGGGTGTCAGGGTCTAGCAGCCGTACACTACCGTCTGTGCAGCA
GCACATCAATGTCGAGGGGTCATACCAGGTGAGATCAAACACACCGGGGAAGGACTCTGG
AGTACGATGTAACCCTTCCTTTTCAGTAGAGGCAATGCGATCGCTAGAGACCAAGCCAGT
ATAGCCGGCCGCCCCACCTTCCTCCTGCGGCGGCTGATGGAGATAGCAGGCGCTATAGAG
TAGGGGATGTTCCGCCGACGTCGTGGGTCGCGCTAACAGACAGTTACAGGGAAGTGCTGT
ACTGTGTGAGGCTACATGGGTGACGTGCATTTTATTAGTTTTGCTTCCAATAGAGGAGAA
CTGTGTACTTGGTTTATGAAAATAAAACAAAAATGGGAGTGAAAAGGTAGTTGACTACAA
TGAAAACACATACACCACAAAAAACGAAACATGTTTCAAACCTCTGAGATCCCACAGCTT
TTATCATTGAATCAATCTATATGAATAAAAATCATAGTAAAAAGAAAAACTTAATCTAAA
CTTCAAAAAGAAACAAACAAACAAACACAACGGAATTACTAGGCTCATCTAAACAAAAAC
GATAACATCTTTTCCTTTCATTCCCTGCTTCTAACATGGTTGTTCTGCTTCACCTTAACT
CTATTATTCCACTCCTCAATAAAACGAAGAGGGCTTTTTACTGCTGGTTGGTGGCATCGC
CCAACAAAGTACGCTTGCGCGACTGCTTGTTAGCGCCGTAGGAGTAGGCGCGCATCTGGT
CTAGGGTGTTCCCCTGCAGTGGGAGGCCATCCTCCCCCGTCAAGTTCTGTGAGGTGGCAC
GGGAGGTAGGGGCGGTGCGGACACAGGAGCGGGTGGGAACCCCACCGGCGACGTGACTAG
TAACAAAGTTCGCCTGTGCCTTGTTGGACGGGGAAGGCGGACGGCTGCTGCGTATAATGC
TACGCGCCTTCTCCTTCATATCGGTGACCCGTGTGGAGCGGTCGTGGGCGAGGGCCTTCT
CCGCCTCCGCCAGCTGTGACTCCAGCTCGGCCAGCTCCGCTTGCTGCTTCTTGCGCTGCT
GCTTCTCCTGCTGCTGCAGTTGGTTCAGCTTGGTCCGCAGGGCGTGCTCCTCCTCCGCCC
AGGCAAGGGACTCCCGCTGGAGTCGGGCATCCATGTCCTCTCGCTCCGCCAGCTCCTGCT
CGGCGTCCTTGATCTCGTGGACCAGAAAGTGCATCCCCTCGTACTCGTCTAGCGTGCGCA
CATACACCTCCTCCACCTGCTCCTTCTCCTTGAGGGTGCGGTCGCACGTCTCGGCCAGCA
CCTTCGCCTTGTGCTCTACGTCCTCCAGCTCTTTTAACAGTTCCTGCTTTTCCTTGGTGA
CACGAGAATCCGACACTTTAATTTTCTGTTTAATGGCTTTCCGCTCCTTCTGGACGGACT
CGATTTCTTCGTCAATGACGTTTAATTCAGTCTCCGCCTCCACCACGCGATCACGCCACT
GTTTGAGTAAATCTTCGGACATTGGGGATATAAAAATTTAATGATAGCAAATGCAGTAGT
CACGGGGTGCTCTGTAAAGCTAAAAAATGAATCTATGAAACTTGAAAAGAAAACTCTGTG
AAATGGGAGAAAAGAAGTTGTCACGTTAATGAAAGAAAAGAAACGTTCACACTTGGGGCA
ATCACACAAAACGAAAAACAATGAAAAAAAAATGTCACGAAACAAACTCGGAAAAGTACT
GCTCCGCGCTCGCCTCCGCCCAGCCTGTCATTTCCCTGCTGACCCTCCCGCTGTCCTTCG
TCAGACGTTGTACGAATAGCACGATACTGTCCACCAGAGACTGCCGCCCGTAGTGCGTCA
CATGCTCACTCAAGATGAGAAACGACACATGATAGTCCGCGACCGGGACGGCCCGCTGGA
TCGGCAGCAGTGGGCTCTCCTGTAATAACCGTATATAGCGGTGGACGGTGTAGCTGCCCA
GTGTGAGGTGCAGGTCCCGTCCGTCGTGTGCGGTGGCCACATGCGCTAACAACTTGAAGG
AGCAGCGCAGACTGTTGGGGGTCCGCTCTATCGCACACTGTAGCTTATCCTTCTCGGAGT
GGATGAGGTGACAGTGATAGCCCTCCGTCTCGCTGGGGGAGGGGGCCTCGTAACGCTCCA
CCTGTGGGATCTCAAAGGGCCCTAGGCAGTCTAACGTCGGTTGCAGACACAAGCCCCGCA
GCAGTTCCGTCTGAAGAGCGGAGTAGAAGTCCTCCACAGGAGTAGGGGAACATGTCATTT
CGTGATTTGGGAAAACAATTAGTAGTTAATATTACTGTTGTAATAAAAAGGTGGAAAGCT
TCTGTCACTGTAAAAAAAAAAAAAGAGGGAGGAAATGTTAAGCATAAATGCGATCTACCG
GACAAAACCAAAAACATTCTATTTAACGTTTAACAGCATCAATACAGTTTATTTTGTTTT
TGTTTTTTTGACTTTACATGTTCCACTTTTTTCTATGCGTATTAAAGAAAAATGTACAAA
AATAAAATTTACATGTGCTGGTATAATCATCATAAAGGAACCGTTCTTTTCCCCTACTTG
CCATATTTCCGCTGTCGGTACTCCTCTAACAGTTTATTCTGATAGGCCGAGGCGGCGGCG
CTGGAATACTCATAGGGTCTTTTCTTCAGATCACTCAGCCGACGTTGGGAGCCAGGTCCG
GTACTAGTATTGACCTCCTGATCGAGTGACACCGTGCGTCTCTCCTCCTTCTCATGAAGA
ACGGAGGTCTGCGGTGTGGTGGTTTGTCGCTTCTGCTTCCCTGCGTTACCGTCCCATTGC
TGTTGGGAGAGCATTTTTAGAAACATGTCTGGTGCCGCCTTGGTGGGCGGGGGAGATACC
TTTTCCTCCTCCCGTGCCGTACTACGGGGTGGAGAGCTCCTCGTCGTGTTTTCCTCGGAG
TAGGTCTGCTGACGCATCGCCACGGGGGTATGTTCCGAGACGTCTCCCGCCGTGTAGGAA
TCAGGGAAGGTGGAAGTATCAGTCCCGCTGATGCCCTTCTTACGGCGGTACTCCTCCAGC
TGGTGCAGTCGGTAGGACTCTCCCGAGGGTGGCGGAGGGACAGAACGGTTAGGCGGGGTG
GTCTCTCTCTCACTGGGGTGAGGGGCACTCGCGCTCTCCTCCGTGTAGTGACGGTTGGCC
TCCTGAGAGAAGGTGGAGTACCCAGCCGGTGGTATATTACTATTATTATGGTTATGGACC
CCATTGTAGGTGTGGTACGCCGCCCCTCGTGGGCTGGGCTCACTCTCGTGGGAAATGTGA
CTAATGTTGTTGCTATTGAACTGACGGTGGGCACGGCTGTCGTCCTCTGGTATGGGCTCT
ATTCGGTCCTCCCCTTGAGGACCACTGTCGTTGAGCCCAGACGGTCGTACGGCGTCATTG
CTATAGTCTCTCTGACCATTCTCCTCCCTGTTCCGTCTGCTCGTCTGTCGCACCCGCTCC
AAGGCAGTGGCCCTCGCCGCCTCCCGACTTTCCTCCAGCGACTGCTGCAGGCTGCGGTTA
CGGGGCTCCAGCTGCAGCGCCATCTCGTAACTCTCCGCCGCCTGGGGGTACCGCTGCAAG
ATGAACTGCACATCCCCCTGTCTGGCGTATCCTTTGAACCAATCCGGCCGGAGGGCGATC
GCCCGCTCCGCGTCGTAGAGGGCCCGGTCGTACAGTTGATCACATTCTGCTGTCATGGCC
TCATTGCTTGCGTTCGCCCCACCGTTTTCGTTGCTCAGCTCCAATTGCATCTCCACGGAG
AGGTACACCGCCTTCTGTAGATAGGCGGCGGAGCGGTTGCTGTAGAGGATGGCGAGCAAA
TAGTTCACCGCCCCCGACACTTGTTGCTGTTGTTGCTGCTGTTGACGGCATAGTATCTCA
ATTGCAGCCGTGTAGAGTTGAATAGAGAGTGCAAACTCTTCCCGCTCAAAGGCATCGTTC
CCCATCGCTTTTAACTCCTCTGGGGACTTTCCACGACTGGGTACGTCTTCATGAAATGTT
GGTTTATTATTACTAGCACTCGTTTGATTACGATCCCGTGTTGGTCCTGCGCTATTCATT
CTACTATTGTTGTGATACTCCTCACTGTAACTATACCGATTGGCGTTCCGGACCTCTCCA
CCATTTCCGTTATTGAGGGCGTTTATTCTAGACTGGACTAGGGATGGAGCACCGTTATTG
CGGTTAGCGTCATTCTCATTACTGTCTACCGCGTTGGGTACCACTCCACTGTTAAACGCT
TCAATTTTCGCCTTTATCGAAGAAGGTGCATTGTTGGTCTCATTACCACCAAATTTGCCA
TTGTTGTGGTCATTGTTATTCATTTTGTTAAGTGCCTCTATTCGCTCTTTCACTGAGCCA
ACCGACGGTTGTGTGGGATTATTATTATTATTATTATTATTATTATTATTACTGTATTGA
TCTTCATTCCTGTTGAATGCTTCTAGTCTTGCCTTGAACGCCGCGGATTGTCCTTTCCCG
CCCTCGGCAGGATTCTTATTACTCGAATCGGAAAGAGGAGGTCTTTCCTTTCCTTCGGGC
TTTCTTGCTGCCTCACTACCGTCCGCCGGTGTACTGTTCATAATCTTCTCATCGGGGGGC
GCGATGTCATCGGCGGTTAGGCCCATCGCCCGCAAGAAAGCTTCACGGTCAGACATAATT
GTTTATTGATTTGATCTATAGAAAAAAGCGAGAAAGGAGAGAGAAATAACAGTCATCGAA
TTAGCTGGGGAGTAAAACAACAAGTCCTGATGAAAAGAAAAATGCACCGTTATGAAAATG
TTGATGTGTAGTACTATTATCCATTGATTGGTTTATATTTATACTTGCGATAGCCTTTTC
TCCTCGTCCCCACCCTTACGATACGGACGGTGTCGCGCACGGGAGCGTGTCCAGTGTCTC
TACCAGCCTCGCGAACACACACTCCTCCCCCGCTGTCGGGACGACATCCTTGCTCTTCCA
CCACGCCTGCATGACAGGGTGGTTGACGACCGTGGCGGCAACAAAGGAACAGTACCCCTC
AATACGACGGGAGTTGCAGAGGAGGATGGAGTAGAAGACCAGCTCGTCCACAATCCAGAT
GAGGTCGAGCAACAGCTGATGAAACGCCTTCCAGTCCGGTGGCCGGACCCGTCCCGGGGA
GTGCTCCGACTCCAACGCCCTACTCCGTCGTTCGCTCATATGAGGCGTGGAGGAGGCCGT
CGTGTCCAGACCCGCACCGAGGGAGCGGTTGGTGTTCTCCTCGTCGTCGCTGCTGGGGCT
GCTGTCGAGGTTCTCTGACCCGGTACCTCGCTTGGACTCATACAGTCGAAACAAGCTCAG
CGCTCTCTCCTCATTGTCGGTCATGACTCTGGTGAACTTTTGAGAAAAGCGAAACACAAA
GTGTTCGCTGATGTGCTGCCCGCCATACTTGAGAGGGTGCACCGTCCCGTCCCCAGCGTC
CTCCCGGCTGGCACTGAAGTTAATCCGGACCCGCTCGGTGGGGTTCCCCTCGTTCAGTAT
GTGCGCGTGTTCGTTCAGCTGCAAACCGCCGTCCCTGCCGGAGAGCGCCGCCGCCCTGGT
GGTGTCGAGCCGGACTAAAAAGTAACCCTCCGACTCTGCTGGGATCTCCGCCGTGGCAAA
AGAGAAAAAGCCGCTCACGTTCGTTTCGCCCATATTGTCAAATTGTATCTTGTCCTCCTC
CTCGCTGCCGGTACCGGCAATCACGTAGATAATGGGGGACTGAGAGCGGAAGGCAAACGT
CTGCTTCGCTTTGAGAATATTTCTCACCACCACCCTCGTCTCGCAGTAGGGCTCCTCTCC
TTTAATGATGAGGTAGTAGTCCCGGACTACCTCGAAGGAGGGCGGGAAAAGGTCGAACTT
TGCCTTGAACGTAAAGTGGGAGTCTCGGGTTTGCTTGCACCGAAAGACCACGTCTGCCTC
ACAGGAGAGGCCATACCCAGGCGGGGTGCGTAGCTCATCGCAGGTCAGAAGCAGCACCAG
TCGCACGCGAGACTTGGGGTCGACCACCACATACTTTTGACCAGACCCTGTAGGGACACC
GTAGACATGGCAAACCACTAACTTTCCATTAAAGGCATAACCGCCCTGAGAGCTGGGGAG
TTCCGTTTGCATGAAGTCTGTACTGGTGAGGGAGACCTCCCGTGCGTACAGTGGGTTTAA
CTGCTGGAGGGGCTTCAGCTCCTGGCGGAATGGGTTCACCACCGAGACGGGAAATTCCAG
CGCGACGTTACCGCGGTTGACAATCTCCAGTGCCACGTGCGCCCGTGTGGACCCGCCGCC
ATACAAGTGACCCATCGGGACCAACCGAGCCGTGTTGGATGTGACCCGTTGACCGGAGGA
GTCTATCACCTCGAACAGACCCTCCCCCGTCGAGGGCAGGAAGACATCCGCGGAGAGGCG
CAGGTACGCCACCTCCCCACTGTTGGCGCTGTTGGTGATGGCGAGATAACCAACAAAGGA
ACCAGCGTCCACGGAGAGTACGTTGAGACGGAGGCACTGGGTCTCCCCCGCCTGTAGCAG
GGCCGAGGTGGAGCCCAGGAGCAGCCACGGCTGGGGGCCCTGAGAGACCACGCTCACCTG
ATACTCCACCGGGCGGTCTTGCAGATTGTTCCGGATCGCAATCTCCGGCTGCGGGGCCTC
TTCCTTCGGAAAGGAGAGGGCAAGCGTGTAGGCACCTTGACAGCCAGGGACCTTGGTACA
GTTCTTGAGCGACAAGACACGAGTGGGGGTGGCGGGCATGGCAAGATCCGGTATCTTGAG
TTCCCGCAAGGTGTCACCCGCTCCCCCAATCTCCGCCTGGGAGCCCTTGGTGGGTAGCGT
AATGGGCGTGTTGGTGAGGGCCTCCCCGCTGCTGCCGGTGAGTCTGTCGTGCTCTGGGTT
CGCCTCCAGGGCACAGTTCGAGTTGGAGTTGTTTCCGTTACTGCTGGTGTCGACTGCTCG
CATTTCCCCTGTCGAGGTGGAGCCTCTCAAGCTCTCATACGAGGATTCGTCCTCGTCCAT
GATGAGGGGGACGACACCGACCCGAAGGGTGTTGACGCAGAAAGGGGCGTTGGAGTCCAT
GACGACGAGGGCCAGATACTGTTCCAGTAGGGACTGCTGGATCTGCGTGTTGTTGTTATC
TCCGTCCCCCAGACAGGTAATGAAGACCTGAAGTGCAACATTGGACTTGGCCGGCACACG
GACATTGTGCACAGTGCTCTTTCCGCCTTCCGGTGCGGACTGCTTGTGATGATGCTGGTG
TCCCTTGTTGGACTTGACGGACGCAAAAACAGTGGAGGTGACCTCGTGGGTGGAGGAGCG
GGGGCTCTTCAAATTGCTAGTGCTATGCTCTGGGGAGCGCACCGCCAGTGTCTTCACCTC
CACCCTCAGCGGCAGGGACAGGTGGTCGCTGAACAAGACCCGTACGGTCAAATCACAGTC
GTAGGATTCGCAAATGTTAGTTAACGTCACGTCTCCGCTGTAAAAAGAAAGACTGTTCGG
GCGCAGCGGTCGAACCAGTAGCTTGGAGGGCACGGTGAAGGTATTGAAAGGTTCCAGCAC
ACCGAATATCTCAATGTCCTCGTCGTCGGTGAGGGCGCTCAGAAATGCCACCGTACCGAG
CCACATGTTGTTGGACGTACTGGAGCGTAGCCGCTTCTCATTTTCACCCATATTATCAAA
CGTCCAGTTGTCCACTTGTAATTTTCGGCTTCCAAAGAATACATTTGCCAATTTCGTGAG
GCACGTCCCGTCTGTCAGGACGCAGCGCAGTCGAATCTTTTGTATCTGCTGTGCGCGTGG
TTTAGTACCGCCAGAGTTCCCTGCGCCTCCATCTGCCTTGCCCGCATCCTCCCCGCCCTG
TTGAAACGTCAAACGATCCAGTGTGGAGGTGGCGTCGTAGTTCAGTAATTGTAGTTCTAG
CATCCCTTCCAGCTCACTGTTGTGCTTCACGCTCAGCATCAACTCTGTCGCCTGCTCTGT
TCCGCTCACATTCCAGCGTACCTCCGACAGGATGGAGGGGGCGGAGGTGCTCTCAATTCG
CAGCGGTGGGAGCGATGTGCTGTCCTTCACGTCCGCGTCTTGGTAGGTAAGACTGAATAC
CTTCCAATAGTACTGCCCAGTGAAGGTGACGGCAATGTCATTCTCCGCATTCAGCTGGTT
GACAAAGAAGGCCTGATAACGGAACGGTCCTTGTGTGGGTATTTGCTTCAGCTGTAGGCT
GGCGTCCACGGTGAGGGAGCCGCCTGGAGGGATCTCCACCCGCGTCGAGGAGAAGCGTAT
CACCGGCTGGCACTCCACCTGCAGCTGAAGCGGCAGGAACTCCGACAAGTTGCGAAGCAG
CACCTGCACCGTGGTGGGGTTGGCGGTGGCATCCTCCGGCTTTGGTCGATGTCGGTTCCC
AACTGCCACGGTCCCAAAGTTTATCTGCCGCGGCTCCGCAACGCCCTCACTGACCGCGAG
AGAAACCGTAACCGGTATAACCAGCAAACACTGATCCTTCACTGGGTAATGCAGCCGCGT
GAGGGAGCGAAGCACGTTCATCGCGCGGGACTCCACCACCTCCTGTACGCACACCTGCAC
CGTCGTCTGCAGACGCACCAGGTGACAGTCCGACAGCAGCGCGATCTGTTCCTCGGTCAA
AGGTGGGACCCCCACTAACCGCCAGTACACTTTTACATTCGAGTGTGCCGTCAGCTTTAC
CCCGCCCACCTCCTCCATCACGAAGGACGAGGGGCGTCGCTCATTCGCTGGGGACTCGGT
ACCACACATTACAATCGGCATATCCTCGCAACGGGAGGTAATGATGAGGTCCTTGCTGCC
GCTGTTGCGTATCGTAGTGCTGCTCTCCCGTGACATGTGAAGAAGGATCTGGCCCTCATC
GTCGCGGGTCACCGGTGCCACCGGGAGGGACACCACGCCGTGACTTCCGGGGGGGAACAG
GGCAGAAACAGACTCATCCAGTCGCAGTGCGGTGAGCGAGATGCGGATGGGCTCTTGCAG
GCAGGAGAGGTTCTCCAGTCGCAGGTGCGCCACCACCAGACCAGGTGCCGTAAGATGCAT
CACAACAGGGACGTTCCTCTCCTCTCGTGGGTGCAAACTCATAATAAGCCTCTCCAACTT
GTCCTCTCCCACCAACAGCACCGTGCTGGGCGACGGCGGGCTCAGTCGCGCTCGTATGGT
GTAGGTGTTGCTGGGGTTGATGACCTTGACGTGCGTGTGAACGACATGCTCGGTCGGGGC
CACGGAGCCCAAGTCAAGGGAGGTGGTAGGAACCGCCAGAAAGCCGCTGCCGACCCGGCA
GGTCACTCGCACAGCTGTACGGCCGGTGATATTGTACTCCCCCTCCCGTGTGGACGGCAC
AACTGATTCCAATATAATACCACCACTGATGGTGTGGACGTCTTCATTGGTCGACTTTGG
GCTTGGGGTGTAGCGAACATAGACACGCACCGTACCTTGCACAAAGTTTCTCTGAATCGG
CACGGTGAGGGGCGTCGTGCAGTTAATATCCTCGTAAAGGCGAATCTGCGATGGTTTGTT
GGCCCTAATGTTCAGGTAGTGCGGGTAGTTGAACCGACTTCGAATCAGCAACAACTGTGG
TTCTACTTTCGAAGGATCGCACGGGGTGATAATGTCAGGAAACACCAATTGCTTCGGCTC
CGCCGTCAGCAGCTCCTCCTCCTCGGTGGGATTCAGCTCCACGACAAAATAGCGAATTTC
CGCCGTGTTTTGCAAATTTTTCACGGGAATGGCGTACTTTTGCGGTCCAACACTGCGGGG
TGTGCATTCCACTACAATAGGGAGTGTCTCATCTTTTTTGACTAAACCATTTCTCGGAAA
GAACTTGAATCTCGCCTCAAGGGCGTAGGCGGTGGAACAGCCCAGACGCCGTGGCTCTAG
TACCACCACCGTGGTAGAAAGGGAACTCTTTACAAAAAAGCGGAACTCGGTGTGGTCGTC
TACGATCGAGTTTCGCAGCACCACCAGTGGACTTCCCATGAAAAAGGAAGTCGGGCCCTG
GGCTTGATCGTCCGGCAGCAACTGCAGACACGGCGGGGGGGCTGACCTCCGCGAGTGTGC
CACGAGATTGTTGGAGGGGGTGCCCGTCTCACCTTCCGGGCGTACAACCGTAATGTCAAT
CGGGACAATGCGGTTGACCTCTTGATCCTTTGCCTCAAACAGCAGCAGATTGATGGTGTT
GGTCTGAACAGCCGGCAGCGTCTCCTCCGTGTTGCGGCGACACAGAAGACCGAAGGTGAT
GGTGATCGCCTCTCCAGCATTCATAACAGGGAGCAAGATACCCTCCGTCGCCAGAACAGT
GAGTCGGTCGAACTGATAACGGTTCTTGGTCGTGGCGGCACCCGTGTTGGGGGCGTCGTC
TTCACTCTCCGAGACATCCGTGTCCGGGGCGGCGGCGTTCTCCAGCGCGGACAAATCCAC
CTCCTCTCCCTGAAGTGCCCTCTTCAACGCCTCTATTCGGGCCGTCGCCACCTTCGCCTT
CTCCAACTTCTTCTTGCGCTCGTAAATTTTCAGCTTGTGCTGCAATTTTTCAATCTGTTC
TTCAATCTTTCGTGTGGAGCCGGAACTCGCCCCCATCAGCTCCACCTCCACCTGCACATT
CACGTCAACCCCCTCAAAAAGCGACATTTTACCCTTGTCGGGCGCGTTCTCACCGGCGAG
CGGGCTGCTTGTCATGGTGTCGAGCTGCAGTCGCACCTGTCGCTTCGTACCGCTGGTGTT
GGACAGGGTGAACTTGGCCCCCACCCTGCTGTTCTGCGTGGTGTCCTCTGAGGAAGGGAT
GGCGATCGGCCCGAAGCTCCACGTGTCTGGGCTGATGTCAAAGGTGTCTACCTTAATGAC
GGACGCCTTCAAGGTCACGGAAACGGTGTTTTTGGGATCCAGCAGGTTTATAATTCGAAT
CTTCTCGTCAAAGGCGCCCTTGATACCGGGGTGGAACACCACCTCTATTTCTTTGGTTGC
GAAAGGGTCGGAATGGTGAGCCAGATGGTCTGCTTGTCACTCCCTCCCATGCGGATGTGG
CCGGCCGTCACCGACCGTGACTTGGAGAGGCACACGTAGAGAAGGGATTTACACCGATTT
ACCAGGGACAGTTTTGTTGTTTTTTTCGTACCAATATTCACCTCGCCGAAGTTCTTCGTC
CTTTGACCCAATAACTCAAAACTGGTGCTGCACAGCTTGTACGAAAGGCGCACGAACCGC
GGTGCCTCAATGGAGTCGATCGAAATCATAAGGCCATCCTCCTTGGTGATCATCTCGCTG
GCAAATGACGTGCGAATAATAATCGCATACACCTTGACAGAGGAAAGCGGCTCCACACAA
ATCTTCTGAATCACTTCCCCATCTCGCAAAATTTTAATCAGTTCCTTCCTGAGTTCCTCT
ACTCGCTCCGCGTTGCCTTCCAGTACTTTGTTGCCATCCTCCGCGATATTTCTGCCCTGC
ACAAGGAACCTAAAATCCGCTTCGATGGTCTCCATTTGTTCTGCCCTCGTCAGGGTCACT
AAACCGGAACAGCTCCACCTCTGCCGATGTACTCCGCACGGAGAGGTTTAAAGGGTAATC
GACCTTGGACTGTACCAAATAGGGCACCAAAAGTGGCGTATTCGTGAGCGCCACCAGGGT
GCTCTCTTCTCGCTTCTCCATACCAGGCGTGATGGGATCCCAGGAGTAGAGTTCATTATG
GAGCTTTGCCTCCGACGGCGGCATGTTATTCGCATCGATGGTCACCACTAACCGCTCCTC
CTTCGGGTTGGAGGCATTTGTGATGAACAACTCCTTGTGGTACGTCGGGTTTACTCGCTG
CGGCGTTATGCGCAGCGTGACCGGAAGTGAGCTCGAAGGAGCAATGAAGAACTCCTCATT
CACCTCCCTCCCGGTGTTTTCCCGAAGAACCGCACCTTCGATAGAAATAATTTTGCTGCG
AAATTGAACAATCACGCTACCGGGAAGCGGGGATTGATTTTCAATTGAAAAAGTGTAACG
TTTGCACTGGCCTACATGGCAATCGCCGAAATTAATATTGGATGGGGTCACTGTCATCGT
ACTTGTGTACAAGACAGCAAAGCACCGAACCACCACCTTTTGCTGTCTGTCCGAACCGGA
CCAAAAAAGCAATTCGAGTTCAAACTGGACCTTGGCGGTATCCTTGTTGTTGGTGGCGTT
ATAGGACGGTTGATACACCAATGTGATACTTTTCCCCTGACCCGACGAAATGGTCGTTTC
ATCCACCGCGGTCTTATCCTTCATCAGGCACACCTCCCCTTCGCATTTCCATTGGTGTGC
GTCGCCTAATTTCACCCGCCACGTCTTCTTTCCCTAATACATTCAGACTAATCTCTGCCG
TTGTTTTACCGCCTCTGTACACGTCGCCGAAATTGACGGAGGTGTCGGGCAAACTCACAA
TGTCCCCCTGCAGCTCGCGGACTACGTTAATGTTAACGTAAATAAGGCTGGTGTTTCGTC
TATCGCGGAGGTTGTCGCACTGTAAAGTAGCTTGAAACTGACTATTGGTGACGTTGCTCG
CTGTCCGCGCCATCAACGACATTTTCATGGAGCCGTGAGCTTCGAGATAAAGACGGCGAC
CAAACTTTGGCTCCTCAAAGTGCTCCGACTCGTATAACTCCAGCTCAACCCCCTTCACTG
GAAAATTTTGCATTCTGATCACAAACGGCAAAGGCCGGTTGGAAAGATTGGAAACTGTGA
AATCGATCAGTTGTGTCTTTTTGACCGTCATCGTGGCCTGCAGTTCTGTAGTTGACAGCT
GCAAAAACGATACGAAAACATTGACTGAAAACGGTATCACGATAGTCTCTGAGAGAGTGG
ATGCTCCAAAAACATCGCCAAATGAGCTCTTGTTGCGGGTCAGTGCGCTCTTCTTGCCGA
TCGAGTCCGCCGGAGACTCGGGTGTCTGGTTTGAAGCCTGACTAGCAGAACAGCACATCA
TTTCTATTGTGCCGCCGTGGGTCGTTGGAGGCGACTGCGCTGTGAGGTGTGCGAACCCTG
CGGGGTTTGCCTGAAACGACACAACCAAGTCTTTGGACTCGCCCGCGTCTAACTGGACGG
ACTGGAGAAGTCCGATGGAATCAAACAGCTCGTTATAGGCAATCTGACTTTCCTTTGCAT
TTTCACTGCCCTTCTGTGCGTTCCAGTTTTCGTTTCTCTCCTGAAATCGGATAAACGGAG
AGCTGGCAGACAGGGACACGGTGACTGGATAGGCCTCTTTATTTTTTAATTTTAATTGCC
GATAGTTGGGCATGTCGTTGACCGCCATGTCGTCAAAACTAAGAGAAGCCGGCTGTGCTT
CAATCATTTTTTGCTTCCCTATTCACTTGTTTTCTTTAGTGAAAATTGATTTAAAAAAAA
AAAAAAAAACTGCTTAAAAAAGAAAGGGAAGAGTGTATCGCACAACGGAGCACGAAATAC
GAAACGACTGACGCATCCACAGAGAAATAGTTTTGGGTTTGACGATGTCGGCGGAAGCCG
TAATGCAGAAAATTCAACAAGGCTTCACTTTGAAGTGCTCGCTTTGACCCAATCCAAGTA
GTCTGGGCTGCCTTTCCCCATAGGTACACTGACAATTTCTGGGCAGTCATACGGGTGATT
TTCCTTCACTATGGATATAACATTATCCACTAGATGGGTCTGTGTTTTCACGAGTAACAA
CACTTCCTCATCCTCCTCGACAGCGCCTTTCCAAGAATAGACTGAAGTCACCCCGGGGAC
AATGTTCACGCAAGCTGCCGCCTTTTGGGAGACAAGAAGATGCGCGAGCTTTTTGGCTAC
TTCCCGGCTGGGAGATGTCACGTAGCACATTGAGAACATGGGTGTATTGTGAGCAGTAAT
AAGAATAAAAAAACTGGAAGCTGGGCAACCTTTAAAGGACGACAAGAAGAAATTGTAGAC
GGTGGGATGTAATCATGAACAAGCTGGTGGGCACACTATTATTTCCTTAAGTTGCTGAAC
GGATCTGGTGGGAAAGAGTTAATAACGGAGGGGGAAAAGCCGGCACGCCAAAGTCGAAAA
AAAAAAAAAAAGCAGATGTATTAACTTCGCATTTCACGAGTTTCAACAAAATCCGACACA
CTAGAATACGCCTCCGTGATGAACGTTTGGAGCTCGTCGGACGGCGTTAATTGCTCATAA
TTAAAGAGCAGTTGTGAGTAAGGCAGCAAAACAGGCTTTCGCCCTTGGTACCGTTCTTTG
GTGATGACATTCAGTGTTTCACGAACGCAACTCTGTGAAATCCAATGTTTCGTATCGGCG
TCATTGCTGAAAAAGGGTTCCATCAAGGAGGAGCATTCAACCCACGTTGGCTTCGGGGGG
AAGTGATAATAAGTGAAAAGGGCGCTAGAACTTTCGGAAAATCCTTCGTTTCCATTGAAA
CCGAGCAGCTCCGCCTCGGCTGGAGAGAGGCTGAAAAAAAGATCACCGCATCCGGGAAGC
CACAAGCTGATAGGGCTCTCCATGTATCTCGGCGCAAAAGCTTTCGTGAGAACCGTTTTC
GGTTTTATCCATAGATTAGAAGATAGTCCCTGTCGAATACAAAACTCATTCAGCTGGAGA
AGTACCAAAGGATCGCGAACGTACTCGCACGTCTCGACGAGAAAATGCAGCTTGGTGCGG
TTCATGGTAACAGTCGCTTCAAGAAAAGAGGAGAAGCAGCCCTTGAAAAGAGGGAAATGG
AAAAGGGAAATACGAACGGAGAAGAAGAACTCTGGTCATATGCCCCAGCTTACCCTGTGG
CCCAGAGAGTAGAGAGAATGCTCACACACACAAAAAAAAAGGAAAAAAGAAGATGCACAA
AGAAAAACGGTTTAAAACTTAATGGGTATATAAGATGGTATAATGTTCTCTACTTCATGC
GAAACCCGTTCTTTTTTAAAAAGGCCGCGATAGTAGCGGTGCGTCCCGTGAAGTTCTTGT
ATGCGTCAAGCGCACTGACTGAATTTCCGACGGACAGCACTGTCTTGCGTAGATGGTCGC
CGTTTGTGCGGCTCAGACCGCCGTTTTCTTCGATCCAGGCGAAACCGTCACAGTCCAAGA
CGCGTGCCCACTGGTACACGTAATAACTGGATGGGTAGGCTCCCTGAAACACATGGGCGA
AAAACGAACTGTGGTAACGAGGGGGGACCAACGGCGAGTTGAACTTGTGCACAGAAAGCG
CTTCCTTCTCCATTTCCGACGGAGTCTTCAGCTGATCAGGGGTTTTCGCGCAGTGCCAGT
GAAGGTCAACCACGGCGGCTTTCACCACCTCCAACGTCGAGAATCCACTGGAACTGTTTT
CAGCCATTTCCATCTTTTTGACAAGATCATCGGGTATAACTTCACCCGTCTCATGATGGA
TGGCGTAGTTGTGAAGGACGGGCTCGAAGGTGGCCCAGTGTTCGTTGATCTGGGATGGGA
ACTCGAGAAAGTCGCGGGCGACAGACGTTCCGGAAAGACTTCGAAATCTGGTCTTGCTTA
GCATACCGTGAAGTCCGTGACCAAATTCGTGGAACAAGGTCACGACATTTCGGAATGTCA
GCAAGCATGGCCGGCCGGCCTTTGGTTTCGGAAAATTGGTGACATTCACCACAACTGGTT
TTTGTCCGAGTTCAGAAGTCTGTTCCACAAAGTTGCTCATCCACGCGCCGCCCTGCTTGT
TGGAGCGGGAAAATGGGTCGAGGTAAAACAGCGCGATGACCTCCCCCGATTCTTCCAAAA
CTTTGTAGACGGTGACATCTTCCTGATAGACTGGAAATTCAGTGGTTTTGCAAAACTTCA
GTCCGTACAAATTTTCCGCGACGTAAAAGACACCCTTTTCGAGCACGGAATTAAGCTCAA
AGTACTCGCTGAGTTTATTCTCGTCAATGTCGTACTTGGTTTTCCGCGTCTGCTCAGAGT
AGTACAGCCAGTCCCAGGGTTCCACCTTGTCCACGCCGACGGTTTGACGAACTTCTGCCA
ACTCTTCCTCGAATTTCTCTTCCGCCAAATGTCCCATCTCCTCCATCAGGGCAATAGCAG
TTTCCTGCGTGGCCATCCGATCTTGCATAACGTAGTCGGTAAAGCACTCCTTTCCGCACA
AGTGGGCCTTGTCCAGGCGAAGATTTGCGATTTCCTCCAAAAGCGGTCTCGTGTCCAATC
CCCCTTTTTGCTCCGCGCGGCTTGTGCTCGCCTCAAATATTTTCTTTCGCGACTCTTGGT
TGTGGAGAAACGCGGTAATGGGTTGTTGAGTGGTGTTGGTGAGGATAAGCGCGAATTTGC
CGTTATGTCCCAACCGCTCGGCGTCCTCACGGGCTTTGTTAATGTCTTCCTCCTCCAAGC
CAGCCAAATCGTCGGCACTGTCGAAGAAGACGGCGCCATCCTCCCGGGCGGCGAGCAGCA
AATTTCCGAAAGCAGCCTCCAGAGACGCGAGTCTCTCGTTGATTTTCTTGATCTCCTCCT
TTTCGTTTGGCGGAAGATTTGCGCCGGCCTTGCAAAACTCCTTTTCGTAGTAATCGGTAA
GTTTGGCCTCCTCTCCAGACAGCTCGGATATTTTTAAAAAGACGGAGTGAACACGCCCGT
ACAGTTCTTCGTCCAAAAAAATCCGATCAATGTGGGCGGCGAAAGTGGCCGCGTAGGCCT
CCTGTAACTTTTGCATCTCGGGGGTTGTATTTGACGCACACATGTTGTCAAAAACCAACC
GGGAGCGTAGGAACGCTTGTCCGGACTTCTCCAGACTAAGGATGGTATTTTCGAACGTGG
GTTCCGAAGAGTCTCCTTTGATGGCATTAATTTCTTCGATTTGCATCGCCATGCCGGTTT
TGAAAGCCGGTTCGAAATGTTCGAACTTGAACAAGTCGAAAGGCGGCGCCTGAAGCGGAA
GGGCGCTTTTCTCGAGCAGAGGGTTCGACATTCTTTTTTTTTTTTTTTTCCGACAAATAA
TATAAGGTAAGAGAAGCTTTTTTCGACCTTTGGGATAAGGGGGAGAAGTGGTTTGGGCTT
TTGTTTAGCGGGGGGCGAAGGCTGGCCCTCCGCGGAGGGGGCATCGGCCGATGGGCAGGC
GGGCACAGGCGTCCTGCGTCGGCGAGGAGGCATCCCCTCCCGCGGAAGCCATGCTCGGCG
GCGGGACGAGAAACGCCCCTCGCTCGGCGGGGAGGCACGCCACTCCTTAGCCCCAAGACT
AGCTGGAAAGAGAGGGAGGGAATAGTGGAAGACAGAAGAGGGGAAAGGGCCAAGGGAAAC
CACCACAGATGCCGTTTCCCAACCATCCCCAAAAAGAGCAGTTTTGAGACCAACACAGCG
GAATCGACGAACATTCAAAAACCGGAACCAATTAACTGTTTAGCAAAGAATCGGGCGCTT
TGCCAGAGGCCAAACGCCTAGCAACTGGGTCCCTCAACGCGGTTCTGTCTACCGCAACGA
GCGGCAAGTCTCTTTGAGCAGGAACATCCAGCAGATCTTCATCTTTGCCGTAGTTCATGG
GAGACTCGCACCCCACGGACAAGCCCTTTTTCTGTTTCGGCGCGCGCACGTAGTGGTCAT
AAAACGAAGCGGGTCCGTTGTTGTTGAGATCGACGCAGGCCTGCGTTTCACTGTCGTAGG
GCGCCTCGTTGATGGGCTGCATCAGAAAATCGCTGTCGAGGTCGACACATTTCCTATTGT
AATCTGTAAAGTTTGACTCTGTTGGTGGGGGAACCAACTGTAGAACAAAGCGTTCGCCGT
CGTCATTGTCGACGGAAAATATCTCCCTCGCGTTGGCGTCCATGACTTCTCTGTCGTACA
TAAAAAAGAGAGGAAAGAGAGAAGGGGGGTTGGGGTTTCGGCACACGTGGGCGGAAAAAT
AAAAACAAAAGTGTTGCCCTACTATCGTCCCGTCCCGCGTTGTTCTTATTGTTATTTGTG
TTAAAACGCTATTAGTTAGGTCTATGTTCATATATGTACATGCATGCGTATTTATCCGCA
ACAATGACAAAAAAAGAAACAAAATTACGCCAATTCCATCTCCATTACGTGCTGGAGGGC
CAACAATAATTTTTCACGAAACACTTCAAAGTTGCTGAACGGTGGGATCGTGATCAGCGA
CGAGCACGACTGCGCCCGTGGCAGGTGGTCTACACTTTCGTTATTCTCCGTGATCGTGAT
CGGGGTGAACAGCGGGAGGCGGCGCTGGCCGCTGGCAAAGCACAACAGGGACGACCGTTG
CTCGTCCGTCATGGAGGCTACAATCTGCCAAAACGCCTTCTCCCTCGTCGGGTGGAGGTT
CGTGTTGATGTACCGCTTCAGCTCGTCAATCGACAAGTCCCCGCTGCCGCAGACCAGCTT
CTCCAAGTCCTGCCAGGAGGAGCACCGCACCACACGCCGGGGCATCACGCACCAGAGGCC
ACTGCGCATCGCCTGCAGCTGGAGGTCCATGGAGTGCACCAGGCAATCCTCCGCAATCTG
CCGCCGCCGTCTCGCTGCCATGTCGCTGCCCATCTCCTCCTCATCCAGCACCGCCACCTT
CTCGGCAAAGTTGGGGATGATCTCCTCCGCCACCTCACTCATCAAAAAGGCGTCGTCCTC
GATACTCTTTTCCACCACACTGTCGACGTGCTTGTAGTAGTCCTCGATGGTCAACACGTC
GTCAATCAGAAAGCGCCAAATGTAGGGGGAGAAGTCCATATTGAGGGGGATCTTGGCCCG
TGCGCAGTAGCCCATCAGCTTGCCAAAAAAGTTGAACAAGGTGAGTTCGAACGGGGAGGT
GGCCTGGCTGTCGGGCACGAGCGCCACACGCTGCGAGTTGTTGACAAACACAAAGAGCGG
GTTGCGGTGGAACTCGCTGTGGGGGTGACACTTGTCGGGGTGCTGCATCATCTCGTCCGT
CAGGGCGGTCCACACCTGCCGGTAGGGGCCGCCCATGTCAATCGGCGCGTGCCCGGAGCC
GCTCGCCTGGTAGTTGGCTTTGAAGAGGGGCGTCACGGAGAGTTGGGCGTCCTTGTAGGA
CCCGATCTGCTTGTACAGCTGAGCAAGAATCGAGTGATTCAGCGCCACTTCAGGGGTGCG
GGGTAGCGTGGAGTACAGCTCTCCTACATTCACCAGTACGGTGGGCAGGTTCGACGCCTT
CTCCATCGGCGGCACGTTGAGGAGCAACTTCTCGCGGAAGGACGCCCGGACGAGGGACTT
CAAATAGATAAACGCGAGAGAGAGGGAGCCCTGGGTGGTCGGCCCGTCGAGGTCAATGAA
GCGGGTGGCGGTCGCCATGCAACTCTCCACCACCGCCACCACCTGCGCGTACTCGTCCAG
CTCCGTCTCCGACAGATCTTGCAGGGCGGAGTAGCGGGGAATGAACTTGGTCCGTGGGTC
CATGAGAATAGACCCCGGGTTGGAGGTGGAAATACTGGACCCCGGTTTGTCCGACTCCAT
CCGCTTGCAGTAGTCCTCCAGGTCCGACAGGTAGGAGGCGAGCTGGGTGAAGAAGCGCAG
TGGCTTCACGGGCAACTTGCTGCGTTCGTTCGCGTCGTACGTGTCCATCAGCAGTCGCGT
GTACCGCAGGGAGAGATCCGTAAAGTTGTCCGGGGCGTACTCAAACTCCTCCGCCTTCAG
CCGTATCTTCATGCCCACACTGGTACCAATCGATGCAAAAGCGTACAACGGCTGGGAAAA
GGTGATTGGAATAGGGACCGGTGGGCCTGTCGTGCCATTGACGGACCAACACACCTCTTT
ACTGTCCATGTCGAGCAAACAGCCAATCACGCTGAGTGGGCCGGCCTCCACTGGGATCTT
GTACTCCTCCTTAAAGTCGCGCGTGGCGATGTCGGTGCCGCTAAATGAAAAGCTGTACCG
GTCGCAGCCCACGTGCTGACTAGGGACATCACTGTGTTGGGAGGTACCCCAACCCACCGC
AAACGGCGCGTTGGACCGCTCGGGGAGCACCACCTCGTAGTAGAACTTGCCGGAGGGGGC
GGCGGTACAGGAACTCATCACCTTACCCACCTTCAGGAGGTTACCCTCCAGCTCGCCAAA
GGTACAGACAATCTCCACCTCCGTATCCCGCTTTGGGATTCCGTCGTGCGCAGTCTGTAT
AACGTTCGGCAGCGGAGTGCCGTCTCGGAGGGACTTCCACAGGTCGATCAGACAGAGGAG
AGACTTTAGCGGCAGCTCCGGTACCGAGTTTCGCATCGGCTCCTTGAGCGTGAGCACGAG
GTCCACGCCGGCGGAGATATCCTTGTTGGTTTCGGTAAAGCACAGCGTCGGGGCGAGCTT
CTCTCGAATGTACATGACCATGGGCGAAAAGAGCTGCACGTAGAGGGCGATATCGGTATT
CTCATTATTCTCCACAAATGTCGTAATGTCGCGAATGATCTGCTGTCGTCGAACGCGTCC
GCAGCGGTGCGCCGCCACCACCACCGCATGCAGCGCGTCCCATATGAGGCTCTCCGGCGC
TTGCGAGAACACATCGGGCCGGAGGAGAAAGCTGCGCGTCAGGAGCTGCGCCAGAGTGGC
CACATCCCACGGCTTTGCGGTCGTGTCTAGTATCTCCACCGTGCATTGGTTCATCATAAA
GAAGAGTTGCTGCAGCTCCACGTGCCTGCTGATGATGCGGTCGGTAAGCGGGTGGTTGTC
GAACAGCGACACCCGCTCGATCAGCTCCTTGGACACCGTGCGGGTCTGGTTGGAGATGAC
GAGGTAGAGGTGTCGGGCGAGGAGCACAATGAGCCGATGCATCGAGTCCGATACCTTGAA
GCTGGGCGGAGAAGGGGTGGTCACCTCCAGGTAGTTGGGCAGCGGCTCCACATGCAGAAT
CTCCGTCGAGGAGGGAATCAGCGAGATGCGCTTCGTCGAGATACACCAGAAGGAGCCCAT
CTGACCCTCCGCCTGGCGGCACGTCCCCTGCATGTGAAACCCTTCCGCGTCTAGCTCCGC
ACTCACCATCGAGTGTGGTGTGGTCTTGAACTGCTTGAGCACATCCTCGTAGACAATGCT
GTCGGCCGATACGTTCTTCACCGCCTCCTGCACCGCCTCCGGGGTGTCCAATTCGCTCAG
CTGAAAGAGGCACAGATGCACCCGTCTCTCGTAGCGACTGTGGTTAAAAAGCACCGTGTA
CTCCTCCCCGGCAATCGTCGCCTTACCAAAGTGTGGCGCCATGAAATTGATCTCGCACAG
ATGGCTTTGGTTCTTCCCAAGTTCTACTTCTCCCTCCCATATACCGCTCACGGTGATGCG
TGCCGCCGCGCGGGCCGGATCCGAGACACGGATCGTGTGTTCCAGTAATGTGCTCGGCAT
GCCATCCGGGACCTGTGCCCACGGCTTACCATTGCTCTGCTTGACCGGAAGGGCACGACG
ATACGACATCTCCACCCGCTCCTCGTTGGCAATATTCTGCAGTCGCAGCTGTTCTCCTTT
TCTCGACAGTATGCGATACACACTGTTGTCCTCTTCCTTGTTGACGCAGCACACCAGCAT
GTCCTGCTTGTGACGGCGGCGGCGCTCATCTTGACTAAACGTGGGCACAAACGGTGCGAG
TCGCTGCGAGTCATTCAGTGTCTGCATGCAATCGGCAGTCACCGCCACGGAGTCGCGTAT
CTCCTTGATGAAATAGAGCGGCGTTTCGTTGCTAATCTCCACTGAGGAAAGACCGTTGAT
AATATCCAATAATTTGATGCTGTTCAACATGACGAGAGGTGTAAGCATCTCATTCTCACA
CAAACACGCAATGATCAGCAGCAGCCTCGAAATAACAAACCCTTCCTCAATTGTAGCGCT
CACATTCTTCGAGTCCTCGTTCAACACCCTTTCCTCCTCGATCGACTCGTACTGGTCAAC
CAACAGCGCGTAGTCCGGCACCTCCTTTGGGGGGTCCCCATTGAGAAACTTTATCTGCAC
ACGCTTGTCCGCCGCCAGACTGGTCCCCTTCACCTGCACCATCTTTTTCCCGAGGAAGGT
GTACCCCAGCAAATCAGCGAAGGTGGGGCTGGATAACTCGGAGCTCGGGTAGAGCGGCAT
GCGGCACGACTCCGTGGTGAGGAAGCGAGAGGAACCGTCCCCGAGCTTCACTTTCACAAA
CCGTGGGTTGACCACCTCTTCCACCGTGGCGGGGACGGTGGCATAAATCTCGGGAAGAAT
GGAGGCCTGGATGTTCTTCTTTCCTAACGAAATGAAGCAAAACACGGATTGGGACTTCTC
CAGGGAACTGGCCTCGGCCGATCGGCTCGCGGAACCGGTGTTGAACTCCAGCGCGTGCGA
GCCGACCACAATCCAATCCCGTATAATCGTCACCGTCTTGTTCTCCACGTCGACATCAAA
TGTGATGCGAGACCCGTTCTGAAATCCGTATGGACACCGACTGACATTGTCCAGCTTGCA
CCGGACGTTGGGGTCGCTGCAGTACGTGACGAGGTGGGGGGCCATGGCAAAGCACTGCTC
CCGTAACTTCTCTCGTGGCGTGAAAATGACTTCCTCTGAGGTGGTAATACCAATGAAGAC
GGGCATGTCGGCCGTGAGGGGCTCGCCGCCGAGGGTGGAGACTACCGTCGTGAACTGGGC
TCGCTTGCCGTTGTGCACCATGCCCCACAGTCCGACGGCATTCTCCGAGTAGGACTCAAT
CAGGCAGTTCATGTACTTCTTGGGTCGCTTGCACCCGGCACTCTTAATATAGGCGCAGCT
CGTACCGGGGACCACCACCTCCATCCCTGGCGCCAGACGCGCGGGGGGATAGTTGGAGTG
GGCCTGGGACTTGGACTCCCCCATCAGGGTGAAGGAGTGGTAAGAGTGGATGCACATGTT
GAAACAGTTACGACAGAGGGAGTAGTCGGCGCACTCGTTACACTTGAACCATGTGCTAGA
GAGACGCGACTCGGAGTGTTGCGCCGTGCAACCATCGCAGAATCGTCTATCCTTCGGGGG
ACATATCGCGAGGTGCGGCTGCTGAATCGGAAGACGGACCGCAGGGATATCGCTGTTGGA
GCCTAGCAGTACCGCCACCGCCTCCGTGTTGAAGAGGTGCACGAATGGGTACAACTTCAC
GGGAGGTAGATTGTCGTAAATAAGCCCCAGGCATACCTCATCGCCGTTGATGGGCTTGCG
GAATGCGTGCATCGTACCGGGCTGCTTGCCATTTCTGGTAATCTCCAACCGAATCGTATC
GCCACTCACAATAATGCATCGTGGCTCCGCCGTGATCGTAAAGTTCGCGGCGGGGTGCAT
GTGCCTCAAACGCCAAGGGGTGTCGTCCATGTCGTGGATCGCCCACACCTCCGGCACCGT
GCTGTGCAGCTCCTTCCTCTTCCAGGTGAAACTCTCCGCGCACACACCAAAGTAGTAACC
ACCACCAAGGATCTGGCCATTGTGTCCACGGATGAGCTGACACCGTATGCTGCACTTTCC
TTCCAGGGGCACACTAGGCTCCGCGATCGCGATGAACGGGGTGGAGGTGTTCTTGGACTG
GGTGTGCACCGTGGCCAGTCGCCCGCAGTACTGTGGGGAGAGGAGCACGCTGGGGTGGGA
CAGGTCGGAGGAGTACGTGTAGTCCAGCGGCACGAGGGGGACGGAGCTGGGCACATGATT
GGCACTGGCCGCCTTGAGGCTCTGGGCATAGTTGGAGCAACGCGTACCGTGGAGTAAGAA
GTCCCAATGATCCCTCTCGTCGTCTAGAATCTGCTGCCGTGCTGCCATTTCCTGACAGTT
GAGCGCTTTAATCGTGATGAGAGGCACCACCAGTCGTCGTGCAGCGGCCACCAGCTTCTC
TACGCACTTGGACAGACCGTGGAGGGCGGCGGCGGACATGTGCGCGTCAAAGAGGCACGT
AATCTTCGCCTTCGCCGGGGTACGCAAGTTGTACATGTGCTCATAGTTGGCCTCGTCGCC
AATGGAAAACTTGCATCGATTATCTGTAATACGAGACACCGTCACAAACTGCCGTTCCCC
GGTGGAGTTGCGTAGTTCGAGGACGCGAGGGTCCGCTACACTGTTGAAGAGGGCCAACGT
CACCTTTGGGTGCTGCTGTGTCTCCAACTCCTCGCACAGATGGGCGGAGACCAAGTCCTG
AAACGGGTCTAGCGTCAGCATGGAGCGCAGCACATCGACAGAGGCGGCACTCAGCAGAGT
GGGAGCCGTGATGGGCGCCGTCATCTCGCCCGGCATGATCGTCGCACTGGCGTCGTCGTT
GTAGAGTTGCACGAATGGGACGAGATCAATGTCGGTCGGAATACCATTGAAGAGCGTTTT
CAGAAACTCCCCCTCGCGGTAAAAGTCGACACTCCGCGTGTCGCGGTTCACCACCACCTT
AATGACATCCCCGTTACCAAACGTGCGTTGAAAGTTGTTCGACTTCACCGTCGGGTTCGT
CGCGTGGGACAGCTGGGGCGAGGTGTCGTGGATGGCCCAGACAATCGGTGGCTTCACCGC
CTTCCAACTGTGGGAGTTACTCGCGGGGGAGAGAGGGGTTGAGACCGGCGATGGAGATAC
CAATAAAGTAACCGCCCTTGAGCGAGTGCGCCTTGGACATGGTGCCACGGCGTATCTTTA
CCGAGAAGGAGACCGTGCCAGTCCGCGGGAGCACATTGCCGAGTACAATACTTCGCTGAG
ACTCCGGGATCATGCGGGCGGTCTGGACATTCACAATGGACATGTACTGCGAGTCGCACT
CACACCACGTCGGGACGAAGGGGATCAGACCGGTGTTGTCCTCTTCCTTGGCGTGCTCAA
AGAGCGTACGGACAAGGTTGGAGAAGGTGGACCTCTCCCGCACCTCGTGTACGTGTGGAA
TAATGGCCGGCAGCAGACTGATCGTGGAGATCTGAATCGAGTGCAATGGAAGCAGCATGA
GCACAGAGGCTGCGTCAAAGATCATATCACTCACCGAGTCCGACAGACTGCCGGTACCAG
ACACGATACGGCGCATGGTCGAGATCAACACCATAATAGAGTACTCCGCCACGGAGAAGA
TGACAGCCTGCTTAATACGGATGCGCGGGTCGGTGTCACCGCCGACGCCGAGGTTCATCA
AGGAAGAAGTCACCTTGTTCACGCTACGTCCCGCCACCTCGCAGCAGTCCGACAGAAACT
GCCGCCCAATCTTCTTCGACTCGGGTATGCTACACGCGCAGCAGGTGATGTAGTAGAGTA
CAATCTCCGCCGTGGAGGCGACACGGTACCAGGTAGGGCCGGTCACCAAATTGAGTGCCG
GGTGAAGTTGGCGGAAGTCATACAGAAACGCATTCGTGCCAAAGTTCACGCTGACATGAT
AGCCCGTCACATCGTCAAAGTGCAGCGCGGGGAAGACAACGTCTAATTTCTCCGAAACAG
CTCCGACAAAAAACAAAAACTTGCCGTTGAGTGTAAAGAACACTTTCCGATTCGTCGTAT
CCAAGCCGCACCCTACGCAGTCTCCTTCCCCATAAGCCGGGAACATTGTCGAGTGCGTCC
CGCCCGTGCTGTCGTAGAAGAAGACAAACGCGTTAGAGGCGTTCGTGCTGTGCAGACCGA
TTTCCAACTTTCCAGTAATCGCCGTAATCTTGGTTTCAAAGTAGAAGACGCGAGGCAGGC
CGTCCTTCCACTGCAGTGGCCAGCCCTCGTCCGCCCGGAGCAGACCCGCCGCCGAACTAT
TCTTCTGTATCACAATTCCATCACTCGTACGGGAGGTCTGAAACTGGGGAATGACAAACG
AAAAGTCGTTCGGGAACAGACGACTCAGAGAGCCCAAATCGGCCGCCCCCATGTACTCCG
ACTTCACCGTCTCCTCCTCCGCCTCGGAGACGGAGTGGAGGTCCTCCCGTCGTAGCCGCC
ACGGACTGGTGAGGGTCAAGTTACCAATCGGTACATTCAACTGTCCTTCCAGGTACTTGA
GCATGTCCACCTCCGACTTGTTACCGACAATGAACTCGCTATCCTTGTAATCCCATGGGT
GGCACAAAATGGCAAACAGCTTCATCGTCGTGCGCCCGTTATCGGGGGTGCTCTTGAGCA
CCACCTGAGGTTGAATATCTTTCGGACAGTCCCCAATCAGATACGCCTCGCAGCGCTTGA
GGACGGCGTGAAACGTGACCCGCACCTTCATCTCCAAGTGCGCCCCACACCCACTGAGAC
TGTCAATGTAGTGGGCACCGGAATCAATCACCATATACCGCCAGAGTACATCCACCACCG
CCGTCATGACCGTCTTGTAGTTGTCGTCATTCTCCATTGCCTTGTCAATGTCTAGCAGTT
TGCCCAGGATGGAAAGGCCCTTCTCGATCAGGATGGCCGCCTTCACTCGCTCCACCATCG
TCTTCTCCACCTGCTCCGGCCGCACCTCACGGGAGACCATGAAGCGGATTTGCTCCAGGC
AGTCGGAGGGGAAGGAGTTCTTGACAAAGCTGCGCCGCTGTGGGAAGGCGGAGGAGCTCC
GTCGGTCGGAGGTGGACCTTTGCGAGTTGTTGAAGGAAGAGTCGTACCGCTTGTCGGGGG
GCGCACAGGCGGACCGGGGCGTCTCCACCTCGAGGTCCGCATCCCGGACGGAGGTGGTCA
CCCACTTGGCGAGGCTGATGAGCAGCTCCTTGACGCTGTTCCGGTTGGCGCTCTGCAGCT
TCGCGCCCCACTCCCCGCTGATCCACCGCACCTTGACCTCATCCTCGGCCTGCTCCACCG
TACACCCACAGTGCACGAGGATGGCGAGTATGGCCTGAATGGCGGGCCGCATCGAAGGGA
TCACGCTGTTGCGCAGTCGCTGCAGCAATCGGTCCACATACACCTTCCCCTCCCCAGTGT
CCTCCAGTATCTCCAGCGGGAGTGGCACCCCGTCGTTGATCTCCGACGAGGAGGCGTCTG
TCTTAATATCGTGCTTCTCCAACACGACGGAGGAGAGTCCGTTACGGAAGAGTGGAGTGA
GGGGCAGGTCCGCGTTACGGGGCTGTGTCGTGAGGTACTGGCAGTACTGCAGCAGCAGGT
GACGCACCGTACAGCGCAGCAGGTTAGCCCAGGAGGTGTTTAGTTTGAAATCGTACTGCG
CCACTGTCGTGAAGGTGATTTCGCCGTCGCCGAAAAAGACAATTTTACCGCCATTGTTAA
TCTTTAAAAAGGTCCAGTCCGCCGACATGGAGGAGGTTCGCACCCCAGACTCCGACTTAT
CCTCGTAGAGAATGTGGAGTGGCTTCGTGCTTTCTTTTAATACGGAGACACTGGTGGCGT
TTCTAAAGTTCATGAGAAACCGCCATAGCTGGGACGCGTTTCGGCTTGGTGGGTACACAT
CGCACGCCTCACGGGTAATGAAAGACACCGGTACCTTTGGTTGCTCACAGTCCAGCTTTA
TTTTGGAAGAGAGTGCCAACAACCCTTCCTCCACTTTTGGCGATACGACGGAGGGACACC
TGGCGGCTACAATCACCAGCAACGGGATCAGGCCGGCGTGGTACACGGTGTAGCGCATAT
CCCCCGTGATGGAATCGTTGGTCAAGTTTTTACTCGCAAAGTCTACAAACACTTCGAGTA
TGTCGGTAATCTCCTTCAACTTGCCCACCGCCTGCAGGGAGCAAATGGCATTCACCACAA
ACCAAAACACAAGGCCGGTCATGGTGTGGTCGCCGTCCCCGCTCAGCGCCTCCTTGTGTG
TCACCTCAATCACGTGCTGTGCCACCTTTTTCATTTTATCCGATTCATTCGTCACAATGT
AATTAATAACGGGCCGGAGGGTGTCTCGTGAAATGTACCGTTTCAACAAATGCTCATTTT
CGGGCTTCTCGAGGTTCAGTAATATCTTTGCCTTCTCATCTAGCGGTAGGGACTGCAGCA
TGGCCGCATTCAGCAGCTCCGCCGCGGTGTCCTGGATCATCTTTTCCGTGAAGAAGTCCT
TCATGTGAAGGCAGGCGATCTTTAGCGTGTTGGCAATACGCGAAATATGTGACTCGTCCG
CCGTGAGCAGACCGTTGAAGTGAATCAACGTCAAGGAAAGGAGGGCTAATACTTTGATCT
TGCTCGTACTTGTGGTCACTTCTTTCAGAAGGGAGGCTAGTAGATCTAGGCTGGAGAGCA
AAAGAGGCGAGTTGTCCTCCGGCACTCGCTGCAGCTCCGTTCCCTCCAAGTGGATTCGCT
TGTACAACTCCGACAGAAACCACTCAATCGACTCCGACGGCTTGTCACTTTCCTTGATTC
CATTAATGGACAGTTCCTTTTCCTTCCACAACTTTGTGAAGAGACGAACACGGCTGAAGG
TGGAGAACCTCTGATGGTAGATGAGCAGCTCCGACTCATCGTAAAAGATGGAGTACAGAT
TCTCCGCCGATGAGCGAGGGCAGCGGTAGACACGAATGATCACATTTGTATTACGGTCGG
CCTCCGCGACGATGTCATCCGCCCCTTTATGATCGGATGGGAGCACAATGTAGATGCGAA
ACGCGCTCGTCAGCACCTTACCCTCCACCATGTGTCGCCCCTTCAGACGAACGGACGGTT
TGCTAGCGAGGTTGGTGTAGGGGACGTTAATCTTGCTATCCCACACAAAGAGCGTCTCGG
GGAGGTCCTTGCAGGAGGCCGACACCGTCTCCTTCGCCCACATACCCTCGCCCTCGTCAA
ACGGGAAATTAAACAGGGCGTGTGGGCTGTGCGCCATTTGCTTCTCCATGTAGTACTTTC
GTACAAAGGAGGAGTCGGACAGCTGTGCCCAGGCGGCGAGGGATCCAATGTGCCCCACGC
CCTTCACGCAGCTCGCGGAAAGAATCGACACCTCCTTCGACGGCCCATACCGCGCCCCTC
TCAGCTCCACGGCGGTGAAGTCAATGTAGAGCGACCACGCCCCTTTGCACCACTTCACCT
GCAAAAAGAGCCACGGGGAGGTGGAGGGGACGATGCCGTAGCAGGCGGAGTCGCCCTGAC
TAAGGGTCACAATATCCTTCTTGACATCAATCTTCAGCGCCTCGCTGTCGTTGCCAAGGG
TCACCAAGTTGCCACAAAAGTCCTTGTAAATGTGACTACAAATGGTAAAGTTTTCAATCT
TCTCCCGATTCAAATCTTTCAGCGAGATCAAATGCATATCCGTCTCTTGGAAGAGGTAGA
GCGAGTGGGAGTTGCCGTAGGAGAGGTACGGCGGAGGGAGGCACTCGAGCTCATTGTTCA
CAAAGTTCAGCGGCACGCTGACCTCCGACGTGGTCGTCTCCTGCACAATCTCGCTAAGGG
TAGAGGTGACGACGGTGTGGTTGATACCGGATTCATCGGTGCAGATGATGTGCTGCGAGT
CGTCCGAGAAGACCACATTCCAGTAACTCTTTCCCTCCGTCGGGTACTCTTTTTGCCCAA
TCAGGGAACCTTTCTGAAAGTCATACACGACGAGTCCGTTCACGGTGGACATGGCCAGGT
AATTGGTGTTGGGGCTCACACAGAAGCACTTCACGCTCGTCCCCTCCTTCAGCGTAATCT
TTTTGATCTTGACGGCATCCTCCTGGTAGCAGTCAATCGGGGAAACGACTGGGAGGTGGG
AGGTAGACTGAAACGAAAAGGACTGCAGTATTTCCTTCGCGTGTGGCATCATCAGCGGCA
CAATGTTGGAGGAGGAGGCGTTGTACTCCTCTAGTATTTTGAGAAAGTGGAGTAGCTCCA
TTACCCTTCCGCGGCTGCAAATAATAATCCCCATGAGGGAGCACAGCCCACTCTTCAGGT
TTGACGGACCGCTCCCCTGGAGGAACTCGCTGAAGGCGGTGAGCGCCGCCTCCACCACGT
CGCTCGACACCATCGACGCCAGCTGGGGGGAGTGGACGAGCTTCACAAACATGAGCTGCA
CCGTCTTCAAGCTAATTGTTTTGACATTACTAAGGAAACAGGGCGATCGAAAAATCCTCC
GCCTCCATGTGGGGATAGAAGAGAGACTCCGTCACGGTTTCGTCGAAAAGAGTACTCCCT
TCCTGAAAACTGACCGAGACGCGGCGGTTGGGGCTGAGGGCGGTTTCACTGTTGTCGCTG
CTTTCCACGCTATCCCCTGTCAGGTTCGCCGCGCTACCGCTCCTCGTCAGCGGCGGCTGT
GCCACACTGTTCCCCGCATCGAGATAGTTCTGCACCGACTCCAGGATGGCGTGGTTGTAG
ATCTCAAAGACGGAGGGTTCCTCAATCATACTATTGTACGCCGTCGCTAGCCCACGCACA
TACTGCACCACAGACTCTCTGCTGCGTACCGTGTTGCTGTCAAAGTCCGGCGGCGCTGGG
GGAAAGGGAAAGTTCACCTCCGCCCCCTCGTCGCCGCTTCTGAATGTAGGAGCGGTACCC
CTTGGTGTACAGCTGCGGGTAGGACAGCTCATACACACAGAGGTGGTCATCCTCCTCCTC
GCTGGGGTCCTGGAGGTAGATGGTGCCCTTGTCGACCGGTCGGGCCGGCACGTACTTGGC
GACGTAGGTGGTCGACCGGAAGGGGACGACGGCCTCTGCGGCGGTGTTGACATAGGGTGT
ATCCACGGAGAGTAGGTTCACAGGGGCCTCCGACTGCTGCAAGTCCATGAAGGAAAGATT
GAAACTATGGGCAAAGTCTGTCGCCATATGTATTGATTTTTGTTTTTGTTGTTATTCTAC
TTTTTTTTTTTTTTTTTGCTACTATTATGATTGGTGTATACTTTTTTTTTTTTTTTCGCG
GGTAAAAATGTTTATGTTTGCTTTACTATTTATTTAATGTAGGCAATGACCCACTGTTAG
TTCAACGATAAGTATCTCTTTTCTTTTTTCTTTTTTTCAACAAAAAAATGAAGCCTAATA
TCCTCTTTTTTTGTTGTTTCCTAATTATTCACCAATGACCTAATAACGCTACAAAAATAT
GTTAGCGTATAGGAGTTCCTTCTTTTTTTGTTAGCAAATCTTTATTTTTTGAACTATGTG
CCAGAAAATAAAAGATAATAATAAAAAAAAAAATTAACGAAATGAAGATAAAATGAATCA
ATATTCGAAAGAAAATAAAAAATGTAATACCTAAATTTGAGACAAACTACAAAAAAAAAA
GAGGAGTGTGAAAGAGTGATAATGTTGCCGCAGAAAATAAAATTATGAGAAGCATGTGAT
TTCAACAAATAGAAAAAGAAGTTTGATTGTAATTTTTTCTCGCTCACAGAAGTGAAAATA
ACAGTAGGGGGAAAAAAAGGAATGTGTGTTCGAGTCACCTTCTCGACAAAAGAGAAAAGT
CCATCCACTAGGATAAAGTCAGATACCTACCTCCTGCGGTTCCAGTAGGCATCGTCATAC
AATTGTAAAAAAGTGTGTTTGCAAGAAAAGATAAAAAAAAAAGGGGAAAACATATTTTCA
CCTTTTCTTTTTTCTTTTTGCTTTTCCTTTGGCACACTATAAAATAGGGATGGCTTCCTT
CCTGTCATGGCAAACCATAAAATGAGTGAACTCTTTTATAAAAACACACAAACACGAATA
AATTCGCGTTGTCTCAGTCGACCAAGAAAACAAAAAAAAAAGAGTAACACTACTAATAAT
CAAAAAAAAAAGGAGAAATACTAACAACAATCCCCTCGTGGGAAGCGCCTCGTATTAGTA
TTTCTTTCCATTTTCTATTTGACTTTTTTTTTTTTTTTACTCTTCCTTGTCAGCCGGTCG
ACGAGGACGCGGTCCTCATCCTCGGGGCCCGCAGCTGTCCACGACAGGGGGCTGGTCCGC
CTTGACCTCCGTTCCCCCTGCCACCGCCGCGGTGGGGTGGTTGGCCTCGTTGTCGTCTTT
AGGCGTGTTCACGGTGGGTCGGAAGAGGGAGTAGACCCACTTGACAATGTACATCACCAC
GTAGACAACGATCCAACAGGATACTCATACCATTTTCGGGAATAAAAATGTATATCTGAC
GGTGTGAAAGAGGGTAGGGGAAATAACGAACGTGAAAGAGAAGCAGTGCCGAACAAAAAA
ACGAAAAAAAAGAAAAACGAATTTATGTTATTGTTTTGTTTTCATTATATCGTATCGTGT
GTATAAGCAATTCACTTTTTTTTTTTACTCTGTAATATTCGTCCCCTGTAGAATCGCCTT
CTCCCACTCCTTCTCCAGCGATAAGTCTGTCATTTTATCAAATGCATACGACGTCTCGTC
TTGTCGGAGGTGTGCGGCCATCTCGCGGTAGAAGAGGGCGGCGACCTCTGGTATGGTCGG
TAGCTCTCCCGCTACATACCTCGCTCCCTCATCTCCTGGTGGAGGGAGGTGGCAGACTCG
CCGGGCAGCTCGCACATGACAATGTGGTCAAAGTAGGATAAGTCATTGCACACGTTGAGG
CCGGCGCCGTGCATGGACACCCAGCTGCCCAGCTGCAGGCCGATGGAGCCCAACTTGCGG
TGCGGCACCCCCTTCCCGCTCCTCCGCCCACACCCCTGTCTTATACGGGTGGGACGGGAT
CCCATGGGCAGTGGCGATGCTCATCATAGTGCGCTCGAGCACGGCGCTGTACCACACAAT
GGGGGAGCGATCCTTCGCCGGGGGCTGCTGCGCCCCTTGCCACAAGTGCTGCACGTGGAC
GATGGGGTACACGGTCAGCTGTCCTGGGCCGTGCCACGTGATGCCACCGCCCCGCCTCGT
CGGCACCACTTCTACCGTGGAGTCACGCGGCAGTCCCTCCGAGGTATCCCGGCGGCCTAG
CGTGTAGACCGGCTGTGCGTGCTCCACCATCAGCGTGACATCGGGGAGGGCCGGCTGGGT
CGTCTCGCCCCGTCTAATAAGAGATTGACGCTCTATTTTTGCCTTGTAGAGCGTTTCCTG
GACGGCTAGCACTTCCTTATATCCCCGTCGGCCTAGAAAGAAGCATTTCATTCAGTCGAT
TGGTATTGGTTTCGGTAATGTTCTGCTAGATTATAATAAAACGGGAGAGAAAGAATATCA
GAATTTTTTTCAACTGTTTTTGTTGATTTATTCCGTTTGTCTTCAGTACTCTTCCACACA
CGAAGAAAAAAAAAAGGAATTCATGGTTTTATTATCTATTGTTAAAAAGGGGGAATACAT
CTTTTTTTGATTTACATGACTAAATTACTTTTTTTTTTTTTTACTTTCAGAACAAACGAA
TCCACTCCTCCACTCTCTTAGAGTTCGTCGTTTTCATCCTCCTCGTGATCGTCGGCGTCG
TTGTCCTCCTCGGCGGGTGCTGGGGTGCCACGCTCGCCGTCCGCCTTCTTGTCCAGACGA
TTGTCGGACTCGATGAGCCGTGCCGTGTAGGTCTCCACAAAGGATTCAAAAGCGTCCGCG
GAAAGGGTGCCAACGTACTCGAGGGTCACCTCATTGTCATCCTTCTCTATCACCTTCAGC
TTGTTGTACCACTGTGACAGCACCACCGTCCCCTCGACGTCGTCGGTGGAGGCGAGCTCA
ATCACCTTGGGGATCCCCACCACACGCACGGAGAGACCCTCCGCCACCTCCTCGGACTGG
AGAGGGGCGAGCGCCTTGAGCACCACCACCTCGCCAATGTTTGCGTTTCTCAGGAATGCC
GTCTCCTCGTCGTTGGTGATGTAGTTGAAGGCCTCATCGGGGTAGGTGTCGGAGGAGCAG
AGGCACATGGCGGTGTAGGCCACCTGCGGGTGACGGGCGAGGAGGGCACCGCTGCCGAGC
TCGTGGAAGAGCGTCTCGCAGCAGGGGGCCAGTCGCTCAATGTCGTCCTGCTCTCCAATC
ACGAGGACGAGCGCCAGCTTACCAAGGGAGAGACTCTCCGATCCTATCTTGGCGTCCGCC
GCTAGGCACATAATGTCAAAGTCCACCTTCGCCACGCTGTGACCCAGCATAAAGTCCTCC
AGCGTCTCAAAGTCGTCGCCGTTGGGGAGCTCCACGGCGGAGAGCTCGTCCTCTGGGATG
AGGTTCCTGGCAGTGTTCTCGGGGTAGTGCAGGGGGAGGTCCGCCACCTTGTTCCACACC
TCCATCTCCCGCTCCGTCACGGTCACCCAGTGCTCGTTGACAAATATCTGGTTGGTCTCC
GTCCCTTCCATCTGACGTGTCACCTTGGTGGTGACGGTGACGCCCTCCTCCTCGTCCAGC
TCGCGCCACTCCGACTCCCCTTGTCTAGCTTTTTCTACGGTAGCCTGCTGTTGCTGTTGC
TGCATGGAGGCCCGTCGCTCCTCCTCCGTCATCTCCACATTCATCGACTTCTTGCGGTCG
TTGGCGCAGGGAGAAGGGTTGAGGTCCTCCTCCTCTATCTCGCCCACCGTTACTTTAGCG
GGCTTGATATCCTCCTCGTCTAGCTCACGGAACGCCTCCTCCTTCTTTTCTTCTGGCTCT
TCCTCTGCGGGGGTGTCGTCGGCTGCCTCTTCCTCTCCTAGTTCACGGTACTTGTCTTCT
TCTTCTTGTGCCTCCTCTTCTGGTTTGTCCTCTGGTTCTTCCTCAGCAGCCTTCTCCTCT
TCCTCAGGTTCCTCTTCGGCAGCCTTTTCCTCTTCCTCTCCTAATTCACGATACTGATCT
TCTTCCTCGGGAGCCTCTTCTGGCTTATTGTCCTCCTCAGGTTCTTCCTCCGCTGGCTTT
TCTTCCTCCTCGCCTAACTCGCGGTACGGATCCTCTTCCTTCTCTGCCGCTTCCTCCTCC
CCTAATTCTCTACTCTCCTCTTCCTTCTCCTCCAGCTCCACCTTGTCGGTCCCGGTGGTG
GGCTGCTCGCCCAGCTCCCGGTAGTCTCCCTCCTCGGTTGCCTTCTGGGGAGACTTCATG
CTCGACTCCTGATTGTACAAGAAGTCGGGGCTGGCCACCTTCGAGGTCGCCGGGGACTCC
ATGCTGCCGTCGATAGGATCCACGCTCACGGGGGATGGCTCCATCTCAATCGAGCCCACC
TTGCTGACACGGATGCCATTGTCCAACTCGCGGGTGGAGGTGTGGCTCTTGCGCTTGGTC
GTGATGGCAGTGATGCGGCTGCGAATGGTGGTGTTGTGGCCGACCCACGTCTGTGCTGCT
ACCGCCGTGACCTTGCCATCGGGGGATACGTCCAGATAGGTGCGCAGCTTGGCGATGGAT
TCTTCATCCAGCTCATACCCGTCTGCTTGGAGGGCGGCCACAAAGGCATCGAAGGACACC
TCCTGCTCCTCCCCAAAGTGTTTCTTCCAGAAGGCGAGCAAATCCTCGTTGGTGATGGCC
GCACCAGAAACAGTGATGGTGGCAATCTTTTCTTTTAACGTGCTTTCGTCGCCCATCCAC
GTTTGCATGGAGGCGGCGGTCACCTTGCGGTCGCCAGTCATCCCCACCGCAGCGAAGAGC
GCGTCGAGGGACTCTTGGTTGAGGTCGTACCCCTCCCGACGGAGCGCCACCTCCAGCGCA
TCGGTAGACACTTCCGAGTCAAACTCCTTAAAGTGCGCCCCCCAGAACCGCAGCAGATCG
GCGTTGGTGATGTAATCCGTATAGGGATTCTTCTGCTCACACAGGCTCTTAATGTATTTA
CATATCTTGGGCGTGTCAATCCCCTCAATCGTCCCCACGTGTTTGCCTTCCTTGTAGAAA
ATAAAGTACGGCTTGGAGTGCTGGCAGCGCTCCTCCAGAATGCTGGTCCAGTGGGCGGCG
GTGGTGTCAGGGGCGTAGCTCCTGGCCGACTTGGCCCGCTGCGGAGGAGCGTTCTTCACC
TCCTTCCCTTCCTTCAAGCTGTTCAACACCAAGTTGCACTCGACGGAGAAGAAGCGGAGG
TGCACCAAGTCCCCAGCGTCGGTGAAGAGACGACGGAAGGACTCATTGAGGGCCTTCGCG
TTCCCCCACTCCGCGTTGTAAATATCTAGCACCGCCACGCCGTGTTGGGCTTGGGAGATT
TGTAACTCATTCTCCAGCTGAGAGGCGCTGGTGATGTCTTTGACAACTTCCTTATTTTGG
TTTTGCATGATAAATTATCTTTTTTTTTTTTTTCTTATTCGTACAAATGGTTAAAAAAAA
AAAAAAGGAAGTATTTTATGTATCTCTAAAGGGGGAAAAATCCGGGGAAAAAAAAAACTA
TTTCTTGTGGTAGGAAGGAGAGAAACAGAATAGATGTTCAATTACCGCGGCAGTTCAACG
AAGTCACATACCGTGCGGAGTATTTTCAATCTTCGGTCGAAATAACCAAACAAAAAAAAA
TTAATAATAATAATAAAAGACGCAACGAACCACACGTTAATTTACATACGATCATATATA
CTATACACATACCCCTAGTGCAGTCCACCGTGTCCCCTGCCAGCAATCGGAGGCAGCACG
GTGCCGGCTGGCCGTGGACTAGGGGTGTTCAGCCTGCTCTTCACGAGGACGGTATCCTCC
GGGGCTGGGGAGTCCCCCCGCCGGCCTCGACTGATCCGACCGGAGTGACTCGTACGAGGG
GTCTGAGGCCTCGTAGGGATAGGCGTCCGTGGGGGTGGCTCTACGGCTGGACCGTCCTCC
ACGTACTTGGGTGTCTCCCGCCACAGCTGCTCCAGCGCGGAGAGGCGTCTCTCTAGGGTA
ACGGTTTGGAGGAGGGAGGGGTCCTCGTCCTCCATGAGGGCAATCACAGTTCTTCTTGTT
GTTTTCGATCTTGTACTGTTTTGGGGGTAAAAGTAGAAAAAGAAGAGGGAGTGAGAGGGA
AAAGTGTATTGGCAGGTAGTCGAAACCTATACGGAATCTAATACAGCTTGTATTGTTTAT
CAATTTATTACCCGTTTATAGGTGGCATTCTTTTTTTTTTTTTTGTATTTATATTTTTTA
GGTTAACCTGTTCTTTAACAGAAAACGGGGAAACAAAAATTCTTAATCCTATCAAACTTT
ACTAAAATAACACGACAACATAAATATAAAAAACTTTCGTTAATAATTTTTTTTTTTTTG
AAAAAAAAAAATTAAAAAAAAAAAAAGAAAATAAAGAGTTTCACTTTTTTTCCTAAATGG
TAGATTCGGCGTTAAACAGGTAGTAGCGAATGGTAGGTAGCTGCTCCTCGAAGCTGCTCT
TGGTGCGGTAGGAAAGGGTGTTATTGCAGACAATACGGCCGTCCGTGGAGACTACGACTA
CGCCGCCCCACGAGTCCTCGTTGAGGTACTCCTTGCTGACAGAGACAGTCGCCTCCGTAC
CGGTCTTCTCCTTGTACCACCGCTGCAGCTCCCCCAGCAGGGCGGACACCTTCTTCTCAT
CCTCCTGCCGGACATGAACAACGGAGTCACTGCGGATGGAGAGGAGCGACTGGTAGAGGA
GGTCCTTGAGGAGCTTCTCATAGGCGCTACCATTCGCCACAATGGCCGACACACGCTTGC
GGGTCTCCTCGTGGAGCTTCTCCATAATCTTGGCGCGCTCCTCCATGACACGCATGCGCT
GCTCCTTGGAGTAGTTGGCACGGCCGACACGGCGGTCCACCTCGGCCTGCTTCTTCTTCT
TTTCCGTGTTGGCCCTGATCTTGGTCTTCTCGGCCTCCACCAGGCGCATCTTCTCCACGT
CGTACTCCTCCTGGGCGGCGGCCTCTAGCTCCTCCACCTTCTCCTGCGCCTCGCGCTCAA
TGAAGTCTATCATGGACTGAATCTGACGTGCTTCGCTCATTGTGGTGGTGAAATGGGGTT
TTATATATTAATAATAATAAAATTAATAATAGAACGGTAGTTTTCTTGTTTAGGACGATA
CTAACTTGGAAGCATAGAGAGAAAGAAAGAGGAAATGCAAATTTGAACAGCGGTTCACAA
GTGGTAGGAGGGATTTTTTTTTTTTCTTTGCCAGTTGTTATTATTTATTTTTTTTTTTAT
TTTTTAATTTCAAAAAAAAAAAAAACAATTATGTGACAGATTAAGAAAGAAAAAAAATGA
TTAAGGTTTCTCCTTAGTCGCTCAGCTGCACGTACACCTCCCACAGAAACAGCGCGACGA
GAGGAAGGTTGACTGGGAGGAGTTGCTGCCGCCACAGCTTGAACCGCCAGTGGTGCACCG
ACACTAGCATGGCGTACAGGGACCACCCCGCGAAGACGGTGAGGCGACTGGCGGAGGGGA
CGGTGGTGTAGGGGAAGGCGGCGGCAGCGAAGAGGGCACCGAAGATGAGTAAATAATTTT
GAAAGGTCAGAAACCACCGCACCCCCTCCCCGCAGGAGAAGAAGACGTAGAAGCACATGC
ACCAGCTCGCGACGCCGTGCACCCAGAACAGGTACGACAGGAGAGACAGCATTATTATTT
TATTCTGTTGTTGTTTCCTAATAGTATGTGAACTATCTAAAGGTTGTAAGGAGATCGAGA
AAATGGTGGTGGGAAATGATTTTAAAAAAAAACAGCAGCTCAAAAAAAAAAAAAAATGAA
AGATCCACTCCCAGGACCATCGTTTTCTTTGTTGTGGCTATTCACTCACCACATCGCGAG
CTCGCTTCAAGCAGAGCGTCGTAATCAGCGACTTCTTCTTCGGCTCCGTCGTCGTGCCAT
ACTTGTCTAGTGTCACCTTCCGTTCCGCGGTGGTGCCCCGCCAAAACGTACGCAGCATCG
CTAGCGTTTCCTTATCTTGTGTCTCTGAAGGCAGTTTGGAGAGCACATGATGGCCAGTAA
AGGGCGGCGCGCCATCCGCCTCCACTCGTACCTGCCGGACCGCCTCTCGCAGGGAGACTT
GTACCGCAGAGATGTCTAGCAGGGCTGCCTTGACCTCCTCCAGCGGCCTCGCAGCGTAGA
AGAGCTTCTCGTGGGGCAGCACCGTCTCCTGCTCATTCTCCGCCGCTAACAATAGTTCCG
CCTCGACACCAGGTCCTTCCTCCTCTTCTGTTGGGGCGGTGTTCGTCACGGCAGGGAGCG
CCGACCGCGAGAGAGCATTGATGGCATTCAGATTCTCCACCTTGGGTACCGCGGCGGTGC
TACCCTCGGCGTCCTGCAGCTCCTCCTCCAGGAACGTGTTGGCGAAGCAGAAGTACTTTC
GCACCACCGCCTCCCAGAAGGATTGGCGGGTCTCCTCGCTCACGACGTGCCGCCCGAACA
CCACCGCGAGGGCGGGGATCTCCCGCAGGATATCACTCTCCACCTGCTCCGTGATGGGCA
CCAGCTGATAGGTGACGGGGTGTATCAAGGACTCCAGGGCCCCGATGGACTGTACCACGC
CTCGCTGACACTCCTCGTCTAAAATAGCCTGCAGCTCCTCCTCCGTCACCACCCCGAGGT
CCACCGCCGGCTGCAGCACAGCGGCGTAGAGCCAGGTGTCATTCTTCTTTTCCTCCACGC
CGCCTTGGGCCCGGACGAGCTGCTCGATAAAGCGCTCCCGGTCGGCCAAACTATCAAAGG
ACGCCAAGTACTGCTTATCTCCCTCCACCACAATCTTACACATACCTTGTCATCCCGCTT
GGAGCGCAAGAGCTGGCCCACCTCCGTCGCGGAGAACTGAATCTGATCCTCGCCGCCGGT
GAAGCTGACGAGGCGTCCGTTAATCTGCACGTCGCCTTCTACATTATTGAAGGTGACTTT
CACCATGCTAGTAAATCCTTTTTTAGTTTGTTTGCCTCTGCTGTAAAAAATTGTCAGGGA
GAGAAGGAGAATGATTAGAAAAAGAAATACACGGAAAAGTACTGCAACGACCATAAAGCA
CTTTCGTGTTTGTATTTATTTTTCGTAATGAAGAACAGTATTTACATATATACCTGTGCT
TGGTTGGTACGGCATTCACACGGTACGGCGGAAAGAAACAAAAGTGCTAAGCACCGTTGC
GCACCTTTTCCTTTTTTTAACTAATATTTTCACCTACCTCCAGTGATTAGAGTGAGCGTT
TCGTCACCACAAAACTACGAATATCCTTAATACCTCTCGAGATAAGCATCCTTCGCACCG
CATCAATGTCGTTGACATCAATCACCAACGAGTCCGGCAGCAACACCTCCTCCGTGGAGT
CATCCACGTGGGTGACGGTGATGGACCTCAGCGGCTGCCCGCTACGGTAGGCGTCCGTTG
CCGGGATGTCCCAGCTGCTGCTCACAATCGCCATGAACCGCTCGTCGTCGCTGTAGACGG
GGGAGATATCATTGTAGTACTCCACAAACTCATTTTGGGTCACGGTGCCGATTTTAGTCG
TCACACGGCCGGGCCAACTGTTCTCAAAGTCAAAGATGAGCTCCTCTGCGCTGAGGAGGC
CGTCGAGGACGTCGGGGTGCTGGTGGGCATTGACGCGATAAATATTATACATGTCGATGA
ACTCTACGGCGCCATGCCCCTCCACGACGAGCGCCTGGTAGGCAAGGGAGACGGCCCTCA
TGCGCTCCGGGGGCATGTTGCCGCGCAGCTCTGACAGCAGCTCCTGCGCGCTGACCCTGG
TGTCCCCGTCGTGATCGCACTTCTTCATGACGATATCAATCTCGCCCGGGCTCAGTCGCA
GTCCTGCCTGTGTCAGCAGCGAGGTGAGCTGCTGCCGTGAGACGTAGGTGGTCCTGTGCT
CCTTGGTGGAGACGCCTAACGCACGCGATATCGTCCGGAACCCCAGACGGCCGCCATGCA
GCAGCACCTTCTCCCGCACGTGGTGCATCAGCTCCTCCACCTTCTCCTCCTGGGCGGACT
TGGTCGTGGCCGATCGATTGAGCGAGCGCGTGGAGCGGGCGGCAATGGGGGCGGCCCCGT
CCCCGTCGGCGGCAAAGAAGAACATATTCTCCTCCTTGGCGACGATGGCCGCCTTGGACC
GGCTACGGTTCTCTAGCGCGTACTCGCAGGTGATCTTTGGTTCTACCCCAAAGGTGGTCC
GGTGGGTCTGACCGCCCAGGCAGAGGGGCAGGTTGGTGATGGAGTGGATGAGGCCCACAG
AGTCCCCCAGCTGCACCGGGTCGCCGTCGAGCACCTGCCCACGCGGGAGGTTGGGCTTCA
CCACCACAAATATATTATCCGTGCTCGCCCCGTACCGCACGCAGGCGGACTGACCCTGGG
AAGAGCCCAGGCCGCTCGCCAGCTCCGAGTGGACGTACAAGAATCCGACCTCACTGGCGT
CCTCGTTGGCAATGCGCACCCGCTGTCCGTAGTGTAGCACATCTGGCTCCTTGATGAGAC
TGTTGAAGGCCTTGTTATCGGCATCCTGCGCCCGCTGCAGCACCCACGTGTTGCGTACCT
GGGGGGTCTTGCCTGGCACAGCGGAGAGGTTTCCGCCATTCGAGGCGGCGAGGTCTAGCG
CTAGGGTGCTCCCTGTCTTCTTATTCACGACCAAGAGGGGTTGGCCGAAGCGGACGGGGC
CGGTCTTGTCGTCCGAGAGGGCCGCTGGTTGTGTCAGGAAGGACTTGGTCATTTCCAGTG
ACGTGGCACCACCACCACCGCGGGTGGACGCCATCCCCGGCCCCTGACTCTCCGCCTTCG
CCCTCTGCGCACGGTAGAGTGCCACCTGATCCTCCTTCGACTGCTGCTCCTCGTACCAGT
TGCCTACCAGCACACCAGGGCGGTACCGCTGCACACCACTGCCGTCCATAAGGAAAGGGG
GGTGAATACAAAAAGTGGATGAAATAAAGAATAACTAGTCGTGAGGGAATAATAAAAGAG
AAAAGGAAAAGTGATGGATAGAAAACAAGGAAGGCATTTTTTTTTCCCCAATACCACTAG
ATTAATAATTTTTTTTTTTAGCTATTTTCATATCAGTTTCTGTAAAACATTAATGTATTA
TTATCTCACCTAAACAACGGAAAGGGGCGCAATTACCTCTATTACAGCTTCCCGCAATCC
ACGACGACCACACGCACGGAGGGTTGGCCGGTGGGGGAAGGGGTAATGTTCTCAATCTCC
TCAATCACCTCCATCCCCTCCGCCACCTTGCCGAAACAGATGCACGTCCCGTCGAGGTGG
GGGGCCTTGTCCGCGGTAAGAATGAAGAACTGGGAGCCATTCAGGTGTGGGGCACTCACC
GCCGTCCCTAACAGACCGCGTGTGTCAAACTTCGATTGCCGCACCTCCTCGGGCGCGTCG
TACGTGTCCCCGAACACGGACAGCTGCCCCGTCCCCTCCGCACTGACAATGTCGCCCCCC
TGCACGCAGAAGCCCCGCACGACCCGGTGGATGTGCGTGTCGCGGTAGGAGAGTTGAGGC
AGGAACTGGTCCCCGAAGGAGGGGTCCTCTAATCCGTCCACGCTAGATACCATGGGCAGC
ACATTCTCCCCGGTACACAGTTTCAAAAAGTTTTCCGCCGCGATGGGGCACTTTTTTTCA
AATAGCTCGAAGGTCACACGTCGTGGGGCGGCATTGCCTATTTTCAGGTCCATGAACGCC
TGGCCGGCCAATCGTCTACAAGTGAAGCGAAACATTTATTTATTTATTATTTCGTTAACG
TACAGATGACTTTAAAAAATGAAAAAAAAAAGGAGAAAGGATCAGGTGATTGCACTCTTG
GACAATGCGAAACCATTGAGGGAAAACAAAAAAAAAAAAAAAAATCTGGTAGGAATAATA
ATAAAATTTGTATTGTATGATCGGTTTTGGCACAAAATAAGAATTATCTCACTAGACAAA
ACAGAACGAGAATGTATGACTAACGTGTTTCTATGAGGGAAAACGGAGAACAAAATAAAA
GGGCATGATAAGTGCAAAAGTGCACTTCGCCCTAATGTTCCTTGTTGCTCTATGAGGGGG
TGAAAAGGAAACTAAAAATAAATAATAATAAAAAAAAAAAAGGGTGTGTGTTATCGTACC
TCATTGGCGTACGTATCTATGAAAAGTCCACCTCACGGGCGTGCTGCCGTATGTGTTGAG
TGCTAATCTCCCCCGCTAATATGGCCTCCAGCACCTCGCCGCCGCCGTAGTAGAGGTCCC
[truncated: 21,791,020 more chars]
